# Supplementary material for: Human embryo polarization requires PLC signaling to mediate trophectoderm specification
Source: eLife. 2021 Sep 27;10:e65068. doi: 10.7554/eLife.65068 (PMC8514238; doi:10.7554/eLife.65068)
Supplement: Figure 1—source data 1. — This file contains the source data used to make the graphs presented in Figure 1 and Figure 1—figure supplement 1. GraphPad Prism was utilized to visually represent the quantitative data. [file elife-65068-fig1-data1.xlsx]

## Sheet: Figure 1b, c and d
ANALYSIS OF COMPACTION
Duration of compaction			Completion of compaction			Initiation of compaction
# Emb	tSC to tM		# Emb	tM (hpf)		# Emb	tM (hpf)
1	1.51611		1	72.29		1	70.7776
3	2.00068		3	83.95		2	87.9667
4	5.39535		107	74.23		3	81.9445
7	6.7		135	90.45		5	76.7194
8	3.00075			80.23		26	73.45
9	4.503					27	73.75
13	18.4					31	72.25
14	1.74825					109	88.6667
17	5.00145					116	73.9167
19	6.0019					135	83
40	2.20762
42	6.21092
44	7.21551
79	2.85
80	5.9
81	2
82	10.1
83	3.05
85	1.9
86	7.05
87	4.95
108	21.95
111	13.2
112	10.95
113	3.45
117	13.45
134	12
135	7.45
149	15.5
151	3.8
154	12.55
172	14.3
176	3.75
178	12.6
179	6.38352
203	11.8
204	10.7
206	11.25
207	4.7
208	4.8
209	6.4
235	6
237	2
252	1.85
253	3.2
254	2.1
255	3
257	11.4
258	5.85
260	5.2
	6.9857

## Sheet: Fig 1e and f
DYNAMICS OF F-ACTIN AND PARD6 POLARISATION
Embryo #	Culturing time	Number of F-actin polarised cells	Number of Pard6 polarised cells	Total number of cells	Number of F-actin non-polarised cells	Number of Pard6 non-polarised cells
2	24h	6	5	7	1	2
4	24h	21	21	28	7	7
6	24h	9	14	19	10	5
7	24h	13	5	15	2	10
8	24h	15	2	16	1	14
11	24h	0	1	10	10	9
13	24h	5	9	17	12	8
16	24h	11	11	19	8	8
17	24h	14	14	15	1	1
19	24h	16	16	23	7	7
20	24h	0	0	14	14	14
77	24h	4	0	16	12	16
79	24h	6	4	17	11	13
80	24h	11	13	17	6	4
81	24h	7	3	9	2	6
84	24h	12	0	12	0	12
107	24h	5	20	26	21	6
108	24h	12	3	15	3	12
109	24h	0	0	12	12	12
110	24h	8	8	17	9	9
112	24h	17	17	21	4	4
113	24h	15	15	33	18	18
114	24h	0	0	2	2	2
115	24h	23	23	35	12	12
116	24h	0	6	10	10	4
117	24h	10	12	14	4	2
118	24h	8	20	24	16	4
131	24h	2	2	3	1	1
133	24h	2	4	16	14	12
134	24h	17	12	24	7	12
135	24h	0	0	8	8	8
136	24h	0	0	5	5	5
22	2h	0	0	8	8	8
23	2h	0	0	10	10	10
25	2h	0	0	8	8	8
27	2h	0	0	9	9	9
28	2h	0	0	8	8	8
29	2h	0	0	9	9	9
30	2h	0	0	8	8	8
32	2h	0	0	7	7	7
62	2h	0	0	8	8	8
64	2h	0	0	8	8	8
60	2h	0	0	7	7	7
59	2h	0	0	6	6	6
57	2h	0	0	9	9	9
56	2h	0	0	7	7	7
55	2h	0	0	7	7	7
54	2h	0	0	8	8	8
53	2h	0	0	8	8	8
1	9h	12	0	12	0	12
5	9h	0	0	9	9	9
10	9h	0	0	9	9	9
2	9h	5	0	15	10	15
5	9h	0	0	8	8	8
52	9h	0	0	8	8	8
51	9h	0	0	8	8	8
50	9h	4	1	11	7	10
49	9h	1	0	7	6	7
48	9h	0	0	11	11	11
47	9h	14	14	16	2	2
45	9h	10	5	16	6	11
44	9h	6	0	12	6	12
43	9h	0	0	2	2	2
41	9h	0	0	6	6	6
38	9h	0	0	7	7	7
36	9h	0	0	9	9	9
35	9h	0	0	8	8	8
34	9h	0	0	16	16	16
33	9h	0	0	9	9	9
		321	280	853	532	573

## Sheet: Fig. 1g
QUANTIFICATION OF F-ACTIN AND PARD6 POLARIZATION IN EMBRYOS WITH KNOWN FERTILISATION TIMES
# Emb	N cells F-actin polarised	Immuno_hpf	N_Cells	N cells F-actin non-polarised		# Emb	N cells Pard6 polarized	Immuno_hpf	N_Cells	N cells Pard6 non-polarised
1	12	78.1667	12	0		1	0	78.1667	12	12
2	6	93.1667	7	1		2	5	93.1667	7	2
5	0	79.0833	9	9		5	0	79.0833	9	9
25	0	74.25	8	8		25	0	74.25	8	8
27	0	74.25	9	9		27	0	74.25	9	9
28	0	74.25	8	8		28	0	74.25	8	8
29	0	74.25	9	9		29	0	74.25	9	9
30	0	74.25	8	8		30	0	74.25	8	8
32	0	74.25	7	7		32	0	74.25	7	7
107	5	96.0833	26	21		107	20	96.0833	26	6
109	0	96.4167	12	12		109	0	96.4167	12	12
116	0	93.4167	10	10		116	6	93.4167	10	4
131	2	92.75	3	1		131	2	92.75	3	1
135	0	94	8	8		135	0	94	8	8
153	0	96.4167	11	11		153	0	96.4167	11	11
201	0	95.25	10	10		201	0	95.25	10	10
210	8	99.9167	12	4		210	8	99.9167	12	4
	33		169	136			41		169	128

## Sheet: Fig 1i
DYNAMICS OF F-ACTIN AND PARD6 POLARISATION
MEDIA CONTROL	F-actin apical enrichment	Pard6 apical enrichment	Ratio F-actin (apical/basal)	Ratio Pard6 (apical/basal)	F-actin apical (per embryo)	Pard6b apical (per embryo)
Embryo 20
apical	7.72	7.56	0.816931	0.883178	0.863103	1.16381
cytoplasm	5.24	8.14
basal	9.45	8.56
180914 2 9 24h Gata3 Factin Par6.lif - 24h/20:0162-0655-0662:c:2/5 z:33/84 - 24h/20	8.91	11.01	0.953961	1.36262
180914 2 9 24h Gata3 Factin Par6.lif - 24h/20:0162-0623-0684:c:2/5 z:33/84 - 24h/20	4.93	15.96
180914 2 9 24h Gata3 Factin Par6.lif - 24h/20:0162-0488-0580:c:2/5 z:33/84 - 24h/20	9.34	8.08
180914 2 9 24h Gata3 Factin Par6.lif - 24h/20:0222-0193-0387:c:2/5 z:45/84 - 24h/20	6.31	9.99	0.818418	1.24564
180914 2 9 24h Gata3 Factin Par6.lif - 24h/20:0222-0230-0427:c:2/5 z:45/84 - 24h/20	4.27	6.94
180914 2 9 24h Gata3 Factin Par6.lif - 24h/20:0222-0223-0551:c:2/5 z:45/84 - 24h/20	7.71	8.02
Embryo 19
180914 2 9 24h Gata3 Factin Par6.lif - 24h/19:0197-0543-0358:c:2/5 z:40/84 - 24h/19	20.15	26.33	3.74535	2.46767	1.93213	2.09015
180914 2 9 24h Gata3 Factin Par6.lif - 24h/19:0197-0549-0389:c:2/5 z:40/84 - 24h/19	5.97	11.89
180914 2 9 24h Gata3 Factin Par6.lif - 24h/19:0197-0444-0334:c:2/5 z:40/84 - 24h/19	5.38	10.67
180914 2 9 24h Gata3 Factin Par6.lif - 24h/19:0197-0584-0630:c:2/5 z:40/84 - 24h/19	7.63	18.36	1.56996	2.02426
180914 2 9 24h Gata3 Factin Par6.lif - 24h/19:0197-0550-0618:c:2/5 z:40/84 - 24h/19	4.72	13.19
180914 2 9 24h Gata3 Factin Par6.lif - 24h/19:0197-0439-0716:c:2/5 z:40/84 - 24h/19	4.86	9.07
180914 2 9 24h Gata3 Factin Par6.lif - 24h/19:0177-0328-0760:c:2/5 z:36/84 - 24h/19	15.67	15.12	1.52878	2.00797
180914 2 9 24h Gata3 Factin Par6.lif - 24h/19:0177-0326-0705:c:2/5 z:36/84 - 24h/19	5.94	9.9
180914 2 9 24h Gata3 Factin Par6.lif - 24h/19:0177-0256-0686:c:2/5 z:36/84 - 24h/19	10.25	7.53
180914 2 9 24h Gata3 Factin Par6.lif - 24h/19:0177-0152-0648:c:2/5 z:36/84 - 24h/19	13.01	20.84	0.884432	1.86071
180914 2 9 24h Gata3 Factin Par6.lif - 24h/19:0177-0167-0589:c:2/5 z:36/84 - 24h/19	6.31	10.75
180914 2 9 24h Gata3 Factin Par6.lif - 24h/19:0177-0154-0533:c:2/5 z:36/84 - 24h/19	14.71	11.2
Embryo 17
180914 2 9 24h Par6.lif - 24h/17:0395-0112-0265:c:3/4 z:100/133 - 24h/17	48.32	73.86	3.14993	1.91298	2.31247	1.60115
180914 2 9 24h Par6.lif - 24h/17:0395-0113-0267:c:3/4 z:100/133 - 24h/17	27.67	31.05
180914 2 9 24h Par6.lif - 24h/17:0395-0134-0217:c:3/4 z:100/133 - 24h/17	15.34	38.61
180914 2 9 24h Par6.lif - 24h/17:0395-0126-0156:c:3/4 z:100/133 - 24h/17	34.09	59.69	1.59448	1.48483
180914 2 9 24h Par6.lif - 24h/17:0395-0116-0152:c:3/4 z:100/133 - 24h/17	36.4	42
180914 2 9 24h Par6.lif - 24h/17:0395-0206-0121:c:3/4 z:100/133 - 24h/17	21.38	40.2
180914 2 9 24h Par6.lif - 24h/17:0351-0190-0331:c:3/4 z:88/133 - 24h/17	37.6	85.93	1.84043	1.84162
180914 2 9 24h Par6.lif - 24h/17:0351-0192-0344:c:3/4 z:88/133 - 24h/17	25.55	30.76
180914 2 9 24h Par6.lif - 24h/17:0351-0223-0319:c:3/4 z:88/133 - 24h/17	20.43	46.66
180914 2 9 24h Par6.lif - 24h/17:0351-0314-0219:c:3/4 z:88/133 - 24h/17	40.59	57.52	2.71505	1.42871
180914 2 9 24h Par6.lif - 24h/17:0351-0306-0224:c:3/4 z:88/133 - 24h/17	21.15	29.35
180914 2 9 24h Par6.lif - 24h/17:0351-0282-0262:c:3/4 z:88/133 - 24h/17	14.95	40.26
180914 2 9 24h Par6.lif - 24h/17:0319-0276-0308:c:3/4 z:80/133 - 24h/17	70.89	62.51	2.66104	1.66383
180914 2 9 24h Par6.lif - 24h/17:0319-0268-0314:c:3/4 z:80/133 - 24h/17	30.21	35.43
180914 2 9 24h Par6.lif - 24h/17:0319-0274-0262:c:3/4 z:80/133 - 24h/17	26.64	37.57
180914 2 9 24h Par6.lif - 24h/17:0339-0277-0131:c:3/4 z:84/133 - 24h/17	39.33	58.2	1.91387	1.27492
180914 2 9 24h Par6.lif - 24h/17:0339-0267-0136:c:3/4 z:84/133 - 24h/17	14.29	42.86
180914 2 9 24h Par6.lif - 24h/17:0339-0227-0162:c:3/4 z:84/133 - 24h/17	20.55	45.65
Embryo 16
180914 2 9 24h Par6.lif - 24h/16:0399-0089-0198:c:3/4 z:102/133 - 24h/16	60.98	117.76	2.03674	1.55192	2.60379	1.61642
180914 2 9 24h Par6.lif - 24h/16:0399-0109-0186:c:3/4 z:102/133 - 24h/16	13.35	69.71
180914 2 9 24h Par6.lif - 24h/16:0399-0126-0165:c:3/4 z:102/133 - 24h/16	29.94	75.88
180914 2 9 24h Par6.lif - 24h/16:0399-0168-0147:c:3/4 z:102/133 - 24h/16	43.41	113.02	4.05322	1.86872
180914 2 9 24h Par6.lif - 24h/16:0399-0173-0153:c:3/4 z:102/133 - 24h/16	6.14	66.33
180914 2 9 24h Par6.lif - 24h/16:0399-0187-0213:c:3/4 z:102/133 - 24h/16	10.71	60.48
180914 2 9 24h Par6.lif - 24h/16:0399-0226-0228:c:3/4 z:102/133 - 24h/16	87.43	83.28	2.65987	1.14521
180914 2 9 24h Par6.lif - 24h/16:0399-0197-0236:c:3/4 z:102/133 - 24h/16	11.68	54.39
180914 2 9 24h Par6.lif - 24h/16:0399-0165-0266:c:3/4 z:102/133 - 24h/16	32.87	72.72
180914 2 9 24h Par6.lif - 24h/16:0399-0125-0271:c:3/4 z:102/133 - 24h/16	37.12	156.45	1.66532	1.89982
180914 2 9 24h Par6.lif - 24h/16:0399-0130-0241:c:3/4 z:102/133 - 24h/16	23.72	83.75
180914 2 9 24h Par6.lif - 24h/16:0399-0124-0227:c:3/4 z:102/133 - 24h/16	22.29	82.35
Embryo 12
180914 2 9 24h Par6.lif - 24h/13:0315-0359-0264:c:3/4 z:77/133 - 24h/13	66.65	95.32	2.62092	1.46174	1.78871	2.27439
180914 2 9 24h Par6.lif - 24h/13:0315-0345-0268:c:3/4 z:77/133 - 24h/13	30.55	53.97
180914 2 9 24h Par6.lif - 24h/13:0315-0301-0295:c:3/4 z:77/133 - 24h/13	25.43	65.21
180914 2 9 24h Par6.lif - 24h/13:0315-0294-0341:c:3/4 z:77/133 - 24h/13	44.53	90.33	1.82052	2.54522
180914 2 9 24h Par6.lif - 24h/13:0315-0305-0343:c:3/4 z:77/133 - 24h/13	30.87	47.02
180914 2 9 24h Par6.lif - 24h/13:0315-0296-0295:c:3/4 z:77/133 - 24h/13	24.46	35.49
180914 2 9 24h Par6.lif - 24h/13:0403-0174-0287:c:3/4 z:101/133 - 24h/13	48.11	77.52	2.31967	2.53665
180914 2 9 24h Par6.lif - 24h/13:0403-0182-0305:c:3/4 z:101/133 - 24h/13	26.1	45
180914 2 9 24h Par6.lif - 24h/13:0403-0223-0257:c:3/4 z:101/133 - 24h/13	20.74	30.56
180914 2 9 24h Par6.lif - 24h/13:0403-0208-0166:c:3/4 z:101/133 - 24h/13	23.42	109.07	0.730278	2.91475
180914 2 9 24h Par6.lif - 24h/13:0403-0186-0188:c:3/4 z:101/133 - 24h/13	18.26	38.29
180914 2 9 24h Par6.lif - 24h/13:0403-0240-0208:c:3/4 z:101/133 - 24h/13	32.07	37.42
180914 2 9 24h Par6.lif - 24h/13:0403-0386-0203:c:3/4 z:101/133 - 24h/13	36.29	89.67	1.45218	1.91357
180914 2 9 24h Par6.lif - 24h/13:0403-0412-0240:c:3/4 z:101/133 - 24h/13	17.55	61.46
180914 2 9 24h Par6.lif - 24h/13:0403-0388-0265:c:3/4 z:101/133 - 24h/13	24.99	46.86
Embryo 11
180914 2 9 24h Par6.lif - 24h/11:0419-0243-0361:c:3/4 z:105/133 - 24h/11	36.18	28.73	1.10676	1.16646	1.22943	0.95451
180914 2 9 24h Par6.lif - 24h/11:0419-0241-0345:c:3/4 z:105/133 - 24h/11	17.27	26.32
180914 2 9 24h Par6.lif - 24h/11:0419-0308-0317:c:3/4 z:105/133 - 24h/11	32.69	24.63
180914 2 9 24h Par6.lif - 24h/11:0419-0354-0301:c:3/4 z:105/133 - 24h/11	24.05	30.17	0.74114	0.726988
180914 2 9 24h Par6.lif - 24h/11:0419-0359-0265:c:3/4 z:105/133 - 24h/11	13.06	57.94
180914 2 9 24h Par6.lif - 24h/11:0419-0304-0270:c:3/4 z:105/133 - 24h/11	32.45	41.5
180914 2 9 24h Par6.lif - 24h/11:0419-0346-0159:c:3/4 z:105/133 - 24h/11	39.77	39.23	1.74813	0.970079
180914 2 9 24h Par6.lif - 24h/11:0419-0314-0164:c:3/4 z:105/133 - 24h/11	21.1	45.23
180914 2 9 24h Par6.lif - 24h/11:0419-0286-0204:c:3/4 z:105/133 - 24h/11	22.75	40.44
180914 2 9 24h Par6.lif - 24h/11:0495-0145-0182:c:3/4 z:124/133 - 24h/11	39.77	32.35	1.3217	#DIV/0!
180914 2 9 24h Par6.lif - 24h/11:0495-0162-0223:c:3/4 z:124/133 - 24h/11	11.63
180914 2 9 24h Par6.lif - 24h/11:0495-0192-0146:c:3/4 z:124/133 - 24h/11	30.09
Embryo 8
180914 2 9 24h Par6.lif - 24h/8:0423-0173-0232:c:3/4 z:106/133 - 24h/8	62.61	74.49	3.50953	2.16226	2.96115	1.13431
180914 2 9 24h Par6.lif - 24h/8:0423-0187-0228:c:3/4 z:106/133 - 24h/8	26.36	41.56
180914 2 9 24h Par6.lif - 24h/8:0423-0204-0184:c:3/4 z:106/133 - 24h/8	17.84	34.45
180914 2 9 24h Par6.lif - 24h/8:0423-0225-0335:c:3/4 z:106/133 - 24h/8	60.82	38.5	4.93268	0.796936
180914 2 9 24h Par6.lif - 24h/8:0423-0225-0324:c:3/4 z:106/133 - 24h/8	27.48	44.48
180914 2 9 24h Par6.lif - 24h/8:0423-0280-0342:c:3/4 z:106/133 - 24h/8	12.33	48.31
180914 2 9 24h Par6.lif - 24h/8:0423-0324-0374:c:3/4 z:106/133 - 24h/8	37.91	19.62	2.01649	0.53214
180914 2 9 24h Par6.lif - 24h/8:0423-0338-0361:c:3/4 z:106/133 - 24h/8	22.92	27.13
180914 2 9 24h Par6.lif - 24h/8:0423-0355-0338:c:3/4 z:106/133 - 24h/8	18.8	36.87
180914 2 9 24h Par6.lif - 24h/8:0423-0393-0342:c:3/4 z:106/133 - 24h/8	52.03	48	2.76021	1.4218
180914 2 9 24h Par6.lif - 24h/8:0423-0380-0324:c:3/4 z:106/133 - 24h/8	12.79	33.07
180914 2 9 24h Par6.lif - 24h/8:0423-0356-0339:c:3/4 z:106/133 - 24h/8	18.85	33.76
180914 2 9 24h Par6.lif - 24h/8:0423-0358-0145:c:3/4 z:106/133 - 24h/8	33.43	33.28	2.71568	0.758432
180914 2 9 24h Par6.lif - 24h/8:0423-0382-0158:c:3/4 z:106/133 - 24h/8	21.04	33.55
180914 2 9 24h Par6.lif - 24h/8:0423-0314-0176:c:3/4 z:106/133 - 24h/8	12.31	43.88
180914 2 9 24h Par6.lif - 24h/8:0423-0427-0240:c:3/4 z:106/133 - 24h/8	53.3		2.64779	#DIV/0!
180914 2 9 24h Par6.lif - 24h/8:0423-0414-0254:c:3/4 z:106/133 - 24h/8	21.91
180914 2 9 24h Par6.lif - 24h/8:0423-0392-0269:c:3/4 z:106/133 - 24h/8	20.13
180914 2 9 24h Par6.lif - 24h/8:0423-0402-0316:c:3/4 z:106/133 - 24h/8	51.84		2.1457	#DIV/0!
180914 2 9 24h Par6.lif - 24h/8:0423-0392-0313:c:3/4 z:106/133 - 24h/8	22.34
180914 2 9 24h Par6.lif - 24h/8:0423-0355-0294:c:3/4 z:106/133 - 24h/8	24.16
Embryo 7
180914 2 9 24h Par6.lif - 24h/7:0407-0102-0219:c:3/4 z:102/133 - 24h/7	49.6	62.78	1.51081	1.5095	2.37758	1.66647
180914 2 9 24h Par6.lif - 24h/7:0407-0137-0238:c:3/4 z:102/133 - 24h/7	35.59	40.04
180914 2 9 24h Par6.lif - 24h/7:0407-0150-0250:c:3/4 z:102/133 - 24h/7	32.83	41.59
180914 2 9 24h Par6.lif - 24h/7:0407-0155-0323:c:3/4 z:102/133 - 24h/7	45.85	118.99	1.96024	2.36937
180914 2 9 24h Par6.lif - 24h/7:0407-0170-0349:c:3/4 z:102/133 - 24h/7	16	58.18
180914 2 9 24h Par6.lif - 24h/7:0407-0194-0321:c:3/4 z:102/133 - 24h/7	23.39	50.22
180914 2 9 24h Par6.lif - 24h/7:0407-0283-0161:c:3/4 z:102/133 - 24h/7	71.8	129.32	3.45192	2.49268
180914 2 9 24h Par6.lif - 24h/7:0407-0259-0195:c:3/4 z:102/133 - 24h/7	20.13	54.89
180914 2 9 24h Par6.lif - 24h/7:0407-0252-0219:c:3/4 z:102/133 - 24h/7	20.8	51.88
180914 2 9 24h Par6.lif - 24h/7:0407-0343-0271:c:3/4 z:102/133 - 24h/7	29.04	74.65	1.57569	1.50869
180914 2 9 24h Par6.lif - 24h/7:0407-0343-0315:c:3/4 z:102/133 - 24h/7	13.26	56.47
180914 2 9 24h Par6.lif - 24h/7:0407-0340-0254:c:3/4 z:102/133 - 24h/7	18.43	49.48
180914 2 9 24h Par6.lif - 24h/7:0367-0246-0370:c:3/4 z:93/133 - 24h/7	98.41	117.95	3.16736	1.8447
180914 2 9 24h Par6.lif - 24h/7:0367-0268-0354:c:3/4 z:93/133 - 24h/7	31.44	52.21
180914 2 9 24h Par6.lif - 24h/7:0367-0192-0320:c:3/4 z:93/133 - 24h/7	31.07	63.94
180914 2 9 24h Par6.lif - 24h/7:0367-0257-0169:c:3/4 z:93/133 - 24h/7	71.64	39.43	2.59942	0.774656
180914 2 9 24h Par6.lif - 24h/7:0367-0238-0181:c:3/4 z:93/133 - 24h/7	31.75	51.33
180914 2 9 24h Par6.lif - 24h/7:0367-0208-0205:c:3/4 z:93/133 - 24h/7	27.56	50.9
apical		60.23		1.16567
cytoplasm		51.02
basal		51.67
Embryo 6
180914 2 9 24h Par6.lif - 24h/6:0347-0187-0195:c:3/4 z:86/133 - 24h/6	40.93	55.13	3.10782		3.07133	3.54959
180914 2 9 24h Par6.lif - 24h/6:0347-0191-0204:c:3/4 z:86/133 - 24h/6	11.68	34.69
180914 2 9 24h Par6.lif - 24h/6:0347-0209-0232:c:3/4 z:86/133 - 24h/6	13.17	43.17
180914 2 9 24h Par6.lif - 24h/6:0367-0190-0275:c:3/4 z:96/133 - 24h/6	29.66	24.36	2.60404
180914 2 9 24h Par6.lif - 24h/6:0367-0204-0291:c:3/4 z:96/133 - 24h/6	10.45	22.6
180914 2 9 24h Par6.lif - 24h/6:0367-0221-0274:c:3/4 z:96/133 - 24h/6	11.39	52.48
180914 2 9 24h Par6.lif - 24h/6:0367-0268-0153:c:3/4 z:96/133 - 24h/6	46.35	24.65	2.32447
180914 2 9 24h Par6.lif - 24h/6:0367-0274-0162:c:3/4 z:96/133 - 24h/6	8.87	26.38
180914 2 9 24h Par6.lif - 24h/6:0367-0250-0182:c:3/4 z:96/133 - 24h/6	19.94	50.65
180914 2 9 24h Par6.lif - 24h/6:0367-0369-0154:c:3/4 z:96/133 - 24h/6	24.33	23.57	1.02184
180914 2 9 24h Par6.lif - 24h/6:0367-0385-0150:c:3/4 z:96/133 - 24h/6	12.63	21.93
180914 2 9 24h Par6.lif - 24h/6:0367-0349-0179:c:3/4 z:96/133 - 24h/6	23.81	77.84		3.70504
180914 2 9 24h Par6.lif - 24h/6:0367-0428-0235:c:3/4 z:96/133 - 24h/6	75.33	30.6	6.00239
180914 2 9 24h Par6.lif - 24h/6:0367-0418-0237:c:3/4 z:96/133 - 24h/6	11.38	40.72
180914 2 9 24h Par6.lif - 24h/6:0367-0401-0260:c:3/4 z:96/133 - 24h/6	12.55	58.29		3.39415
180914 2 9 24h Par6.lif - 24h/6:0367-0401-0295:c:3/4 z:96/133 - 24h/6	24.88	35.31	1.69022
180914 2 9 24h Par6.lif - 24h/6:0367-0396-0294:c:3/4 z:96/133 - 24h/6	9.79	41.95
180914 2 9 24h Par6.lif - 24h/6:0367-0372-0295:c:3/4 z:96/133 - 24h/6	14.72
180914 2 9 24h Par6.lif - 24h/6:0427-0192-0189:c:3/4 z:106/133 - 24h/6	39.65		4.7485
180914 2 9 24h Par6.lif - 24h/6:0427-0203-0193:c:3/4 z:106/133 - 24h/6	6.01
180914 2 9 24h Par6.lif - 24h/6:0427-0214-0223:c:3/4 z:106/133 - 24h/6	8.35
Embryo 4
180914 2 9 24h Par6.lif - 24h/4:0423-0265-0124:c:3/4 z:106/133 - 24h/4	39.8	69.36	2.90299	1.53928	3.97129	1.72424
180914 2 9 24h Par6.lif - 24h/4:0423-0278-0146:c:3/4 z:106/133 - 24h/4	32.33	29.73
180914 2 9 24h Par6.lif - 24h/4:0423-0235-0170:c:3/4 z:106/133 - 24h/4	13.71	45.06
180914 2 9 24h Par6.lif - 24h/4:0423-0189-0153:c:3/4 z:106/133 - 24h/4	60.79	77.9	2.28534	2.65146
180914 2 9 24h Par6.lif - 24h/4:0423-0187-0170:c:3/4 z:106/133 - 24h/4	43.02	35.15
180914 2 9 24h Par6.lif - 24h/4:0423-0163-0207:c:3/4 z:106/133 - 24h/4	26.6	29.38
180914 2 9 24h Par6.lif - 24h/4:0383-0155-0209:c:3/4 z:95/133 - 24h/4	36.47	54.77	5.30859	1.9157
180914 2 9 24h Par6.lif - 24h/4:0383-0152-0220:c:3/4 z:95/133 - 24h/4	17.95	29.14
180914 2 9 24h Par6.lif - 24h/4:0383-0153-0275:c:3/4 z:95/133 - 24h/4	6.87	28.59
180914 2 9 24h Par6.lif - 24h/4:0383-0130-0305:c:3/4 z:95/133 - 24h/4	9.91	78.26	1.59839	1.77501
180914 2 9 24h Par6.lif - 24h/4:0383-0144-0309:c:3/4 z:95/133 - 24h/4	19.34	36.61
180914 2 9 24h Par6.lif - 24h/4:0383-0153-0272:c:3/4 z:95/133 - 24h/4	6.2	44.09
180914 2 9 24h Par6.lif - 24h/4:0383-0183-0344:c:3/4 z:95/133 - 24h/4	14.4	44.04	0.799556	1.29112
180914 2 9 24h Par6.lif - 24h/4:0383-0197-0368:c:3/4 z:95/133 - 24h/4	11.38	25.23
180914 2 9 24h Par6.lif - 24h/4:0383-0269-0350:c:3/4 z:95/133 - 24h/4	18.01	34.11
180914 2 9 24h Par6.lif - 24h/4:0383-0327-0333:c:3/4 z:95/133 - 24h/4	48.24	46.54	9.10189	1.17288
180914 2 9 24h Par6.lif - 24h/4:0383-0327-0336:c:3/4 z:95/133 - 24h/4	11.5	34.42
180914 2 9 24h Par6.lif - 24h/4:0383-0321-0286:c:3/4 z:95/133 - 24h/4	5.3	39.68
180914 2 9 24h Par6.lif - 24h/4:0383-0354-0194:c:3/4 z:95/133 - 24h/4	36.15		3.53372
180914 2 9 24h Par6.lif - 24h/4:0383-0363-0205:c:3/4 z:95/133 - 24h/4	10.36
180914 2 9 24h Par6.lif - 24h/4:0383-0340-0239:c:3/4 z:95/133 - 24h/4	10.23
180914 2 9 24h Par6.lif - 24h/4:0383-0368-0273:c:3/4 z:95/133 - 24h/4	53.85		6.23986
180914 2 9 24h Par6.lif - 24h/4:0383-0363-0266:c:3/4 z:95/133 - 24h/4	17.6
180914 2 9 24h Par6.lif - 24h/4:0383-0332-0241:c:3/4 z:95/133 - 24h/4	8.63
Embryo 87
20181227 c1 phalloidin c2 pard6 c3 gata3.lif - control inhibitor/87:0193-0207-0616:c:3/5 z:39/71 - control inhibitor/87	36.47	40.85	1.77729	1.52825	1.70485	1.35802
20181227 c1 phalloidin c2 pard6 c3 gata3.lif - control inhibitor/87:0193-0206-0585:c:3/5 z:39/71 - control inhibitor/87	20.31	26.07
20181227 c1 phalloidin c2 pard6 c3 gata3.lif - control inhibitor/87:0193-0178-0516:c:3/5 z:39/71 - control inhibitor/87	20.52	26.73
20181227 c1 phalloidin c2 pard6 c3 gata3.lif - control inhibitor/87:0193-0178-0394:c:3/5 z:39/71 - control inhibitor/87	35.69	39.62	2.52048	1.17811
20181227 c1 phalloidin c2 pard6 c3 gata3.lif - control inhibitor/87:0193-0177-0481:c:3/5 z:39/71 - control inhibitor/87	15.29	31.5
20181227 c1 phalloidin c2 pard6 c3 gata3.lif - control inhibitor/87:0193-0183-0507:c:3/5 z:39/71 - control inhibitor/87	14.16	33.63
20181227 c1 phalloidin c2 pard6 c3 gata3.lif - control inhibitor/87:0193-0361-0720:c:3/5 z:39/71 - control inhibitor/87	45.51	36.69	2.07335	1.33418
20181227 c1 phalloidin c2 pard6 c3 gata3.lif - control inhibitor/87:0193-0380-0633:c:3/5 z:39/71 - control inhibitor/87	22.92	28.47
20181227 c1 phalloidin c2 pard6 c3 gata3.lif - control inhibitor/87:0193-0286-0614:c:3/5 z:39/71 - control inhibitor/87	21.95	27.5
20181227 c1 phalloidin c2 pard6 c3 gata3.lif - control inhibitor/87:0193-0619-0550:c:3/5 z:39/71 - control inhibitor/87	47.83	30.7	1.3054	1.20439
20181227 c1 phalloidin c2 pard6 c3 gata3.lif - control inhibitor/87:0193-0604-0584:c:3/5 z:39/71 - control inhibitor/87	26.67	20.79
20181227 c1 phalloidin c2 pard6 c3 gata3.lif - control inhibitor/87:0193-0613-0420:c:3/5 z:39/71 - control inhibitor/87	36.64	25.49
20181227 c1 phalloidin c2 pard6 c3 gata3.lif - control inhibitor/87:0193-0607-0329:c:3/5 z:39/71 - control inhibitor/87	46.02	48.15	0.95955	1.84553
20181227 c1 phalloidin c2 pard6 c3 gata3.lif - control inhibitor/87:0193-0571-0271:c:3/5 z:39/71 - control inhibitor/87	26.25	24.98
20181227 c1 phalloidin c2 pard6 c3 gata3.lif - control inhibitor/87:0193-0508-0265:c:3/5 z:39/71 - control inhibitor/87	47.96	26.09
20181227 c1 phalloidin c2 pard6 c3 gata3.lif - control inhibitor/87:0193-0400-0233:c:3/5 z:39/71 - control inhibitor/87	38.36	38.21	1.59302	1.0852
20181227 c1 phalloidin c2 pard6 c3 gata3.lif - control inhibitor/87:0193-0380-0225:c:3/5 z:39/71 - control inhibitor/87	31.86	27.59
20181227 c1 phalloidin c2 pard6 c3 gata3.lif - control inhibitor/87:0193-0309-0318:c:3/5 z:39/71 - control inhibitor/87	24.08	35.21
apical		41.47		1.33045
cytoplasm		30.5
basal		31.17
Embryo 84
20181227 c1 phalloidin c2 pard6 c3 gata3.lif - control inhibitor/84:0208-0272-0368:c:3/5 z:42/73 - control inhibitor/84	45.57	22.63	1.05657	0.842831	1.19869	0.923733
20181227 c1 phalloidin c2 pard6 c3 gata3.lif - control inhibitor/84:0208-0266-0339:c:3/5 z:42/73 - control inhibitor/84	44.35	25.82
20181227 c1 phalloidin c2 pard6 c3 gata3.lif - control inhibitor/84:0208-0369-0386:c:3/5 z:42/73 - control inhibitor/84	43.13	26.85
20181227 c1 phalloidin c2 pard6 c3 gata3.lif - control inhibitor/84:0143-0292-0578:c:3/5 z:29/73 - control inhibitor/84	57.87	22.93	1.3871
20181227 c1 phalloidin c2 pard6 c3 gata3.lif - control inhibitor/84:0143-0304-0569:c:3/5 z:29/73 - control inhibitor/84	33.24	23.39
20181227 c1 phalloidin c2 pard6 c3 gata3.lif - control inhibitor/84:0143-0391-0524:c:3/5 z:29/73 - control inhibitor/84	41.72	18.42
20181227 c1 phalloidin c2 pard6 c3 gata3.lif - control inhibitor/84:0173-0482-0675:c:3/5 z:35/73 - control inhibitor/84	48.32	15.75	1.57138
20181227 c1 phalloidin c2 pard6 c3 gata3.lif - control inhibitor/84:0173-0488-0661:c:3/5 z:35/73 - control inhibitor/84	36.29	18.98
20181227 c1 phalloidin c2 pard6 c3 gata3.lif - control inhibitor/84:0173-0508-0482:c:3/5 z:35/73 - control inhibitor/84	30.75	24.71
20181227 c1 phalloidin c2 pard6 c3 gata3.lif - control inhibitor/84:0113-0744-0514:c:3/5 z:23/73 - control inhibitor/84	44.17	17.59	0.799168
20181227 c1 phalloidin c2 pard6 c3 gata3.lif - control inhibitor/84:0113-0741-0509:c:3/5 z:23/73 - control inhibitor/84	41.46	21.67		1.00464
20181227 c1 phalloidin c2 pard6 c3 gata3.lif - control inhibitor/84:0113-0652-0538:c:3/5 z:23/73 - control inhibitor/84	55.27	27.89
20181227 c1 phalloidin c2 pard6 c3 gata3.lif - control inhibitor/84:0073-0633-0306:c:3/5 z:16/73 - control inhibitor/84	57.58	21.57	1.13503
20181227 c1 phalloidin c2 pard6 c3 gata3.lif - control inhibitor/84:0073-0635-0316:c:3/5 z:16/73 - control inhibitor/84	35.13
20181227 c1 phalloidin c2 pard6 c3 gata3.lif - control inhibitor/84:0073-0533-0344:c:3/5 z:16/73 - control inhibitor/84	50.73
20181227 c1 phalloidin c2 pard6 c3 gata3.lif - control inhibitor/84:0118-0472-0288:c:3/5 z:25/73 - control inhibitor/84	47.49		1.24287
20181227 c1 phalloidin c2 pard6 c3 gata3.lif - control inhibitor/84:0118-0479-0311:c:3/5 z:25/73 - control inhibitor/84	38.06
20181227 c1 phalloidin c2 pard6 c3 gata3.lif - control inhibitor/84:0118-0492-0388:c:3/5 z:25/73 - control inhibitor/84	38.21
Embryo 81
20181227 c1 phalloidin c2 pard6 c3 gata3.lif - control inhibitor/81:0103-0512-0310:c:3/5 z:21/78 - control inhibitor/81	56.16	41.79	1.02444	1.18553	1.43672	1.1542
20181227 c1 phalloidin c2 pard6 c3 gata3.lif - control inhibitor/81:0103-0497-0397:c:3/5 z:21/78 - control inhibitor/81	41.41	37.12
20181227 c1 phalloidin c2 pard6 c3 gata3.lif - control inhibitor/81:0103-0586-0713:c:3/5 z:21/78 - control inhibitor/81	54.82	35.25
20181227 c1 phalloidin c2 pard6 c3 gata3.lif - control inhibitor/81:0103-0562-0687:c:3/5 z:21/78 - control inhibitor/81	69.94	45.85	1.49317	1.28865
20181227 c1 phalloidin c2 pard6 c3 gata3.lif - control inhibitor/81:0103-0606-0608:c:3/5 z:21/78 - control inhibitor/81	36.19	38.85
20181227 c1 phalloidin c2 pard6 c3 gata3.lif - control inhibitor/81:0173-0770-0463:c:3/5 z:35/78 - control inhibitor/81	46.84	35.58
20181227 c1 phalloidin c2 pard6 c3 gata3.lif - control inhibitor/81:0173-0754-0465:c:3/5 z:35/78 - control inhibitor/81	61.02	33.06	1.99477	0.860713
20181227 c1 phalloidin c2 pard6 c3 gata3.lif - control inhibitor/81:0173-0514-0455:c:3/5 z:35/78 - control inhibitor/81	30.26	32.3
20181227 c1 phalloidin c2 pard6 c3 gata3.lif - control inhibitor/81:0173-0538-0808:c:3/5 z:35/78 - control inhibitor/81	30.59	38.41
20181227 c1 phalloidin c2 pard6 c3 gata3.lif - control inhibitor/81:0173-0500-0776:c:3/5 z:35/78 - control inhibitor/81	31.33	36.77	1.07923	1.22403
20181227 c1 phalloidin c2 pard6 c3 gata3.lif - control inhibitor/81:0173-0395-0764:c:3/5 z:35/78 - control inhibitor/81	22.21	20.54
20181227 c1 phalloidin c2 pard6 c3 gata3.lif - control inhibitor/81:0208-0275-0681:c:3/5 z:40/78 - control inhibitor/81	29.03	30.04
20181227 c1 phalloidin c2 pard6 c3 gata3.lif - control inhibitor/81:0208-0294-0728:c:3/5 z:40/78 - control inhibitor/81	37.7	29.72	1.56496	1.21207
20181227 c1 phalloidin c2 pard6 c3 gata3.lif - control inhibitor/81:0208-0362-0647:c:3/5 z:40/78 - control inhibitor/81	22.6	31.12
20181227 c1 phalloidin c2 pard6 c3 gata3.lif - control inhibitor/81:0153-0214-0459:c:3/5 z:31/78 - control inhibitor/81	24.09	24.52
20181227 c1 phalloidin c2 pard6 c3 gata3.lif - control inhibitor/81:0153-0250-0426:c:3/5 z:31/78 - control inhibitor/81	57.51		1.46373
20181227 c1 phalloidin c2 pard6 c3 gata3.lif - control inhibitor/81:0153-0338-0504:c:3/5 z:31/78 - control inhibitor/81	38.15
20181227 c1 phalloidin c2 pard6 c3 gata3.lif - control inhibitor/81:0153-0338-0504:c:3/5 z:31/78 - control inhibitor/81	39.29
Embryo 80
20181227 c1 phalloidin c2 pard6 c3 gata3.lif - control inhibitor/80:0198-0566-0268:c:3/5 z:40/71 - control inhibitor/80	53.92	32.59	2.45091	1.26122	1.7704	1.17576
20181227 c1 phalloidin c2 pard6 c3 gata3.lif - control inhibitor/80:0198-0561-0322:c:3/5 z:40/71 - control inhibitor/80	19.35	21.29
20181227 c1 phalloidin c2 pard6 c3 gata3.lif - control inhibitor/80:0198-0589-0339:c:3/5 z:40/71 - control inhibitor/80	22	25.84
20181227 c1 phalloidin c2 pard6 c3 gata3.lif - control inhibitor/80:0153-0370-0405:c:3/5 z:31/71 - control inhibitor/80	39.92	27.45	1.75473	1.38009
20181227 c1 phalloidin c2 pard6 c3 gata3.lif - control inhibitor/80:0153-0363-0383:c:3/5 z:31/71 - control inhibitor/80	19.31	27.32
20181227 c1 phalloidin c2 pard6 c3 gata3.lif - control inhibitor/80:0153-0395-0412:c:3/5 z:31/71 - control inhibitor/80	22.75	19.89
20181227 c1 phalloidin c2 pard6 c3 gata3.lif - control inhibitor/80:0153-0538-0749:c:3/5 z:31/71 - control inhibitor/80	43.22	25.64	1.74909	1.11044
20181227 c1 phalloidin c2 pard6 c3 gata3.lif - control inhibitor/80:0153-0523-0724:c:3/5 z:31/71 - control inhibitor/80	23.38	19.22
20181227 c1 phalloidin c2 pard6 c3 gata3.lif - control inhibitor/80:0153-0470-0597:c:3/5 z:31/71 - control inhibitor/80	24.71	23.09
20181227 c1 phalloidin c2 pard6 c3 gata3.lif - control inhibitor/80:0098-0734-0591:c:3/5 z:19/71 - control inhibitor/80	44.85	23.19	1.64829	0.976421
20181227 c1 phalloidin c2 pard6 c3 gata3.lif - control inhibitor/80:0098-0701-0600:c:3/5 z:19/71 - control inhibitor/80	37.8	20.64
20181227 c1 phalloidin c2 pard6 c3 gata3.lif - control inhibitor/80:0098-0704-0489:c:3/5 z:19/71 - control inhibitor/80	27.21	23.75
20181227 c1 phalloidin c2 pard6 c3 gata3.lif - control inhibitor/80:0238-0338-0444:c:3/5 z:51/71 - control inhibitor/80	27.01	27.27	1.41785	1.15063
20181227 c1 phalloidin c2 pard6 c3 gata3.lif - control inhibitor/80:0238-0333-0418:c:3/5 z:51/71 - control inhibitor/80	9.25	20.02
20181227 c1 phalloidin c2 pard6 c3 gata3.lif - control inhibitor/80:0238-0415-0448:c:3/5 z:51/71 - control inhibitor/80	19.05	23.7
20181227 c1 phalloidin c2 pard6 c3 gata3.lif - control inhibitor/80:0253-0529-0320:c:3/5 z:51/71 - control inhibitor/80	35.33		1.60154
20181227 c1 phalloidin c2 pard6 c3 gata3.lif - control inhibitor/80:0253-0508-0380:c:3/5 z:51/71 - control inhibitor/80	17.24
20181227 c1 phalloidin c2 pard6 c3 gata3.lif - control inhibitor/80:0253-0414-0413:c:3/5 z:51/71 - control inhibitor/80	22.06
Embryo 79
20181227 c1 phalloidin c2 pard6 c3 gata3.lif - control inhibitor/79:0163-0524-0652:c:3/5 z:33/79 - control inhibitor/79	67.47	41.71	0.97205	1.12244	1.00618	1.21362
20181227 c1 phalloidin c2 pard6 c3 gata3.lif - control inhibitor/79:0163-0568-0678:c:3/5 z:33/79 - control inhibitor/79	45.15	40.04
20181227 c1 phalloidin c2 pard6 c3 gata3.lif - control inhibitor/79:0163-0499-0551:c:3/5 z:33/79 - control inhibitor/79	69.41	37.16
20181227 c1 phalloidin c2 pard6 c3 gata3.lif - control inhibitor/79:0183-0259-0604:c:3/5 z:37/79 - control inhibitor/79	38.94	47.36	0.911944	1.42866
20181227 c1 phalloidin c2 pard6 c3 gata3.lif - control inhibitor/79:0183-0275-0647:c:3/5 z:37/79 - control inhibitor/79	31.61	42.58
20181227 c1 phalloidin c2 pard6 c3 gata3.lif - control inhibitor/79:0183-0347-0577:c:3/5 z:37/79 - control inhibitor/79	42.7	33.15
20181227 c1 phalloidin c2 pard6 c3 gata3.lif - control inhibitor/79:0123-0315-0443:c:3/5 z:23/79 - control inhibitor/79	37.36	42.19	0.757348	0.906143
20181227 c1 phalloidin c2 pard6 c3 gata3.lif - control inhibitor/79:0123-0315-0432:c:3/5 z:23/79 - control inhibitor/79	49.02	41.84
20181227 c1 phalloidin c2 pard6 c3 gata3.lif - control inhibitor/79:0123-0365-0479:c:3/5 z:23/79 - control inhibitor/79	49.33	46.56
20181227 c1 phalloidin c2 pard6 c3 gata3.lif - control inhibitor/79:0193-0256-0597:c:3/5 z:39/79 - control inhibitor/79	42.51	38.07	1.15047	1.04016
20181227 c1 phalloidin c2 pard6 c3 gata3.lif - control inhibitor/79:0193-0273-0630:c:3/5 z:39/79 - control inhibitor/79	45.93	40.81
20181227 c1 phalloidin c2 pard6 c3 gata3.lif - control inhibitor/79:0193-0354-0581:c:3/5 z:39/79 - control inhibitor/79	36.95	36.6
20181227 c1 phalloidin c2 pard6 c3 gata3.lif - control inhibitor/79:0143-0307-0427:c:3/5 z:29/79 - control inhibitor/79	67.88	52.79	1.21388	1.5891
20181227 c1 phalloidin c2 pard6 c3 gata3.lif - control inhibitor/79:0143-0304-0436:c:3/5 z:29/79 - control inhibitor/79	50.24	32.97
20181227 c1 phalloidin c2 pard6 c3 gata3.lif - control inhibitor/79:0143-0329-0471:c:3/5 z:29/79 - control inhibitor/79	55.92	33.22
20181227 c1 phalloidin c2 pard6 c3 gata3.lif - control inhibitor/79:0143-0489-0275:c:3/5 z:29/79 - control inhibitor/79	69.03	25.18	1.03138	0.942718
20181227 c1 phalloidin c2 pard6 c3 gata3.lif - control inhibitor/79:0143-0494-0267:c:3/5 z:29/79 - control inhibitor/79	48.86	24.57
20181227 c1 phalloidin c2 pard6 c3 gata3.lif - control inhibitor/79:0143-0492-0389:c:3/5 z:29/79 - control inhibitor/79	66.93	26.71
apical		35.9		1.53157
cytoplasm		22.16
basal		23.44
apical		31		1.14815
cytoplasm		21.24
basal		27
Embryo 78
20181227 c1 phalloidin c2 pard6 c3 gata3.lif - control inhibitor/77:0183-0550-0219:c:3/5 z:37/79 - control inhibitor/77	34.18	15.35	1.58977	0.711307	1.26653	0.905556
20181227 c1 phalloidin c2 pard6 c3 gata3.lif - control inhibitor/77:0183-0551-0227:c:3/5 z:37/79 - control inhibitor/77	17.56	17.59
20181227 c1 phalloidin c2 pard6 c3 gata3.lif - control inhibitor/77:0183-0545-0335:c:3/5 z:37/79 - control inhibitor/77	21.5	21.58
20181227 c1 phalloidin c2 pard6 c3 gata3.lif - control inhibitor/77:0183-0702-0346:c:3/5 z:37/79 - control inhibitor/77	21.61	19.46	1.16622	0.836989
20181227 c1 phalloidin c2 pard6 c3 gata3.lif - control inhibitor/77:0183-0661-0410:c:3/5 z:37/79 - control inhibitor/77	15.05	22.05
20181227 c1 phalloidin c2 pard6 c3 gata3.lif - control inhibitor/77:0183-0636-0468:c:3/5 z:37/79 - control inhibitor/77	18.53	23.25
20181227 c1 phalloidin c2 pard6 c3 gata3.lif - control inhibitor/77:0133-0707-0503:c:3/5 z:27/79 - control inhibitor/77	33.54	14.77	1.84387	1.02784
20181227 c1 phalloidin c2 pard6 c3 gata3.lif - control inhibitor/77:0133-0670-0537:c:3/5 z:27/79 - control inhibitor/77	9.74	15.85
20181227 c1 phalloidin c2 pard6 c3 gata3.lif - control inhibitor/77:0133-0572-0598:c:3/5 z:27/79 - control inhibitor/77	18.19	14.37
20181227 c1 phalloidin c2 pard6 c3 gata3.lif - control inhibitor/77:0173-0544-0711:c:3/5 z:35/79 - control inhibitor/77	18.65	8.5	0.84009	0.628234
20181227 c1 phalloidin c2 pard6 c3 gata3.lif - control inhibitor/77:0173-0549-0669:c:3/5 z:35/79 - control inhibitor/77	13.6	13.5
20181227 c1 phalloidin c2 pard6 c3 gata3.lif - control inhibitor/77:0173-0599-0597:c:3/5 z:35/79 - control inhibitor/77	22.2	13.53
20181227 c1 phalloidin c2 pard6 c3 gata3.lif - control inhibitor/77:0103-0430-0360:c:3/5 z:21/79 - control inhibitor/77	34.44	20.46	0.892691	1.32342
20181227 c1 phalloidin c2 pard6 c3 gata3.lif - control inhibitor/77:0103-0435-0397:c:3/5 z:21/79 - control inhibitor/77	23.36	19.98
20181227 c1 phalloidin c2 pard6 c3 gata3.lif - control inhibitor/77:0103-0510-0443:c:3/5 z:21/79 - control inhibitor/77	38.58	15.46
Embryo 118
190406 Ctrl DMSO Inhibitor C1 DAPI C2 BF C3 Factin C4 Gata3 C5 Pard6.lif - ctrl/rescan control/118 rescan:0183-0355-0253:c:3/5 z:37/61 - ctrl/rescan control/118 rescan	18.82	45.99	2.16571	1.67419	2.36991	1.72854
190406 Ctrl DMSO Inhibitor C1 DAPI C2 BF C3 Factin C4 Gata3 C5 Pard6.lif - ctrl/rescan control/118 rescan:0183-0361-0247:c:3/5 z:37/61 - ctrl/rescan control/118 rescan	10.65	25.51
190406 Ctrl DMSO Inhibitor C1 DAPI C2 BF C3 Factin C4 Gata3 C5 Pard6.lif - ctrl/rescan control/118 rescan:0183-0379-0292:c:3/5 z:37/61 - ctrl/rescan control/118 rescan	8.69	27.47
190406 Ctrl DMSO Inhibitor C1 DAPI C2 BF C3 Factin C4 Gata3 C5 Pard6.lif - ctrl/rescan control/118 rescan:0183-0252-0450:c:3/5 z:37/61 - ctrl/rescan control/118 rescan	31.61	52.9	2.14305	1.8653
190406 Ctrl DMSO Inhibitor C1 DAPI C2 BF C3 Factin C4 Gata3 C5 Pard6.lif - ctrl/rescan control/118 rescan:0183-0292-0447:c:3/5 z:37/61 - ctrl/rescan control/118 rescan	7.58	23.6
190406 Ctrl DMSO Inhibitor C1 DAPI C2 BF C3 Factin C4 Gata3 C5 Pard6.lif - ctrl/rescan control/118 rescan:0183-0342-0509:c:3/5 z:37/61 - ctrl/rescan control/118 rescan	14.75	28.36
190406 Ctrl DMSO Inhibitor C1 DAPI C2 BF C3 Factin C4 Gata3 C5 Pard6.lif - ctrl/rescan control/118 rescan:0183-0293-0554:c:3/5 z:37/61 - ctrl/rescan control/118 rescan	63.45	56.43	4.57462	2.19657
190406 Ctrl DMSO Inhibitor C1 DAPI C2 BF C3 Factin C4 Gata3 C5 Pard6.lif - ctrl/rescan control/118 rescan:0183-0329-0544:c:3/5 z:37/61 - ctrl/rescan control/118 rescan	17.03	26.21
190406 Ctrl DMSO Inhibitor C1 DAPI C2 BF C3 Factin C4 Gata3 C5 Pard6.lif - ctrl/rescan control/118 rescan:0183-0338-0518:c:3/5 z:37/61 - ctrl/rescan control/118 rescan	13.87	25.69
190406 Ctrl DMSO Inhibitor C1 DAPI C2 BF C3 Factin C4 Gata3 C5 Pard6.lif - ctrl/rescan control/118 rescan:0183-0438-0732:c:3/5 z:37/61 - ctrl/rescan control/118 rescan	25.85	31.33	2.43638	1.40367
190406 Ctrl DMSO Inhibitor C1 DAPI C2 BF C3 Factin C4 Gata3 C5 Pard6.lif - ctrl/rescan control/118 rescan:0183-0474-0761:c:3/5 z:37/61 - ctrl/rescan control/118 rescan	11.22	22.38
190406 Ctrl DMSO Inhibitor C1 DAPI C2 BF C3 Factin C4 Gata3 C5 Pard6.lif - ctrl/rescan control/118 rescan:0183-0527-0696:c:3/5 z:37/61 - ctrl/rescan control/118 rescan	10.61	22.32
190406 Ctrl DMSO Inhibitor C1 DAPI C2 BF C3 Factin C4 Gata3 C5 Pard6.lif - ctrl/rescan control/118 rescan:0183-0782-0648:c:3/5 z:37/61 - ctrl/rescan control/118 rescan	13.58	32.27	1.18603	1.43104
190406 Ctrl DMSO Inhibitor C1 DAPI C2 BF C3 Factin C4 Gata3 C5 Pard6.lif - ctrl/rescan control/118 rescan:0183-0762-0664:c:3/5 z:37/61 - ctrl/rescan control/118 rescan	8.39	21.69
190406 Ctrl DMSO Inhibitor C1 DAPI C2 BF C3 Factin C4 Gata3 C5 Pard6.lif - ctrl/rescan control/118 rescan:0183-0798-0519:c:3/5 z:37/61 - ctrl/rescan control/118 rescan	11.45	22.55
190406 Ctrl DMSO Inhibitor C1 DAPI C2 BF C3 Factin C4 Gata3 C5 Pard6.lif - ctrl/rescan control/118 rescan:0183-0695-0254:c:3/5 z:37/61 - ctrl/rescan control/118 rescan	27.71	33.63	1.71367	1.37602
190406 Ctrl DMSO Inhibitor C1 DAPI C2 BF C3 Factin C4 Gata3 C5 Pard6.lif - ctrl/rescan control/118 rescan:0183-0700-0280:c:3/5 z:37/61 - ctrl/rescan control/118 rescan	8	22.09
190406 Ctrl DMSO Inhibitor C1 DAPI C2 BF C3 Factin C4 Gata3 C5 Pard6.lif - ctrl/rescan control/118 rescan:0183-0695-0325:c:3/5 z:37/61 - ctrl/rescan control/118 rescan	16.17	24.44
apical		60.93		2.153
cytoplasm		30.13
basal		28.3
Embryo 115
190406 Ctrl DMSO Inhibitor C1 DAPI C2 BF C3 Factin C4 Gata3 C5 Pard6.lif - ctrl/rescan control/115 rescan:0158-0186-0351:c:3/5 z:32/67 - ctrl/rescan control/115 rescan	25.07	53.53	1.9881	1.82199	2.5649	1.83142
190406 Ctrl DMSO Inhibitor C1 DAPI C2 BF C3 Factin C4 Gata3 C5 Pard6.lif - ctrl/rescan control/115 rescan:0158-0217-0361:c:3/5 z:32/67 - ctrl/rescan control/115 rescan	9.36	25.06
190406 Ctrl DMSO Inhibitor C1 DAPI C2 BF C3 Factin C4 Gata3 C5 Pard6.lif - ctrl/rescan control/115 rescan:0158-0263-0334:c:3/5 z:32/67 - ctrl/rescan control/115 rescan	12.61	29.38
190406 Ctrl DMSO Inhibitor C1 DAPI C2 BF C3 Factin C4 Gata3 C5 Pard6.lif - ctrl/rescan control/115 rescan:0158-0255-0249:c:3/5 z:32/67 - ctrl/rescan control/115 rescan	27.65	57.17	2.31963	1.68544
190406 Ctrl DMSO Inhibitor C1 DAPI C2 BF C3 Factin C4 Gata3 C5 Pard6.lif - ctrl/rescan control/115 rescan:0158-0316-0242:c:3/5 z:32/67 - ctrl/rescan control/115 rescan	10.85	33.23
190406 Ctrl DMSO Inhibitor C1 DAPI C2 BF C3 Factin C4 Gata3 C5 Pard6.lif - ctrl/rescan control/115 rescan:0158-0263-0334:c:3/5 z:32/67 - ctrl/rescan control/115 rescan	11.92	33.92
190406 Ctrl DMSO Inhibitor C1 DAPI C2 BF C3 Factin C4 Gata3 C5 Pard6.lif - ctrl/rescan control/115 rescan:0158-0487-0236:c:3/5 z:32/67 - ctrl/rescan control/115 rescan	22.44	62.48	1.5307	1.87403
190406 Ctrl DMSO Inhibitor C1 DAPI C2 BF C3 Factin C4 Gata3 C5 Pard6.lif - ctrl/rescan control/115 rescan:0158-0504-0278:c:3/5 z:32/67 - ctrl/rescan control/115 rescan	8.63	24.18
190406 Ctrl DMSO Inhibitor C1 DAPI C2 BF C3 Factin C4 Gata3 C5 Pard6.lif - ctrl/rescan control/115 rescan:0158-0395-0272:c:3/5 z:32/67 - ctrl/rescan control/115 rescan	14.66	33.34
190406 Ctrl DMSO Inhibitor C1 DAPI C2 BF C3 Factin C4 Gata3 C5 Pard6.lif - ctrl/rescan control/115 rescan:0158-0625-0319:c:3/5 z:32/67 - ctrl/rescan control/115 rescan	75.48	47.71	4.57455	1.70759
190406 Ctrl DMSO Inhibitor C1 DAPI C2 BF C3 Factin C4 Gata3 C5 Pard6.lif - ctrl/rescan control/115 rescan:0158-0567-0361:c:3/5 z:32/67 - ctrl/rescan control/115 rescan	10.85	25.33
190406 Ctrl DMSO Inhibitor C1 DAPI C2 BF C3 Factin C4 Gata3 C5 Pard6.lif - ctrl/rescan control/115 rescan:0158-0535-0315:c:3/5 z:32/67 - ctrl/rescan control/115 rescan	16.5	27.94
190406 Ctrl DMSO Inhibitor C1 DAPI C2 BF C3 Factin C4 Gata3 C5 Pard6.lif - ctrl/rescan control/115 rescan:0158-0653-0666:c:3/5 z:32/67 - ctrl/rescan control/115 rescan	37.28	47.53	3.2055	2.46014
190406 Ctrl DMSO Inhibitor C1 DAPI C2 BF C3 Factin C4 Gata3 C5 Pard6.lif - ctrl/rescan control/115 rescan:0158-0649-0647:c:3/5 z:32/67 - ctrl/rescan control/115 rescan	10.64	28.36
190406 Ctrl DMSO Inhibitor C1 DAPI C2 BF C3 Factin C4 Gata3 C5 Pard6.lif - ctrl/rescan control/115 rescan:0158-0558-0712:c:3/5 z:32/67 - ctrl/rescan control/115 rescan	11.63	19.32
190406 Ctrl DMSO Inhibitor C1 DAPI C2 BF C3 Factin C4 Gata3 C5 Pard6.lif - ctrl/rescan control/115 rescan:0158-0568-0768:c:3/5 z:32/67 - ctrl/rescan control/115 rescan	21.8	42.78	1.77092	1.72918
190406 Ctrl DMSO Inhibitor C1 DAPI C2 BF C3 Factin C4 Gata3 C5 Pard6.lif - ctrl/rescan control/115 rescan:0158-0532-0765:c:3/5 z:32/67 - ctrl/rescan control/115 rescan	10.51	21.59
190406 Ctrl DMSO Inhibitor C1 DAPI C2 BF C3 Factin C4 Gata3 C5 Pard6.lif - ctrl/rescan control/115 rescan:0158-0554-0714:c:3/5 z:32/67 - ctrl/rescan control/115 rescan	12.31	24.74
apical		38.92		2.06801
cytoplasm		19.85
basal		18.82
apical		27.77		1.30498
cytoplasm		19.38
basal		21.28
Embryo 113
190406 Ctrl DMSO Inhibitor C1 DAPI C2 BF C3 Factin C4 Gata3 C5 Pard6.lif - ctrl/rescan control/113 rescan:0148-0157-0552:c:3/5 z:31/67 - ctrl/rescan control/113 rescan	25.97	60.53	1.40835	1.24215	1.30866	1.49799
190406 Ctrl DMSO Inhibitor C1 DAPI C2 BF C3 Factin C4 Gata3 C5 Pard6.lif - ctrl/rescan control/113 rescan:0148-0171-0591:c:3/5 z:31/67 - ctrl/rescan control/113 rescan	14.76	39.34
190406 Ctrl DMSO Inhibitor C1 DAPI C2 BF C3 Factin C4 Gata3 C5 Pard6.lif - ctrl/rescan control/113 rescan:0148-0197-0458:c:3/5 z:31/67 - ctrl/rescan control/113 rescan	18.44	48.73
190406 Ctrl DMSO Inhibitor C1 DAPI C2 BF C3 Factin C4 Gata3 C5 Pard6.lif - ctrl/rescan control/113 rescan:0183-0263-0718:c:3/5 z:37/67 - ctrl/rescan control/113 rescan	21.03	64.02	0.946445	1.23734
190406 Ctrl DMSO Inhibitor C1 DAPI C2 BF C3 Factin C4 Gata3 C5 Pard6.lif - ctrl/rescan control/113 rescan:0183-0302-0751:c:3/5 z:37/67 - ctrl/rescan control/113 rescan	12.29	38.22
190406 Ctrl DMSO Inhibitor C1 DAPI C2 BF C3 Factin C4 Gata3 C5 Pard6.lif - ctrl/rescan control/113 rescan:0183-0338-0612:c:3/5 z:37/67 - ctrl/rescan control/113 rescan	22.22	51.74
190406 Ctrl DMSO Inhibitor C1 DAPI C2 BF C3 Factin C4 Gata3 C5 Pard6.lif - ctrl/rescan control/113 rescan:0183-0483-0775:c:3/5 z:37/67 - ctrl/rescan control/113 rescan	31.78	53.23	1.66475	1.44255
190406 Ctrl DMSO Inhibitor C1 DAPI C2 BF C3 Factin C4 Gata3 C5 Pard6.lif - ctrl/rescan control/113 rescan:0183-0447-0730:c:3/5 z:37/67 - ctrl/rescan control/113 rescan	9.6	29.29
190406 Ctrl DMSO Inhibitor C1 DAPI C2 BF C3 Factin C4 Gata3 C5 Pard6.lif - ctrl/rescan control/113 rescan:0183-0457-0621:c:3/5 z:37/67 - ctrl/rescan control/113 rescan	19.09	36.9
190406 Ctrl DMSO Inhibitor C1 DAPI C2 BF C3 Factin C4 Gata3 C5 Pard6.lif - ctrl/rescan control/113 rescan:0183-0708-0676:c:3/5 z:37/67 - ctrl/rescan control/113 rescan	20.31	45.56	1.16256	1.31335
190406 Ctrl DMSO Inhibitor C1 DAPI C2 BF C3 Factin C4 Gata3 C5 Pard6.lif - ctrl/rescan control/113 rescan:0183-0681-0716:c:3/5 z:37/67 - ctrl/rescan control/113 rescan	15.06	23.18
190406 Ctrl DMSO Inhibitor C1 DAPI C2 BF C3 Factin C4 Gata3 C5 Pard6.lif - ctrl/rescan control/113 rescan:0183-0583-0679:c:3/5 z:37/67 - ctrl/rescan control/113 rescan	17.47	34.69
190406 Ctrl DMSO Inhibitor C1 DAPI C2 BF C3 Factin C4 Gata3 C5 Pard6.lif - ctrl/rescan control/113 rescan:0208-0325-0294:c:3/5 z:43/67 - ctrl/rescan control/113 rescan	35.84	54.42	1.36118	1.14738
190406 Ctrl DMSO Inhibitor C1 DAPI C2 BF C3 Factin C4 Gata3 C5 Pard6.lif - ctrl/rescan control/113 rescan:0208-0328-0275:c:3/5 z:43/67 - ctrl/rescan control/113 rescan	15.48	31
190406 Ctrl DMSO Inhibitor C1 DAPI C2 BF C3 Factin C4 Gata3 C5 Pard6.lif - ctrl/rescan control/113 rescan:0208-0288-0408:c:3/5 z:43/67 - ctrl/rescan control/113 rescan	26.33	47.43
apical		45.03		1.64885
cytoplasm		29.05
basal		27.31
apical		58.2		2.36105
cytoplasm		37.4
basal		24.65
apical		26.7		1.63403
cytoplasm		13.78
basal		16.34
apical		35.45		1.45525
cytoplasm		17.39
basal		24.36
Embryo 117
190406 Ctrl DMSO Inhibitor C1 DAPI C2 BF C3 Factin C4 Gata3 C5 Pard6.lif - ctrl/117:0233-0255-0458:c:3/5 z:47/66 - ctrl/117	10.71	63.18	1.10412	2.68166	2.56116	2.36748
190406 Ctrl DMSO Inhibitor C1 DAPI C2 BF C3 Factin C4 Gata3 C5 Pard6.lif - ctrl/117:0233-0244-0410:c:3/5 z:47/66 - ctrl/117	9.44	29.95
190406 Ctrl DMSO Inhibitor C1 DAPI C2 BF C3 Factin C4 Gata3 C5 Pard6.lif - ctrl/117:0233-0314-0412:c:3/5 z:47/66 - ctrl/117	9.7	23.56
190406 Ctrl DMSO Inhibitor C1 DAPI C2 BF C3 Factin C4 Gata3 C5 Pard6.lif - ctrl/117:0233-0323-0678:c:3/5 z:47/66 - ctrl/117	16.86	52.46	2.00714	1.73021
190406 Ctrl DMSO Inhibitor C1 DAPI C2 BF C3 Factin C4 Gata3 C5 Pard6.lif - ctrl/117:0233-0339-0687:c:3/5 z:47/66 - ctrl/117	5.97	24.74
190406 Ctrl DMSO Inhibitor C1 DAPI C2 BF C3 Factin C4 Gata3 C5 Pard6.lif - ctrl/117:0233-0401-0658:c:3/5 z:47/66 - ctrl/117	8.4	30.32
190406 Ctrl DMSO Inhibitor C1 DAPI C2 BF C3 Factin C4 Gata3 C5 Pard6.lif - ctrl/117:0233-0507-0763:c:3/5 z:47/66 - ctrl/117	9.96	69.23	2.11017	3.09339
190406 Ctrl DMSO Inhibitor C1 DAPI C2 BF C3 Factin C4 Gata3 C5 Pard6.lif - ctrl/117:0233-0531-0759:c:3/5 z:47/66 - ctrl/117	7.69	27.23
190406 Ctrl DMSO Inhibitor C1 DAPI C2 BF C3 Factin C4 Gata3 C5 Pard6.lif - ctrl/117:0233-0422-0684:c:3/5 z:47/66 - ctrl/117	4.72	22.38
190406 Ctrl DMSO Inhibitor C1 DAPI C2 BF C3 Factin C4 Gata3 C5 Pard6.lif - ctrl/117:0233-0720-0560:c:3/5 z:47/66 - ctrl/117	19.56	62.1	2.55352	2.75266
190406 Ctrl DMSO Inhibitor C1 DAPI C2 BF C3 Factin C4 Gata3 C5 Pard6.lif - ctrl/117:0233-0673-0595:c:3/5 z:47/66 - ctrl/117	4.22	26.23
190406 Ctrl DMSO Inhibitor C1 DAPI C2 BF C3 Factin C4 Gata3 C5 Pard6.lif - ctrl/117:0233-0678-0464:c:3/5 z:47/66 - ctrl/117	7.66	22.56
190406 Ctrl DMSO Inhibitor C1 DAPI C2 BF C3 Factin C4 Gata3 C5 Pard6.lif - ctrl/117:0233-0708-0346:c:3/5 z:47/66 - ctrl/117	16.85	50.37	2.70032	1.57949
190406 Ctrl DMSO Inhibitor C1 DAPI C2 BF C3 Factin C4 Gata3 C5 Pard6.lif - ctrl/117:0233-0640-0308:c:3/5 z:47/66 - ctrl/117	7.79	22.18
190406 Ctrl DMSO Inhibitor C1 DAPI C2 BF C3 Factin C4 Gata3 C5 Pard6.lif - ctrl/117:0233-0579-0368:c:3/5 z:47/66 - ctrl/117	6.24	31.89
190406 Ctrl DMSO Inhibitor C1 DAPI C2 BF C3 Factin C4 Gata3 C5 Pard6.lif - ctrl/117:0198-0458-0269:c:3/5 z:40/66 - ctrl/117	41.61		5.46063
190406 Ctrl DMSO Inhibitor C1 DAPI C2 BF C3 Factin C4 Gata3 C5 Pard6.lif - ctrl/117:0198-0444-0313:c:3/5 z:40/66 - ctrl/117	10.52
190406 Ctrl DMSO Inhibitor C1 DAPI C2 BF C3 Factin C4 Gata3 C5 Pard6.lif - ctrl/117:0198-0307-0422:c:3/5 z:40/66 - ctrl/117	7.62
190406 Ctrl DMSO Inhibitor C1 DAPI C2 BF C3 Factin C4 Gata3 C5 Pard6.lif - ctrl/117:0133-0613-0506:c:3/5 z:27/66 - ctrl/117	38.35		1.99221
190406 Ctrl DMSO Inhibitor C1 DAPI C2 BF C3 Factin C4 Gata3 C5 Pard6.lif - ctrl/117:0133-0596-0547:c:3/5 z:27/66 - ctrl/117	7.26
190406 Ctrl DMSO Inhibitor C1 DAPI C2 BF C3 Factin C4 Gata3 C5 Pard6.lif - ctrl/117:0133-0517-0600:c:3/5 z:27/66 - ctrl/117	19.25
Embryo 116
190406 Ctrl DMSO Inhibitor C1 DAPI C2 BF C3 Factin C4 Gata3 C5 Pard6.lif - ctrl/116:0203-0450-0673:c:3/5 z:41/66 - ctrl/116	11.62	12.91	1.02379	0.477794	1.75839	1.69768
190406 Ctrl DMSO Inhibitor C1 DAPI C2 BF C3 Factin C4 Gata3 C5 Pard6.lif - ctrl/116:0203-0389-0697:c:3/5 z:41/66 - ctrl/116	11.04	39.43
190406 Ctrl DMSO Inhibitor C1 DAPI C2 BF C3 Factin C4 Gata3 C5 Pard6.lif - ctrl/116:0203-0546-0595:c:3/5 z:41/66 - ctrl/116	11.35	27.02
190406 Ctrl DMSO Inhibitor C1 DAPI C2 BF C3 Factin C4 Gata3 C5 Pard6.lif - ctrl/116:0203-0707-0571:c:3/5 z:41/66 - ctrl/116	17.64	71.36	2.40327	2.77342
190406 Ctrl DMSO Inhibitor C1 DAPI C2 BF C3 Factin C4 Gata3 C5 Pard6.lif - ctrl/116:0203-0720-0599:c:3/5 z:41/66 - ctrl/116	10.96	24.51
190406 Ctrl DMSO Inhibitor C1 DAPI C2 BF C3 Factin C4 Gata3 C5 Pard6.lif - ctrl/116:0203-0675-0468:c:3/5 z:41/66 - ctrl/116	7.34	25.73
190406 Ctrl DMSO Inhibitor C1 DAPI C2 BF C3 Factin C4 Gata3 C5 Pard6.lif - ctrl/116:0203-0642-0332:c:3/5 z:41/66 - ctrl/116	16.57	59.1	0.87533	3.01839
190406 Ctrl DMSO Inhibitor C1 DAPI C2 BF C3 Factin C4 Gata3 C5 Pard6.lif - ctrl/116:0203-0683-0319:c:3/5 z:41/66 - ctrl/116	13.47	24
190406 Ctrl DMSO Inhibitor C1 DAPI C2 BF C3 Factin C4 Gata3 C5 Pard6.lif - ctrl/116:0203-0516-0428:c:3/5 z:41/66 - ctrl/116	18.93	19.58
190406 Ctrl DMSO Inhibitor C1 DAPI C2 BF C3 Factin C4 Gata3 C5 Pard6.lif - ctrl/116:0153-0505-0486:c:3/5 z:31/66 - ctrl/116	21.03	26.39	2.73117	1.1677
190406 Ctrl DMSO Inhibitor C1 DAPI C2 BF C3 Factin C4 Gata3 C5 Pard6.lif - ctrl/116:0153-0551-0513:c:3/5 z:31/66 - ctrl/116	11.49	27.6
190406 Ctrl DMSO Inhibitor C1 DAPI C2 BF C3 Factin C4 Gata3 C5 Pard6.lif - ctrl/116:0153-0563-0435:c:3/5 z:31/66 - ctrl/116	7.7	22.6
apical		35.37		1.05111
cytoplasm		31.15
basal		33.65
Embryo 112
190406 Ctrl DMSO Inhibitor C1 DAPI C2 BF C3 Factin C4 Gata3 C5 Pard6.lif - ctrl/112:0243-0099-0613:c:3/5 z:48/66 - ctrl/112	14.76	60.94	1.94211	1.47447	2.86733	1.78495
190406 Ctrl DMSO Inhibitor C1 DAPI C2 BF C3 Factin C4 Gata3 C5 Pard6.lif - ctrl/112:0243-0090-0667:c:3/5 z:48/66 - ctrl/112	13.33	31
190406 Ctrl DMSO Inhibitor C1 DAPI C2 BF C3 Factin C4 Gata3 C5 Pard6.lif - ctrl/112:0243-0156-0601:c:3/5 z:48/66 - ctrl/112	7.6	41.33
190406 Ctrl DMSO Inhibitor C1 DAPI C2 BF C3 Factin C4 Gata3 C5 Pard6.lif - ctrl/112:0238-0282-0758:c:3/5 z:48/66 - ctrl/112	19.06	44.86	2.37065	1.53001
190406 Ctrl DMSO Inhibitor C1 DAPI C2 BF C3 Factin C4 Gata3 C5 Pard6.lif - ctrl/112:0238-0301-0743:c:3/5 z:48/66 - ctrl/112	5.55	26.63
190406 Ctrl DMSO Inhibitor C1 DAPI C2 BF C3 Factin C4 Gata3 C5 Pard6.lif - ctrl/112:0238-0338-0713:c:3/5 z:48/66 - ctrl/112	8.04	29.32
190406 Ctrl DMSO Inhibitor C1 DAPI C2 BF C3 Factin C4 Gata3 C5 Pard6.lif - ctrl/112:0248-0467-0670:c:3/5 z:50/66 - ctrl/112	36.99	40.19	4.44591	1.51775
190406 Ctrl DMSO Inhibitor C1 DAPI C2 BF C3 Factin C4 Gata3 C5 Pard6.lif - ctrl/112:0248-0417-0657:c:3/5 z:50/66 - ctrl/112	4.63	24.6
190406 Ctrl DMSO Inhibitor C1 DAPI C2 BF C3 Factin C4 Gata3 C5 Pard6.lif - ctrl/112:0248-0462-0609:c:3/5 z:50/66 - ctrl/112	8.32	26.48
190406 Ctrl DMSO Inhibitor C1 DAPI C2 BF C3 Factin C4 Gata3 C5 Pard6.lif - ctrl/112:0248-0256-0309:c:3/5 z:50/66 - ctrl/112	19.21	51.91	3.72287	2.05666
190406 Ctrl DMSO Inhibitor C1 DAPI C2 BF C3 Factin C4 Gata3 C5 Pard6.lif - ctrl/112:0248-0210-0347:c:3/5 z:50/66 - ctrl/112	2.45	26.36
190406 Ctrl DMSO Inhibitor C1 DAPI C2 BF C3 Factin C4 Gata3 C5 Pard6.lif - ctrl/112:0248-0186-0408:c:3/5 z:50/66 - ctrl/112	5.16	25.24
190406 Ctrl DMSO Inhibitor C1 DAPI C2 BF C3 Factin C4 Gata3 C5 Pard6.lif - ctrl/112:0208-0111-0455:c:3/5 z:42/66 - ctrl/112	34.06	66.97	1.85512	2.15546
190406 Ctrl DMSO Inhibitor C1 DAPI C2 BF C3 Factin C4 Gata3 C5 Pard6.lif - ctrl/112:0208-0145-0447:c:3/5 z:42/66 - ctrl/112	6.69	31.36
190406 Ctrl DMSO Inhibitor C1 DAPI C2 BF C3 Factin C4 Gata3 C5 Pard6.lif - ctrl/112:0208-0161-0417:c:3/5 z:42/66 - ctrl/112	18.36	31.07
apical		75.42		1.97538
cytoplasm		34.72
basal		38.18
Embryo 111
190406 Ctrl DMSO Inhibitor C1 DAPI C2 BF C3 Factin C4 Gata3 C5 Pard6.lif - ctrl/111:0208-0275-0715:c:3/5 z:42/66 - ctrl/111	21.1	46.17	2.75457	0.952155	3.88029	1.71433
190406 Ctrl DMSO Inhibitor C1 DAPI C2 BF C3 Factin C4 Gata3 C5 Pard6.lif - ctrl/111:0208-0207-0673:c:3/5 z:42/66 - ctrl/111	2.56	30.42
190406 Ctrl DMSO Inhibitor C1 DAPI C2 BF C3 Factin C4 Gata3 C5 Pard6.lif - ctrl/111:0208-0222-0624:c:3/5 z:42/66 - ctrl/111	7.66	48.49
190406 Ctrl DMSO Inhibitor C1 DAPI C2 BF C3 Factin C4 Gata3 C5 Pard6.lif - ctrl/111:0203-0140-0548:c:3/5 z:41/66 - ctrl/111	39.35	47.39	6.22627	2.28496
190406 Ctrl DMSO Inhibitor C1 DAPI C2 BF C3 Factin C4 Gata3 C5 Pard6.lif - ctrl/111:0203-0191-0558:c:3/5 z:41/66 - ctrl/111	2.19	31.84
190406 Ctrl DMSO Inhibitor C1 DAPI C2 BF C3 Factin C4 Gata3 C5 Pard6.lif - ctrl/111:0203-0212-0622:c:3/5 z:41/66 - ctrl/111	6.32	20.74
190406 Ctrl DMSO Inhibitor C1 DAPI C2 BF C3 Factin C4 Gata3 C5 Pard6.lif - ctrl/111:0203-0310-0203:c:3/5 z:41/66 - ctrl/111	29.47	50.88	3.72096	1.68644
190406 Ctrl DMSO Inhibitor C1 DAPI C2 BF C3 Factin C4 Gata3 C5 Pard6.lif - ctrl/111:0203-0310-0235:c:3/5 z:41/66 - ctrl/111	6.57	34.88
190406 Ctrl DMSO Inhibitor C1 DAPI C2 BF C3 Factin C4 Gata3 C5 Pard6.lif - ctrl/111:0203-0227-0292:c:3/5 z:41/66 - ctrl/111	7.92	30.17
190406 Ctrl DMSO Inhibitor C1 DAPI C2 BF C3 Factin C4 Gata3 C5 Pard6.lif - ctrl/111:0203-0511-0274:c:3/5 z:41/66 - ctrl/111	21.05	51.55	5.18473	1.26627
190406 Ctrl DMSO Inhibitor C1 DAPI C2 BF C3 Factin C4 Gata3 C5 Pard6.lif - ctrl/111:0203-0546-0292:c:3/5 z:41/66 - ctrl/111	2.18	38.41
190406 Ctrl DMSO Inhibitor C1 DAPI C2 BF C3 Factin C4 Gata3 C5 Pard6.lif - ctrl/111:0203-0506-0295:c:3/5 z:41/66 - ctrl/111	4.06	40.71
190406 Ctrl DMSO Inhibitor C1 DAPI C2 BF C3 Factin C4 Gata3 C5 Pard6.lif - ctrl/111:0203-0602-0520:c:3/5 z:41/66 - ctrl/111	13.21	68.62	1.51491	2.38181
190406 Ctrl DMSO Inhibitor C1 DAPI C2 BF C3 Factin C4 Gata3 C5 Pard6.lif - ctrl/111:0203-0590-0607:c:3/5 z:41/66 - ctrl/111	4.56	58.58
190406 Ctrl DMSO Inhibitor C1 DAPI C2 BF C3 Factin C4 Gata3 C5 Pard6.lif - ctrl/111:0203-0543-0536:c:3/5 z:41/66 - ctrl/111	8.72	28.81
Embryo 110
190406 Ctrl DMSO Inhibitor C1 DAPI C2 BF C3 Factin C4 Gata3 C5 Pard6.lif - ctrl/110:0218-0655-0697:c:3/5 z:44/66 - ctrl/110	47.69	66.43	1.72166	1.32015	2.32281	1.52794
190406 Ctrl DMSO Inhibitor C1 DAPI C2 BF C3 Factin C4 Gata3 C5 Pard6.lif - ctrl/110:0218-0610-0649:c:3/5 z:44/66 - ctrl/110	17.96	47.92
190406 Ctrl DMSO Inhibitor C1 DAPI C2 BF C3 Factin C4 Gata3 C5 Pard6.lif - ctrl/110:0218-0586-0625:c:3/5 z:44/66 - ctrl/110	27.7	50.32
190406 Ctrl DMSO Inhibitor C1 DAPI C2 BF C3 Factin C4 Gata3 C5 Pard6.lif - ctrl/110:0228-0459-0687:c:3/5 z:46/66 - ctrl/110	39.66	61.49	1.70875	1.42338
190406 Ctrl DMSO Inhibitor C1 DAPI C2 BF C3 Factin C4 Gata3 C5 Pard6.lif - ctrl/110:0228-0498-0685:c:3/5 z:46/66 - ctrl/110	15.09	38.16
190406 Ctrl DMSO Inhibitor C1 DAPI C2 BF C3 Factin C4 Gata3 C5 Pard6.lif - ctrl/110:0228-0493-0619:c:3/5 z:46/66 - ctrl/110	23.21	43.2
190406 Ctrl DMSO Inhibitor C1 DAPI C2 BF C3 Factin C4 Gata3 C5 Pard6.lif - ctrl/110:0228-0395-0561:c:3/5 z:46/66 - ctrl/110	73.62	54.29	6.02948	1.48171
190406 Ctrl DMSO Inhibitor C1 DAPI C2 BF C3 Factin C4 Gata3 C5 Pard6.lif - ctrl/110:0228-0454-0539:c:3/5 z:46/66 - ctrl/110	12.92	34.93
190406 Ctrl DMSO Inhibitor C1 DAPI C2 BF C3 Factin C4 Gata3 C5 Pard6.lif - ctrl/110:0228-0481-0469:c:3/5 z:46/66 - ctrl/110	12.21	36.64
190406 Ctrl DMSO Inhibitor C1 DAPI C2 BF C3 Factin C4 Gata3 C5 Pard6.lif - ctrl/110:0228-0447-0393:c:3/5 z:46/66 - ctrl/110	32.88	60.45	2.42478	1.60985
190406 Ctrl DMSO Inhibitor C1 DAPI C2 BF C3 Factin C4 Gata3 C5 Pard6.lif - ctrl/110:0228-0471-0400:c:3/5 z:46/66 - ctrl/110	9.69	38.65
190406 Ctrl DMSO Inhibitor C1 DAPI C2 BF C3 Factin C4 Gata3 C5 Pard6.lif - ctrl/110:0228-0486-0472:c:3/5 z:46/66 - ctrl/110	13.56	37.55
190406 Ctrl DMSO Inhibitor C1 DAPI C2 BF C3 Factin C4 Gata3 C5 Pard6.lif - ctrl/110:0228-0742-0194:c:3/5 z:46/66 - ctrl/110	21.85	82.56	1.38204	1.80459
190406 Ctrl DMSO Inhibitor C1 DAPI C2 BF C3 Factin C4 Gata3 C5 Pard6.lif - ctrl/110:0228-0721-0241:c:3/5 z:46/66 - ctrl/110	7.68	34.85
190406 Ctrl DMSO Inhibitor C1 DAPI C2 BF C3 Factin C4 Gata3 C5 Pard6.lif - ctrl/110:0228-0661-0260:c:3/5 z:46/66 - ctrl/110	15.81	45.75
190406 Ctrl DMSO Inhibitor C1 DAPI C2 BF C3 Factin C4 Gata3 C5 Pard6.lif - ctrl/110:0208-0843-0390:c:3/5 z:42/66 - ctrl/110	14.81		0.670136
190406 Ctrl DMSO Inhibitor C1 DAPI C2 BF C3 Factin C4 Gata3 C5 Pard6.lif - ctrl/110:0208-0839-0383:c:3/5 z:42/66 - ctrl/110	10.02
190406 Ctrl DMSO Inhibitor C1 DAPI C2 BF C3 Factin C4 Gata3 C5 Pard6.lif - ctrl/110:0208-0816-0426:c:3/5 z:42/66 - ctrl/110	22.1
Embryo 109
190406 Ctrl DMSO Inhibitor C1 DAPI C2 BF C3 Factin C4 Gata3 C5 Pard6.lif - ctrl/109:0203-0409-0557:c:3/5 z:41/66 - ctrl/109	36.07	24.28	1.63287	1.01293	1.3597	1.39375
190406 Ctrl DMSO Inhibitor C1 DAPI C2 BF C3 Factin C4 Gata3 C5 Pard6.lif - ctrl/109:0203-0398-0510:c:3/5 z:41/66 - ctrl/109	15.58	20.89
190406 Ctrl DMSO Inhibitor C1 DAPI C2 BF C3 Factin C4 Gata3 C5 Pard6.lif - ctrl/109:0203-0455-0444:c:3/5 z:41/66 - ctrl/109	22.09	23.97
190406 Ctrl DMSO Inhibitor C1 DAPI C2 BF C3 Factin C4 Gata3 C5 Pard6.lif - ctrl/109:0203-0586-0673:c:3/5 z:41/66 - ctrl/109	18.69	36.2	1.92482	1.10164
190406 Ctrl DMSO Inhibitor C1 DAPI C2 BF C3 Factin C4 Gata3 C5 Pard6.lif - ctrl/109:0203-0581-0621:c:3/5 z:41/66 - ctrl/109	12.91	39.69
190406 Ctrl DMSO Inhibitor C1 DAPI C2 BF C3 Factin C4 Gata3 C5 Pard6.lif - ctrl/109:0203-0643-0538:c:3/5 z:41/66 - ctrl/109	9.71	32.86
190406 Ctrl DMSO Inhibitor C1 DAPI C2 BF C3 Factin C4 Gata3 C5 Pard6.lif - ctrl/109:0203-0799-0419:c:3/5 z:41/66 - ctrl/109	27.18	44.82	0.759006	1.23437
190406 Ctrl DMSO Inhibitor C1 DAPI C2 BF C3 Factin C4 Gata3 C5 Pard6.lif - ctrl/109:0203-0729-0404:c:3/5 z:41/66 - ctrl/109	20.42	37.73
190406 Ctrl DMSO Inhibitor C1 DAPI C2 BF C3 Factin C4 Gata3 C5 Pard6.lif - ctrl/109:0203-0648-0283:c:3/5 z:41/66 - ctrl/109	35.81	36.31
190406 Ctrl DMSO Inhibitor C1 DAPI C2 BF C3 Factin C4 Gata3 C5 Pard6.lif - ctrl/109:0238-0639-0205:c:3/5 z:48/66 - ctrl/109	21.41	46.97	1.12212	2.22607
190406 Ctrl DMSO Inhibitor C1 DAPI C2 BF C3 Factin C4 Gata3 C5 Pard6.lif - ctrl/109:0238-0625-0215:c:3/5 z:48/66 - ctrl/109	17.2	37.13
190406 Ctrl DMSO Inhibitor C1 DAPI C2 BF C3 Factin C4 Gata3 C5 Pard6.lif - ctrl/109:0238-0636-0289:c:3/5 z:48/66 - ctrl/109	19.08	21.1
Embryo 108
190406 Ctrl DMSO Inhibitor C1 DAPI C2 BF C3 Factin C4 Gata3 C5 Pard6.lif - ctrl/108:0213-0333-0485:c:3/5 z:43/66 - ctrl/108	77.18	28.45	3.07735	0.743402	2.71893	0.976289
190406 Ctrl DMSO Inhibitor C1 DAPI C2 BF C3 Factin C4 Gata3 C5 Pard6.lif - ctrl/108:0213-0355-0504:c:3/5 z:43/66 - ctrl/108	22.61	51.63
190406 Ctrl DMSO Inhibitor C1 DAPI C2 BF C3 Factin C4 Gata3 C5 Pard6.lif - ctrl/108:0213-0378-0594:c:3/5 z:43/66 - ctrl/108	25.08	38.27
190406 Ctrl DMSO Inhibitor C1 DAPI C2 BF C3 Factin C4 Gata3 C5 Pard6.lif - ctrl/108:0213-0404-0359:c:3/5 z:43/66 - ctrl/108	50.33	10.23	1.95989	0.254541
190406 Ctrl DMSO Inhibitor C1 DAPI C2 BF C3 Factin C4 Gata3 C5 Pard6.lif - ctrl/108:0213-0456-0358:c:3/5 z:43/66 - ctrl/108	23.88	46.47
190406 Ctrl DMSO Inhibitor C1 DAPI C2 BF C3 Factin C4 Gata3 C5 Pard6.lif - ctrl/108:0213-0421-0446:c:3/5 z:43/66 - ctrl/108	25.68	40.19
190406 Ctrl DMSO Inhibitor C1 DAPI C2 BF C3 Factin C4 Gata3 C5 Pard6.lif - ctrl/108:0213-0634-0325:c:3/5 z:43/66 - ctrl/108	46.33	38.25	2.30612	1.44449
190406 Ctrl DMSO Inhibitor C1 DAPI C2 BF C3 Factin C4 Gata3 C5 Pard6.lif - ctrl/108:0213-0653-0349:c:3/5 z:43/66 - ctrl/108	21.82	26.29
190406 Ctrl DMSO Inhibitor C1 DAPI C2 BF C3 Factin C4 Gata3 C5 Pard6.lif - ctrl/108:0213-0621-0426:c:3/5 z:43/66 - ctrl/108	20.09	26.48
190406 Ctrl DMSO Inhibitor C1 DAPI C2 BF C3 Factin C4 Gata3 C5 Pard6.lif - ctrl/108:0213-0568-0776:c:3/5 z:43/66 - ctrl/108	79.4	27.86	2.51664	0.738404
190406 Ctrl DMSO Inhibitor C1 DAPI C2 BF C3 Factin C4 Gata3 C5 Pard6.lif - ctrl/108:0213-0600-0739:c:3/5 z:43/66 - ctrl/108	20.43	23.9
190406 Ctrl DMSO Inhibitor C1 DAPI C2 BF C3 Factin C4 Gata3 C5 Pard6.lif - ctrl/108:0213-0573-0675:c:3/5 z:43/66 - ctrl/108	31.55	37.73
190406 Ctrl DMSO Inhibitor C1 DAPI C2 BF C3 Factin C4 Gata3 C5 Pard6.lif - ctrl/108:0213-0736-0716:c:3/5 z:43/66 - ctrl/108	92.75	25.58	4.90222	1.1146
190406 Ctrl DMSO Inhibitor C1 DAPI C2 BF C3 Factin C4 Gata3 C5 Pard6.lif - ctrl/108:0213-0730-0676:c:3/5 z:43/66 - ctrl/108	27.26	24.9
190406 Ctrl DMSO Inhibitor C1 DAPI C2 BF C3 Factin C4 Gata3 C5 Pard6.lif - ctrl/108:0213-0644-0698:c:3/5 z:43/66 - ctrl/108	18.92	22.95
190406 Ctrl DMSO Inhibitor C1 DAPI C2 BF C3 Factin C4 Gata3 C5 Pard6.lif - ctrl/108:0193-0878-0481:c:3/5 z:39/66 - ctrl/108	42.15	39.62	1.55134	1.5623
190406 Ctrl DMSO Inhibitor C1 DAPI C2 BF C3 Factin C4 Gata3 C5 Pard6.lif - ctrl/108:0193-0844-0476:c:3/5 z:39/66 - ctrl/108	31.55	35.78
190406 Ctrl DMSO Inhibitor C1 DAPI C2 BF C3 Factin C4 Gata3 C5 Pard6.lif - ctrl/108:0193-0763-0476:c:3/5 z:39/66 - ctrl/108	27.17	25.36
Embryo 107
190406 Ctrl DMSO Inhibitor C1 DAPI C2 BF C3 Factin C4 Gata3 C5 Pard6.lif - ctrl/107:0153-0452-0243:c:3/5 z:31/66 - ctrl/107	36.76	66.62	1.50779	1.60106	2.17703	1.51807
190406 Ctrl DMSO Inhibitor C1 DAPI C2 BF C3 Factin C4 Gata3 C5 Pard6.lif - ctrl/107:0153-0472-0243:c:3/5 z:31/66 - ctrl/107	25.9	33.44
190406 Ctrl DMSO Inhibitor C1 DAPI C2 BF C3 Factin C4 Gata3 C5 Pard6.lif - ctrl/107:0153-0480-0290:c:3/5 z:31/66 - ctrl/107	24.38	41.61
190406 Ctrl DMSO Inhibitor C1 DAPI C2 BF C3 Factin C4 Gata3 C5 Pard6.lif - ctrl/107:0118-0310-0488:c:3/5 z:24/66 - ctrl/107	74.55	38.94	1.21318	1.11162
190406 Ctrl DMSO Inhibitor C1 DAPI C2 BF C3 Factin C4 Gata3 C5 Pard6.lif - ctrl/107:0118-0342-0471:c:3/5 z:24/66 - ctrl/107	52.67	35.01
190406 Ctrl DMSO Inhibitor C1 DAPI C2 BF C3 Factin C4 Gata3 C5 Pard6.lif - ctrl/107:0118-0371-0476:c:3/5 z:24/66 - ctrl/107	61.45	35.03
190406 Ctrl DMSO Inhibitor C1 DAPI C2 BF C3 Factin C4 Gata3 C5 Pard6.lif - ctrl/107:0118-0496-0674:c:3/5 z:24/66 - ctrl/107	70.94	36.95	4.1754	0.9021
190406 Ctrl DMSO Inhibitor C1 DAPI C2 BF C3 Factin C4 Gata3 C5 Pard6.lif - ctrl/107:0118-0542-0676:c:3/5 z:24/66 - ctrl/107	10.48	30.92
190406 Ctrl DMSO Inhibitor C1 DAPI C2 BF C3 Factin C4 Gata3 C5 Pard6.lif - ctrl/107:0118-0498-0566:c:3/5 z:24/66 - ctrl/107	16.99	40.96
190406 Ctrl DMSO Inhibitor C1 DAPI C2 BF C3 Factin C4 Gata3 C5 Pard6.lif - ctrl/107:0153-0686-0731:c:3/5 z:31/66 - ctrl/107	32.44	52.88	3.08072	1.90627
190406 Ctrl DMSO Inhibitor C1 DAPI C2 BF C3 Factin C4 Gata3 C5 Pard6.lif - ctrl/107:0153-0726-0716:c:3/5 z:31/66 - ctrl/107	19.14	28.23
190406 Ctrl DMSO Inhibitor C1 DAPI C2 BF C3 Factin C4 Gata3 C5 Pard6.lif - ctrl/107:0153-0731-0632:c:3/5 z:31/66 - ctrl/107	10.53	27.74
190406 Ctrl DMSO Inhibitor C1 DAPI C2 BF C3 Factin C4 Gata3 C5 Pard6.lif - ctrl/107:0153-0765-0245:c:3/5 z:31/66 - ctrl/107	46.5	67.74	1.02491	1.56987
190406 Ctrl DMSO Inhibitor C1 DAPI C2 BF C3 Factin C4 Gata3 C5 Pard6.lif - ctrl/107:0153-0754-0242:c:3/5 z:31/66 - ctrl/107	27.33	46.32
190406 Ctrl DMSO Inhibitor C1 DAPI C2 BF C3 Factin C4 Gata3 C5 Pard6.lif - ctrl/107:0153-0686-0247:c:3/5 z:31/66 - ctrl/107	45.37	43.15
190406 Ctrl DMSO Inhibitor C1 DAPI C2 BF C3 Factin C4 Gata3 C5 Pard6.lif - ctrl/107:0183-0766-0244:c:3/5 z:37/66 - ctrl/107	47.59	62.94	2.06017	1.78401
190406 Ctrl DMSO Inhibitor C1 DAPI C2 BF C3 Factin C4 Gata3 C5 Pard6.lif - ctrl/107:0183-0740-0246:c:3/5 z:37/66 - ctrl/107	11.94	32.87
190406 Ctrl DMSO Inhibitor C1 DAPI C2 BF C3 Factin C4 Gata3 C5 Pard6.lif - ctrl/107:0183-0674-0250:c:3/5 z:37/66 - ctrl/107	23.1	35.28
apical		59.5		1.75155
cytoplasm		30.82
basal		33.97
Embryo 134
190613 Media only DMSO inhibitor 5uM C1Factin C2Gata3 C3Pard6b C4 DAPI C5BF.lif - media only/134:0191-0251-0368:c:1/5 z:39/78 - media only/134	64.05	62.23	1.17782	1.35607	1.58978	1.54373
190613 Media only DMSO inhibitor 5uM C1Factin C2Gata3 C3Pard6b C4 DAPI C5BF.lif - media only/134:0191-0265-0351:c:1/5 z:39/78 - media only/134	57.06	48.26
190613 Media only DMSO inhibitor 5uM C1Factin C2Gata3 C3Pard6b C4 DAPI C5BF.lif - media only/134:0191-0323-0333:c:1/5 z:39/78 - media only/134	54.38	45.89
190613 Media only DMSO inhibitor 5uM C1Factin C2Gata3 C3Pard6b C4 DAPI C5BF.lif - media only/134:0191-0211-0607:c:1/5 z:39/78 - media only/134	63.52	62.75	1.3311	1.55978
190613 Media only DMSO inhibitor 5uM C1Factin C2Gata3 C3Pard6b C4 DAPI C5BF.lif - media only/134:0191-0257-0670:c:1/5 z:39/78 - media only/134	58.61	37.57
190613 Media only DMSO inhibitor 5uM C1Factin C2Gata3 C3Pard6b C4 DAPI C5BF.lif - media only/134:0191-0299-0651:c:1/5 z:39/78 - media only/134	47.72	40.23
190613 Media only DMSO inhibitor 5uM C1Factin C2Gata3 C3Pard6b C4 DAPI C5BF.lif - media only/134:0191-0406-0773:c:1/5 z:39/78 - media only/134	84.27	49.45	1.37203	1.1718
190613 Media only DMSO inhibitor 5uM C1Factin C2Gata3 C3Pard6b C4 DAPI C5BF.lif - media only/134:0191-0455-0796:c:1/5 z:39/78 - media only/134	37.81	40.18
190613 Media only DMSO inhibitor 5uM C1Factin C2Gata3 C3Pard6b C4 DAPI C5BF.lif - media only/134:0191-0495-0728:c:1/5 z:39/78 - media only/134	61.42	42.2
190613 Media only DMSO inhibitor 5uM C1Factin C2Gata3 C3Pard6b C4 DAPI C5BF.lif - media only/134:0191-0842-0401:c:1/5 z:39/78 - media only/134	53.28	49.87	1.1772	1.28963
190613 Media only DMSO inhibitor 5uM C1Factin C2Gata3 C3Pard6b C4 DAPI C5BF.lif - media only/134:0191-0815-0414:c:1/5 z:39/78 - media only/134	60.61	34.91
190613 Media only DMSO inhibitor 5uM C1Factin C2Gata3 C3Pard6b C4 DAPI C5BF.lif - media only/134:0191-0729-0366:c:1/5 z:39/78 - media only/134	45.26	38.67
190613 Media only DMSO inhibitor 5uM C1Factin C2Gata3 C3Pard6b C4 DAPI C5BF.lif - media only/134:0191-0804-0626:c:1/5 z:39/78 - media only/134	66.95	63.92	2.89076	2.34139
190613 Media only DMSO inhibitor 5uM C1Factin C2Gata3 C3Pard6b C4 DAPI C5BF.lif - media only/134:0191-0792-0623:c:1/5 z:39/78 - media only/134	71.84	39.68
190613 Media only DMSO inhibitor 5uM C1Factin C2Gata3 C3Pard6b C4 DAPI C5BF.lif - media only/134:0191-0772-0534:c:1/5 z:39/78 - media only/134	23.16	27.3
Embryo 133
190613 Media only DMSO inhibitor 5uM C1Factin C2Gata3 C3Pard6b C4 DAPI C5BF.lif - media only/133:0196-0675-0370:c:1/5 z:40/78 - media only/133	127.97	66.42	3.28634	1.44769	1.91775	1.35181
190613 Media only DMSO inhibitor 5uM C1Factin C2Gata3 C3Pard6b C4 DAPI C5BF.lif - media only/133:0196-0587-0381:c:1/5 z:40/78 - media only/133	62.25	34.39
190613 Media only DMSO inhibitor 5uM C1Factin C2Gata3 C3Pard6b C4 DAPI C5BF.lif - media only/133:0196-0504-0392:c:1/5 z:40/78 - media only/133	38.94	45.88
190613 Media only DMSO inhibitor 5uM C1Factin C2Gata3 C3Pard6b C4 DAPI C5BF.lif - media only/133:0196-0795-0505:c:1/5 z:40/78 - media only/133	115.53	52.96	3.23795	1.32632
190613 Media only DMSO inhibitor 5uM C1Factin C2Gata3 C3Pard6b C4 DAPI C5BF.lif - media only/133:0196-0736-0533:c:1/5 z:40/78 - media only/133	39.12	48.05
190613 Media only DMSO inhibitor 5uM C1Factin C2Gata3 C3Pard6b C4 DAPI C5BF.lif - media only/133:0196-0724-0582:c:1/5 z:40/78 - media only/133	35.68	39.93
190613 Media only DMSO inhibitor 5uM C1Factin C2Gata3 C3Pard6b C4 DAPI C5BF.lif - media only/133:0191-0784-0595:c:1/5 z:36/78 - media only/133	56.61	39.36	0.99683	1.2551
190613 Media only DMSO inhibitor 5uM C1Factin C2Gata3 C3Pard6b C4 DAPI C5BF.lif - media only/133:0191-0731-0637:c:1/5 z:36/78 - media only/133	38.17	54.13
190613 Media only DMSO inhibitor 5uM C1Factin C2Gata3 C3Pard6b C4 DAPI C5BF.lif - media only/133:0191-0697-0710:c:1/5 z:36/78 - media only/133	56.79	31.36
190613 Media only DMSO inhibitor 5uM C1Factin C2Gata3 C3Pard6b C4 DAPI C5BF.lif - media only/133:0191-0806-0770:c:1/5 z:36/78 - media only/133	32.76	53.76	0.441926	1.37811
190613 Media only DMSO inhibitor 5uM C1Factin C2Gata3 C3Pard6b C4 DAPI C5BF.lif - media only/133:0191-0778-0805:c:1/5 z:36/78 - media only/133	16.59	46.5
190613 Media only DMSO inhibitor 5uM C1Factin C2Gata3 C3Pard6b C4 DAPI C5BF.lif - media only/133:0191-0641-0748:c:1/5 z:36/78 - media only/133	74.13	39.01
190613 Media only DMSO inhibitor 5uM C1Factin C2Gata3 C3Pard6b C4 DAPI C5BF.lif - media only/133:0151-0212-0580:c:1/5 z:31/78 - media only/133	77.66		1.62571
190613 Media only DMSO inhibitor 5uM C1Factin C2Gata3 C3Pard6b C4 DAPI C5BF.lif - media only/133:0151-0219-0668:c:1/5 z:31/78 - media only/133	123.93
190613 Media only DMSO inhibitor 5uM C1Factin C2Gata3 C3Pard6b C4 DAPI C5BF.lif - media only/133:0151-0399-0594:c:1/5 z:31/78 - media only/133	47.77
Embryo 210
220120 C1-PARD6B C2-GATA3 C3-DAPI BF C4-FACTIN 7.5uM U73122 treatment DMSO media ctrl.lif - ctrl media/210:0195-0378-0510:c:5/5 z:39/76 - ctrl media/210	75.03	114.12	3.54584	1.94412	1.72887	1.91325
220120 C1-PARD6B C2-GATA3 C3-DAPI BF C4-FACTIN 7.5uM U73122 treatment DMSO media ctrl.lif - ctrl media/210:0195-0394-0511:c:5/5 z:39/76 - ctrl media/210	31.89	50.35
220120 C1-PARD6B C2-GATA3 C3-DAPI BF C4-FACTIN 7.5uM U73122 treatment DMSO media ctrl.lif - ctrl media/210:0195-0509-0464:c:5/5 z:39/76 - ctrl media/210	21.16	58.7
220120 C1-PARD6B C2-GATA3 C3-DAPI BF C4-FACTIN 7.5uM U73122 treatment DMSO media ctrl.lif - ctrl media/210:0195-0691-0365:c:5/5 z:39/76 - ctrl media/210	65.63	100.92	1.07361	1.79318
220120 C1-PARD6B C2-GATA3 C3-DAPI BF C4-FACTIN 7.5uM U73122 treatment DMSO media ctrl.lif - ctrl media/210:0195-0677-0382:c:5/5 z:39/76 - ctrl media/210	29.06	42.73
220120 C1-PARD6B C2-GATA3 C3-DAPI BF C4-FACTIN 7.5uM U73122 treatment DMSO media ctrl.lif - ctrl media/210:0195-0641-0332:c:5/5 z:39/76 - ctrl media/210	61.13	56.28
220120 C1-PARD6B C2-GATA3 C3-DAPI BF C4-FACTIN 7.5uM U73122 treatment DMSO media ctrl.lif - ctrl media/210:0195-0746-0491:c:5/5 z:39/76 - ctrl media/210	51.14	91.59	1.59513	1.53033
220120 C1-PARD6B C2-GATA3 C3-DAPI BF C4-FACTIN 7.5uM U73122 treatment DMSO media ctrl.lif - ctrl media/210:0195-0713-0527:c:5/5 z:39/76 - ctrl media/210	21.46	48.15
220120 C1-PARD6B C2-GATA3 C3-DAPI BF C4-FACTIN 7.5uM U73122 treatment DMSO media ctrl.lif - ctrl media/210:0195-0675-0507:c:5/5 z:39/76 - ctrl media/210	32.06	59.85
220120 C1-PARD6B C2-GATA3 C3-DAPI BF C4-FACTIN 7.5uM U73122 treatment DMSO media ctrl.lif - ctrl media/210:0195-0710-0664:c:5/5 z:39/76 - ctrl media/210	47.15	79.95	1.13916	2.49454
220120 C1-PARD6B C2-GATA3 C3-DAPI BF C4-FACTIN 7.5uM U73122 treatment DMSO media ctrl.lif - ctrl media/210:0195-0679-0644:c:5/5 z:39/76 - ctrl media/210	46.57	33.44
220120 C1-PARD6B C2-GATA3 C3-DAPI BF C4-FACTIN 7.5uM U73122 treatment DMSO media ctrl.lif - ctrl media/210:0195-0665-0591:c:5/5 z:39/76 - ctrl media/210	41.39	32.05
220120 C1-PARD6B C2-GATA3 C3-DAPI BF C4-FACTIN 7.5uM U73122 treatment DMSO media ctrl.lif - ctrl media/210:0135-0598-0636:c:5/5 z:27/76 - ctrl media/210	83.49	62.42	1.29062	2.16136
220120 C1-PARD6B C2-GATA3 C3-DAPI BF C4-FACTIN 7.5uM U73122 treatment DMSO media ctrl.lif - ctrl media/210:0135-0601-0618:c:5/5 z:27/76 - ctrl media/210	33.71	21.54
220120 C1-PARD6B C2-GATA3 C3-DAPI BF C4-FACTIN 7.5uM U73122 treatment DMSO media ctrl.lif - ctrl media/210:0135-0605-0542:c:5/5 z:27/76 - ctrl media/210	64.69	28.88
apical		50.95		1.71954
cytoplasm		21.67
basal		29.63
apical		54.73		1.74968
cytoplasm		30.68
basal		31.28
Embryo 209
220120 C1-PARD6B C2-GATA3 C3-DAPI BF C4-FACTIN 7.5uM U73122 treatment DMSO media ctrl.lif - ctrl media/209:0205-0653-0707:c:5/5 z:41/81 - ctrl media/209	59.61	47.71	1.65216	1.14166	2.14857	1.10284
220120 C1-PARD6B C2-GATA3 C3-DAPI BF C4-FACTIN 7.5uM U73122 treatment DMSO media ctrl.lif - ctrl media/209:0205-0655-0717:c:5/5 z:41/81 - ctrl media/209	30.68	37.22
220120 C1-PARD6B C2-GATA3 C3-DAPI BF C4-FACTIN 7.5uM U73122 treatment DMSO media ctrl.lif - ctrl media/209:0205-0641-0677:c:5/5 z:41/81 - ctrl media/209	36.08	41.79
220120 C1-PARD6B C2-GATA3 C3-DAPI BF C4-FACTIN 7.5uM U73122 treatment DMSO media ctrl.lif - ctrl media/209:0205-0497-0688:c:5/5 z:41/81 - ctrl media/209	97.23	30.09	2.80849	0.713033
220120 C1-PARD6B C2-GATA3 C3-DAPI BF C4-FACTIN 7.5uM U73122 treatment DMSO media ctrl.lif - ctrl media/209:0205-0516-0676:c:5/5 z:41/81 - ctrl media/209	53.69	52.68
220120 C1-PARD6B C2-GATA3 C3-DAPI BF C4-FACTIN 7.5uM U73122 treatment DMSO media ctrl.lif - ctrl media/209:0205-0538-0598:c:5/5 z:41/81 - ctrl media/209	34.62	42.2
220120 C1-PARD6B C2-GATA3 C3-DAPI BF C4-FACTIN 7.5uM U73122 treatment DMSO media ctrl.lif - ctrl media/209:0160-0796-0565:c:5/5 z:32/81 - ctrl media/209	65.64	48.06	2.21757	1.01307
220120 C1-PARD6B C2-GATA3 C3-DAPI BF C4-FACTIN 7.5uM U73122 treatment DMSO media ctrl.lif - ctrl media/209:0160-0781-0591:c:5/5 z:32/81 - ctrl media/209	44.5	35.96
220120 C1-PARD6B C2-GATA3 C3-DAPI BF C4-FACTIN 7.5uM U73122 treatment DMSO media ctrl.lif - ctrl media/209:0160-0738-0492:c:5/5 z:32/81 - ctrl media/209	29.6	47.44
220120 C1-PARD6B C2-GATA3 C3-DAPI BF C4-FACTIN 7.5uM U73122 treatment DMSO media ctrl.lif - ctrl media/209:0160-0768-0435:c:5/5 z:32/81 - ctrl media/209	147.88	58.19	4.15393	1.20302
220120 C1-PARD6B C2-GATA3 C3-DAPI BF C4-FACTIN 7.5uM U73122 treatment DMSO media ctrl.lif - ctrl media/209:0160-0719-0440:c:5/5 z:32/81 - ctrl media/209	23.72	44.92
220120 C1-PARD6B C2-GATA3 C3-DAPI BF C4-FACTIN 7.5uM U73122 treatment DMSO media ctrl.lif - ctrl media/209:0160-0706-0460:c:5/5 z:32/81 - ctrl media/209	35.6	48.37
220120 C1-PARD6B C2-GATA3 C3-DAPI BF C4-FACTIN 7.5uM U73122 treatment DMSO media ctrl.lif - ctrl media/209:0175-0490-0468:c:5/5 z:37/81 - ctrl media/209	42.97	56.9	1.30847	1.22656
220120 C1-PARD6B C2-GATA3 C3-DAPI BF C4-FACTIN 7.5uM U73122 treatment DMSO media ctrl.lif - ctrl media/209:0175-0494-0472:c:5/5 z:37/81 - ctrl media/209	31.69	44.17
220120 C1-PARD6B C2-GATA3 C3-DAPI BF C4-FACTIN 7.5uM U73122 treatment DMSO media ctrl.lif - ctrl media/209:0175-0522-0492:c:5/5 z:37/81 - ctrl media/209	32.84	46.39
220120 C1-PARD6B C2-GATA3 C3-DAPI BF C4-FACTIN 7.5uM U73122 treatment DMSO media ctrl.lif - ctrl media/209:0105-0521-0441:c:5/5 z:19/81 - ctrl media/209	81.35	61.84	1.72352	1.31968
220120 C1-PARD6B C2-GATA3 C3-DAPI BF C4-FACTIN 7.5uM U73122 treatment DMSO media ctrl.lif - ctrl media/209:0105-0531-0455:c:5/5 z:19/81 - ctrl media/209	61.73	38.98
220120 C1-PARD6B C2-GATA3 C3-DAPI BF C4-FACTIN 7.5uM U73122 treatment DMSO media ctrl.lif - ctrl media/209:0105-0524-0526:c:5/5 z:19/81 - ctrl media/209	47.2	46.86
220120 C1-PARD6B C2-GATA3 C3-DAPI BF C4-FACTIN 7.5uM U73122 treatment DMSO media ctrl.lif - ctrl media/209:0105-0446-0548:c:5/5 z:19/81 - ctrl media/209	53.42		0.785935
220120 C1-PARD6B C2-GATA3 C3-DAPI BF C4-FACTIN 7.5uM U73122 treatment DMSO media ctrl.lif - ctrl media/209:0105-0515-0583:c:5/5 z:19/81 - ctrl media/209	59.67
220120 C1-PARD6B C2-GATA3 C3-DAPI BF C4-FACTIN 7.5uM U73122 treatment DMSO media ctrl.lif - ctrl media/209:0105-0501-0631:c:5/5 z:19/81 - ctrl media/209	67.97
220120 C1-PARD6B C2-GATA3 C3-DAPI BF C4-FACTIN 7.5uM U73122 treatment DMSO media ctrl.lif - ctrl media/209:0105-0431-0662:c:5/5 z:19/81 - ctrl media/209	35.16		0.742085
220120 C1-PARD6B C2-GATA3 C3-DAPI BF C4-FACTIN 7.5uM U73122 treatment DMSO media ctrl.lif - ctrl media/209:0105-0498-0692:c:5/5 z:19/81 - ctrl media/209	70.12
220120 C1-PARD6B C2-GATA3 C3-DAPI BF C4-FACTIN 7.5uM U73122 treatment DMSO media ctrl.lif - ctrl media/209:0105-0542-0674:c:5/5 z:19/81 - ctrl media/209	47.38
220120 C1-PARD6B C2-GATA3 C3-DAPI BF C4-FACTIN 7.5uM U73122 treatment DMSO media ctrl.lif - ctrl media/209:0105-0667-0716:c:5/5 z:19/81 - ctrl media/209	174.17		3.94496
220120 C1-PARD6B C2-GATA3 C3-DAPI BF C4-FACTIN 7.5uM U73122 treatment DMSO media ctrl.lif - ctrl media/209:0105-0651-0665:c:5/5 z:19/81 - ctrl media/209	64.4
220120 C1-PARD6B C2-GATA3 C3-DAPI BF C4-FACTIN 7.5uM U73122 treatment DMSO media ctrl.lif - ctrl media/209:0105-0674-0640:c:5/5 z:19/81 - ctrl media/209	44.15
Embryo 208
220120 C1-PARD6B C2-GATA3 C3-DAPI BF C4-FACTIN 7.5uM U73122 treatment DMSO media ctrl.lif - ctrl media/208:0205-0590-0679:c:5/5 z:41/81 - ctrl media/208	121.79	41.25	3.45896	1.07143	2.95424	0.887244
220120 C1-PARD6B C2-GATA3 C3-DAPI BF C4-FACTIN 7.5uM U73122 treatment DMSO media ctrl.lif - ctrl media/208:0205-0564-0662:c:5/5 z:41/81 - ctrl media/208	41.36	42.23
220120 C1-PARD6B C2-GATA3 C3-DAPI BF C4-FACTIN 7.5uM U73122 treatment DMSO media ctrl.lif - ctrl media/208:0205-0559-0607:c:5/5 z:41/81 - ctrl media/208	35.21	38.5
220120 C1-PARD6B C2-GATA3 C3-DAPI BF C4-FACTIN 7.5uM U73122 treatment DMSO media ctrl.lif - ctrl media/208:0205-0457-0802:c:5/5 z:41/81 - ctrl media/208	87.42	55.93	2.60955	0.987116
220120 C1-PARD6B C2-GATA3 C3-DAPI BF C4-FACTIN 7.5uM U73122 treatment DMSO media ctrl.lif - ctrl media/208:0205-0463-0765:c:5/5 z:41/81 - ctrl media/208	42.3	41.94
220120 C1-PARD6B C2-GATA3 C3-DAPI BF C4-FACTIN 7.5uM U73122 treatment DMSO media ctrl.lif - ctrl media/208:0205-0506-0723:c:5/5 z:41/81 - ctrl media/208	33.5	56.66
220120 C1-PARD6B C2-GATA3 C3-DAPI BF C4-FACTIN 7.5uM U73122 treatment DMSO media ctrl.lif - ctrl media/208:0185-0583-0525:c:5/5 z:37/81 - ctrl media/208	85.59	38.28	2.15375	0.936858
220120 C1-PARD6B C2-GATA3 C3-DAPI BF C4-FACTIN 7.5uM U73122 treatment DMSO media ctrl.lif - ctrl media/208:0185-0561-0565:c:5/5 z:37/81 - ctrl media/208	45.31	37.39
220120 C1-PARD6B C2-GATA3 C3-DAPI BF C4-FACTIN 7.5uM U73122 treatment DMSO media ctrl.lif - ctrl media/208:0185-0561-0600:c:5/5 z:37/81 - ctrl media/208	39.74	40.86
220120 C1-PARD6B C2-GATA3 C3-DAPI BF C4-FACTIN 7.5uM U73122 treatment DMSO media ctrl.lif - ctrl media/208:0185-0224-0662:c:5/5 z:37/81 - ctrl media/208	182.09	35.09	4.55453	0.769855
220120 C1-PARD6B C2-GATA3 C3-DAPI BF C4-FACTIN 7.5uM U73122 treatment DMSO media ctrl.lif - ctrl media/208:0185-0281-0648:c:5/5 z:37/81 - ctrl media/208	41.63	30.9
220120 C1-PARD6B C2-GATA3 C3-DAPI BF C4-FACTIN 7.5uM U73122 treatment DMSO media ctrl.lif - ctrl media/208:0185-0311-0659:c:5/5 z:37/81 - ctrl media/208	39.98	45.58
220120 C1-PARD6B C2-GATA3 C3-DAPI BF C4-FACTIN 7.5uM U73122 treatment DMSO media ctrl.lif - ctrl media/208:0185-0315-0770:c:5/5 z:37/81 - ctrl media/208	84.29	45.73	2.76633	1.17046
220120 C1-PARD6B C2-GATA3 C3-DAPI BF C4-FACTIN 7.5uM U73122 treatment DMSO media ctrl.lif - ctrl media/208:0185-0317-0758:c:5/5 z:37/81 - ctrl media/208	44.82	33.96
220120 C1-PARD6B C2-GATA3 C3-DAPI BF C4-FACTIN 7.5uM U73122 treatment DMSO media ctrl.lif - ctrl media/208:0185-0296-0704:c:5/5 z:37/81 - ctrl media/208	30.47	39.07
220120 C1-PARD6B C2-GATA3 C3-DAPI BF C4-FACTIN 7.5uM U73122 treatment DMSO media ctrl.lif - ctrl media/208:0185-0203-0534:c:5/5 z:37/81 - ctrl media/208	104.86	16.39	2.18231	0.387745
220120 C1-PARD6B C2-GATA3 C3-DAPI BF C4-FACTIN 7.5uM U73122 treatment DMSO media ctrl.lif - ctrl media/208:0185-0203-0524:c:5/5 z:37/81 - ctrl media/208	52.39	29.77
220120 C1-PARD6B C2-GATA3 C3-DAPI BF C4-FACTIN 7.5uM U73122 treatment DMSO media ctrl.lif - ctrl media/208:0185-0239-0545:c:5/5 z:37/81 - ctrl media/208	48.05	42.27
Embryo 207
220120 C1-PARD6B C2-GATA3 C3-DAPI BF C4-FACTIN 7.5uM U73122 treatment DMSO media ctrl.lif - ctrl media/207:0180-0446-0289:c:5/5 z:36/81 - ctrl media/207	162.64	74.18	5.60248	2.65688	2.91066	1.35148
220120 C1-PARD6B C2-GATA3 C3-DAPI BF C4-FACTIN 7.5uM U73122 treatment DMSO media ctrl.lif - ctrl media/207:0180-0499-0332:c:5/5 z:36/81 - ctrl media/207	29.33	28.06
220120 C1-PARD6B C2-GATA3 C3-DAPI BF C4-FACTIN 7.5uM U73122 treatment DMSO media ctrl.lif - ctrl media/207:0180-0540-0316:c:5/5 z:36/81 - ctrl media/207	29.03	27.92
220120 C1-PARD6B C2-GATA3 C3-DAPI BF C4-FACTIN 7.5uM U73122 treatment DMSO media ctrl.lif - ctrl media/207:0180-0574-0272:c:5/5 z:36/81 - ctrl media/207	71.48	33.52	2.73555	1.03107
220120 C1-PARD6B C2-GATA3 C3-DAPI BF C4-FACTIN 7.5uM U73122 treatment DMSO media ctrl.lif - ctrl media/207:0180-0595-0318:c:5/5 z:36/81 - ctrl media/207	15.6	28.78
220120 C1-PARD6B C2-GATA3 C3-DAPI BF C4-FACTIN 7.5uM U73122 treatment DMSO media ctrl.lif - ctrl media/207:0180-0539-0318:c:5/5 z:36/81 - ctrl media/207	26.13	32.51
220120 C1-PARD6B C2-GATA3 C3-DAPI BF C4-FACTIN 7.5uM U73122 treatment DMSO media ctrl.lif - ctrl media/207:0180-0351-0345:c:5/5 z:36/81 - ctrl media/207	67.93	21.9	1.28001	0.554571
220120 C1-PARD6B C2-GATA3 C3-DAPI BF C4-FACTIN 7.5uM U73122 treatment DMSO media ctrl.lif - ctrl media/207:0180-0379-0369:c:5/5 z:36/81 - ctrl media/207	29.02	32.37
220120 C1-PARD6B C2-GATA3 C3-DAPI BF C4-FACTIN 7.5uM U73122 treatment DMSO media ctrl.lif - ctrl media/207:0180-0419-0347:c:5/5 z:36/81 - ctrl media/207	53.07	39.49
220120 C1-PARD6B C2-GATA3 C3-DAPI BF C4-FACTIN 7.5uM U73122 treatment DMSO media ctrl.lif - ctrl media/207:0205-0358-0511:c:5/5 z:43/81 - ctrl media/207	86.43	86.49	2.00348	2.16821
220120 C1-PARD6B C2-GATA3 C3-DAPI BF C4-FACTIN 7.5uM U73122 treatment DMSO media ctrl.lif - ctrl media/207:0205-0384-0478:c:5/5 z:43/81 - ctrl media/207	33.36	37.86
220120 C1-PARD6B C2-GATA3 C3-DAPI BF C4-FACTIN 7.5uM U73122 treatment DMSO media ctrl.lif - ctrl media/207:0205-0449-0527:c:5/5 z:43/81 - ctrl media/207	43.14	39.89
220120 C1-PARD6B C2-GATA3 C3-DAPI BF C4-FACTIN 7.5uM U73122 treatment DMSO media ctrl.lif - ctrl media/207:0215-0465-0629:c:5/5 z:43/81 - ctrl media/207	67.11	56.9	2.0226	1.1274
220120 C1-PARD6B C2-GATA3 C3-DAPI BF C4-FACTIN 7.5uM U73122 treatment DMSO media ctrl.lif - ctrl media/207:0215-0479-0571:c:5/5 z:43/81 - ctrl media/207	34.68	45.13
220120 C1-PARD6B C2-GATA3 C3-DAPI BF C4-FACTIN 7.5uM U73122 treatment DMSO media ctrl.lif - ctrl media/207:0215-0559-0582:c:5/5 z:43/81 - ctrl media/207	33.18	50.47
220120 C1-PARD6B C2-GATA3 C3-DAPI BF C4-FACTIN 7.5uM U73122 treatment DMSO media ctrl.lif - ctrl media/207:0215-0697-0417:c:5/5 z:43/81 - ctrl media/207	55.59	52.01	1.6744	1.10261
220120 C1-PARD6B C2-GATA3 C3-DAPI BF C4-FACTIN 7.5uM U73122 treatment DMSO media ctrl.lif - ctrl media/207:0215-0721-0418:c:5/5 z:43/81 - ctrl media/207	24.32	50.07
220120 C1-PARD6B C2-GATA3 C3-DAPI BF C4-FACTIN 7.5uM U73122 treatment DMSO media ctrl.lif - ctrl media/207:0215-0671-0445:c:5/5 z:43/81 - ctrl media/207	33.2	47.17
220120 C1-PARD6B C2-GATA3 C3-DAPI BF C4-FACTIN 7.5uM U73122 treatment DMSO media ctrl.lif - ctrl media/207:0215-0714-0536:c:5/5 z:43/81 - ctrl media/207	145.97	52.64	5.05611	1.21207
220120 C1-PARD6B C2-GATA3 C3-DAPI BF C4-FACTIN 7.5uM U73122 treatment DMSO media ctrl.lif - ctrl media/207:0215-0682-0514:c:5/5 z:43/81 - ctrl media/207	30.57	30.91
220120 C1-PARD6B C2-GATA3 C3-DAPI BF C4-FACTIN 7.5uM U73122 treatment DMSO media ctrl.lif - ctrl media/207:0215-0600-0465:c:5/5 z:43/81 - ctrl media/207	28.87	43.43
apical		47.96		0.959008
cytoplasm		50.15
basal		50.01
Embryo 206
220120 C1-PARD6B C2-GATA3 C3-DAPI BF C4-FACTIN 7.5uM U73122 treatment DMSO media ctrl.lif - ctrl media/206:0135-0444-0688:c:5/5 z:27/81 - ctrl media/206	37.27	79.03	0.748394	1.72366	0.770846	1.67143
220120 C1-PARD6B C2-GATA3 C3-DAPI BF C4-FACTIN 7.5uM U73122 treatment DMSO media ctrl.lif - ctrl media/206:0135-0459-0692:c:5/5 z:27/81 - ctrl media/206	18.4	38.23
220120 C1-PARD6B C2-GATA3 C3-DAPI BF C4-FACTIN 7.5uM U73122 treatment DMSO media ctrl.lif - ctrl media/206:0135-0453-0641:c:5/5 z:27/81 - ctrl media/206	49.8	45.85
220120 C1-PARD6B C2-GATA3 C3-DAPI BF C4-FACTIN 7.5uM U73122 treatment DMSO media ctrl.lif - ctrl media/206:0135-0574-0716:c:5/5 z:27/81 - ctrl media/206	49.85	76.66	0.769171	2.09282
220120 C1-PARD6B C2-GATA3 C3-DAPI BF C4-FACTIN 7.5uM U73122 treatment DMSO media ctrl.lif - ctrl media/206:0135-0573-0696:c:5/5 z:27/81 - ctrl media/206	37.37	34.28
220120 C1-PARD6B C2-GATA3 C3-DAPI BF C4-FACTIN 7.5uM U73122 treatment DMSO media ctrl.lif - ctrl media/206:0135-0626-0654:c:5/5 z:27/81 - ctrl media/206	64.81	36.63
220120 C1-PARD6B C2-GATA3 C3-DAPI BF C4-FACTIN 7.5uM U73122 treatment DMSO media ctrl.lif - ctrl media/206:0135-0680-0636:c:5/5 z:27/81 - ctrl media/206	52.76	65.05	0.915972	1.60498
220120 C1-PARD6B C2-GATA3 C3-DAPI BF C4-FACTIN 7.5uM U73122 treatment DMSO media ctrl.lif - ctrl media/206:0135-0684-0627:c:5/5 z:27/81 - ctrl media/206	35.36	29.72
220120 C1-PARD6B C2-GATA3 C3-DAPI BF C4-FACTIN 7.5uM U73122 treatment DMSO media ctrl.lif - ctrl media/206:0135-0661-0587:c:5/5 z:27/81 - ctrl media/206	57.6	40.53
220120 C1-PARD6B C2-GATA3 C3-DAPI BF C4-FACTIN 7.5uM U73122 treatment DMSO media ctrl.lif - ctrl media/206:0135-0665-0389:c:5/5 z:27/81 - ctrl media/206	65.76	40.36	0.869151	1.26362
220120 C1-PARD6B C2-GATA3 C3-DAPI BF C4-FACTIN 7.5uM U73122 treatment DMSO media ctrl.lif - ctrl media/206:0135-0676-0407:c:5/5 z:27/81 - ctrl media/206	34.41	25.07
220120 C1-PARD6B C2-GATA3 C3-DAPI BF C4-FACTIN 7.5uM U73122 treatment DMSO media ctrl.lif - ctrl media/206:0135-0599-0351:c:5/5 z:27/81 - ctrl media/206	75.66	31.94
220120 C1-PARD6B C2-GATA3 C3-DAPI BF C4-FACTIN 7.5uM U73122 treatment DMSO media ctrl.lif - ctrl media/206:0135-0529-0299:c:5/5 z:27/81 - ctrl media/206	53.88	82.16	0.551541	1.82618
220120 C1-PARD6B C2-GATA3 C3-DAPI BF C4-FACTIN 7.5uM U73122 treatment DMSO media ctrl.lif - ctrl media/206:0135-0518-0310:c:5/5 z:27/81 - ctrl media/206	39.16	42.75
220120 C1-PARD6B C2-GATA3 C3-DAPI BF C4-FACTIN 7.5uM U73122 treatment DMSO media ctrl.lif - ctrl media/206:0135-0450-0340:c:5/5 z:27/81 - ctrl media/206	97.69	44.99
apical		35.4		0.868073
cytoplasm		34.1
basal		40.78
apical		47.76		2.3207
cytoplasm		28.06
basal		20.58
Embryo 205
220120 C1-PARD6B C2-GATA3 C3-DAPI BF C4-FACTIN 7.5uM U73122 treatment DMSO media ctrl.lif - ctrl media/205:0205-0732-0595:c:5/5 z:41/113 - ctrl media/205	77.23	38.29	2.15847	1.38032	1.26661	1.37672
220120 C1-PARD6B C2-GATA3 C3-DAPI BF C4-FACTIN 7.5uM U73122 treatment DMSO media ctrl.lif - ctrl media/205:0205-0716-0592:c:5/5 z:41/113 - ctrl media/205	42.62	28.51
220120 C1-PARD6B C2-GATA3 C3-DAPI BF C4-FACTIN 7.5uM U73122 treatment DMSO media ctrl.lif - ctrl media/205:0205-0666-0517:c:5/5 z:41/113 - ctrl media/205	35.78	27.74
220120 C1-PARD6B C2-GATA3 C3-DAPI BF C4-FACTIN 7.5uM U73122 treatment DMSO media ctrl.lif - ctrl media/205:0245-0539-0712:c:5/5 z:52/113 - ctrl media/205	27.93	26.45	0.630474	1.00303
220120 C1-PARD6B C2-GATA3 C3-DAPI BF C4-FACTIN 7.5uM U73122 treatment DMSO media ctrl.lif - ctrl media/205:0245-0574-0717:c:5/5 z:52/113 - ctrl media/205	30.06	19.64
220120 C1-PARD6B C2-GATA3 C3-DAPI BF C4-FACTIN 7.5uM U73122 treatment DMSO media ctrl.lif - ctrl media/205:0245-0631-0715:c:5/5 z:52/113 - ctrl media/205	44.3	26.37
220120 C1-PARD6B C2-GATA3 C3-DAPI BF C4-FACTIN 7.5uM U73122 treatment DMSO media ctrl.lif - ctrl media/205:0245-0455-0435:c:5/5 z:52/113 - ctrl media/205	38.11	37.59	1.18391	1.54374
220120 C1-PARD6B C2-GATA3 C3-DAPI BF C4-FACTIN 7.5uM U73122 treatment DMSO media ctrl.lif - ctrl media/205:0245-0443-0450:c:5/5 z:52/113 - ctrl media/205	26.89	25.79
220120 C1-PARD6B C2-GATA3 C3-DAPI BF C4-FACTIN 7.5uM U73122 treatment DMSO media ctrl.lif - ctrl media/205:0245-0411-0515:c:5/5 z:52/113 - ctrl media/205	32.19	24.35
220120 C1-PARD6B C2-GATA3 C3-DAPI BF C4-FACTIN 7.5uM U73122 treatment DMSO media ctrl.lif - ctrl media/205:0245-0346-0513:c:5/5 z:52/113 - ctrl media/205	34.59	43.24	1.09358	1.50925
220120 C1-PARD6B C2-GATA3 C3-DAPI BF C4-FACTIN 7.5uM U73122 treatment DMSO media ctrl.lif - ctrl media/205:0245-0357-0548:c:5/5 z:52/113 - ctrl media/205	29.19	45.89
220120 C1-PARD6B C2-GATA3 C3-DAPI BF C4-FACTIN 7.5uM U73122 treatment DMSO media ctrl.lif - ctrl media/205:0245-0415-0514:c:5/5 z:52/113 - ctrl media/205	31.63	28.65
apical		65.98		1.44725
cytoplasm		52.76
basal		45.59
Embryo 204
220120 C1-PARD6B C2-GATA3 C3-DAPI BF C4-FACTIN 7.5uM U73122 treatment DMSO media ctrl.lif - ctrl media/204:0355-0344-0707:c:5/5 z:71/113 - ctrl media/204	42.02	64.49	4.67929	3.0622	4.7521	1.7294
220120 C1-PARD6B C2-GATA3 C3-DAPI BF C4-FACTIN 7.5uM U73122 treatment DMSO media ctrl.lif - ctrl media/204:0355-0352-0699:c:5/5 z:71/113 - ctrl media/204	13.62	35.08
220120 C1-PARD6B C2-GATA3 C3-DAPI BF C4-FACTIN 7.5uM U73122 treatment DMSO media ctrl.lif - ctrl media/204:0355-0321-0657:c:5/5 z:71/113 - ctrl media/204	8.98	21.06
220120 C1-PARD6B C2-GATA3 C3-DAPI BF C4-FACTIN 7.5uM U73122 treatment DMSO media ctrl.lif - ctrl media/204:0355-0436-0746:c:5/5 z:71/113 - ctrl media/204	72.64	65.66	2.85984	0.764733
220120 C1-PARD6B C2-GATA3 C3-DAPI BF C4-FACTIN 7.5uM U73122 treatment DMSO media ctrl.lif - ctrl media/204:0355-0425-0704:c:5/5 z:71/113 - ctrl media/204	12.27	58.12
220120 C1-PARD6B C2-GATA3 C3-DAPI BF C4-FACTIN 7.5uM U73122 treatment DMSO media ctrl.lif - ctrl media/204:0355-0404-0707:c:5/5 z:71/113 - ctrl media/204	25.4	85.86
220120 C1-PARD6B C2-GATA3 C3-DAPI BF C4-FACTIN 7.5uM U73122 treatment DMSO media ctrl.lif - ctrl media/204:0355-0504-0735:c:5/5 z:71/113 - ctrl media/204	75.21	64.95	4.10535	0.606896
220120 C1-PARD6B C2-GATA3 C3-DAPI BF C4-FACTIN 7.5uM U73122 treatment DMSO media ctrl.lif - ctrl media/204:0355-0489-0694:c:5/5 z:71/113 - ctrl media/204	11.73	30.87
220120 C1-PARD6B C2-GATA3 C3-DAPI BF C4-FACTIN 7.5uM U73122 treatment DMSO media ctrl.lif - ctrl media/204:0355-0479-0643:c:5/5 z:71/113 - ctrl media/204	18.32	107.02
220120 C1-PARD6B C2-GATA3 C3-DAPI BF C4-FACTIN 7.5uM U73122 treatment DMSO media ctrl.lif - ctrl media/204:0305-0601-0692:c:5/5 z:61/113 - ctrl media/204	100.5	79.35	6.79513	2.55391
220120 C1-PARD6B C2-GATA3 C3-DAPI BF C4-FACTIN 7.5uM U73122 treatment DMSO media ctrl.lif - ctrl media/204:0305-0568-0691:c:5/5 z:61/113 - ctrl media/204	22.68	41.67
220120 C1-PARD6B C2-GATA3 C3-DAPI BF C4-FACTIN 7.5uM U73122 treatment DMSO media ctrl.lif - ctrl media/204:0305-0516-0655:c:5/5 z:61/113 - ctrl media/204	14.79	31.07
220120 C1-PARD6B C2-GATA3 C3-DAPI BF C4-FACTIN 7.5uM U73122 treatment DMSO media ctrl.lif - ctrl media/204:0305-0683-0601:c:5/5 z:61/113 - ctrl media/204	94.02	75.74	5.32088	1.57039
220120 C1-PARD6B C2-GATA3 C3-DAPI BF C4-FACTIN 7.5uM U73122 treatment DMSO media ctrl.lif - ctrl media/204:0305-0640-0584:c:5/5 z:61/113 - ctrl media/204	8.28	35.87
220120 C1-PARD6B C2-GATA3 C3-DAPI BF C4-FACTIN 7.5uM U73122 treatment DMSO media ctrl.lif - ctrl media/204:0305-0619-0608:c:5/5 z:61/113 - ctrl media/204	17.67	48.23
apical		92.04		1.81825
cytoplasm		44.85
basal		50.62
Embryo 203
220120 C1-PARD6B C2-GATA3 C3-DAPI BF C4-FACTIN 7.5uM U73122 treatment DMSO media ctrl.lif - ctrl media/203:0175-0602-0685:c:5/5 z:35/90 - ctrl media/203	58.03	39.58	1.37187	1.00152	1.03125	1.14131
220120 C1-PARD6B C2-GATA3 C3-DAPI BF C4-FACTIN 7.5uM U73122 treatment DMSO media ctrl.lif - ctrl media/203:0175-0588-0656:c:5/5 z:35/90 - ctrl media/203	42.54	32.64
220120 C1-PARD6B C2-GATA3 C3-DAPI BF C4-FACTIN 7.5uM U73122 treatment DMSO media ctrl.lif - ctrl media/203:0175-0538-0632:c:5/5 z:35/90 - ctrl media/203	42.3	39.52
220120 C1-PARD6B C2-GATA3 C3-DAPI BF C4-FACTIN 7.5uM U73122 treatment DMSO media ctrl.lif - ctrl media/203:0175-0725-0549:c:5/5 z:35/90 - ctrl media/203	51.39	43.23	0.749235	1.13435
220120 C1-PARD6B C2-GATA3 C3-DAPI BF C4-FACTIN 7.5uM U73122 treatment DMSO media ctrl.lif - ctrl media/203:0175-0713-0574:c:5/5 z:35/90 - ctrl media/203	59.18	31.73
220120 C1-PARD6B C2-GATA3 C3-DAPI BF C4-FACTIN 7.5uM U73122 treatment DMSO media ctrl.lif - ctrl media/203:0175-0654-0533:c:5/5 z:35/90 - ctrl media/203	68.59	38.11
220120 C1-PARD6B C2-GATA3 C3-DAPI BF C4-FACTIN 7.5uM U73122 treatment DMSO media ctrl.lif - ctrl media/203:0175-0445-0640:c:5/5 z:35/90 - ctrl media/203	34.15	45.36	1.297	1.20478
220120 C1-PARD6B C2-GATA3 C3-DAPI BF C4-FACTIN 7.5uM U73122 treatment DMSO media ctrl.lif - ctrl media/203:0175-0486-0638:c:5/5 z:35/90 - ctrl media/203	39.5	51.85
220120 C1-PARD6B C2-GATA3 C3-DAPI BF C4-FACTIN 7.5uM U73122 treatment DMSO media ctrl.lif - ctrl media/203:0175-0416-0549:c:5/5 z:35/90 - ctrl media/203	26.33	37.65
220120 C1-PARD6B C2-GATA3 C3-DAPI BF C4-FACTIN 7.5uM U73122 treatment DMSO media ctrl.lif - ctrl media/203:0145-0351-0577:c:5/5 z:29/90 - ctrl media/203	45.56	40	1.25406	1.32714
220120 C1-PARD6B C2-GATA3 C3-DAPI BF C4-FACTIN 7.5uM U73122 treatment DMSO media ctrl.lif - ctrl media/203:0145-0372-0525:c:5/5 z:29/90 - ctrl media/203	31.52	31.01
220120 C1-PARD6B C2-GATA3 C3-DAPI BF C4-FACTIN 7.5uM U73122 treatment DMSO media ctrl.lif - ctrl media/203:0145-0414-0577:c:5/5 z:29/90 - ctrl media/203	36.33	30.14
220120 C1-PARD6B C2-GATA3 C3-DAPI BF C4-FACTIN 7.5uM U73122 treatment DMSO media ctrl.lif - ctrl media/203:0145-0459-0654:c:5/5 z:29/90 - ctrl media/203	33.89	34.84	0.745655	1.10744
220120 C1-PARD6B C2-GATA3 C3-DAPI BF C4-FACTIN 7.5uM U73122 treatment DMSO media ctrl.lif - ctrl media/203:0145-0502-0646:c:5/5 z:29/90 - ctrl media/203	42.38	30.32
220120 C1-PARD6B C2-GATA3 C3-DAPI BF C4-FACTIN 7.5uM U73122 treatment DMSO media ctrl.lif - ctrl media/203:0145-0553-0635:c:5/5 z:29/90 - ctrl media/203	45.45	31.46
220120 C1-PARD6B C2-GATA3 C3-DAPI BF C4-FACTIN 7.5uM U73122 treatment DMSO media ctrl.lif - ctrl media/203:0095-0687-0451:c:5/5 z:18/90 - ctrl media/203	67.32	33.97	0.713589	1.07262
220120 C1-PARD6B C2-GATA3 C3-DAPI BF C4-FACTIN 7.5uM U73122 treatment DMSO media ctrl.lif - ctrl media/203:0095-0706-0478:c:5/5 z:18/90 - ctrl media/203	10.39	32.77
220120 C1-PARD6B C2-GATA3 C3-DAPI BF C4-FACTIN 7.5uM U73122 treatment DMSO media ctrl.lif - ctrl media/203:0095-0618-0401:c:5/5 z:18/90 - ctrl media/203	94.34	31.67
220120 C1-PARD6B C2-GATA3 C3-DAPI BF C4-FACTIN 7.5uM U73122 treatment DMSO media ctrl.lif - ctrl media/203:0095-0517-0306:c:5/5 z:18/90 - ctrl media/203	61.63		1.08733
220120 C1-PARD6B C2-GATA3 C3-DAPI BF C4-FACTIN 7.5uM U73122 treatment DMSO media ctrl.lif - ctrl media/203:0095-0499-0320:c:5/5 z:18/90 - ctrl media/203	37.55
220120 C1-PARD6B C2-GATA3 C3-DAPI BF C4-FACTIN 7.5uM U73122 treatment DMSO media ctrl.lif - ctrl media/203:0095-0419-0402:c:5/5 z:18/90 - ctrl media/203	56.68

## Sheet: Fig 1j
LENGTH RATIO VERSUS TOTAL CELL NUMBER
Embryo No.	Length measurement	Length ratio Pard6/F-actin	Total cell number in the embryo	average length ratio
Embryo 19
F-actin length	42.7	1	23	0.9616
Pard6 length	42.7
180914 2 9 24h Par6.lif - 24h/19:0267-0153-0309:c:3/4 z:67/133 - 24h/19	42.95	1
180914 2 9 24h Par6.lif - 24h/19:0268-0153-0309:c:4/4 z:67/133 - 24h/19	42.95
180914 2 9 24h Par6.lif - 24h/19:0283-0276-0382:c:3/4 z:71/133 - 24h/19	47.71	0.824146
180914 2 9 24h Par6.lif - 24h/19:0284-0272-0392:c:4/4 z:71/133 - 24h/19	39.32
180914 2 9 24h Par6.lif - 24h/19:0303-0337-0344:c:3/4 z:76/133 - 24h/19	19.09	1
180914 2 9 24h Par6.lif - 24h/19:0304-0337-0344:c:4/4 z:76/133 - 24h/19	19.09
180914 2 9 24h Par6.lif - 24h/19:0203-0279-0286:c:3/4 z:51/133 - 24h/19	66.73	0.945452
180914 2 9 24h Par6.lif - 24h/19:0204-0281-0284:c:4/4 z:51/133 - 24h/19	63.09
180914 2 9 24h Par6.lif - 24h/19:0343-0158-0332:c:3/4 z:86/133 - 24h/19	57.25	1
180914 2 9 24h Par6.lif - 24h/19:0344-0158-0332:c:4/4 z:86/133 - 24h/19	57.25
Embryo 17
180914 2 9 24h Par6.lif - 24h/17:0379-0117-0262:c:3/4 z:95/133 - 24h/17	51.2	1	15	1.00051
180914 2 9 24h Par6.lif - 24h/17:0380-0117-0262:c:4/4 z:95/133 - 24h/17	51.2
180914 2 9 24h Par6.lif - 24h/17:0359-0193-0329:c:3/4 z:90/133 - 24h/17	59.85	1
180914 2 9 24h Par6.lif - 24h/17:0360-0193-0329:c:4/4 z:90/133 - 24h/17	59.85
180914 2 9 24h Par6.lif - 24h/17:0391-0164-0159:c:3/4 z:98/133 - 24h/17	88.41	1
180914 2 9 24h Par6.lif - 24h/17:0392-0164-0159:c:4/4 z:98/133 - 24h/17	88.41
180914 2 9 24h Par6.lif - 24h/17:0323-0312-0222:c:3/4 z:81/133 - 24h/17	58.13	1
180914 2 9 24h Par6.lif - 24h/17:0324-0312-0222:c:4/4 z:81/133 - 24h/17	58.13
180914 2 9 24h Par6.lif - 24h/17:0323-0270-0307:c:3/4 z:81/133 - 24h/17	34.67	1
180914 2 9 24h Par6.lif - 24h/17:0324-0270-0307:c:4/4 z:81/133 - 24h/17	34.67
180914 2 9 24h Par6.lif - 24h/17:0331-0258-0137:c:3/4 z:82/133 - 24h/17	47.57	1
180914 2 9 24h Par6.lif - 24h/17:0328-0258-0137:c:4/4 z:82/133 - 24h/17	47.57
180914 2 9 24h Par6.lif - 24h/17:0483-0184-0175:c:3/4 z:121/133 - 24h/17	60.46	1.00463
180914 2 9 24h Par6.lif - 24h/17:0484-0185-0173:c:4/4 z:121/133 - 24h/17	60.74
180914 2 9 24h Par6.lif - 24h/17:0459-0274-0157:c:3/4 z:115/133 - 24h/17	42.98	1
180914 2 9 24h Par6.lif - 24h/17:0460-0274-0157:c:4/4 z:115/133 - 24h/17	42.98
180914 2 9 24h Par6.lif - 24h/17:0355-0193-0329:c:3/4 z:89/133 - 24h/17	58.83	1
180914 2 9 24h Par6.lif - 24h/17:0356-0193-0329:c:4/4 z:89/133 - 24h/17	58.83
Embryo 16
180914 2 9 24h Par6.lif - 24h/16:0407-0097-0198:c:3/4 z:102/133 - 24h/16	41.17	1	19	1
180914 2 9 24h Par6.lif - 24h/16:0408-0097-0198:c:4/4 z:102/133 - 24h/16	41.17
180914 2 9 24h Par6.lif - 24h/16:0407-0135-0264:c:3/4 z:102/133 - 24h/16	37.74	1
180914 2 9 24h Par6.lif - 24h/16:0408-0135-0264:c:4/4 z:102/133 - 24h/16	37.74
180914 2 9 24h Par6.lif - 24h/16:0396-0168-0160:c:4/4 z:100/133 - 24h/16	64.93	1
180914 2 9 24h Par6.lif - 24h/16:0399-0168-0160:c:3/4 z:100/133 - 24h/16	64.93
180914 2 9 24h Par6.lif - 24h/16:0363-0195-0236:c:3/4 z:92/133 - 24h/16	59.21	1
180914 2 9 24h Par6.lif - 24h/16:0368-0195-0236:c:4/4 z:92/133 - 24h/16	59.21
180914 2 9 24h Par6.lif - 24h/16:0463-0135-0144:c:3/4 z:116/133 - 24h/16	40.31	1
180914 2 9 24h Par6.lif - 24h/16:0464-0135-0144:c:4/4 z:116/133 - 24h/16	40.31
180914 2 9 24h Par6.lif - 24h/16:0448-0122-0225:c:4/4 z:112/133 - 24h/16	63.29	1
180914 2 9 24h Par6.lif - 24h/16:0447-0122-0225:c:3/4 z:112/133 - 24h/16	63.29
Embryo 13
180914 2 9 24h Par6.lif - 24h/13:0383-0201-0301:c:3/4 z:96/133 - 24h/13	61.22	1	17	0.987225
180914 2 9 24h Par6.lif - 24h/13:0384-0201-0301:c:4/4 z:96/133 - 24h/13	61.22
180914 2 9 24h Par6.lif - 24h/13:0384-0276-0358:c:4/4 z:96/133 - 24h/13	38.75	1
180914 2 9 24h Par6.lif - 24h/13:0383-0276-0358:c:3/4 z:96/133 - 24h/13	38.75
180914 2 9 24h Par6.lif - 24h/13:0424-0238-0179:c:4/4 z:106/133 - 24h/13	94.53	0.975352
180914 2 9 24h Par6.lif - 24h/13:0423-0235-0176:c:3/4 z:106/133 - 24h/13	92.2
180914 2 9 24h Par6.lif - 24h/13:0363-0272-0358:c:3/4 z:91/133 - 24h/13	32.18	1
180914 2 9 24h Par6.lif - 24h/13:0364-0272-0358:c:4/4 z:91/133 - 24h/13	32.18
180914 2 9 24h Par6.lif - 24h/13:0363-0343-0317:c:3/4 z:91/133 - 24h/13	41.99	0.935223
180914 2 9 24h Par6.lif - 24h/13:0364-0345-0318:c:4/4 z:91/133 - 24h/13	39.27
180914 2 9 24h Par6.lif - 24h/13:0319-0354-0266:c:3/4 z:80/133 - 24h/13	52.96	1
180914 2 9 24h Par6.lif - 24h/13:0320-0354-0266:c:4/4 z:80/133 - 24h/13	52.96
180914 2 9 24h Par6.lif - 24h/13:0319-0301-0337:c:3/4 z:80/133 - 24h/13	36.9	1
180914 2 9 24h Par6.lif - 24h/13:0320-0301-0337:c:4/4 z:80/133 - 24h/13	36.9
Embryo 8
180914 2 9 24h Par6.lif - 24h/8:0531-0197-0293:c:3/4 z:133/133 - 24h/8	61	0.815246	16	0.364778
180914 2 9 24h Par6.lif - 24h/8:0532-0192-0299:c:4/4 z:133/133 - 24h/8	49.73
180914 2 9 24h Par6.lif - 24h/8:0416-0226-0336:c:4/4 z:104/133 - 24h/8	64.59	0.618672
180914 2 9 24h Par6.lif - 24h/8:0416-0227-0362:c:4/4 z:104/133 - 24h/8	39.96
180914 2 9 24h Par6.lif - 24h/8:0415-0174-0232:c:3/4 z:104/133 - 24h/8	45.72	0.0168416
180914 2 9 24h Par6.lif - 24h/8:0408-0163-0231:c:4/4 z:104/133 - 24h/8	0.77
180914 2 9 24h Par6.lif - 24h/8:0420-0354-0150:c:4/4 z:105/133 - 24h/8	51.82	0.431108
180914 2 9 24h Par6.lif - 24h/8:0420-0382-0147:c:4/4 z:105/133 - 24h/8	22.34
180914 2 9 24h Par6.lif - 24h/8:0475-0206-0298:c:3/4 z:119/133 - 24h/8	43.23	0.570206
180914 2 9 24h Par6.lif - 24h/8:0476-0198-0312:c:4/4 z:119/133 - 24h/8	24.65
180914 2 9 24h Par6.lif - 24h/8:0412-0242-0149:c:4/4 z:103/133 - 24h/8	57.45	0.0560487
180914 2 9 24h Par6.lif - 24h/8:0412-0228-0130:c:4/4 z:103/133 - 24h/8	3.22
180914 2 9 24h Par6.lif - 24h/8:0411-0173-0232:c:3/4 z:103/133 - 24h/8	44.35	0.0453213
180914 2 9 24h Par6.lif - 24h/8:0412-0163-0237:c:4/4 z:103/133 - 24h/8	2.01
Embryo 7
180914 2 9 24h Par6.lif - 24h/7:0359-0330-0200:c:3/4 z:90/133 - 24h/7	21.48	0.883613	15	0.734774
180914 2 9 24h Par6.lif - 24h/7:0360-0334-0201:c:4/4 z:90/133 - 24h/7	18.98
180914 2 9 24h Par6.lif - 24h/7:0343-0225-0170:c:3/4 z:86/133 - 24h/7	24.26	0.65169
180914 2 9 24h Par6.lif - 24h/7:0344-0224-0167:c:4/4 z:86/133 - 24h/7	15.81
180914 2 9 24h Par6.lif - 24h/7:0415-0267-0158:c:3/4 z:104/133 - 24h/7	36.34	0.533572
180914 2 9 24h Par6.lif - 24h/7:0416-0280-0155:c:4/4 z:104/133 - 24h/7	19.39
180914 2 9 24h Par6.lif - 24h/7:0415-0340-0273:c:3/4 z:104/133 - 24h/7	92.85	0.870221
180914 2 9 24h Par6.lif - 24h/7:0416-0344-0257:c:4/4 z:104/133 - 24h/7	80.8
Embryo 6
180914 2 9 24h Gata3 Factin Par6.lif - 24h/6:0227-0315-0400:c:2/5 z:46/84 - 24h/6	53.86	0.839027	19	0.91973
180914 2 9 24h Gata3 Factin Par6.lif - 24h/6:0228-0291-0401:c:3/5 z:46/84 - 24h/6	45.19
180914 2 9 24h Gata3 Factin Par6.lif - 24h/6:0212-0349-0567:c:2/5 z:43/84 - 24h/6	47.55	0.858254
180914 2 9 24h Gata3 Factin Par6.lif - 24h/6:0213-0342-0578:c:3/5 z:43/84 - 24h/6	40.81
180914 2 9 24h Gata3 Factin Par6.lif - 24h/6:0242-0440-0298:c:2/5 z:49/84 - 24h/6	23.73	0.931732
180914 2 9 24h Gata3 Factin Par6.lif - 24h/6:0243-0437-0292:c:3/5 z:49/84 - 24h/6	22.11
180914 2 9 24h Gata3 Factin Par6.lif - 24h/6:0262-0631-0643:c:2/5 z:54/84 - 24h/6	56.91	1.01915
180914 2 9 24h Gata3 Factin Par6.lif - 24h/6:0268-0633-0648:c:3/5 z:54/84 - 24h/6	58
180914 2 9 24h Gata3 Factin Par6.lif - 24h/6:0238-0490-0709:c:3/5 z:48/84 - 24h/6	28.03	0.988584
180914 2 9 24h Gata3 Factin Par6.lif - 24h/6:0238-0487-0709:c:3/5 z:48/84 - 24h/6	27.71
180914 2 9 24h Gata3 Factin Par6.lif - 24h/6:0212-0356-0566:c:2/5 z:43/84 - 24h/6	49.76	0.881632
180914 2 9 24h Gata3 Factin Par6.lif - 24h/6:0213-0342-0570:c:3/5 z:43/84 - 24h/6	43.87
Embryo 12
180914 2 9 24h Par6.lif - 9h/12:0235-0373-0205:c:3/4 z:59/106 - 9h/12	47.28	0.446066	15	0.2519
180914 2 9 24h Par6.lif - 9h/12:0236-0375-0183:c:4/4 z:59/106 - 9h/12	21.09
180914 2 9 24h Par6.lif - 9h/12:0155-0346-0260:c:3/4 z:39/106 - 9h/12	54.02	0.262866
180914 2 9 24h Par6.lif - 9h/12:0156-0370-0257:c:4/4 z:39/106 - 9h/12	14.2
180914 2 9 24h Par6.lif - 9h/12:0175-0199-0284:c:3/4 z:44/106 - 9h/12	59.93	0.0302019
180914 2 9 24h Par6.lif - 9h/12:0176-0172-0299:c:4/4 z:44/106 - 9h/12	1.81
180914 2 9 24h Par6.lif - 9h/12:0211-0285-0326:c:3/4 z:53/106 - 9h/12	71.15	0.123682
180914 2 9 24h Par6.lif - 9h/12:0212-0294-0362:c:4/4 z:53/106 - 9h/12	8.8
180914 2 9 24h Par6.lif - 9h/12:0315-0218-0100:c:3/4 z:79/106 - 9h/12	66.14	0.360599
180914 2 9 24h Par6.lif - 9h/12:0316-0240-0078:c:4/4 z:79/106 - 9h/12	23.85
180914 2 9 24h Par6.lif - 9h/12:0296-0321-0154:c:4/4 z:74/106 - 9h/12	54.76	0.287984
180914 2 9 24h Par6.lif - 9h/12:0296-0342-0133:c:4/4 z:74/106 - 9h/12	15.77
Embryo 5
180914 2 9 24h Par6.lif - 9h/5:0251-0360-0156:c:3/4 z:63/106 - 9h/5	70.23	0.401111	9	0.153226
180914 2 9 24h Par6.lif - 9h/5:0252-0400-0150:c:4/4 z:63/106 - 9h/5	28.17
180914 2 9 24h Par6.lif - 9h/5:0311-0296-0345:c:3/4 z:78/106 - 9h/5	84.05	0.066865
180914 2 9 24h Par6.lif - 9h/5:0312-0289-0381:c:4/4 z:78/106 - 9h/5	5.62
180914 2 9 24h Par6.lif - 9h/5:0196-0264-0191:c:4/4 z:49/106 - 9h/5	60.49	0.140188
180914 2 9 24h Par6.lif - 9h/5:0196-0229-0194:c:4/4 z:49/106 - 9h/5	8.48
180914 2 9 24h Par6.lif - 9h/5:0196-0324-0336:c:4/4 z:49/106 - 9h/5	55.34	0.0598121
180914 2 9 24h Par6.lif - 9h/5:0196-0350-0350:c:4/4 z:49/106 - 9h/5	3.31
180914 2 9 24h Par6.lif - 9h/5:0315-0267-0138:c:3/4 z:79/106 - 9h/5	76.41	0.0981547
180914 2 9 24h Par6.lif - 9h/5:0316-0269-0099:c:4/4 z:79/106 - 9h/5	7.5
Embryo 4
180914 2 9 24h Par6.lif - 24h/4:0415-0265-0131:c:3/4 z:104/133 - 24h/4	59.01	0.546348	28	0.902943
180914 2 9 24h Par6.lif - 24h/4:0416-0260-0113:c:4/4 z:104/133 - 24h/4	32.24
180914 2 9 24h Par6.lif - 24h/4:0364-0347-0201:c:4/4 z:92/133 - 24h/4	54.95	0.95141
180914 2 9 24h Par6.lif - 24h/4:0384-0350-0198:c:4/4 z:96/133 - 24h/4	52.28
180914 2 9 24h Par6.lif - 24h/4:0384-0365-0275:c:4/4 z:96/133 - 24h/4	24.54	0.997148
180914 2 9 24h Par6.lif - 24h/4:0384-0366-0275:c:4/4 z:96/133 - 24h/4	24.47
180914 2 9 24h Par6.lif - 24h/4:0384-0197-0329:c:4/4 z:96/133 - 24h/4	86.33	0.873277
180914 2 9 24h Par6.lif - 24h/4:0384-0195-0340:c:4/4 z:96/133 - 24h/4	75.39
180914 2 9 24h Par6.lif - 24h/4:0384-0314-0337:c:4/4 z:96/133 - 24h/4	48.34	1
180914 2 9 24h Par6.lif - 24h/4:0384-0314-0337:c:4/4 z:96/133 - 24h/4	48.34
180914 2 9 24h Par6.lif - 24h/4:0500-0183-0212:c:4/4 z:126/133 - 24h/4	62.37	0.988135
180914 2 9 24h Par6.lif - 24h/4:0500-0184-0210:c:4/4 z:126/133 - 24h/4	61.63
180914 2 9 24h Par6.lif - 24h/4:0500-0150-0294:c:4/4 z:126/133 - 24h/4	34.72	0.964286
180914 2 9 24h Par6.lif - 24h/4:0500-0149-0292:c:4/4 z:126/133 - 24h/4	33.48
Embryo 87
20181227 c1 phalloidin c2 pard6 c3 gata3.lif - control inhibitor/87:0198-0211-0614:c:3/5 z:40/71 - control inhibitor/87	46.02	0.83116	18	0.896063
20181227 c1 phalloidin c2 pard6 c3 gata3.lif - control inhibitor/87:0199-0196-0616:c:4/5 z:40/71 - control inhibitor/87	38.25
20181227 c1 phalloidin c2 pard6 c3 gata3.lif - control inhibitor/87:0159-0362-0708:c:4/5 z:32/71 - control inhibitor/87	53.6	1
20181227 c1 phalloidin c2 pard6 c3 gata3.lif - control inhibitor/87:0159-0362-0708:c:4/5 z:32/71 - control inhibitor/87	53.6
20181227 c1 phalloidin c2 pard6 c3 gata3.lif - control inhibitor/87:0194-0603-0338:c:4/5 z:39/71 - control inhibitor/87	67.72	1
20181227 c1 phalloidin c2 pard6 c3 gata3.lif - control inhibitor/87:0193-0603-0338:c:3/5 z:39/71 - control inhibitor/87	67.72
20181227 c1 phalloidin c2 pard6 c3 gata3.lif - control inhibitor/87:0193-0609-0551:c:3/5 z:39/71 - control inhibitor/87	47.18	0.824714
20181227 c1 phalloidin c2 pard6 c3 gata3.lif - control inhibitor/87:0194-0624-0546:c:4/5 z:39/71 - control inhibitor/87	38.91
20181227 c1 phalloidin c2 pard6 c3 gata3.lif - control inhibitor/87:0233-0530-0639:c:3/5 z:47/71 - control inhibitor/87	26.66	0.865341
20181227 c1 phalloidin c2 pard6 c3 gata3.lif - control inhibitor/87:0234-0532-0648:c:4/5 z:47/71 - control inhibitor/87	23.07
20181227 c1 phalloidin c2 pard6 c3 gata3.lif - control inhibitor/87:0234-0392-0687:c:4/5 z:47/71 - control inhibitor/87	31	0.855161
20181227 c1 phalloidin c2 pard6 c3 gata3.lif - control inhibitor/87:0234-0386-0695:c:4/5 z:47/71 - control inhibitor/87	26.51
Embryo 81
20181227 c1 phalloidin c2 pard6 c3 gata3.lif - control inhibitor/81:0188-0199-0463:c:3/5 z:38/78 - control inhibitor/81	52.9	0.588469	9	0.607418
20181227 c1 phalloidin c2 pard6 c3 gata3.lif - control inhibitor/81:0189-0179-0444:c:4/5 z:38/78 - control inhibitor/81	31.13
20181227 c1 phalloidin c2 pard6 c3 gata3.lif - control inhibitor/81:0213-0371-0311:c:3/5 z:44/78 - control inhibitor/81	76.05	0.928731
20181227 c1 phalloidin c2 pard6 c3 gata3.lif - control inhibitor/81:0219-0371-0318:c:4/5 z:44/78 - control inhibitor/81	70.63
20181227 c1 phalloidin c2 pard6 c3 gata3.lif - control inhibitor/81:0188-0708-0452:c:3/5 z:38/78 - control inhibitor/81	78.7	0.38399
20181227 c1 phalloidin c2 pard6 c3 gata3.lif - control inhibitor/81:0189-0801-0462:c:4/5 z:38/78 - control inhibitor/81	30.22
20181227 c1 phalloidin c2 pard6 c3 gata3.lif - control inhibitor/81:0188-0524-0823:c:3/5 z:38/78 - control inhibitor/81	78.73	0.391592
20181227 c1 phalloidin c2 pard6 c3 gata3.lif - control inhibitor/81:0189-0582-0856:c:4/5 z:38/78 - control inhibitor/81	30.83
20181227 c1 phalloidin c2 pard6 c3 gata3.lif - control inhibitor/81:0208-0278-0679:c:3/5 z:42/78 - control inhibitor/81	67.23	0.744311
20181227 c1 phalloidin c2 pard6 c3 gata3.lif - control inhibitor/81:0209-0264-0709:c:4/5 z:42/78 - control inhibitor/81	50.04
Embryo 80
20181227 c1 phalloidin c2 pard6 c3 gata3.lif - control inhibitor/80:0183-0330-0579:c:3/5 z:37/71 - control inhibitor/80	30.5	0.873115	17	0.980497
20181227 c1 phalloidin c2 pard6 c3 gata3.lif - control inhibitor/80:0184-0327-0584:c:4/5 z:37/71 - control inhibitor/80	26.63
20181227 c1 phalloidin c2 pard6 c3 gata3.lif - control inhibitor/80:0183-0388-0687:c:3/5 z:37/71 - control inhibitor/80	19.07	0.981122
20181227 c1 phalloidin c2 pard6 c3 gata3.lif - control inhibitor/80:0184-0388-0691:c:4/5 z:37/71 - control inhibitor/80	18.71
20181227 c1 phalloidin c2 pard6 c3 gata3.lif - control inhibitor/80:0163-0377-0406:c:3/5 z:33/71 - control inhibitor/80	59.43	1.02978
20181227 c1 phalloidin c2 pard6 c3 gata3.lif - control inhibitor/80:0164-0381-0405:c:4/5 z:33/71 - control inhibitor/80	61.2
20181227 c1 phalloidin c2 pard6 c3 gata3.lif - control inhibitor/80:0163-0562-0262:c:3/5 z:33/71 - control inhibitor/80	39.98	1
20181227 c1 phalloidin c2 pard6 c3 gata3.lif - control inhibitor/80:0164-0562-0262:c:4/5 z:33/71 - control inhibitor/80	39.98
20181227 c1 phalloidin c2 pard6 c3 gata3.lif - control inhibitor/80:0163-0729-0375:c:3/5 z:33/71 - control inhibitor/80	60.9	1
20181227 c1 phalloidin c2 pard6 c3 gata3.lif - control inhibitor/80:0164-0729-0375:c:4/5 z:33/71 - control inhibitor/80	60.9
20181227 c1 phalloidin c2 pard6 c3 gata3.lif - control inhibitor/80:0099-0721-0592:c:4/5 z:20/71 - control inhibitor/80	57.93	0.998964
20181227 c1 phalloidin c2 pard6 c3 gata3.lif - control inhibitor/80:0099-0723-0591:c:4/5 z:20/71 - control inhibitor/80	57.87
Embryo 79
20181227 c1 phalloidin c2 pard6 c3 gata3.lif - control inhibitor/79:0183-0634-0334:c:3/5 z:37/79 - control inhibitor/79	39.35	0.605845	17	0.708149
20181227 c1 phalloidin c2 pard6 c3 gata3.lif - control inhibitor/79:0184-0646-0310:c:4/5 z:37/79 - control inhibitor/79	23.84
20181227 c1 phalloidin c2 pard6 c3 gata3.lif - control inhibitor/79:0218-0569-0548:c:3/5 z:44/79 - control inhibitor/79	43.36	0.752076
20181227 c1 phalloidin c2 pard6 c3 gata3.lif - control inhibitor/79:0219-0596-0544:c:4/5 z:44/79 - control inhibitor/79	32.61
20181227 c1 phalloidin c2 pard6 c3 gata3.lif - control inhibitor/79:0294-0455-0526:c:4/5 z:59/79 - control inhibitor/79	52.64	0.766527
20181227 c1 phalloidin c2 pard6 c3 gata3.lif - control inhibitor/79:0294-0464-0533:c:4/5 z:59/79 - control inhibitor/79	40.35
Embryo 50
20181209 C1-F-actin C2-GATA3 C3-PARD6 BF 9h 2h.lif - 9h/Mark_and_Find 002/50:0207-0134-0582:c:2/5 z:42/71 - 9h/Mark_and_Find 002/50	72.79	0.620552	11	0.539977
20181209 C1-F-actin C2-GATA3 C3-PARD6 BF 9h 2h.lif - 9h/Mark_and_Find 002/50:0208-0101-0605:c:3/5 z:42/71 - 9h/Mark_and_Find 002/50	45.17
20181209 C1-F-actin C2-GATA3 C3-PARD6 BF 9h 2h.lif - 9h/Mark_and_Find 002/50:0272-0178-0389:c:2/5 z:55/71 - 9h/Mark_and_Find 002/50	49.52	0.479604
20181209 C1-F-actin C2-GATA3 C3-PARD6 BF 9h 2h.lif - 9h/Mark_and_Find 002/50:0273-0151-0353:c:3/5 z:55/71 - 9h/Mark_and_Find 002/50	23.75
20181209 C1-F-actin C2-GATA3 C3-PARD6 BF 9h 2h.lif - 9h/Mark_and_Find 002/50:0212-0451-0298:c:2/5 z:43/71 - 9h/Mark_and_Find 002/50	42.73	0.519775
20181209 C1-F-actin C2-GATA3 C3-PARD6 BF 9h 2h.lif - 9h/Mark_and_Find 002/50:0213-0497-0282:c:3/5 z:43/71 - 9h/Mark_and_Find 002/50	22.21
Embryo 46
20181209 C1-F-actin C2-GATA3 C3-PARD6 BF 9h 2h.lif - 9h/Mark_and_Find 002/46:0093-0279-0486:c:3/5 z:18/71 - 9h/Mark_and_Find 002/46	49.22	0.918935	0	0.9104
20181209 C1-F-actin C2-GATA3 C3-PARD6 BF 9h 2h.lif - 9h/Mark_and_Find 002/46:0088-0283-0478:c:3/5 z:18/71 - 9h/Mark_and_Find 002/46	45.23
20181209 C1-F-actin C2-GATA3 C3-PARD6 BF 9h 2h.lif - 9h/Mark_and_Find 002/46:0087-0471-0706:c:2/5 z:18/71 - 9h/Mark_and_Find 002/46	80.28	0.930369
20181209 C1-F-actin C2-GATA3 C3-PARD6 BF 9h 2h.lif - 9h/Mark_and_Find 002/46:0088-0469-0715:c:3/5 z:18/71 - 9h/Mark_and_Find 002/46	74.69
20181209 C1-F-actin C2-GATA3 C3-PARD6 BF 9h 2h.lif - 9h/Mark_and_Find 002/46:0087-0682-0502:c:2/5 z:18/71 - 9h/Mark_and_Find 002/46	57.44	0.917827
20181209 C1-F-actin C2-GATA3 C3-PARD6 BF 9h 2h.lif - 9h/Mark_and_Find 002/46:0088-0686-0504:c:3/5 z:18/71 - 9h/Mark_and_Find 002/46	52.72
20181209 C1-F-actin C2-GATA3 C3-PARD6 BF 9h 2h.lif - 9h/Mark_and_Find 002/46:0132-0615-0359:c:2/5 z:27/71 - 9h/Mark_and_Find 002/46	32.98	0.970588
20181209 C1-F-actin C2-GATA3 C3-PARD6 BF 9h 2h.lif - 9h/Mark_and_Find 002/46:0133-0614-0357:c:3/5 z:27/71 - 9h/Mark_and_Find 002/46	32.01
20181209 C1-F-actin C2-GATA3 C3-PARD6 BF 9h 2h.lif - 9h/Mark_and_Find 002/46:0132-0368-0322:c:2/5 z:27/71 - 9h/Mark_and_Find 002/46	20.9	0.67799
20181209 C1-F-actin C2-GATA3 C3-PARD6 BF 9h 2h.lif - 9h/Mark_and_Find 002/46:0133-0366-0306:c:3/5 z:27/71 - 9h/Mark_and_Find 002/46	14.17
20181209 C1-F-actin C2-GATA3 C3-PARD6 BF 9h 2h.lif - 9h/Mark_and_Find 002/46:0152-0311-0717:c:2/5 z:31/71 - 9h/Mark_and_Find 002/46	58.38	1
20181209 C1-F-actin C2-GATA3 C3-PARD6 BF 9h 2h.lif - 9h/Mark_and_Find 002/46:0153-0311-0717:c:3/5 z:31/71 - 9h/Mark_and_Find 002/46	58.38
20181209 C1-F-actin C2-GATA3 C3-PARD6 BF 9h 2h.lif - 9h/Mark_and_Find 002/46:0152-0188-0539:c:2/5 z:31/71 - 9h/Mark_and_Find 002/46	26.8	0.95709
20181209 C1-F-actin C2-GATA3 C3-PARD6 BF 9h 2h.lif - 9h/Mark_and_Find 002/46:0153-0186-0540:c:3/5 z:31/71 - 9h/Mark_and_Find 002/46	25.65
Embryo 45
20181209 C1-F-actin C2-GATA3 C3-PARD6 BF 9h 2h.lif - 9h/Mark_and_Find 002/45:0132-0255-0485:c:2/5 z:27/71 - 9h/Mark_and_Find 002/45	54.33	0.46917	16	0.53825
20181209 C1-F-actin C2-GATA3 C3-PARD6 BF 9h 2h.lif - 9h/Mark_and_Find 002/45:0133-0219-0499:c:3/5 z:27/71 - 9h/Mark_and_Find 002/45	25.49
20181209 C1-F-actin C2-GATA3 C3-PARD6 BF 9h 2h.lif - 9h/Mark_and_Find 002/45:0132-0612-0696:c:2/5 z:27/71 - 9h/Mark_and_Find 002/45	82.41	0.622012
20181209 C1-F-actin C2-GATA3 C3-PARD6 BF 9h 2h.lif - 9h/Mark_and_Find 002/45:0133-0627-0757:c:3/5 z:27/71 - 9h/Mark_and_Find 002/45	51.26
20181209 C1-F-actin C2-GATA3 C3-PARD6 BF 9h 2h.lif - 9h/Mark_and_Find 002/45:0108-0464-0285:c:3/5 z:22/71 - 9h/Mark_and_Find 002/45	72.2	0.730194
20181209 C1-F-actin C2-GATA3 C3-PARD6 BF 9h 2h.lif - 9h/Mark_and_Find 002/45:0108-0459-0254:c:3/5 z:22/71 - 9h/Mark_and_Find 002/45	52.72
20181209 C1-F-actin C2-GATA3 C3-PARD6 BF 9h 2h.lif - 9h/Mark_and_Find 002/45:0197-0409-0734:c:2/5 z:40/71 - 9h/Mark_and_Find 002/45	44.87	0.331625
20181209 C1-F-actin C2-GATA3 C3-PARD6 BF 9h 2h.lif - 9h/Mark_and_Find 002/45:0198-0381-0774:c:3/5 z:40/71 - 9h/Mark_and_Find 002/45	14.88
Embryo 115
190406 Ctrl DMSO Inhibitor C1 DAPI C2 BF C3 Factin C4 Gata3 C5 Pard6.lif - ctrl/rescan control/115 rescan:0110-0143-0474:c:5/5 z:22/67 - ctrl/rescan control/115 rescan	40.96	1	35	1.16449
190406 Ctrl DMSO Inhibitor C1 DAPI C2 BF C3 Factin C4 Gata3 C5 Pard6.lif - ctrl/rescan control/115 rescan:0110-0143-0474:c:5/5 z:22/67 - ctrl/rescan control/115 rescan	40.96
190406 Ctrl DMSO Inhibitor C1 DAPI C2 BF C3 Factin C4 Gata3 C5 Pard6.lif - ctrl/rescan control/115 rescan:0110-0197-0631:c:5/5 z:22/67 - ctrl/rescan control/115 rescan	35.82	1
190406 Ctrl DMSO Inhibitor C1 DAPI C2 BF C3 Factin C4 Gata3 C5 Pard6.lif - ctrl/rescan control/115 rescan:0110-0197-0631:c:5/5 z:22/67 - ctrl/rescan control/115 rescan	35.82
190406 Ctrl DMSO Inhibitor C1 DAPI C2 BF C3 Factin C4 Gata3 C5 Pard6.lif - ctrl/rescan control/115 rescan:0110-0299-0734:c:5/5 z:22/67 - ctrl/rescan control/115 rescan	25.6	1
190406 Ctrl DMSO Inhibitor C1 DAPI C2 BF C3 Factin C4 Gata3 C5 Pard6.lif - ctrl/rescan control/115 rescan:0110-0299-0734:c:5/5 z:22/67 - ctrl/rescan control/115 rescan	25.6
190406 Ctrl DMSO Inhibitor C1 DAPI C2 BF C3 Factin C4 Gata3 C5 Pard6.lif - ctrl/rescan control/115 rescan:0110-0494-0732:c:5/5 z:22/67 - ctrl/rescan control/115 rescan	73.58	1
190406 Ctrl DMSO Inhibitor C1 DAPI C2 BF C3 Factin C4 Gata3 C5 Pard6.lif - ctrl/rescan control/115 rescan:0110-0494-0732:c:5/5 z:22/67 - ctrl/rescan control/115 rescan	73.58
190406 Ctrl DMSO Inhibitor C1 DAPI C2 BF C3 Factin C4 Gata3 C5 Pard6.lif - ctrl/rescan control/115 rescan:0140-0692-0466:c:5/5 z:28/67 - ctrl/rescan control/115 rescan	52.34	1
190406 Ctrl DMSO Inhibitor C1 DAPI C2 BF C3 Factin C4 Gata3 C5 Pard6.lif - ctrl/rescan control/115 rescan:0140-0692-0466:c:5/5 z:28/67 - ctrl/rescan control/115 rescan	52.34
190406 Ctrl DMSO Inhibitor C1 DAPI C2 BF C3 Factin C4 Gata3 C5 Pard6.lif - ctrl/rescan control/115 rescan:0155-0652-0669:c:5/5 z:31/67 - ctrl/rescan control/115 rescan	29.9	1.98696
190406 Ctrl DMSO Inhibitor C1 DAPI C2 BF C3 Factin C4 Gata3 C5 Pard6.lif - ctrl/rescan control/115 rescan:0155-0476-0774:c:5/5 z:31/67 - ctrl/rescan control/115 rescan	59.41
Embryo 118
190406 Ctrl DMSO Inhibitor C1 DAPI C2 BF C3 Factin C4 Gata3 C5 Pard6.lif - ctrl/rescan control/118 rescan:0193-0432-0709:c:3/5 z:39/61 - ctrl/rescan control/118 rescan	60.22	1	24	1
190406 Ctrl DMSO Inhibitor C1 DAPI C2 BF C3 Factin C4 Gata3 C5 Pard6.lif - ctrl/rescan control/118 rescan:0195-0432-0709:c:5/5 z:39/61 - ctrl/rescan control/118 rescan	60.22
190406 Ctrl DMSO Inhibitor C1 DAPI C2 BF C3 Factin C4 Gata3 C5 Pard6.lif - ctrl/rescan control/118 rescan:0195-0265-0422:c:5/5 z:39/61 - ctrl/rescan control/118 rescan	43.45	1
190406 Ctrl DMSO Inhibitor C1 DAPI C2 BF C3 Factin C4 Gata3 C5 Pard6.lif - ctrl/rescan control/118 rescan:0195-0265-0422:c:5/5 z:39/61 - ctrl/rescan control/118 rescan	43.45
190406 Ctrl DMSO Inhibitor C1 DAPI C2 BF C3 Factin C4 Gata3 C5 Pard6.lif - ctrl/rescan control/118 rescan:0195-0360-0261:c:5/5 z:39/61 - ctrl/rescan control/118 rescan	38.08	1
190406 Ctrl DMSO Inhibitor C1 DAPI C2 BF C3 Factin C4 Gata3 C5 Pard6.lif - ctrl/rescan control/118 rescan:0195-0360-0261:c:5/5 z:39/61 - ctrl/rescan control/118 rescan	38.08
190406 Ctrl DMSO Inhibitor C1 DAPI C2 BF C3 Factin C4 Gata3 C5 Pard6.lif - ctrl/rescan control/118 rescan:0195-0522-0196:c:5/5 z:39/61 - ctrl/rescan control/118 rescan	40.9
190406 Ctrl DMSO Inhibitor C1 DAPI C2 BF C3 Factin C4 Gata3 C5 Pard6.lif - ctrl/rescan control/118 rescan:0155-0696-0260:c:5/5 z:31/61 - ctrl/rescan control/118 rescan	41.52	1
190406 Ctrl DMSO Inhibitor C1 DAPI C2 BF C3 Factin C4 Gata3 C5 Pard6.lif - ctrl/rescan control/118 rescan:0155-0696-0260:c:5/5 z:31/61 - ctrl/rescan control/118 rescan	41.52
190406 Ctrl DMSO Inhibitor C1 DAPI C2 BF C3 Factin C4 Gata3 C5 Pard6.lif - ctrl/rescan control/118 rescan:0155-0781-0375:c:5/5 z:31/61 - ctrl/rescan control/118 rescan	20.21	1
190406 Ctrl DMSO Inhibitor C1 DAPI C2 BF C3 Factin C4 Gata3 C5 Pard6.lif - ctrl/rescan control/118 rescan:0155-0781-0375:c:5/5 z:31/61 - ctrl/rescan control/118 rescan	20.21
Embryo 113
190406 Ctrl DMSO Inhibitor C1 DAPI C2 BF C3 Factin C4 Gata3 C5 Pard6.lif - ctrl/rescan control/113 rescan:0213-0344-0306:c:3/5 z:43/67 - ctrl/rescan control/113 rescan	70.86	1.02667	33	0.929747
190406 Ctrl DMSO Inhibitor C1 DAPI C2 BF C3 Factin C4 Gata3 C5 Pard6.lif - ctrl/rescan control/113 rescan:0215-0342-0301:c:5/5 z:43/67 - ctrl/rescan control/113 rescan	72.75
190406 Ctrl DMSO Inhibitor C1 DAPI C2 BF C3 Factin C4 Gata3 C5 Pard6.lif - ctrl/rescan control/113 rescan:0213-0549-0324:c:3/5 z:43/67 - ctrl/rescan control/113 rescan	52.31	0.622061
190406 Ctrl DMSO Inhibitor C1 DAPI C2 BF C3 Factin C4 Gata3 C5 Pard6.lif - ctrl/rescan control/113 rescan:0215-0544-0278:c:5/5 z:43/67 - ctrl/rescan control/113 rescan	32.54
190406 Ctrl DMSO Inhibitor C1 DAPI C2 BF C3 Factin C4 Gata3 C5 Pard6.lif - ctrl/rescan control/113 rescan:0215-0477-0739:c:5/5 z:43/67 - ctrl/rescan control/113 rescan	86.64	1
190406 Ctrl DMSO Inhibitor C1 DAPI C2 BF C3 Factin C4 Gata3 C5 Pard6.lif - ctrl/rescan control/113 rescan:0215-0477-0739:c:5/5 z:43/67 - ctrl/rescan control/113 rescan	86.64
190406 Ctrl DMSO Inhibitor C1 DAPI C2 BF C3 Factin C4 Gata3 C5 Pard6.lif - ctrl/rescan control/113 rescan:0240-0214-0475:c:5/5 z:48/67 - ctrl/rescan control/113 rescan	41.28	1
190406 Ctrl DMSO Inhibitor C1 DAPI C2 BF C3 Factin C4 Gata3 C5 Pard6.lif - ctrl/rescan control/113 rescan:0240-0214-0475:c:5/5 z:48/67 - ctrl/rescan control/113 rescan	41.28
190406 Ctrl DMSO Inhibitor C1 DAPI C2 BF C3 Factin C4 Gata3 C5 Pard6.lif - ctrl/rescan control/113 rescan:0240-0253-0647:c:5/5 z:48/67 - ctrl/rescan control/113 rescan	45.25	1
190406 Ctrl DMSO Inhibitor C1 DAPI C2 BF C3 Factin C4 Gata3 C5 Pard6.lif - ctrl/rescan control/113 rescan:0240-0253-0647:c:5/5 z:48/67 - ctrl/rescan control/113 rescan	45.25
Embryo 117
190406 Ctrl DMSO Inhibitor C1 DAPI C2 BF C3 Factin C4 Gata3 C5 Pard6.lif - ctrl/117:0138-0447-0328:c:3/5 z:28/66 - ctrl/117	82.51	0.724397	14	0.94393
190406 Ctrl DMSO Inhibitor C1 DAPI C2 BF C3 Factin C4 Gata3 C5 Pard6.lif - ctrl/117:0140-0443-0296:c:5/5 z:28/66 - ctrl/117	59.77
190406 Ctrl DMSO Inhibitor C1 DAPI C2 BF C3 Factin C4 Gata3 C5 Pard6.lif - ctrl/117:0215-0264-0462:c:5/5 z:43/66 - ctrl/117	79.82	1
190406 Ctrl DMSO Inhibitor C1 DAPI C2 BF C3 Factin C4 Gata3 C5 Pard6.lif - ctrl/117:0215-0264-0462:c:5/5 z:43/66 - ctrl/117	79.82
190406 Ctrl DMSO Inhibitor C1 DAPI C2 BF C3 Factin C4 Gata3 C5 Pard6.lif - ctrl/117:0215-0331-0673:c:5/5 z:43/66 - ctrl/117	32.83	1
190406 Ctrl DMSO Inhibitor C1 DAPI C2 BF C3 Factin C4 Gata3 C5 Pard6.lif - ctrl/117:0215-0331-0673:c:5/5 z:43/66 - ctrl/117	32.83
190406 Ctrl DMSO Inhibitor C1 DAPI C2 BF C3 Factin C4 Gata3 C5 Pard6.lif - ctrl/117:0215-0514-0730:c:5/5 z:43/66 - ctrl/117	61.36	1
190406 Ctrl DMSO Inhibitor C1 DAPI C2 BF C3 Factin C4 Gata3 C5 Pard6.lif - ctrl/117:0215-0514-0730:c:5/5 z:43/66 - ctrl/117	61.36
190406 Ctrl DMSO Inhibitor C1 DAPI C2 BF C3 Factin C4 Gata3 C5 Pard6.lif - ctrl/117:0213-0722-0511:c:3/5 z:43/66 - ctrl/117	62.3	1.02568
190406 Ctrl DMSO Inhibitor C1 DAPI C2 BF C3 Factin C4 Gata3 C5 Pard6.lif - ctrl/117:0215-0720-0513:c:5/5 z:43/66 - ctrl/117	63.9
190406 Ctrl DMSO Inhibitor C1 DAPI C2 BF C3 Factin C4 Gata3 C5 Pard6.lif - ctrl/117:0213-0636-0321:c:3/5 z:43/66 - ctrl/117	42.66	0.913502
190406 Ctrl DMSO Inhibitor C1 DAPI C2 BF C3 Factin C4 Gata3 C5 Pard6.lif - ctrl/117:0215-0630-0307:c:5/5 z:43/66 - ctrl/117	38.97
Embryo 116
190406 Ctrl DMSO Inhibitor C1 DAPI C2 BF C3 Factin C4 Gata3 C5 Pard6.lif - ctrl/116:0188-0677-0569:c:3/5 z:38/66 - ctrl/116	67.85	0.717907	10	0.812604
190406 Ctrl DMSO Inhibitor C1 DAPI C2 BF C3 Factin C4 Gata3 C5 Pard6.lif - ctrl/116:0190-0682-0604:c:5/5 z:38/66 - ctrl/116	48.71
190406 Ctrl DMSO Inhibitor C1 DAPI C2 BF C3 Factin C4 Gata3 C5 Pard6.lif - ctrl/116:0188-0447-0645:c:3/5 z:38/66 - ctrl/116	105.23	1
190406 Ctrl DMSO Inhibitor C1 DAPI C2 BF C3 Factin C4 Gata3 C5 Pard6.lif - ctrl/116:0190-0447-0645:c:5/5 z:38/66 - ctrl/116	105.23
190406 Ctrl DMSO Inhibitor C1 DAPI C2 BF C3 Factin C4 Gata3 C5 Pard6.lif - ctrl/116:0163-0352-0451:c:3/5 z:33/66 - ctrl/116	108.82	0.719904
190406 Ctrl DMSO Inhibitor C1 DAPI C2 BF C3 Factin C4 Gata3 C5 Pard6.lif - ctrl/116:0165-0316-0452:c:5/5 z:33/66 - ctrl/116	78.34
Embryo 112
190406 Ctrl DMSO Inhibitor C1 DAPI C2 BF C3 Factin C4 Gata3 C5 Pard6.lif - ctrl/112:0188-0314-0739:c:3/5 z:38/66 - ctrl/112	82.38	1.00777	21	1.00155
190406 Ctrl DMSO Inhibitor C1 DAPI C2 BF C3 Factin C4 Gata3 C5 Pard6.lif - ctrl/112:0190-0313-0740:c:5/5 z:38/66 - ctrl/112	83.02
190406 Ctrl DMSO Inhibitor C1 DAPI C2 BF C3 Factin C4 Gata3 C5 Pard6.lif - ctrl/112:0190-0420-0311:c:5/5 z:38/66 - ctrl/112	42.46	1
190406 Ctrl DMSO Inhibitor C1 DAPI C2 BF C3 Factin C4 Gata3 C5 Pard6.lif - ctrl/112:0190-0420-0311:c:5/5 z:38/66 - ctrl/112	42.46
190406 Ctrl DMSO Inhibitor C1 DAPI C2 BF C3 Factin C4 Gata3 C5 Pard6.lif - ctrl/112:0190-0553-0457:c:5/5 z:38/66 - ctrl/112	44.55	1
190406 Ctrl DMSO Inhibitor C1 DAPI C2 BF C3 Factin C4 Gata3 C5 Pard6.lif - ctrl/112:0190-0553-0457:c:5/5 z:38/66 - ctrl/112	44.55
190406 Ctrl DMSO Inhibitor C1 DAPI C2 BF C3 Factin C4 Gata3 C5 Pard6.lif - ctrl/112:0220-0243-0321:c:5/5 z:45/66 - ctrl/112	67.08	1
190406 Ctrl DMSO Inhibitor C1 DAPI C2 BF C3 Factin C4 Gata3 C5 Pard6.lif - ctrl/112:0220-0243-0321:c:5/5 z:45/66 - ctrl/112	67.08
190406 Ctrl DMSO Inhibitor C1 DAPI C2 BF C3 Factin C4 Gata3 C5 Pard6.lif - ctrl/112:0220-0115-0458:c:5/5 z:45/66 - ctrl/112	16.63	1
190406 Ctrl DMSO Inhibitor C1 DAPI C2 BF C3 Factin C4 Gata3 C5 Pard6.lif - ctrl/112:0220-0115-0458:c:5/5 z:45/66 - ctrl/112	16.63
Embryo 135
190613 Media only DMSO inhibitor 5uM C1Factin C2Gata3 C3Pard6b C4 DAPI C5BF.lif - media only/135:0181-0439-0342:c:1/5 z:37/78 - media only/135	79.64	0.0113009	8	0.0120026
190613 Media only DMSO inhibitor 5uM C1Factin C2Gata3 C3Pard6b C4 DAPI C5BF.lif - media only/135:0183-0345-0254:c:3/5 z:37/78 - media only/135	0.9
190613 Media only DMSO inhibitor 5uM C1Factin C2Gata3 C3Pard6b C4 DAPI C5BF.lif - media only/135:0198-0301-0662:c:3/5 z:40/78 - media only/135	80.16	0.0127246
190613 Media only DMSO inhibitor 5uM C1Factin C2Gata3 C3Pard6b C4 DAPI C5BF.lif - media only/135:0198-0252-0797:c:3/5 z:40/78 - media only/135	1.02
190613 Media only DMSO inhibitor 5uM C1Factin C2Gata3 C3Pard6b C4 DAPI C5BF.lif - media only/135:0141-0549-0856:c:1/5 z:29/78 - media only/135	78.48	0.0137615
190613 Media only DMSO inhibitor 5uM C1Factin C2Gata3 C3Pard6b C4 DAPI C5BF.lif - media only/135:0143-0439-0910:c:3/5 z:29/78 - media only/135	1.08
190613 Media only DMSO inhibitor 5uM C1Factin C2Gata3 C3Pard6b C4 DAPI C5BF.lif - media only/135:0211-0744-0390:c:1/5 z:43/78 - media only/135	78.85	0.010019
190613 Media only DMSO inhibitor 5uM C1Factin C2Gata3 C3Pard6b C4 DAPI C5BF.lif - media only/135:0213-0881-0418:c:3/5 z:43/78 - media only/135	0.79
190613 Media only DMSO inhibitor 5uM C1Factin C2Gata3 C3Pard6b C4 DAPI C5BF.lif - media only/135:0211-0768-0703:c:1/5 z:43/78 - media only/135	71.27	0.0122071
190613 Media only DMSO inhibitor 5uM C1Factin C2Gata3 C3Pard6b C4 DAPI C5BF.lif - media only/135:0213-0843-0770:c:3/5 z:43/78 - media only/135	0.87
Embryo 134
190613 Media only DMSO inhibitor 5uM C1Factin C2Gata3 C3Pard6b C4 DAPI C5BF.lif - media only/134:0208-0410-0774:c:3/5 z:42/78 - media only/134	44.97	0.876584	24	0.890958
190613 Media only DMSO inhibitor 5uM C1Factin C2Gata3 C3Pard6b C4 DAPI C5BF.lif - media only/134:0208-0412-0790:c:3/5 z:42/78 - media only/134	39.42
190613 Media only DMSO inhibitor 5uM C1Factin C2Gata3 C3Pard6b C4 DAPI C5BF.lif - media only/134:0208-0233-0603:c:3/5 z:42/78 - media only/134	48.01	0.994793
190613 Media only DMSO inhibitor 5uM C1Factin C2Gata3 C3Pard6b C4 DAPI C5BF.lif - media only/134:0208-0233-0604:c:3/5 z:42/78 - media only/134	47.76
190613 Media only DMSO inhibitor 5uM C1Factin C2Gata3 C3Pard6b C4 DAPI C5BF.lif - media only/134:0183-0257-0373:c:3/5 z:37/78 - media only/134	52.48	1
190613 Media only DMSO inhibitor 5uM C1Factin C2Gata3 C3Pard6b C4 DAPI C5BF.lif - media only/134:0183-0257-0373:c:3/5 z:37/78 - media only/134	52.48
190613 Media only DMSO inhibitor 5uM C1Factin C2Gata3 C3Pard6b C4 DAPI C5BF.lif - media only/134:0181-0819-0394:c:1/5 z:37/78 - media only/134	56.87	0.692456
190613 Media only DMSO inhibitor 5uM C1Factin C2Gata3 C3Pard6b C4 DAPI C5BF.lif - media only/134:0183-0833-0358:c:3/5 z:37/78 - media only/134	39.38
Embryo 133
190613 Media only DMSO inhibitor 5uM C1Factin C2Gata3 C3Pard6b C4 DAPI C5BF.lif - media only/133:0176-0464-0758:c:1/5 z:36/78 - media only/133	36.95	0.881191	16	0.436856
190613 Media only DMSO inhibitor 5uM C1Factin C2Gata3 C3Pard6b C4 DAPI C5BF.lif - media only/133:0178-0455-0765:c:3/5 z:36/78 - media only/133	32.56
190613 Media only DMSO inhibitor 5uM C1Factin C2Gata3 C3Pard6b C4 DAPI C5BF.lif - media only/133:0176-0666-0816:c:1/5 z:36/78 - media only/133	101.01	0.17424
190613 Media only DMSO inhibitor 5uM C1Factin C2Gata3 C3Pard6b C4 DAPI C5BF.lif - media only/133:0178-0626-0969:c:3/5 z:36/78 - media only/133	17.6
190613 Media only DMSO inhibitor 5uM C1Factin C2Gata3 C3Pard6b C4 DAPI C5BF.lif - media only/133:0191-0685-0375:c:1/5 z:39/78 - media only/133	34.12	0.705451
190613 Media only DMSO inhibitor 5uM C1Factin C2Gata3 C3Pard6b C4 DAPI C5BF.lif - media only/133:0193-0700-0368:c:3/5 z:39/78 - media only/133	24.07
190613 Media only DMSO inhibitor 5uM C1Factin C2Gata3 C3Pard6b C4 DAPI C5BF.lif - media only/133:0243-0449-0376:c:3/5 z:49/78 - media only/133	82.02	0.0405999
190613 Media only DMSO inhibitor 5uM C1Factin C2Gata3 C3Pard6b C4 DAPI C5BF.lif - media only/133:0243-0484-0244:c:3/5 z:49/78 - media only/133	3.33
190613 Media only DMSO inhibitor 5uM C1Factin C2Gata3 C3Pard6b C4 DAPI C5BF.lif - media only/133:0093-0558-0496:c:3/5 z:19/78 - media only/133	77	0.261429
190613 Media only DMSO inhibitor 5uM C1Factin C2Gata3 C3Pard6b C4 DAPI C5BF.lif - media only/133:0093-0630-0421:c:3/5 z:19/78 - media only/133	20.13
190613 Media only DMSO inhibitor 5uM C1Factin C2Gata3 C3Pard6b C4 DAPI C5BF.lif - media only/133:0093-0646-0762:c:3/5 z:19/78 - media only/133	66.98	0.558226
190613 Media only DMSO inhibitor 5uM C1Factin C2Gata3 C3Pard6b C4 DAPI C5BF.lif - media only/133:0093-0665-0802:c:3/5 z:19/78 - media only/133	37.39
Embryo 160
191108 DAPI BF PARD6B PHALLODIN GATA3.lif - 160:0163-0345-0519:c:3/5 z:33/67 - 160	37.88	0.840285	17	0.516044
191108 DAPI BF PARD6B PHALLODIN GATA3.lif - 160:0163-0338-0524:c:3/5 z:33/67 - 160	31.83
191108 DAPI BF PARD6B PHALLODIN GATA3.lif - 160:0163-0395-0649:c:3/5 z:33/67 - 160	24.15	0.680745
191108 DAPI BF PARD6B PHALLODIN GATA3.lif - 160:0163-0375-0639:c:3/5 z:33/67 - 160	16.44
191108 DAPI BF PARD6B PHALLODIN GATA3.lif - 160:0153-0558-0716:c:3/5 z:31/67 - 160	46	0.397826
191108 DAPI BF PARD6B PHALLODIN GATA3.lif - 160:0153-0535-0738:c:3/5 z:31/67 - 160	18.3
191108 DAPI BF PARD6B PHALLODIN GATA3.lif - 160:0138-0796-0518:c:3/5 z:28/67 - 160	67.54	0.217797
191108 DAPI BF PARD6B PHALLODIN GATA3.lif - 160:0138-0818-0608:c:3/5 z:28/67 - 160	14.71
191108 DAPI BF PARD6B PHALLODIN GATA3.lif - 160:0128-0662-0338:c:3/5 z:26/67 - 160	57.75	0.180433
191108 DAPI BF PARD6B PHALLODIN GATA3.lif - 160:0128-0771-0359:c:3/5 z:26/67 - 160	10.42
191108 DAPI BF PARD6B PHALLODIN GATA3.lif - 160:0183-0449-0372:c:3/5 z:38/67 - 160	57.06	0.77918
191108 DAPI BF PARD6B PHALLODIN GATA3.lif - 160:0183-0420-0367:c:3/5 z:38/67 - 160	44.46
Embryo 158
191108 DAPI BF PARD6B PHALLODIN GATA3.lif - 158:0165-0562-0663:c:5/5 z:33/67 - 158	78.64	0.0405646	10	0.0440945
191108 DAPI BF PARD6B PHALLODIN GATA3.lif - 158:0165-0666-0662:c:5/5 z:33/67 - 158	3.19
191108 DAPI BF PARD6B PHALLODIN GATA3.lif - 158:0105-0398-0583:c:5/5 z:21/67 - 158	62.37	0.031265
191108 DAPI BF PARD6B PHALLODIN GATA3.lif - 158:0105-0346-0656:c:5/5 z:21/67 - 158	1.95
191108 DAPI BF PARD6B PHALLODIN GATA3.lif - 158:0139-0583-0283:c:4/5 z:28/67 - 158	54.97	0.0312898
191108 DAPI BF PARD6B PHALLODIN GATA3.lif - 158:0138-0643-0270:c:3/5 z:28/67 - 158	1.72
191108 DAPI BF PARD6B PHALLODIN GATA3.lif - 158:0183-0682-0494:c:3/5 z:37/67 - 158	27.88	0.0814204
191108 DAPI BF PARD6B PHALLODIN GATA3.lif - 158:0183-0692-0444:c:3/5 z:37/67 - 158	2.27
191108 DAPI BF PARD6B PHALLODIN GATA3.lif - 158:0183-0671-0314:c:3/5 z:37/67 - 158	39.24	0.0359327
191108 DAPI BF PARD6B PHALLODIN GATA3.lif - 158:0183-0655-0240:c:3/5 z:37/67 - 158	1.41
Embryo 157
191108 DAPI BF PARD6B PHALLODIN GATA3.lif - 157:0153-0715-0376:c:3/5 z:31/67 - 157	63.53	0.612467	13	0.435212
191108 DAPI BF PARD6B PHALLODIN GATA3.lif - 157:0153-0741-0365:c:3/5 z:31/67 - 157	38.91
191108 DAPI BF PARD6B PHALLODIN GATA3.lif - 157:0173-0533-0237:c:3/5 z:35/67 - 157	52.1	0.61785
191108 DAPI BF PARD6B PHALLODIN GATA3.lif - 157:0173-0551-0217:c:3/5 z:35/67 - 157	32.19
191108 DAPI BF PARD6B PHALLODIN GATA3.lif - 157:0178-0286-0542:c:3/5 z:36/67 - 157	78.54	0.406417
191108 DAPI BF PARD6B PHALLODIN GATA3.lif - 157:0178-0242-0551:c:3/5 z:36/67 - 157	31.92
191108 DAPI BF PARD6B PHALLODIN GATA3.lif - 157:0183-0428-0709:c:3/5 z:37/67 - 157	45.03	0.133689
191108 DAPI BF PARD6B PHALLODIN GATA3.lif - 157:0183-0381-0738:c:3/5 z:37/67 - 157	6.02
191108 DAPI BF PARD6B PHALLODIN GATA3.lif - 157:0124-0396-0397:c:4/5 z:25/67 - 157	44.35	0.405637
191108 DAPI BF PARD6B PHALLODIN GATA3.lif - 157:0124-0385-0338:c:4/5 z:25/67 - 157	17.99
Embryo 179
191225 PLC inhibitor 10uM treatment C1 F-actin C2 GATA3 C3 DAPI C4 BF C5 PARD6B.lif - Control media only/179:0146-0610-0320:c:1/5 z:30/51 - Control media only/179	53.31	0.0468955	7	0.0511205
191225 PLC inhibitor 10uM treatment C1 F-actin C2 GATA3 C3 DAPI C4 BF C5 PARD6B.lif - Control media only/179:0150-0690-0311:c:5/5 z:30/51 - Control media only/179	2.5
191225 PLC inhibitor 10uM treatment C1 F-actin C2 GATA3 C3 DAPI C4 BF C5 PARD6B.lif - Control media only/179:0090-0661-0464:c:5/5 z:18/51 - Control media only/179	88.92	0.0328385
191225 PLC inhibitor 10uM treatment C1 F-actin C2 GATA3 C3 DAPI C4 BF C5 PARD6B.lif - Control media only/179:0090-0747-0383:c:5/5 z:18/51 - Control media only/179	2.92
191225 PLC inhibitor 10uM treatment C1 F-actin C2 GATA3 C3 DAPI C4 BF C5 PARD6B.lif - Control media only/179:0090-0354-0231:c:5/5 z:18/51 - Control media only/179	55.55	0.0736274
191225 PLC inhibitor 10uM treatment C1 F-actin C2 GATA3 C3 DAPI C4 BF C5 PARD6B.lif - Control media only/179:0090-0234-0271:c:5/5 z:18/51 - Control media only/179	4.09
Embryo 177
191225 PLC inhibitor 10uM treatment C1 F-actin C2 GATA3 C3 DAPI C4 BF C5 PARD6B.lif - Control media only/177:0165-0356-0636:c:5/5 z:33/58 - Control media only/177	52.12	0.0140061	12	0.0266851
191225 PLC inhibitor 10uM treatment C1 F-actin C2 GATA3 C3 DAPI C4 BF C5 PARD6B.lif - Control media only/177:0165-0371-0724:c:5/5 z:33/58 - Control media only/177	0.73
191225 PLC inhibitor 10uM treatment C1 F-actin C2 GATA3 C3 DAPI C4 BF C5 PARD6B.lif - Control media only/177:0180-0275-0448:c:5/5 z:36/58 - Control media only/177	43.77	0.014165
191225 PLC inhibitor 10uM treatment C1 F-actin C2 GATA3 C3 DAPI C4 BF C5 PARD6B.lif - Control media only/177:0180-0267-0535:c:5/5 z:36/58 - Control media only/177	0.62
191225 PLC inhibitor 10uM treatment C1 F-actin C2 GATA3 C3 DAPI C4 BF C5 PARD6B.lif - Control media only/177:0145-0380-0265:c:5/5 z:29/58 - Control media only/177	52.38	0.0593738
191225 PLC inhibitor 10uM treatment C1 F-actin C2 GATA3 C3 DAPI C4 BF C5 PARD6B.lif - Control media only/177:0145-0320-0334:c:5/5 z:29/58 - Control media only/177	3.11
191225 PLC inhibitor 10uM treatment C1 F-actin C2 GATA3 C3 DAPI C4 BF C5 PARD6B.lif - Control media only/177:0165-0601-0151:c:5/5 z:33/58 - Control media only/177	64.05	0.0138954
191225 PLC inhibitor 10uM treatment C1 F-actin C2 GATA3 C3 DAPI C4 BF C5 PARD6B.lif - Control media only/177:0165-0522-0114:c:5/5 z:33/58 - Control media only/177	0.89
191225 PLC inhibitor 10uM treatment C1 F-actin C2 GATA3 C3 DAPI C4 BF C5 PARD6B.lif - Control media only/177:0165-0793-0304:c:5/5 z:33/58 - Control media only/177	37.83	0.0319852
191225 PLC inhibitor 10uM treatment C1 F-actin C2 GATA3 C3 DAPI C4 BF C5 PARD6B.lif - Control media only/177:0165-0827-0265:c:5/5 z:33/58 - Control media only/177	1.21
Embryo 176
191225 PLC inhibitor 10uM treatment C1 F-actin C2 GATA3 C3 DAPI C4 BF C5 PARD6B.lif - Control media only/176:0120-0387-0206:c:5/5 z:24/52 - Control media only/176	35.44	0.203725	15	0.21352
191225 PLC inhibitor 10uM treatment C1 F-actin C2 GATA3 C3 DAPI C4 BF C5 PARD6B.lif - Control media only/176:0120-0435-0178:c:5/5 z:24/52 - Control media only/176	7.22
191225 PLC inhibitor 10uM treatment C1 F-actin C2 GATA3 C3 DAPI C4 BF C5 PARD6B.lif - Control media only/176:0175-0545-0302:c:5/5 z:35/52 - Control media only/176	58.8	0.286905
191225 PLC inhibitor 10uM treatment C1 F-actin C2 GATA3 C3 DAPI C4 BF C5 PARD6B.lif - Control media only/176:0175-0575-0246:c:5/5 z:35/52 - Control media only/176	16.87
191225 PLC inhibitor 10uM treatment C1 F-actin C2 GATA3 C3 DAPI C4 BF C5 PARD6B.lif - Control media only/176:0171-0704-0454:c:1/5 z:35/52 - Control media only/176	25.11	0.526483
191225 PLC inhibitor 10uM treatment C1 F-actin C2 GATA3 C3 DAPI C4 BF C5 PARD6B.lif - Control media only/176:0175-0698-0423:c:5/5 z:35/52 - Control media only/176	13.22
191225 PLC inhibitor 10uM treatment C1 F-actin C2 GATA3 C3 DAPI C4 BF C5 PARD6B.lif - Control media only/176:0140-0320-0660:c:5/5 z:28/52 - Control media only/176	50.88	0.0267296
191225 PLC inhibitor 10uM treatment C1 F-actin C2 GATA3 C3 DAPI C4 BF C5 PARD6B.lif - Control media only/176:0140-0218-0599:c:5/5 z:28/52 - Control media only/176	1.36
191225 PLC inhibitor 10uM treatment C1 F-actin C2 GATA3 C3 DAPI C4 BF C5 PARD6B.lif - Control media only/176:0110-0554-0763:c:5/5 z:22/52 - Control media only/176	58.09	0.0237562
191225 PLC inhibitor 10uM treatment C1 F-actin C2 GATA3 C3 DAPI C4 BF C5 PARD6B.lif - Control media only/176:0110-0421-0765:c:5/5 z:22/52 - Control media only/176	1.38
Embryo 175
191225 PLC inhibitor 10uM treatment C1 F-actin C2 GATA3 C3 DAPI C4 BF C5 PARD6B.lif - Control media only/175:0237-0661-0611:c:2/5 z:48/67 - Control media only/175	81.33	0.102545	16	0.0860011
191225 PLC inhibitor 10uM treatment C1 F-actin C2 GATA3 C3 DAPI C4 BF C5 PARD6B.lif - Control media only/175:0240-0737-0694:c:5/5 z:48/67 - Control media only/175	8.34
191225 PLC inhibitor 10uM treatment C1 F-actin C2 GATA3 C3 DAPI C4 BF C5 PARD6B.lif - Control media only/175:0150-0538-0221:c:5/5 z:30/67 - Control media only/175	69.04	0.0660487
191225 PLC inhibitor 10uM treatment C1 F-actin C2 GATA3 C3 DAPI C4 BF C5 PARD6B.lif - Control media only/175:0150-0624-0179:c:5/5 z:30/67 - Control media only/175	4.56
191225 PLC inhibitor 10uM treatment C1 F-actin C2 GATA3 C3 DAPI C4 BF C5 PARD6B.lif - Control media only/175:0170-0402-0750:c:5/5 z:34/67 - Control media only/175	47.33	0.149588
191225 PLC inhibitor 10uM treatment C1 F-actin C2 GATA3 C3 DAPI C4 BF C5 PARD6B.lif - Control media only/175:0170-0369-0800:c:5/5 z:34/67 - Control media only/175	7.08
191225 PLC inhibitor 10uM treatment C1 F-actin C2 GATA3 C3 DAPI C4 BF C5 PARD6B.lif - Control media only/175:0170-0621-0742:c:5/5 z:34/67 - Control media only/175	56.54	0.0258224
191225 PLC inhibitor 10uM treatment C1 F-actin C2 GATA3 C3 DAPI C4 BF C5 PARD6B.lif - Control media only/175:0170-0636-0808:c:5/5 z:34/67 - Control media only/175	1.46
Embryo 210
220120 C1-PARD6B C2-GATA3 C3-DAPI BF C4-FACTIN 7.5uM U73122 treatment DMSO media ctrl.lif - ctrl media/210:0205-0740-0492:c:5/5 z:41/76 - ctrl media/210	39.84	1	12	0.831798
220120 C1-PARD6B C2-GATA3 C3-DAPI BF C4-FACTIN 7.5uM U73122 treatment DMSO media ctrl.lif - ctrl media/210:0201-0740-0492:c:1/5 z:41/76 - ctrl media/210	39.84
220120 C1-PARD6B C2-GATA3 C3-DAPI BF C4-FACTIN 7.5uM U73122 treatment DMSO media ctrl.lif - ctrl media/210:0201-0692-0369:c:1/5 z:41/76 - ctrl media/210	38.08	1
220120 C1-PARD6B C2-GATA3 C3-DAPI BF C4-FACTIN 7.5uM U73122 treatment DMSO media ctrl.lif - ctrl media/210:0201-0692-0369:c:1/5 z:41/76 - ctrl media/210	38.08
220120 C1-PARD6B C2-GATA3 C3-DAPI BF C4-FACTIN 7.5uM U73122 treatment DMSO media ctrl.lif - ctrl media/210:0201-0557-0341:c:1/5 z:41/76 - ctrl media/210	58.55	1
220120 C1-PARD6B C2-GATA3 C3-DAPI BF C4-FACTIN 7.5uM U73122 treatment DMSO media ctrl.lif - ctrl media/210:0201-0557-0341:c:1/5 z:41/76 - ctrl media/210	58.55
220120 C1-PARD6B C2-GATA3 C3-DAPI BF C4-FACTIN 7.5uM U73122 treatment DMSO media ctrl.lif - ctrl media/210:0201-0383-0514:c:1/5 z:41/76 - ctrl media/210	70.86	0.821479
220120 C1-PARD6B C2-GATA3 C3-DAPI BF C4-FACTIN 7.5uM U73122 treatment DMSO media ctrl.lif - ctrl media/210:0201-0369-0516:c:1/5 z:41/76 - ctrl media/210	58.21
220120 C1-PARD6B C2-GATA3 C3-DAPI BF C4-FACTIN 7.5uM U73122 treatment DMSO media ctrl.lif - ctrl media/210:0261-0480-0454:c:1/5 z:53/76 - ctrl media/210	41.14	0.679387
220120 C1-PARD6B C2-GATA3 C3-DAPI BF C4-FACTIN 7.5uM U73122 treatment DMSO media ctrl.lif - ctrl media/210:0261-0479-0429:c:1/5 z:53/76 - ctrl media/210	27.95
220120 C1-PARD6B C2-GATA3 C3-DAPI BF C4-FACTIN 7.5uM U73122 treatment DMSO media ctrl.lif - ctrl media/210:0261-0517-0568:c:1/5 z:53/76 - ctrl media/210	59.05	0.489924
220120 C1-PARD6B C2-GATA3 C3-DAPI BF C4-FACTIN 7.5uM U73122 treatment DMSO media ctrl.lif - ctrl media/210:0261-0487-0600:c:1/5 z:53/76 - ctrl media/210	28.93
Embryo 209
220120 C1-PARD6B C2-GATA3 C3-DAPI BF C4-FACTIN 7.5uM U73122 treatment DMSO media ctrl.lif - ctrl media/209:0230-0460-0607:c:5/5 z:49/81 - ctrl media/209	31.73	0.648913	4	0.207266
220120 C1-PARD6B C2-GATA3 C3-DAPI BF C4-FACTIN 7.5uM U73122 treatment DMSO media ctrl.lif - ctrl media/209:0241-0469-0647:c:1/5 z:49/81 - ctrl media/209	20.59
220120 C1-PARD6B C2-GATA3 C3-DAPI BF C4-FACTIN 7.5uM U73122 treatment DMSO media ctrl.lif - ctrl media/209:0241-0642-0699:c:1/5 z:49/81 - ctrl media/209	87.54	0.0263879
220120 C1-PARD6B C2-GATA3 C3-DAPI BF C4-FACTIN 7.5uM U73122 treatment DMSO media ctrl.lif - ctrl media/209:0241-0664-0781:c:1/5 z:49/81 - ctrl media/209	2.31
220120 C1-PARD6B C2-GATA3 C3-DAPI BF C4-FACTIN 7.5uM U73122 treatment DMSO media ctrl.lif - ctrl media/209:0241-0744-0509:c:1/5 z:49/81 - ctrl media/209	63.79	0.0501646
220120 C1-PARD6B C2-GATA3 C3-DAPI BF C4-FACTIN 7.5uM U73122 treatment DMSO media ctrl.lif - ctrl media/209:0241-0749-0419:c:1/5 z:49/81 - ctrl media/209	3.2
220120 C1-PARD6B C2-GATA3 C3-DAPI BF C4-FACTIN 7.5uM U73122 treatment DMSO media ctrl.lif - ctrl media/209:0161-0679-0392:c:1/5 z:33/81 - ctrl media/209	63.61	0.1036
220120 C1-PARD6B C2-GATA3 C3-DAPI BF C4-FACTIN 7.5uM U73122 treatment DMSO media ctrl.lif - ctrl media/209:0161-0718-0348:c:1/5 z:33/81 - ctrl media/209	6.59
Embryo 208
220120 C1-PARD6B C2-GATA3 C3-DAPI BF C4-FACTIN 7.5uM U73122 treatment DMSO media ctrl.lif - ctrl media/208:0200-0195-0534:c:5/5 z:40/81 - ctrl media/208	60.29	0.320119	18	0.212875
220120 C1-PARD6B C2-GATA3 C3-DAPI BF C4-FACTIN 7.5uM U73122 treatment DMSO media ctrl.lif - ctrl media/208:0200-0195-0534:c:5/5 z:40/81 - ctrl media/208	19.3
220120 C1-PARD6B C2-GATA3 C3-DAPI BF C4-FACTIN 7.5uM U73122 treatment DMSO media ctrl.lif - ctrl media/208:0196-0156-0522:c:1/5 z:40/81 - ctrl media/208	51.1	0.143836
220120 C1-PARD6B C2-GATA3 C3-DAPI BF C4-FACTIN 7.5uM U73122 treatment DMSO media ctrl.lif - ctrl media/208:0146-0234-0635:c:1/5 z:30/81 - ctrl media/208	7.35
220120 C1-PARD6B C2-GATA3 C3-DAPI BF C4-FACTIN 7.5uM U73122 treatment DMSO media ctrl.lif - ctrl media/208:0146-0209-0667:c:1/5 z:30/81 - ctrl media/208	50.16	0.311603
220120 C1-PARD6B C2-GATA3 C3-DAPI BF C4-FACTIN 7.5uM U73122 treatment DMSO media ctrl.lif - ctrl media/208:0181-0601-0675:c:1/5 z:37/81 - ctrl media/208	15.63
220120 C1-PARD6B C2-GATA3 C3-DAPI BF C4-FACTIN 7.5uM U73122 treatment DMSO media ctrl.lif - ctrl media/208:0181-0628-0703:c:1/5 z:37/81 - ctrl media/208	42.23	0.242008
220120 C1-PARD6B C2-GATA3 C3-DAPI BF C4-FACTIN 7.5uM U73122 treatment DMSO media ctrl.lif - ctrl media/208:0176-0579-0532:c:1/5 z:36/81 - ctrl media/208	10.22
220120 C1-PARD6B C2-GATA3 C3-DAPI BF C4-FACTIN 7.5uM U73122 treatment DMSO media ctrl.lif - ctrl media/208:0176-0618-0529:c:1/5 z:36/81 - ctrl media/208	54.17	0.142699
220120 C1-PARD6B C2-GATA3 C3-DAPI BF C4-FACTIN 7.5uM U73122 treatment DMSO media ctrl.lif - ctrl media/208:0256-0359-0814:c:1/5 z:54/81 - ctrl media/208	7.73
220120 C1-PARD6B C2-GATA3 C3-DAPI BF C4-FACTIN 7.5uM U73122 treatment DMSO media ctrl.lif - ctrl media/208:0256-0314-0839:c:1/5 z:54/81 - ctrl media/208	50.69	0.116986
220120 C1-PARD6B C2-GATA3 C3-DAPI BF C4-FACTIN 7.5uM U73122 treatment DMSO media ctrl.lif - ctrl media/208:0136-0239-0633:c:1/5 z:26/81 - ctrl media/208	5.93
Embryo 207
220120 C1-PARD6B C2-GATA3 C3-DAPI BF C4-FACTIN 7.5uM U73122 treatment DMSO media ctrl.lif - ctrl media/207:0195-0711-0536:c:5/5 z:39/81 - ctrl media/207	24.11	0.795106	16	0.438251
220120 C1-PARD6B C2-GATA3 C3-DAPI BF C4-FACTIN 7.5uM U73122 treatment DMSO media ctrl.lif - ctrl media/207:0191-0714-0544:c:1/5 z:39/81 - ctrl media/207	19.17
220120 C1-PARD6B C2-GATA3 C3-DAPI BF C4-FACTIN 7.5uM U73122 treatment DMSO media ctrl.lif - ctrl media/207:0191-0701-0416:c:1/5 z:39/81 - ctrl media/207	57.87	0.42751
220120 C1-PARD6B C2-GATA3 C3-DAPI BF C4-FACTIN 7.5uM U73122 treatment DMSO media ctrl.lif - ctrl media/207:0191-0749-0435:c:1/5 z:39/81 - ctrl media/207	24.74
220120 C1-PARD6B C2-GATA3 C3-DAPI BF C4-FACTIN 7.5uM U73122 treatment DMSO media ctrl.lif - ctrl media/207:0191-0363-0521:c:1/5 z:39/81 - ctrl media/207	43.19	0.0893725
220120 C1-PARD6B C2-GATA3 C3-DAPI BF C4-FACTIN 7.5uM U73122 treatment DMSO media ctrl.lif - ctrl media/207:0191-0333-0464:c:1/5 z:39/81 - ctrl media/207	3.86
220120 C1-PARD6B C2-GATA3 C3-DAPI BF C4-FACTIN 7.5uM U73122 treatment DMSO media ctrl.lif - ctrl media/207:0191-0437-0617:c:1/5 z:39/81 - ctrl media/207	23.83	0.501049
220120 C1-PARD6B C2-GATA3 C3-DAPI BF C4-FACTIN 7.5uM U73122 treatment DMSO media ctrl.lif - ctrl media/207:0191-0418-0610:c:1/5 z:39/81 - ctrl media/207	11.94
220120 C1-PARD6B C2-GATA3 C3-DAPI BF C4-FACTIN 7.5uM U73122 treatment DMSO media ctrl.lif - ctrl media/207:0161-0451-0287:c:1/5 z:32/81 - ctrl media/207	29.62	0.0172181
220120 C1-PARD6B C2-GATA3 C3-DAPI BF C4-FACTIN 7.5uM U73122 treatment DMSO media ctrl.lif - ctrl media/207:0161-0459-0263:c:1/5 z:32/81 - ctrl media/207	0.51
220120 C1-PARD6B C2-GATA3 C3-DAPI BF C4-FACTIN 7.5uM U73122 treatment DMSO media ctrl.lif - ctrl media/207:0161-0589-0300:c:1/5 z:32/81 - ctrl media/207	52.98	0.376746
220120 C1-PARD6B C2-GATA3 C3-DAPI BF C4-FACTIN 7.5uM U73122 treatment DMSO media ctrl.lif - ctrl media/207:0161-0552-0257:c:1/5 z:32/81 - ctrl media/207	19.96
220120 C1-PARD6B C2-GATA3 C3-DAPI BF C4-FACTIN 7.5uM U73122 treatment DMSO media ctrl.lif - ctrl media/207:0226-0364-0503:c:1/5 z:46/81 - ctrl media/207	54.31	1.02136
220120 C1-PARD6B C2-GATA3 C3-DAPI BF C4-FACTIN 7.5uM U73122 treatment DMSO media ctrl.lif - ctrl media/207:0226-0363-0506:c:1/5 z:46/81 - ctrl media/207	55.47
220120 C1-PARD6B C2-GATA3 C3-DAPI BF C4-FACTIN 7.5uM U73122 treatment DMSO media ctrl.lif - ctrl media/207:0226-0458-0634:c:1/5 z:46/81 - ctrl media/207	26.22	0.277651
220120 C1-PARD6B C2-GATA3 C3-DAPI BF C4-FACTIN 7.5uM U73122 treatment DMSO media ctrl.lif - ctrl media/207:0226-0420-0616:c:1/5 z:46/81 - ctrl media/207	7.28
Embryo 206
220120 C1-PARD6B C2-GATA3 C3-DAPI BF C4-FACTIN 7.5uM U73122 treatment DMSO media ctrl.lif - ctrl media/206:0161-0391-0366:c:1/5 z:33/81 - ctrl media/206	50.34	0.812872	28	0.976266
220120 C1-PARD6B C2-GATA3 C3-DAPI BF C4-FACTIN 7.5uM U73122 treatment DMSO media ctrl.lif - ctrl media/206:0161-0391-0340:c:1/5 z:33/81 - ctrl media/206	40.92
220120 C1-PARD6B C2-GATA3 C3-DAPI BF C4-FACTIN 7.5uM U73122 treatment DMSO media ctrl.lif - ctrl media/206:0165-0531-0300:c:5/5 z:33/81 - ctrl media/206	49.07	1.02099
220120 C1-PARD6B C2-GATA3 C3-DAPI BF C4-FACTIN 7.5uM U73122 treatment DMSO media ctrl.lif - ctrl media/206:0161-0531-0301:c:1/5 z:33/81 - ctrl media/206	50.1
220120 C1-PARD6B C2-GATA3 C3-DAPI BF C4-FACTIN 7.5uM U73122 treatment DMSO media ctrl.lif - ctrl media/206:0161-0661-0383:c:1/5 z:33/81 - ctrl media/206	40.56	1
220120 C1-PARD6B C2-GATA3 C3-DAPI BF C4-FACTIN 7.5uM U73122 treatment DMSO media ctrl.lif - ctrl media/206:0161-0661-0383:c:1/5 z:33/81 - ctrl media/206	40.56
220120 C1-PARD6B C2-GATA3 C3-DAPI BF C4-FACTIN 7.5uM U73122 treatment DMSO media ctrl.lif - ctrl media/206:0161-0737-0505:c:1/5 z:33/81 - ctrl media/206	38.8	1
220120 C1-PARD6B C2-GATA3 C3-DAPI BF C4-FACTIN 7.5uM U73122 treatment DMSO media ctrl.lif - ctrl media/206:0161-0737-0505:c:1/5 z:33/81 - ctrl media/206	38.8
220120 C1-PARD6B C2-GATA3 C3-DAPI BF C4-FACTIN 7.5uM U73122 treatment DMSO media ctrl.lif - ctrl media/206:0121-0705-0517:c:1/5 z:23/81 - ctrl media/206	25.14	1
220120 C1-PARD6B C2-GATA3 C3-DAPI BF C4-FACTIN 7.5uM U73122 treatment DMSO media ctrl.lif - ctrl media/206:0121-0705-0517:c:1/5 z:23/81 - ctrl media/206	25.14
220120 C1-PARD6B C2-GATA3 C3-DAPI BF C4-FACTIN 7.5uM U73122 treatment DMSO media ctrl.lif - ctrl media/206:0121-0674-0623:c:1/5 z:23/81 - ctrl media/206	39.87	1
220120 C1-PARD6B C2-GATA3 C3-DAPI BF C4-FACTIN 7.5uM U73122 treatment DMSO media ctrl.lif - ctrl media/206:0121-0674-0623:c:1/5 z:23/81 - ctrl media/206	39.87
220120 C1-PARD6B C2-GATA3 C3-DAPI BF C4-FACTIN 7.5uM U73122 treatment DMSO media ctrl.lif - ctrl media/206:0121-0572-0706:c:1/5 z:23/81 - ctrl media/206	36.96	1
220120 C1-PARD6B C2-GATA3 C3-DAPI BF C4-FACTIN 7.5uM U73122 treatment DMSO media ctrl.lif - ctrl media/206:0121-0572-0706:c:1/5 z:23/81 - ctrl media/206	36.96
Embryo 205
220120 C1-PARD6B C2-GATA3 C3-DAPI BF C4-FACTIN 7.5uM U73122 treatment DMSO media ctrl.lif - ctrl media/205:0210-0743-0592:c:5/5 z:42/113 - ctrl media/205	67.2	0.196131	8	0.132055
220120 C1-PARD6B C2-GATA3 C3-DAPI BF C4-FACTIN 7.5uM U73122 treatment DMSO media ctrl.lif - ctrl media/205:0207-0780-0623:c:2/5 z:42/113 - ctrl media/205	13.18
220120 C1-PARD6B C2-GATA3 C3-DAPI BF C4-FACTIN 7.5uM U73122 treatment DMSO media ctrl.lif - ctrl media/205:0255-0656-0466:c:5/5 z:51/113 - ctrl media/205	106.29	0.0191928
220120 C1-PARD6B C2-GATA3 C3-DAPI BF C4-FACTIN 7.5uM U73122 treatment DMSO media ctrl.lif - ctrl media/205:0251-0681-0378:c:1/5 z:51/113 - ctrl media/205	2.04
220120 C1-PARD6B C2-GATA3 C3-DAPI BF C4-FACTIN 7.5uM U73122 treatment DMSO media ctrl.lif - ctrl media/205:0251-0548-0704:c:1/5 z:51/113 - ctrl media/205	52.25	0.0223923
220120 C1-PARD6B C2-GATA3 C3-DAPI BF C4-FACTIN 7.5uM U73122 treatment DMSO media ctrl.lif - ctrl media/205:0251-0484-0676:c:1/5 z:51/113 - ctrl media/205	1.17
220120 C1-PARD6B C2-GATA3 C3-DAPI BF C4-FACTIN 7.5uM U73122 treatment DMSO media ctrl.lif - ctrl media/205:0251-0457-0434:c:1/5 z:51/113 - ctrl media/205	68.41	0.404619
220120 C1-PARD6B C2-GATA3 C3-DAPI BF C4-FACTIN 7.5uM U73122 treatment DMSO media ctrl.lif - ctrl media/205:0251-0462-0388:c:1/5 z:51/113 - ctrl media/205	27.68
220120 C1-PARD6B C2-GATA3 C3-DAPI BF C4-FACTIN 7.5uM U73122 treatment DMSO media ctrl.lif - ctrl media/205:0251-0375-0597:c:1/5 z:51/113 - ctrl media/205	97	0.0179381
220120 C1-PARD6B C2-GATA3 C3-DAPI BF C4-FACTIN 7.5uM U73122 treatment DMSO media ctrl.lif - ctrl media/205:0251-0334-0513:c:1/5 z:51/113 - ctrl media/205	1.74
Embryo 204
220120 C1-PARD6B C2-GATA3 C3-DAPI BF C4-FACTIN 7.5uM U73122 treatment DMSO media ctrl.lif - ctrl media/204:0335-0434-0240:c:5/5 z:67/113 - ctrl media/204	44.72	1	51	1
220120 C1-PARD6B C2-GATA3 C3-DAPI BF C4-FACTIN 7.5uM U73122 treatment DMSO media ctrl.lif - ctrl media/204:0335-0434-0240:c:5/5 z:67/113 - ctrl media/204	44.72
220120 C1-PARD6B C2-GATA3 C3-DAPI BF C4-FACTIN 7.5uM U73122 treatment DMSO media ctrl.lif - ctrl media/204:0335-0322-0287:c:5/5 z:67/113 - ctrl media/204	17.95	1
220120 C1-PARD6B C2-GATA3 C3-DAPI BF C4-FACTIN 7.5uM U73122 treatment DMSO media ctrl.lif - ctrl media/204:0335-0322-0287:c:5/5 z:67/113 - ctrl media/204	17.95
220120 C1-PARD6B C2-GATA3 C3-DAPI BF C4-FACTIN 7.5uM U73122 treatment DMSO media ctrl.lif - ctrl media/204:0335-0577-0246:c:5/5 z:67/113 - ctrl media/204	28.75	1
220120 C1-PARD6B C2-GATA3 C3-DAPI BF C4-FACTIN 7.5uM U73122 treatment DMSO media ctrl.lif - ctrl media/204:0335-0577-0246:c:5/5 z:67/113 - ctrl media/204	28.75
220120 C1-PARD6B C2-GATA3 C3-DAPI BF C4-FACTIN 7.5uM U73122 treatment DMSO media ctrl.lif - ctrl media/204:0335-0667-0326:c:5/5 z:67/113 - ctrl media/204	33.79	1
220120 C1-PARD6B C2-GATA3 C3-DAPI BF C4-FACTIN 7.5uM U73122 treatment DMSO media ctrl.lif - ctrl media/204:0335-0667-0326:c:5/5 z:67/113 - ctrl media/204	33.79
220120 C1-PARD6B C2-GATA3 C3-DAPI BF C4-FACTIN 7.5uM U73122 treatment DMSO media ctrl.lif - ctrl media/204:0335-0437-0744:c:5/5 z:67/113 - ctrl media/204	18.11	1
220120 C1-PARD6B C2-GATA3 C3-DAPI BF C4-FACTIN 7.5uM U73122 treatment DMSO media ctrl.lif - ctrl media/204:0335-0437-0744:c:5/5 z:67/113 - ctrl media/204	18.11
220120 C1-PARD6B C2-GATA3 C3-DAPI BF C4-FACTIN 7.5uM U73122 treatment DMSO media ctrl.lif - ctrl media/204:0335-0509-0741:c:5/5 z:67/113 - ctrl media/204	16.76	1
220120 C1-PARD6B C2-GATA3 C3-DAPI BF C4-FACTIN 7.5uM U73122 treatment DMSO media ctrl.lif - ctrl media/204:0335-0509-0741:c:5/5 z:67/113 - ctrl media/204	16.76
Embryo 203
220120 C1-PARD6B C2-GATA3 C3-DAPI BF C4-FACTIN 7.5uM U73122 treatment DMSO media ctrl.lif - ctrl media/203:0156-0709-0560:c:1/5 z:32/90 - ctrl media/203	56.93	0.027929	12	0.0173603
220120 C1-PARD6B C2-GATA3 C3-DAPI BF C4-FACTIN 7.5uM U73122 treatment DMSO media ctrl.lif - ctrl media/203:0156-0757-0558:c:1/5 z:32/90 - ctrl media/203	1.59
220120 C1-PARD6B C2-GATA3 C3-DAPI BF C4-FACTIN 7.5uM U73122 treatment DMSO media ctrl.lif - ctrl media/203:0196-0608-0668:c:1/5 z:40/90 - ctrl media/203	54.75	0.0213699
220120 C1-PARD6B C2-GATA3 C3-DAPI BF C4-FACTIN 7.5uM U73122 treatment DMSO media ctrl.lif - ctrl media/203:0196-0538-0702:c:1/5 z:40/90 - ctrl media/203	1.17
220120 C1-PARD6B C2-GATA3 C3-DAPI BF C4-FACTIN 7.5uM U73122 treatment DMSO media ctrl.lif - ctrl media/203:0071-0379-0492:c:1/5 z:15/90 - ctrl media/203	73.85	0.0147596
220120 C1-PARD6B C2-GATA3 C3-DAPI BF C4-FACTIN 7.5uM U73122 treatment DMSO media ctrl.lif - ctrl media/203:0071-0327-0460:c:1/5 z:15/90 - ctrl media/203	1.09
220120 C1-PARD6B C2-GATA3 C3-DAPI BF C4-FACTIN 7.5uM U73122 treatment DMSO media ctrl.lif - ctrl media/203:0071-0521-0309:c:1/5 z:15/90 - ctrl media/203	96.29	0.0154741
220120 C1-PARD6B C2-GATA3 C3-DAPI BF C4-FACTIN 7.5uM U73122 treatment DMSO media ctrl.lif - ctrl media/203:0071-0561-0245:c:1/5 z:15/90 - ctrl media/203	1.49
220120 C1-PARD6B C2-GATA3 C3-DAPI BF C4-FACTIN 7.5uM U73122 treatment DMSO media ctrl.lif - ctrl media/203:0071-0669-0487:c:1/5 z:15/90 - ctrl media/203	70.16	0.0072691
220120 C1-PARD6B C2-GATA3 C3-DAPI BF C4-FACTIN 7.5uM U73122 treatment DMSO media ctrl.lif - ctrl media/203:0071-0724-0444:c:1/5 z:15/90 - ctrl media/203	0.51
Embryo 201
220120 C1-PARD6B C2-GATA3 C3-DAPI BF C4-FACTIN 7.5uM U73122 treatment DMSO media ctrl.lif - ctrl media/201:0170-0332-0552:c:5/5 z:34/90 - ctrl media/201	73.38	0.0143091	10	0.0138081
220120 C1-PARD6B C2-GATA3 C3-DAPI BF C4-FACTIN 7.5uM U73122 treatment DMSO media ctrl.lif - ctrl media/201:0166-0295-0619:c:1/5 z:34/90 - ctrl media/201	1.05
220120 C1-PARD6B C2-GATA3 C3-DAPI BF C4-FACTIN 7.5uM U73122 treatment DMSO media ctrl.lif - ctrl media/201:0166-0486-0667:c:1/5 z:34/90 - ctrl media/201	60.34	0.0207159
220120 C1-PARD6B C2-GATA3 C3-DAPI BF C4-FACTIN 7.5uM U73122 treatment DMSO media ctrl.lif - ctrl media/201:0166-0474-0718:c:1/5 z:34/90 - ctrl media/201	1.25
220120 C1-PARD6B C2-GATA3 C3-DAPI BF C4-FACTIN 7.5uM U73122 treatment DMSO media ctrl.lif - ctrl media/201:0221-0587-0359:c:1/5 z:45/90 - ctrl media/201	81.53	0.00417024
220120 C1-PARD6B C2-GATA3 C3-DAPI BF C4-FACTIN 7.5uM U73122 treatment DMSO media ctrl.lif - ctrl media/201:0221-0611-0280:c:1/5 z:45/90 - ctrl media/201	0.34
220120 C1-PARD6B C2-GATA3 C3-DAPI BF C4-FACTIN 7.5uM U73122 treatment DMSO media ctrl.lif - ctrl media/201:0221-0651-0542:c:1/5 z:45/90 - ctrl media/201	62.36	0.0186017
220120 C1-PARD6B C2-GATA3 C3-DAPI BF C4-FACTIN 7.5uM U73122 treatment DMSO media ctrl.lif - ctrl media/201:0221-0693-0482:c:1/5 z:45/90 - ctrl media/201	1.16
220120 C1-PARD6B C2-GATA3 C3-DAPI BF C4-FACTIN 7.5uM U73122 treatment DMSO media ctrl.lif - ctrl media/201:0221-0385-0345:c:1/5 z:45/90 - ctrl media/201	86.27	0.0112438
220120 C1-PARD6B C2-GATA3 C3-DAPI BF C4-FACTIN 7.5uM U73122 treatment DMSO media ctrl.lif - ctrl media/201:0221-0467-0282:c:1/5 z:45/90 - ctrl media/201	0.97

## Sheet: Figure 1 Supplement 1a, 1b, 1b
MORPHOKINETIC ANALYSIS - TIME 0
# Emb	#Total_cells_t0	#Intact_cells_t0	#Degenerated_cells_t0
1	9	7	2
2	8	6	2
3	8	8	0
4	8	8	0
5	8	8	0
6	7	7	0
7	7	7	0
8	8	8	0
9	6	6	0
10	8	8	0
11	9	9	0
12	11	11	0
13	8	8	0
14	8	8	0
15	8	8	0
16	8	6	2
17	8	8	0
18	6	6	0
19	7	7	0
20	6	6	0
21	6	6	0
22	8	8	0
23	10	10	0
24	8	8	0
25	7	7	0
26	10	10	0
27	8	8	0
28	8	8	0
29	10	10	0
30	9	9	0
31	9	9	0
32	7	7	0
33	8	8	0
34	8	8	0
35	8	8	0
36	8	8	0
37	9	9	0
38	8	6	2
39	7	5	2
40	7	7	0
41	9	6	3
42	11	11	0
43	7	2	5
44	7	7	0
45	12	12	0
46	9	9	0
48	9	9	0
49	7	5	2
50	10	10	0
51	8	8	0
52	8	8	0
53	8	8	0
54	8	8	0
55	8	8	0
56	8	8	0
57	8	8	0
59	7	6	1
60	8	8	0
62	8	8	0
64	8	6	2
77	8	8	0
78	7	7	0
79	8	8	0
80	7	7	0
81	7	7	0
82	7	7	0
83	7	7	0
84	7	7	0
85	7	7	0
86	7	7	0
87	8	8	0
88	7	7	0
107	9	9	0
108	7	7	0
109	12	12	0
110	7	7	0
111	7	7	0
112	7	7	0
113	10	10	0
114	8	2	6
115	9	9	0
116	8	8	0
117	8	8	0
118	7	7	0
131	9	3	6
132	7	7	0
133	8	8	0
134	8	8	0
135	9	9	0
136	7	5	2
149	7	7	0
150	7	7	0
151	7	7	0
152	8	8	0
153	7	7	0
154	9	9	0
171	9	9	0
172	8	8	0
173	7	7	0
174	8	8	0
175	8	8	0
176	8	8	0
177	8	8	0
178	7	7	0
179	8	5	3
180	4	4	0
201	6	6	0
203	6	6	0
204	13	13	0
205	9	9	0
206	9	9	0
207	8	8	0
208	8	8	0
209	8	8	0
210	9	9	0
233	8	8	0
234	7	7	0
235	8	8	0
236	7	7	0
237	9	9	0
239	8	8	0
240	6	6	0
251	8	8	0
252	9	9	0
253	8	8	0
254	8	8	0
255	9	9	0
256	8	8	0
257	8	8	0
258	9	9	0
259	7	7	0
260	8	8	0

## Sheet: Figure1 Supplement 1c, 1d, 1g
MORPHOKINETIC ANALYSIS - TIME 24 HOURS
# Emb	#total_cells_t24	#Intact_cells_t24	#Degenerated_cells_culture
2	11	11	0
3	13	13	0
4	11	11	0
6	9	9	0
7	11	11	0
8	14	14	0
11	15	15	0
13	11	11	0
16	13	13	0
17	12	12	0
18	9	9	0
19	12	12	0
20	11	11	0
77	13	13	0
78	13	13	0
79	11	11	0
80	11	11	0
81	8	8	0
82	11	11	0
83	11	11	0
84	11	11	0
85	13	13	0
86	9	9	0
87	11	11	0
88	8	8	0
107	9	8	1
108	12	12	0
109	12	12	0
110	9	9	0
111	11	11	0
112	12	12	0
113	14	14	0
114	9	9	0
115	15	15	0
116	13	13	0
117	12	12	0
118	9	9	0
131	9	8	1
132	13	13	0
133	14	14	0
134	8	8	0
135	16	16	0
136	7	7	0
149	13	13	0
150	7	7	0
151	14	14	0
152	15	15	0
153	11	11	0
154	18	16	2
171	13	13	0
172	16	16	0
173	8	8	0
174	10	10	0
175	15	15	0
176	15	15	0
177	13	13	0
178	15	15	0
179	9	9	0
180			0
201	9	9	0
203	11	11	0
204	25	25	0
205	11	11	0
206	21	21	0
207	17	17	0
208	17	17	0
209	15	15	0
210	15	15	0
233	14	14	0
234	7	7	0
235	10	10	0
236	10	10	0
237	16	16	0
239	14	14	0
240	10	10	0
251	12	12	0
252	14	14	0
253	12	12	0
254	14	14	0
255	13	13	0
256	13	13	0
257	15	12	3
258	13	13	0
259	8	8	0
260	13	13	0

## Sheet: Figure 1 Supplement 1e
CELL CYCLE LENGTH
# Emb	t4-8	# Emb	t8-16
18	22.8	2	15.9
18	21.5	3	21
	22.15	7	16.2
		16	12.6
		111	16.1
		112	16.85
		178	15.9
		208	5.1
		16	11.7
		208	13.5
			14.485

## Sheet: Figure1 Supplement 1h
NUMBER OF CELLS AT THE START AND END OF COMPACTION
# Emb	#cells at tSC	#cells at tM
1	11	11
2	11
3	10	10
4	10	10
5	8
6	7
7	8	10
8	12	14
9	7	7
11	11
12	12
13	10	11
14	13	13
17	12	12
18	7
19	11	12
26	10
27	8
31	9
34	12
38	8
39	7
40	11	11
41	9
42	12	12
44	8	8
45	14
48	9
53	8
54	8
55	8
56	8
59	7
77	11
79	9	9
80	8	8
81	8	8
82	9	11
83	8	8
84	8
85	15	13
86	7	7
87	10	11
88	7
107		9
108	7	12
109	12
110	7
111	9	10
112	7	11
113	10	11
115		13
116	9
117	12	12
118		7
132	12
133	8
134	8	8
135	12	16
149	8	13
150	7
151	14	14
154	14	18
171	13
172	10	16
175	15
176	13	15
177	13
178	10	14
179	9	9
203	8	11
204	13	19
206	15	20
207	14	14
208	14	14
209	14	15
234		7
235	8	9
237	15	15
239	14
252	9	9
253	8	8
254	14	14
255	12	13
257	8	11
258	9	9
260	12	13

## Sheet: Figure1 Supplement 1j
POLARIZED CELL NUMBER AS A FUNCTION OF TOTAL CELL NUMBER PER EMBRYO
2 HOURS				9 HOURS				24 HOURS
Embryo #	Culturing time	N Pard6 polarised cells	Total number of cells	Embryo #	Culturing time	N Pard6 polarised cells	Total number of cells	Embryo #	Culturing time	N Pard6 polarised cells	Total number of cells
22	2h	0	8	1	9h	0	12	2	24h	5	7
23	2h	0	10	5	9h	0	9	4	24h	21	28
25	2h	0	8	10	9h	0	9	6	24h	14	19
27	2h	0	9	2	9h	0	15	7	24h	5	15
28	2h	0	8	5	9h	0	8	8	24h	2	16
29	2h	0	9	52	9h	0	8	11	24h	1	10
30	2h	0	8	51	9h	0	8	13	24h	9	17
32	2h	0	7	50	9h	1	11	16	24h	11	19
62	2h	0	8	49	9h	0	7	17	24h	14	15
64	2h	0	8	48	9h	0	11	19	24h	16	23
60	2h	0	7	47	9h	14	16	20	24h	0	14
59	2h	0	6	45	9h	5	16	77	24h	0	16
57	2h	0	9	44	9h	0	12	79	24h	4	17
56	2h	0	7	43	9h	0	2	80	24h	13	17
55	2h	0	7	41	9h	0	6	81	24h	3	9
54	2h	0	8	38	9h	0	7	84	24h	0	12
53	2h	0	8	36	9h	0	9	107	24h	20	26
				35	9h	0	8	108	24h	3	15
				34	9h	0	16	109	24h	0	12
				33	9h	0	9	110	24h	8	17
								112	24h	17	21
								113	24h	15	33
								114	24h	0	2
								115	24h	23	35
								116	24h	6	10
								117	24h	12	14
								118	24h	20	24
								131	24h	2	3
								133	24h	4	16
								134	24h	12	24
								135	24h	0	8
								136	24h	0	5
