# Supplementary material for: Human embryo polarization requires PLC signaling to mediate trophectoderm specification
Source: eLife. 2021 Sep 27;10:e65068. doi: 10.7554/eLife.65068 (PMC8514238; doi:10.7554/eLife.65068)
Supplement: Figure 2—source data 1. — This file contains the source data used to make the graphs presented in Figure 2 and Figure 2—figure supplements 1 and 2. GraphPad Prism was utilized to visually represent the quantitative data. [file elife-65068-fig2-data1.xlsx]

## Sheet: Figure 2c
POLARIZATION IN PLC SiRNA TREATED EMBRYOS
Sorted by F-actin ratio
Control siRNA								PLCB1+PLCE1 siRNA
Embryo No.	Total cell number	F-actin polarized	Pard6 polarized	F-actin ratio	Par6 ratio	IVF clinic	Genotype	Embryo No.	Total cell number	F-actin polarized	Pard6 polarized	F-actin ratio	Par6 ratio	IVF clinic	Genotype
7	4	0	0	0	0	Caltech-USC	2PN	17	2	0	0	0	0	Caltech-USC	2PN
10	4	0	0	0	0	Caltech-USC	2PN	18	7	0	0	0	0	Caltech-USC	2PN
11	1	0	0	0	0	Caltech-USC	2PN	9	9	0	0	0	0	China	3PN
4	11	0	0	0	0	China	3PN	11	11	5	0	0.454545	0	China	3PN
1	12	6	1	0.5	0.0833333	Caltech-USC	2PN	10	10	1	1	0.1	0.1	China	3PN
2	10	1	1	0.1	0.1	China	3PN	16	10	8	1	0.8	0.1	Caltech-USC	2PN
5	12	7	3	0.583333	0.25	Caltech-USC	2PN	7	6	0	1	0	0.166667	China	3PN
9	7	7	2	1	0.285714	Caltech-USC	2PN	12	6	0	1	0	0.166667	China	3PN
3	5	3	2	0.6	0.4	Caltech-USC	2PN	14	11	0	2	0	0.181818	Caltech-USC	2PN
1	16	2	9	0.125	0.5625	China	3PN	15	15	9	3	0.6	0.2	Caltech-USC	2PN
3	17	0	12	0	0.705882	China	3PN	8	18	9	6	0.5	0.333333	China	3PN
2	14	10	10	0.714286	0.714286	Caltech-USC	2PN	19	22	20	20	0.909091	0.909091	Caltech-USC	2PN
5	9	4	7	0.444444	0.777778	China	3PN					0.280303	0.179798
13	14	7	11	0.5	0.785714	Caltech-USC	2PN
4	15	14	12	0.933333	0.8	Caltech-USC	2PN
12	17	14	14	0.823529	0.823529	Caltech-USC	2PN
8	16	16	15	1	0.9375	Caltech-USC	2PN
				0.430819	0.425073

## Sheet: Figure 2d
ANALYSIS OF PARD6 IN THE RNAi EXPERIMENT
Apical F-actin enrichment (Apical /cytoplasm ratio) in PLC siRNA treated embryos
Control siRNA	PLC siRNA
1.8022	2.09505
1.45891	0.76355
1.33739	0.846225
2.08644	1.43653
1.37343	0.756184
2.04895	1.05701
1.47557	1.69844
1.4438	2.26818
4.7705
	1.22427
3.05133
	1.38815
1.26854
	2.46753
1.07883	1.48043
2.33333	1.37108
3.78938
1.79417	1.06932
2.12437	0.605263
5.08582	0.925178
	1.8443
6.94098
	2.66369
3.29083
2.37313	0.962793
1.76228	0.886486
2.21411	0.587589
	1.21821
2.2355
	1.11409
2.56534
	1.4469
5.46619
	2.51872
4.13154
	0.810757
1.93759
	1.14059
1.18548
	1.47826
1.28018
1.92524	1.53816
2.87447	0.941573
	0.613892
	0.961806
2.58348
2.32056	1.06284
2.13436	0.84885
12.1545	0.58209
4.82452	0.759588
1.78046	1.03125
1.7538
	1.5131
0.731736
	1.43536
	1.12652
	2.24805
	1.68257
	2.05412
	1.75214
	0.303704
	0.337349
0.784558	0.988618
0.680332	0.784073
0.663826	0.646598
1.13161	0.302804
0.987591	0.605489
0.352294
	0.97634
0.951359
	1.09588
0.443124
	1.3651
0.762557
	0.629635
1.1009	0.781726
0.669946	1.30066
0.366772	1.20539
0.747145	1.49758
0.357704
	0.395232
0.630201
	1.09257
2.24197	0.685362
1.51773	0.694984
0.269976	0.765154
0.444291	0.482732
0.964039
	0.602477
0.671831
	0.648726
0.377022
	0.366827
0.601163
	0.719737
0.599145
	0.623672
0.649195
	0.420414
0.670556
	0.514087
0.729712
	0.348562
0.466375
	0.70602
1.05275
	0.83988
0.875268
	0.603364
1.36481
	0.763156
0.663826
	0.535483
0.507526
	0.959728
0.498297
	0.600501
0.604012
	0.54036
0.650557
	0.697662
0.619688
	0.55565
0.6666
	0.548595
1.0437
	0.64716
1.69907
	0.466677
0.59731
	0.616711
0.485714
	0.374764
0.492067	0.777102
0.901121
	0.776709
0.570857
	0.566092
0.970667	0.435819
1.2527	0.728553
0.970841	0.674524
0.858754	0.499168
0.879309
	0.426415
0.913889
	0.425638
1.07766
	0.183322
1.04241
	0.273198
	0.359685

## Sheet: Figure 2e
ANALYSIS OF PARD6 IN THE RNAi EXPERIMENT
Apical PARD6 enrichment (Apical /cytoplasm ratio) in PLC siRNA treated embryos
Control siRNA	PLC siRNA
2.99967	1.25661
2.81495	1.22477
4.038	1.59066
2.42695	1.38221
2.96198	1.12717
2.80338	1.33994
2.76453	1.12698
2.39647	1.05771
3.60291
	1.83732
1.82279
	1.64762
4.16865
	1.29356
2.81319	1.8531
2.86654	1.36874
1.83538	1.22863
1.14216	1.52226
1.39051	1.18106
1.37428	1.09459
	1.04741
1.08124
	1.03228
0.925833
1.22536	1.06577
0.99958	1.05822
0.678613	0.881838
	1.21941
3.39464
	1.16911
1.89806
	2.04274
2.55576
	1.77015
2.93978
	1.1438
2.74564
	0.883333
1.53573
	1.73418
2.11372
1.95813	1.38974
2.36979	1.6297
0.769612	1.14821
	1.45098
1.80074
1.61834	1.27912
1.76219	1.19597
1.36888	0.860846
2.17026	1.32409
2.33111	1.3114
1.56026
	2.85351
1.83403
	2.72034
	2.69155
	4.17593
	2.61588
	2.46365
	2.28987
	0.661509
	0.366617
1.05364	0.910989
1.23221	1.0137
1.22541	0.952225
1.22477	0.880838
1.50029
	0.87549
	1.13446
	1.01937
	1.02112
1.53121	1.1848
0.839115	1.26088
0.975546	0.956818
1.28986	0.868824
1.47102
	1.1503
1.30991
	1.04354
1.47571	0.972299
1.38224	1.06286
1.77751	0.95403
1.1	0.800811
1.24885
	1.07546
0.991597
	1.30166
0.877061
	0.983579
1.01472
	1.01894
1.35503
	1.00658
1.12674
	0.942228
0.863557
	0.85227
1.05306
	1.00419
0.992934
	1.11702
0.980234
	1.22049
1.10052
	1.17412
1.32186
	1.13536
0.663826
	0.949629
0.940219
	1.09541
1.13468
	1.21435
0.920378
	1.10394
1.27847
	0.971628
0.949589
	0.714106
1.21872
	0.771898
1.69065
	0.827171
1.5027
	0.914321
1.28707
	1.23655
1.12993
	1.0145
0.970944	0.858351
1.84589
	0.732223
1.29298
	0.961341
1.60568	0.855741
1.42898	1.13603
1.39011	0.841121
0.994554	0.810802
1.14467
	1.18936
1.36329
	1.12445
1.02253
	1.15544
1.15814
	0.982941
	1.15243

## Sheet: Figure 2 Supplement 1b
POLARIZATION IN PLC INHIBITED EMBRYOS
Sorted by F-actin ratio
MEDIA CONTROL								DMSO 35mM								PLCi 5uM								DMSO 53mM								PLCi 7.5uM
Embryo No.	F-actin polarized	Pard6 polarized	Total cell No	F-actin ratio	Par6 ratio	GATA3+ cells	GATA3 ratio	Embryo No.	F-actin polarized	Pard6 polarized	Total cell No	F-actin ratio	Par6 ratio	GATA3+ cells	GATA3 ratio	Embryo No.	F-actin polarized	Pard6 polarized	Total cell No	F-actin ratio	Par6 ratio	GATA3+ cells	GATA3 ratio	Embryo No.	F-actin polarized	Pard6 polarized	Total cell No	F-actin ratio	Par6 ratio	GATA3+ cells	GATA3 ratio	Embryo No.	F-actin polarized	Pard6 polarized	Total cell No	F-actin ratio	Par6 ratio	GATA3+ cells	GATA3 ratio
77	2	0	16	0.125	0	5	0.3125	119	0	0	11	0	0	0	0	69	0	0	8	0	0	0	0	584	0	0	10	0	0	0	0	638	0	0	14	0	0	0	0
78	4	0	16	0.25	0	4	0.25	140	0	0	13	0	0	0	0	70	0	0	12	0	0	0	0	582	0	0	4	0	0	0	0	192	0	0	6	0	0	0	0
79	6	4	17	0.352941	0.235294	4	0.235294	142	0	0	4	0	0	0	0	97	0	0	8	0	0	0	0	213	0	0	9	0	0	0	0	194	0	0	18	0	0	0	0
80	11	13	17	0.647059	0.764706	7	0.411765	157	0	5	13	0	0.384615	1	0.0769231	98	0	2	12	0	0.166667	6	0.5	218	0	0	9	0	0	0	0	195	0	0	11	0	0	0	0
81	7	3	9	0.777778	0.333333	0	0	158	0	0	10	0	0	1	0.1	125	0	3	18	0	0.166667	3	0.166667	219	0	0	8	0	0	0	0	197	0	0	2	0	0	0	0
84	12	0	12	1	0	0	0	159	0	0	10	0	0	0	0	128	0	0	8	0	0	0	0	242	0	0	10	0	0	0	0	223	0	0	9	0	0	0	0
87	17	17	18	0.944444	0.944444	13	0.722222	138	2	1	10	0.2	0.1	0	0	130	0	0	10	0	0	0	0	243	0	0	8	0	0	0	0	226	0	0	3	0	0	0	0
107	5	20	26	0.192308	0.769231	21	0.807692	120	5	7	14	0.357143	0.5	0	0	96	2	2	18	0.111111	0.111111	0	0	246	0	0	7	0	0	0	0	238	0	0	12	0	0	0	0
108	12	3	15	0.8	0.2	0	0	122	7	8	18	0.388889	0.444444	5	0.277778	104	6	26	37	0.162162	0.702703	29	0.783784	211	1	1	18	0.0555556	0.0555556	0	0	585	2	2	14	0.142857	0.142857	0	0
109	0	0	12	0	0	0	0	123	12	14	24	0.5	0.583333	5	0.208333	68	3	0	12	0.25	0	4	0.333333	241	3	17	20	0.15	0.85	5	0.25	193	2	4	13	0.153846	0.307692	2	0.153846
110	8	8	17	0.470588	0.470588	8	0.470588	160	9	6	17	0.529412	0.352941	1	0.0588235	148	5	1	14	0.357143	0.0714286	0	0	220	4	8	25	0.16	0.32	0	0	579	1	0	6	0.166667	0	0	0
112	17	17	21	0.809524	0.809524	20	0.952381	121	9	11	16	0.5625	0.6875	9	0.5625	126	4	2	11	0.363636	0.181818	0	0	217	2	0	12	0.166667	0	0	0	637	2	0	11	0.181818	0	0	0
113	15	15	33	0.454545	0.454545	28	0.848485	141	11	12	16	0.6875	0.75	5	0.3125	101	6	6	15	0.4	0.4	0	0	587	4	5	16	0.25	0.3125	0	0	634	2	0	8	0.25	0	0	0
114	0	0	2	0	0	0	0	124	20	7	28	0.714286	0.25	3	0.107143	65	5	3	12	0.416667	0.25	1	0.0833333	202	2	2	5	0.4	0.4	0	0	198	2	0	8	0.25	0	0	0
115	23	23	35	0.657143	0.657143	20	0.571429	156	22	22	30	0.733333	0.733333	18	0.6	103	12	14	28	0.428571	0.5	7	0.25	250	8	8	15	0.533333	0.533333	0	0	229	4	3	12	0.333333	0.25	0	0
116	0	6	10	0	0.6	0	0	92	16	10	21	0.761905	0.47619	1	0.047619	105	6	4	13	0.461538	0.307692	0	0	248	24	24	29	0.827586	0.827586	15	0.517241	200	3	0	8	0.375	0	0	0
117	10	12	14	0.714286	0.857143	5	0.357143	137	21	14	27	0.777778	0.518519	8	0.296296	146	6	1	13	0.461538	0.0769231	0	0	216	16	14	19	0.842105	0.736842	4	0.210526	230	8	6	15	0.533333	0.4	0	0
118	8	20	24	0.333333	0.833333	21	0.875	91	18	17	23	0.782609	0.73913	0	0	144	8	3	17	0.470588	0.176471	2	0.117647	244	14	0	16	0.875	0	1	0.0625	232	8	14	15	0.533333	0.933333	2	0.133333
131	2	2	3	0.666667	0.666667	0	0	139	8	7	10	0.8	0.7	0	0	99	6	0	12	0.5	0	0	0	245	17	17	19	0.894737	0.894737	3	0.157895	225	4	3	7	0.571429	0.428571	0	0
133	2	4	16	0.125	0.25	0	0					0.410282	0.38		0.139364	100	10	4	17	0.588235	0.235294	3	0.176471	249	21	21	23	0.913043	0.913043	2	0.0869565	635	9	3	15	0.6	0.2	0	0
134	17	12	24	0.708333	0.5	12	0.5									129	9	8	15	0.6	0.533333	3	0.2	214	29	29	31	0.935484	0.935484	30	0.967742	580	20	15	24	0.833333	0.625	6	0.25
135	0	0	8	0	0	0	0									95	15	4	20	0.75	0.2	7	0.35	633	15	12	16	0.9375	0.75	0	0	196	12	5	13	0.923077	0.384615	6	0.461538
136	0	0	5	0	0	0	0									127	24	25	32	0.75	0.78125	23	0.71875	215	2	0	2	1	0	0	0	224	4	4	4	1	1	4	1
149	13	13	15	0.866667	0.866667	4	0.266667									102	14	12	18	0.777778	0.666667	5	0.277778	247	14	14	14	1	1	6	0.428571	227	16	16	16	1	1	6	0.375
150	0	0	4	0	0	0	0									147	14	14	16	0.875	0.875	9	0.5625					0.414209	0.355378	2.75	0.111726					0.327001	0.236336		0.0989049
151	13	13	13	1	1	6	0.461538													0.348959	0.256121		0.180811
152	0	1	12	0	0.0833333	0	0
153	0	0	11	0	0	0	0
201	0	0	10	0	0	0	0
203	2	0	12	0.166667	0	0	0
204	39	39	51	0.764706	0.764706	51	1
205	1	1	8	0.125	0.125	0	0
206	5	20	28	0.178571	0.714286	21	0.75
207	11	9	16	0.6875	0.5625	1	0.0625
208	15	2	18	0.833333	0.111111	1	0.0555556
209	16	4	16	1	0.25	4	0.25
210	8	8	12	0.666667	0.666667	7	0.583333
233	0	0	12	0	0	0	0
234	12	12	13	0.923077	0.923077	8	0.615385
235	8	0	8	1	0	0	0
236	0	0	11	0	0	0	0
237	7	17	17	0.411765	1	3	0.176471
				0.444117	0.390793		0.274665

## Sheet: Figure 2 Supplement 1c
CELLULAR DEGENERATION IN THE PLCi EXPERIMENT
Control	DMSO 35mM	PLCi 5uM	DMSO 53mM	PLCi 7.5uM	DMSO 70mM	PLCi 10uM
11.11	0	0	0	0	0	71.43
0	20	0	0	0	0	0
0	0	50	0	0	42.86	0
0	28.57	0	0	0	0	85.71
0	0	0	0	0	0	100
0	0	0	0	0	0	0
0	0	0	0	50	0	0
0	0	10	0	0	0	50
0	0	0	0	0	0	41.67
0	0	0	0	0		12.5
0	50	0	0	0
0	0	0	0	0
0	0	0	0	50
0	11.11	0	0	0
0	0	16.67	0	28.57
0	0	0	0	22.22
0	60	0	0	0
0	0	0	16.67	0
0	0	0	0	22.22
0	0	0	0	0
0	0	9.09
0	0	0
0	0	0
0		0
33		0
0		0
0		0
0		0
0		0
0		0
0		0
0
0
0
0
22
0
0
0
0
0
0
0
0
0
0
0
0
0
0
0
0
0
0
0
0
0
0
0
0
0
0
37.5
0
0
0

## Sheet: Figure 2 Supplement 1e and f
F-ACTIN AND PARD6 ENRICHMENT IN PLC INHIBITOR TREATED EMBRYOS
MEDIA CONTROL	F-actin apical enrichment	Pard6 apical enrichment	Ratio F-actin (apical/basal)	Ratio Pard6 (apical/basal)	F-actin apical (per embryo)	Pard6b apical (per embryo)		DMSO 35mM	F-actin apical enrichment	Pard6 apical enrichment	Ratio F-actin (apical/basal)	Ratio Pard6 (apical/basal)	F-actin apical (per embryo)	Pard6b apical (per embryo)		DMSO 53mM	F-actin apical enrichment	Pard6 apical enrichment	Ratio F-actin (apical/basal)	Ratio Pard6 (apical/basal)	F-actin apical (per embryo)	Pard6b apical (per embryo)		U73122 5uM	F-actin apical enrichment	Pard6 apical enrichment	Ratio F-actin (apical/basal)	Ratio Pard6 (apical/basal)	F-actin apical (per embryo)	Pard6b apical (per embryo)		U73122 7.5uM	F-actin apical enrichment	Pard6 apical enrichment	Ratio F-actin (apical/basal)	Ratio Pard6 (apical/basal)	F-actin apical (per embryo)	Pard6b apical (per embryo)
Embryo 20								Embryo 92								Embryo 584								Embryo 70								Embryo 638
apical	7.72	7.56	0.816931	0.883178	0.863103	1.16381		20181227 c1 phalloidin c2 pard6 c3 gata3.lif - control DMSO/92:0163-0438-0357:c:3/5 z:33/73 - control DMSO/92	100.01	47.34	2.38517	2.24042	2.35614	1.96926		191228 DMSO and U73122 7.5uM C1-Factin C2-GATA3 C3- DAPI BF C4-PARD6B.lif - dmso/584:0116-0646-0422:c:1/5 z:22/57 - dmso/584	46.8	12.35	0.97358	1.15637	1.02464	1.26039		20181227 c1 phalloidin c2 pard6 c3 gata3.lif - test/70:0188-0239-0374:c:3/5 z:38/73 - test/70	27.77	34.6	0.681974	1.18778	0.809823	1.20865		191228 DMSO and U73122 7.5uM C1-Factin C2-GATA3 C3- DAPI BF C4-PARD6B.lif - u73122/638:0141-0509-0802:c:1/5 z:29/59 - u73122/638	19.84	77.13	1.0604	0.743786	0.759917	1.00989
cytoplasm	5.24	8.14						20181227 c1 phalloidin c2 pard6 c3 gata3.lif - control DMSO/92:0163-0422-0423:c:3/5 z:33/73 - control DMSO/92	16.42	19.69						191228 DMSO and U73122 7.5uM C1-Factin C2-GATA3 C3- DAPI BF C4-PARD6B.lif - dmso/584:0116-0634-0434:c:1/5 z:22/57 - dmso/584	25.95	14.7						20181227 c1 phalloidin c2 pard6 c3 gata3.lif - test/70:0188-0252-0411:c:3/5 z:38/73 - test/70	35.87	33.54						191228 DMSO and U73122 7.5uM C1-Factin C2-GATA3 C3- DAPI BF C4-PARD6B.lif - u73122/638:0141-0511-0788:c:1/5 z:29/59 - u73122/638	32.54	16.21
basal	9.45	8.56						20181227 c1 phalloidin c2 pard6 c3 gata3.lif - control DMSO/92:0163-0569-0364:c:3/5 z:33/73 - control DMSO/92	41.93	21.13						191228 DMSO and U73122 7.5uM C1-Factin C2-GATA3 C3- DAPI BF C4-PARD6B.lif - dmso/584:0116-0608-0543:c:1/5 z:22/57 - dmso/584	48.07	10.68						20181227 c1 phalloidin c2 pard6 c3 gata3.lif - test/70:0188-0346-0403:c:3/5 z:38/73 - test/70	40.72	29.13						191228 DMSO and U73122 7.5uM C1-Factin C2-GATA3 C3- DAPI BF C4-PARD6B.lif - u73122/638:0141-0545-0689:c:1/5 z:29/59 - u73122/638	18.71	10.3
180914 2 9 24h Gata3 Factin Par6.lif - 24h/20:0162-0655-0662:c:2/5 z:33/84 - 24h/20	8.91	11.01	0.953961	1.36262				20181227 c1 phalloidin c2 pard6 c3 gata3.lif - control DMSO/92:0163-0632-0288:c:3/5 z:33/73 - control DMSO/92	81.86	41.35	2.01974	1.91435				191228 DMSO and U73122 7.5uM C1-Factin C2-GATA3 C3- DAPI BF C4-PARD6B.lif - dmso/584:0106-0527-0707:c:1/5 z:22/57 - dmso/584	53.13	13.07	1.35952	1.14851				20181227 c1 phalloidin c2 pard6 c3 gata3.lif - test/70:0188-0379-0294:c:3/5 z:38/73 - test/70	30.54	21.79	0.736969	0.6955				191228 DMSO and U73122 7.5uM C1-Factin C2-GATA3 C3- DAPI BF C4-PARD6B.lif - u73122/638:0106-0309-0544:c:1/5 z:21/59 - u73122/638	38.21	79.79	0.950734	0.947864
180914 2 9 24h Gata3 Factin Par6.lif - 24h/20:0162-0623-0684:c:2/5 z:33/84 - 24h/20	4.93	15.96						20181227 c1 phalloidin c2 pard6 c3 gata3.lif - control DMSO/92:0163-0624-0310:c:3/5 z:33/73 - control DMSO/92	39.18	22.83						191228 DMSO and U73122 7.5uM C1-Factin C2-GATA3 C3- DAPI BF C4-PARD6B.lif - dmso/584:0106-0494-0680:c:1/5 z:22/57 - dmso/584	30.42	11.36						20181227 c1 phalloidin c2 pard6 c3 gata3.lif - test/70:0188-0405-0351:c:3/5 z:38/73 - test/70	40.61	35.28						191228 DMSO and U73122 7.5uM C1-Factin C2-GATA3 C3- DAPI BF C4-PARD6B.lif - u73122/638:0106-0395-0527:c:1/5 z:21/59 - u73122/638	23.33	22.31
180914 2 9 24h Gata3 Factin Par6.lif - 24h/20:0162-0488-0580:c:2/5 z:33/84 - 24h/20	9.34	8.08						20181227 c1 phalloidin c2 pard6 c3 gata3.lif - control DMSO/92:0163-0677-0377:c:3/5 z:33/73 - control DMSO/92	40.53	21.6						191228 DMSO and U73122 7.5uM C1-Factin C2-GATA3 C3- DAPI BF C4-PARD6B.lif - dmso/584:0106-0480-0538:c:1/5 z:22/57 - dmso/584	39.08	11.38						20181227 c1 phalloidin c2 pard6 c3 gata3.lif - test/70:0188-0463-0411:c:3/5 z:38/73 - test/70	41.44	31.33						191228 DMSO and U73122 7.5uM C1-Factin C2-GATA3 C3- DAPI BF C4-PARD6B.lif - u73122/638:0106-0438-0491:c:1/5 z:21/59 - u73122/638	40.19	27.77
180914 2 9 24h Gata3 Factin Par6.lif - 24h/20:0222-0193-0387:c:2/5 z:45/84 - 24h/20	6.31	9.99	0.818418	1.24564				20181227 c1 phalloidin c2 pard6 c3 gata3.lif - control DMSO/92:0163-0380-0658:c:3/5 z:33/73 - control DMSO/92	35.52	47.08	1.52381	2.2494				191228 DMSO and U73122 7.5uM C1-Factin C2-GATA3 C3- DAPI BF C4-PARD6B.lif - dmso/584:0091-0418-0408:c:1/5 z:19/57 - dmso/584	48.12	14.94	0.879547	1.47628				20181227 c1 phalloidin c2 pard6 c3 gata3.lif - test/70:0188-0272-0626:c:3/5 z:38/73 - test/70	33.21	52.68	0.860809	1.37331				191228 DMSO and U73122 7.5uM C1-Factin C2-GATA3 C3- DAPI BF C4-PARD6B.lif - u73122/638:0106-0466-0401:c:1/5 z:21/59 - u73122/638	17.41	37.76	0.432977	1.35071
180914 2 9 24h Gata3 Factin Par6.lif - 24h/20:0222-0230-0427:c:2/5 z:45/84 - 24h/20	4.27	6.94						20181227 c1 phalloidin c2 pard6 c3 gata3.lif - control DMSO/92:0163-0344-0694:c:3/5 z:33/73 - control DMSO/92	15.85	23.5						191228 DMSO and U73122 7.5uM C1-Factin C2-GATA3 C3- DAPI BF C4-PARD6B.lif - dmso/584:0091-0417-0445:c:1/5 z:19/57 - dmso/584	25.64	9.61						20181227 c1 phalloidin c2 pard6 c3 gata3.lif - test/70:0188-0293-0599:c:3/5 z:38/73 - test/70	30.25	36.39						191228 DMSO and U73122 7.5uM C1-Factin C2-GATA3 C3- DAPI BF C4-PARD6B.lif - u73122/638:0106-0483-0418:c:1/5 z:21/59 - u73122/638	28.72	21.25
180914 2 9 24h Gata3 Factin Par6.lif - 24h/20:0222-0223-0551:c:2/5 z:45/84 - 24h/20	7.71	8.02						20181227 c1 phalloidin c2 pard6 c3 gata3.lif - control DMSO/92:0163-0453-0747:c:3/5 z:33/73 - control DMSO/92	23.31	20.93						191228 DMSO and U73122 7.5uM C1-Factin C2-GATA3 C3- DAPI BF C4-PARD6B.lif - dmso/584:0091-0447-0499:c:1/5 z:19/57 - dmso/584	54.71	10.12						20181227 c1 phalloidin c2 pard6 c3 gata3.lif - test/70:0188-0310-0528:c:3/5 z:38/73 - test/70	38.58	38.36						191228 DMSO and U73122 7.5uM C1-Factin C2-GATA3 C3- DAPI BF C4-PARD6B.lif - u73122/638:0106-0441-0492:c:1/5 z:21/59 - u73122/638	40.21	21.69
Embryo 19								20181227 c1 phalloidin c2 pard6 c3 gata3.lif - control DMSO/92:0163-0561-0790:c:3/5 z:33/73 - control DMSO/92	85.34	24.11	3.35324	1.22947				191228 DMSO and U73122 7.5uM C1-Factin C2-GATA3 C3- DAPI BF C4-PARD6B.lif - dmso/584:0121-0290-0517:c:1/5 z:25/57 - dmso/584	50.94		0.885913					20181227 c1 phalloidin c2 pard6 c3 gata3.lif - test/70:0188-0652-0603:c:3/5 z:38/73 - test/70	45.45	56.8	0.786332	1.84416				191228 DMSO and U73122 7.5uM C1-Factin C2-GATA3 C3- DAPI BF C4-PARD6B.lif - u73122/638:0106-0668-0587:c:1/5 z:21/59 - u73122/638	23.09	56.52	0.595564	0.997207
180914 2 9 24h Gata3 Factin Par6.lif - 24h/19:0197-0543-0358:c:2/5 z:40/84 - 24h/19	20.15	26.33	3.74535	2.46767	1.93213	2.09015		20181227 c1 phalloidin c2 pard6 c3 gata3.lif - control DMSO/92:0163-0551-0753:c:3/5 z:33/73 - control DMSO/92	20.52	19.89						191228 DMSO and U73122 7.5uM C1-Factin C2-GATA3 C3- DAPI BF C4-PARD6B.lif - dmso/584:0121-0309-0496:c:1/5 z:25/57 - dmso/584	11.61							20181227 c1 phalloidin c2 pard6 c3 gata3.lif - test/70:0188-0643-0605:c:3/5 z:38/73 - test/70	32.68	39.78						191228 DMSO and U73122 7.5uM C1-Factin C2-GATA3 C3- DAPI BF C4-PARD6B.lif - u73122/638:0106-0623-0597:c:1/5 z:21/59 - u73122/638	36.25	13.56
180914 2 9 24h Gata3 Factin Par6.lif - 24h/19:0197-0549-0389:c:2/5 z:40/84 - 24h/19	5.97	11.89						20181227 c1 phalloidin c2 pard6 c3 gata3.lif - control DMSO/92:0163-0600-0697:c:3/5 z:33/73 - control DMSO/92	25.45	19.61						191228 DMSO and U73122 7.5uM C1-Factin C2-GATA3 C3- DAPI BF C4-PARD6B.lif - dmso/584:0121-0388-0496:c:1/5 z:25/57 - dmso/584	57.5							20181227 c1 phalloidin c2 pard6 c3 gata3.lif - test/70:0188-0606-0550:c:3/5 z:38/73 - test/70	57.8	30.8						191228 DMSO and U73122 7.5uM C1-Factin C2-GATA3 C3- DAPI BF C4-PARD6B.lif - u73122/638:0106-0570-0515:c:1/5 z:21/59 - u73122/638	38.77	15.01
180914 2 9 24h Gata3 Factin Par6.lif - 24h/19:0197-0444-0334:c:2/5 z:40/84 - 24h/19	5.38	10.67						20181227 c1 phalloidin c2 pard6 c3 gata3.lif - control DMSO/92:0163-0676-0738:c:3/5 z:33/73 - control DMSO/92	85.63	31.28	2.70211	1.78132				Embryo 633								20181227 c1 phalloidin c2 pard6 c3 gata3.lif - test/70:0188-0680-0442:c:3/5 z:38/73 - test/70	45.19	25.08	0.983032	0.942503				Embryo 635
180914 2 9 24h Gata3 Factin Par6.lif - 24h/19:0197-0584-0630:c:2/5 z:40/84 - 24h/19	7.63	18.36	1.56996	2.02426				20181227 c1 phalloidin c2 pard6 c3 gata3.lif - control DMSO/92:0163-0673-0714:c:3/5 z:33/73 - control DMSO/92	30.92	26.14						191228 DMSO and U73122 7.5uM C1-Factin C2-GATA3 C3- DAPI BF C4-PARD6B.lif - dmso/633:0131-0310-0600:c:1/5 z:27/63 - dmso/633	80.72	24.12	1.68976	1.19524	1.93242	1.20567		20181227 c1 phalloidin c2 pard6 c3 gata3.lif - test/70:0188-0656-0461:c:3/5 z:38/73 - test/70	46.06	23.53						191228 DMSO and U73122 7.5uM C1-Factin C2-GATA3 C3- DAPI BF C4-PARD6B.lif - u73122/635:0126-0441-0766:c:1/5 z:26/60 - u73122/635	54.4	59.09	1.37131	1.18769	1.50428	0.930179
180914 2 9 24h Gata3 Factin Par6.lif - 24h/19:0197-0550-0618:c:2/5 z:40/84 - 24h/19	4.72	13.19						20181227 c1 phalloidin c2 pard6 c3 gata3.lif - control DMSO/92:0163-0661-0661:c:3/5 z:33/73 - control DMSO/92	31.69	17.56						191228 DMSO and U73122 7.5uM C1-Factin C2-GATA3 C3- DAPI BF C4-PARD6B.lif - dmso/633:0131-0310-0599:c:1/5 z:27/63 - dmso/633	36.73	18.62						20181227 c1 phalloidin c2 pard6 c3 gata3.lif - test/70:0188-0535-0483:c:3/5 z:38/73 - test/70	45.97	26.61						191228 DMSO and U73122 7.5uM C1-Factin C2-GATA3 C3- DAPI BF C4-PARD6B.lif - u73122/635:0126-0447-0752:c:1/5 z:26/60 - u73122/635	31.96	20.41
180914 2 9 24h Gata3 Factin Par6.lif - 24h/19:0197-0439-0716:c:2/5 z:40/84 - 24h/19	4.86	9.07						20181227 c1 phalloidin c2 pard6 c3 gata3.lif - control DMSO/92:0163-0854-0502:c:3/5 z:33/73 - control DMSO/92	44.11	41.05	2.15276	2.40058				191228 DMSO and U73122 7.5uM C1-Factin C2-GATA3 C3- DAPI BF C4-PARD6B.lif - dmso/633:0131-0392-0600:c:1/5 z:27/63 - dmso/633	47.77	20.18						Embryo 69								191228 DMSO and U73122 7.5uM C1-Factin C2-GATA3 C3- DAPI BF C4-PARD6B.lif - u73122/635:0126-0467-0693:c:1/5 z:26/60 - u73122/635	39.67	23.48
180914 2 9 24h Gata3 Factin Par6.lif - 24h/19:0177-0328-0760:c:2/5 z:36/84 - 24h/19	15.67	15.12	1.52878	2.00797				20181227 c1 phalloidin c2 pard6 c3 gata3.lif - control DMSO/92:0163-0848-0522:c:3/5 z:33/73 - control DMSO/92	6.3	26.44						191228 DMSO and U73122 7.5uM C1-Factin C2-GATA3 C3- DAPI BF C4-PARD6B.lif - dmso/633:0131-0468-0710:c:1/5 z:27/63 - dmso/633	51.06	22.34	2.40056	1.06992				20181227 c1 phalloidin c2 pard6 c3 gata3.lif - test/69:0213-0309-0629:c:3/5 z:43/73 - test/69	35.43	34.62	0.929921	1.29179	0.962672	1.01864		191228 DMSO and U73122 7.5uM C1-Factin C2-GATA3 C3- DAPI BF C4-PARD6B.lif - u73122/635:0126-0279-0600:c:1/5 z:26/60 - u73122/635	53.23	70.53	0.937148	1.37457
180914 2 9 24h Gata3 Factin Par6.lif - 24h/19:0177-0326-0705:c:2/5 z:36/84 - 24h/19	5.94	9.9						20181227 c1 phalloidin c2 pard6 c3 gata3.lif - control DMSO/92:0163-0783-0521:c:3/5 z:33/73 - control DMSO/92	20.49	17.1						191228 DMSO and U73122 7.5uM C1-Factin C2-GATA3 C3- DAPI BF C4-PARD6B.lif - dmso/633:0131-0478-0683:c:1/5 z:27/63 - dmso/633	2.93	18.18						20181227 c1 phalloidin c2 pard6 c3 gata3.lif - test/69:0213-0358-0642:c:3/5 z:43/73 - test/69	35.41	28.02						191228 DMSO and U73122 7.5uM C1-Factin C2-GATA3 C3- DAPI BF C4-PARD6B.lif - u73122/635:0126-0348-0615:c:1/5 z:26/60 - u73122/635	16.24	49.47
180914 2 9 24h Gata3 Factin Par6.lif - 24h/19:0177-0256-0686:c:2/5 z:36/84 - 24h/19	10.25	7.53						Embryo 91								191228 DMSO and U73122 7.5uM C1-Factin C2-GATA3 C3- DAPI BF C4-PARD6B.lif - dmso/633:0131-0527-0664:c:1/5 z:27/63 - dmso/633	21.27	20.88						20181227 c1 phalloidin c2 pard6 c3 gata3.lif - test/69:0213-0395-0563:c:3/5 z:43/73 - test/69	38.1	26.8						191228 DMSO and U73122 7.5uM C1-Factin C2-GATA3 C3- DAPI BF C4-PARD6B.lif - u73122/635:0126-0384-0616:c:1/5 z:26/60 - u73122/635	56.8	17.33
180914 2 9 24h Gata3 Factin Par6.lif - 24h/19:0177-0152-0648:c:2/5 z:36/84 - 24h/19	13.01	20.84	0.884432	1.86071				20181227 c1 phalloidin c2 pard6 c3 gata3.lif - control DMSO/91:0168-0122-0531:c:3/5 z:34/73 - control DMSO/91	64.77	32.36	3.77448	1.24318	2.08703	1.56175		191228 DMSO and U73122 7.5uM C1-Factin C2-GATA3 C3- DAPI BF C4-PARD6B.lif - dmso/633:0131-0619-0676:c:1/5 z:27/63 - dmso/633	67.56	20.73	1.17618	1.18187				20181227 c1 phalloidin c2 pard6 c3 gata3.lif - test/69:0173-0548-0553:c:3/5 z:35/73 - test/69	46.41	28.38	1.25196	0.974923				191228 DMSO and U73122 7.5uM C1-Factin C2-GATA3 C3- DAPI BF C4-PARD6B.lif - u73122/635:0126-0662-0502:c:1/5 z:26/60 - u73122/635	54.97	60.49	2.5917	1.0288
180914 2 9 24h Gata3 Factin Par6.lif - 24h/19:0177-0167-0589:c:2/5 z:36/84 - 24h/19	6.31	10.75						20181227 c1 phalloidin c2 pard6 c3 gata3.lif - control DMSO/91:0168-0163-0534:c:3/5 z:34/73 - control DMSO/91	22.4	22.9						191228 DMSO and U73122 7.5uM C1-Factin C2-GATA3 C3- DAPI BF C4-PARD6B.lif - dmso/633:0131-0602-0627:c:1/5 z:27/63 - dmso/633	27.44	18.09						20181227 c1 phalloidin c2 pard6 c3 gata3.lif - test/69:0173-0551-0604:c:3/5 z:35/73 - test/69	34.89	26.45						191228 DMSO and U73122 7.5uM C1-Factin C2-GATA3 C3- DAPI BF C4-PARD6B.lif - u73122/635:0126-0625-0489:c:1/5 z:26/60 - u73122/635	26.56	34.29
180914 2 9 24h Gata3 Factin Par6.lif - 24h/19:0177-0154-0533:c:2/5 z:36/84 - 24h/19	14.71	11.2						20181227 c1 phalloidin c2 pard6 c3 gata3.lif - control DMSO/91:0168-0213-0605:c:3/5 z:34/73 - control DMSO/91	17.16	26.03						191228 DMSO and U73122 7.5uM C1-Factin C2-GATA3 C3- DAPI BF C4-PARD6B.lif - dmso/633:0131-0611-0552:c:1/5 z:27/63 - dmso/633	57.44	17.54						20181227 c1 phalloidin c2 pard6 c3 gata3.lif - test/69:0173-0509-0501:c:3/5 z:35/73 - test/69	37.07	29.11						191228 DMSO and U73122 7.5uM C1-Factin C2-GATA3 C3- DAPI BF C4-PARD6B.lif - u73122/635:0126-0563-0427:c:1/5 z:26/60 - u73122/635	21.21	30.56
Emb ryo 17								20181227 c1 phalloidin c2 pard6 c3 gata3.lif - control DMSO/91:0168-0279-0696:c:3/5 z:34/73 - control DMSO/91	46.15	33.79	2.71471	1.27269				191228 DMSO and U73122 7.5uM C1-Factin C2-GATA3 C3- DAPI BF C4-PARD6B.lif - dmso/633:0131-0747-0445:c:1/5 z:27/63 - dmso/633	63.68	23.62	1.47135	1.37566				20181227 c1 phalloidin c2 pard6 c3 gata3.lif - test/69:0133-0575-0543:c:3/5 z:27/73 - test/69	66.16	26.17	1.05754	0.914396				191228 DMSO and U73122 7.5uM C1-Factin C2-GATA3 C3- DAPI BF C4-PARD6B.lif - u73122/635:0151-0472-0325:c:1/5 z:31/60 - u73122/635	35.93	72.09	1.24757	1.18982
180914 2 9 24h Par6.lif - 24h/17:0395-0112-0265:c:3/4 z:100/133 - 24h/17	48.32	73.86	3.14993	1.91298	2.31247	1.60115		20181227 c1 phalloidin c2 pard6 c3 gata3.lif - control DMSO/91:0168-0252-0653:c:3/5 z:34/73 - control DMSO/91	32.39	28.81						191228 DMSO and U73122 7.5uM C1-Factin C2-GATA3 C3- DAPI BF C4-PARD6B.lif - dmso/633:0131-0692-0435:c:1/5 z:27/63 - dmso/633	22.97	18.3						20181227 c1 phalloidin c2 pard6 c3 gata3.lif - test/69:0133-0525-0600:c:3/5 z:27/73 - test/69	45.32	26.33						191228 DMSO and U73122 7.5uM C1-Factin C2-GATA3 C3- DAPI BF C4-PARD6B.lif - u73122/635:0151-0479-0347:c:1/5 z:31/60 - u73122/635	23.85	25.81
180914 2 9 24h Par6.lif - 24h/17:0395-0113-0267:c:3/4 z:100/133 - 24h/17	27.67	31.05						20181227 c1 phalloidin c2 pard6 c3 gata3.lif - control DMSO/91:0168-0253-0592:c:3/5 z:34/73 - control DMSO/91	17	26.55						191228 DMSO and U73122 7.5uM C1-Factin C2-GATA3 C3- DAPI BF C4-PARD6B.lif - dmso/633:0131-0615-0444:c:1/5 z:27/63 - dmso/633	43.28	17.17						20181227 c1 phalloidin c2 pard6 c3 gata3.lif - test/69:0133-0461-0470:c:3/5 z:27/73 - test/69	62.56	28.62						191228 DMSO and U73122 7.5uM C1-Factin C2-GATA3 C3- DAPI BF C4-PARD6B.lif - u73122/635:0151-0437-0436:c:1/5 z:31/60 - u73122/635	28.8	27.92
180914 2 9 24h Par6.lif - 24h/17:0395-0134-0217:c:3/4 z:100/133 - 24h/17	15.34	38.61						20181227 c1 phalloidin c2 pard6 c3 gata3.lif - control DMSO/91:0168-0640-0504:c:3/5 z:34/73 - control DMSO/91	38.82	47.56	1.64841	2.32795				191228 DMSO and U73122 7.5uM C1-Factin C2-GATA3 C3- DAPI BF C4-PARD6B.lif - dmso/633:0156-0374-0347:c:1/5 z:32/63 - dmso/633	44.77		2.92423					20181227 c1 phalloidin c2 pard6 c3 gata3.lif - test/69:0133-0317-0484:c:3/5 z:27/73 - test/69	55.43	25.01	0.850675	0.972017				191228 DMSO and U73122 7.5uM C1-Factin C2-GATA3 C3- DAPI BF C4-PARD6B.lif - u73122/635:0176-0299-0468:c:1/5 z:38/60 - u73122/635	57.85	28.33	2.14896	1.08587
180914 2 9 24h Par6.lif - 24h/17:0395-0126-0156:c:3/4 z:100/133 - 24h/17	34.09	59.69	1.59448	1.48483				20181227 c1 phalloidin c2 pard6 c3 gata3.lif - control DMSO/91:0168-0620-0537:c:3/5 z:34/73 - control DMSO/91	22.46	30.81						191228 DMSO and U73122 7.5uM C1-Factin C2-GATA3 C3- DAPI BF C4-PARD6B.lif - dmso/633:0156-0458-0339:c:1/5 z:32/63 - dmso/633	12.38							20181227 c1 phalloidin c2 pard6 c3 gata3.lif - test/69:0133-0332-0411:c:3/5 z:27/73 - test/69	26.22	23.85						191228 DMSO and U73122 7.5uM C1-Factin C2-GATA3 C3- DAPI BF C4-PARD6B.lif - u73122/635:0176-0365-0470:c:1/5 z:38/60 - u73122/635	20.29	14.67
180914 2 9 24h Par6.lif - 24h/17:0395-0116-0152:c:3/4 z:100/133 - 24h/17	36.4	42						20181227 c1 phalloidin c2 pard6 c3 gata3.lif - control DMSO/91:0168-0558-0565:c:3/5 z:34/73 - control DMSO/91	23.55	20.43						191228 DMSO and U73122 7.5uM C1-Factin C2-GATA3 C3- DAPI BF C4-PARD6B.lif - dmso/633:0156-0359-0406:c:1/5 z:32/63 - dmso/633	15.31							20181227 c1 phalloidin c2 pard6 c3 gata3.lif - test/69:0133-0460-0471:c:3/5 z:27/73 - test/69	65.16	25.73						191228 DMSO and U73122 7.5uM C1-Factin C2-GATA3 C3- DAPI BF C4-PARD6B.lif - u73122/635:0176-0403-0462:c:1/5 z:38/60 - u73122/635	26.92	32.07
180914 2 9 24h Par6.lif - 24h/17:0395-0206-0121:c:3/4 z:100/133 - 24h/17	21.38	40.2						20181227 c1 phalloidin c2 pard6 c3 gata3.lif - control DMSO/91:0168-0535-0306:c:3/5 z:34/73 - control DMSO/91	30.62	34.96	0.807064	1.56982				Embryo 587								20181227 c1 phalloidin c2 pard6 c3 gata3.lif - test/69:0178-0120-0388:c:3/5 z:36/73 - test/69	43.15	35.31	0.723265	0.940096				191228 DMSO and U73122 7.5uM C1-Factin C2-GATA3 C3- DAPI BF C4-PARD6B.lif - u73122/635:0176-0330-0668:c:1/5 z:38/60 - u73122/635	38.46	104.78	1.06214	0.365106
180914 2 9 24h Par6.lif - 24h/17:0351-0190-0331:c:3/4 z:88/133 - 24h/17	37.6	85.93	1.84043	1.84162				20181227 c1 phalloidin c2 pard6 c3 gata3.lif - control DMSO/91:0168-0562-0347:c:3/5 z:34/73 - control DMSO/91	19.77	22.74						191228 DMSO and U73122 7.5uM C1-Factin C2-GATA3 C3- DAPI BF C4-PARD6B.lif - dmso/587:0126-0508-0761:c:1/5 z:31/61 - dmso/587	14.47	16.67	0.648297	1.30031	0.619518	1.08251		20181227 c1 phalloidin c2 pard6 c3 gata3.lif - test/69:0178-0189-0374:c:3/5 z:36/73 - test/69	18.22	28.37						191228 DMSO and U73122 7.5uM C1-Factin C2-GATA3 C3- DAPI BF C4-PARD6B.lif - u73122/635:0176-0422-0631:c:1/5 z:38/60 - u73122/635	11.55	100.51
180914 2 9 24h Par6.lif - 24h/17:0351-0192-0344:c:3/4 z:88/133 - 24h/17	25.55	30.76						20181227 c1 phalloidin c2 pard6 c3 gata3.lif - control DMSO/91:0168-0457-0357:c:3/5 z:34/73 - control DMSO/91	37.94	22.27						191228 DMSO and U73122 7.5uM C1-Factin C2-GATA3 C3- DAPI BF C4-PARD6B.lif - dmso/587:0126-0479-0694:c:1/5 z:31/61 - dmso/587	9.76	9.6						20181227 c1 phalloidin c2 pard6 c3 gata3.lif - test/69:0178-0270-0417:c:3/5 z:36/73 - test/69	59.66	37.56						191228 DMSO and U73122 7.5uM C1-Factin C2-GATA3 C3- DAPI BF C4-PARD6B.lif - u73122/635:0176-0436-0624:c:1/5 z:38/60 - u73122/635	36.21	50.74
180914 2 9 24h Par6.lif - 24h/17:0351-0223-0319:c:3/4 z:88/133 - 24h/17	20.43	46.66						20181227 c1 phalloidin c2 pard6 c3 gata3.lif - control DMSO/91:0168-0310-0196:c:3/5 z:34/73 - control DMSO/91	33.67	33.3	1.49048	1.65261				191228 DMSO and U73122 7.5uM C1-Factin C2-GATA3 C3- DAPI BF C4-PARD6B.lif - dmso/587:0126-0566-0669:c:1/5 z:31/61 - dmso/587	22.32	12.82						Embryo 68								191228 DMSO and U73122 7.5uM C1-Factin C2-GATA3 C3- DAPI BF C4-PARD6B.lif - u73122/635:0061-0468-0436:c:1/5 z:13/60 - u73122/635	40.81	53.41	1.51316	0.279404
180914 2 9 24h Par6.lif - 24h/17:0351-0314-0219:c:3/4 z:88/133 - 24h/17	40.59	57.52	2.71505	1.42871				20181227 c1 phalloidin c2 pard6 c3 gata3.lif - control DMSO/91:0168-0339-0224:c:3/5 z:34/73 - control DMSO/91	21.22	20.17						191228 DMSO and U73122 7.5uM C1-Factin C2-GATA3 C3- DAPI BF C4-PARD6B.lif - dmso/587:0126-0732-0657:c:1/5 z:31/61 - dmso/587	26.53	15.41	0.682707	1.00391				20181227 c1 phalloidin c2 pard6 c3 gata3.lif - test/68:0208-0194-0392:c:3/5 z:42/73 - test/68	66.68	37.27	1.21192	1.31976	1.37276	1.29298		191228 DMSO and U73122 7.5uM C1-Factin C2-GATA3 C3- DAPI BF C4-PARD6B.lif - u73122/635:0061-0462-0480:c:1/5 z:13/60 - u73122/635	33.61	42.69
180914 2 9 24h Par6.lif - 24h/17:0351-0306-0224:c:3/4 z:88/133 - 24h/17	21.15	29.35						20181227 c1 phalloidin c2 pard6 c3 gata3.lif - control DMSO/91:0168-0301-0263:c:3/5 z:34/73 - control DMSO/91	22.59	20.15						191228 DMSO and U73122 7.5uM C1-Factin C2-GATA3 C3- DAPI BF C4-PARD6B.lif - dmso/587:0126-0735-0653:c:1/5 z:31/61 - dmso/587	31.48	11.78						20181227 c1 phalloidin c2 pard6 c3 gata3.lif - test/68:0208-0233-0403:c:3/5 z:42/73 - test/68	44.96	33.24						191228 DMSO and U73122 7.5uM C1-Factin C2-GATA3 C3- DAPI BF C4-PARD6B.lif - u73122/635:0061-0503-0558:c:1/5 z:13/60 - u73122/635	26.97	24.8
180914 2 9 24h Par6.lif - 24h/17:0351-0282-0262:c:3/4 z:88/133 - 24h/17	14.95	40.26						apical		30.42		1.2081				191228 DMSO and U73122 7.5uM C1-Factin C2-GATA3 C3- DAPI BF C4-PARD6B.lif - dmso/587:0126-0685-0596:c:1/5 z:31/61 - dmso/587	38.86	15.35						20181227 c1 phalloidin c2 pard6 c3 gata3.lif - test/68:0208-0290-0389:c:3/5 z:42/73 - test/68	55.02	28.24						191228 DMSO and U73122 7.5uM C1-Factin C2-GATA3 C3- DAPI BF C4-PARD6B.lif - u73122/635:0071-0588-0641:c:1/5 z:15/60 - u73122/635	47.77		1.16229
180914 2 9 24h Par6.lif - 24h/17:0319-0276-0308:c:3/4 z:80/133 - 24h/17	70.89	62.51	2.66104	1.66383				cytoplasm		21.16						191228 DMSO and U73122 7.5uM C1-Factin C2-GATA3 C3- DAPI BF C4-PARD6B.lif - dmso/587:0126-0715-0464:c:1/5 z:31/61 - dmso/587	16.18	18.63	0.578064	1.02758				20181227 c1 phalloidin c2 pard6 c3 gata3.lif - test/68:0208-0342-0298:c:3/5 z:42/73 - test/68	78.29	41.8	2.85106	1.67066				191228 DMSO and U73122 7.5uM C1-Factin C2-GATA3 C3- DAPI BF C4-PARD6B.lif - u73122/635:0071-0561-0623:c:1/5 z:15/60 - u73122/635	29.97
180914 2 9 24h Par6.lif - 24h/17:0319-0268-0314:c:3/4 z:80/133 - 24h/17	30.21	35.43						basal		25.18						191228 DMSO and U73122 7.5uM C1-Factin C2-GATA3 C3- DAPI BF C4-PARD6B.lif - dmso/587:0126-0708-0469:c:1/5 z:31/61 - dmso/587	17.36	14.79						20181227 c1 phalloidin c2 pard6 c3 gata3.lif - test/68:0208-0348-0330:c:3/5 z:42/73 - test/68	41.57	33.04						191228 DMSO and U73122 7.5uM C1-Factin C2-GATA3 C3- DAPI BF C4-PARD6B.lif - u73122/635:0071-0528-0566:c:1/5 z:15/60 - u73122/635	41.1
180914 2 9 24h Par6.lif - 24h/17:0319-0274-0262:c:3/4 z:80/133 - 24h/17	26.64	37.57						apical		32.03		1.65787				191228 DMSO and U73122 7.5uM C1-Factin C2-GATA3 C3- DAPI BF C4-PARD6B.lif - dmso/587:0126-0618-0456:c:1/5 z:31/61 - dmso/587	27.99	18.13						20181227 c1 phalloidin c2 pard6 c3 gata3.lif - test/68:0208-0411-0436:c:3/5 z:42/73 - test/68	27.46	25.02						Embryo 634
180914 2 9 24h Par6.lif - 24h/17:0339-0277-0131:c:3/4 z:84/133 - 24h/17	39.33	58.2	1.91387	1.27492				cytoplasm		18.51						191228 DMSO and U73122 7.5uM C1-Factin C2-GATA3 C3- DAPI BF C4-PARD6B.lif - dmso/587:0126-0517-0359:c:1/5 z:31/61 - dmso/587	18.98	18.31	0.799158	1.15666				20181227 c1 phalloidin c2 pard6 c3 gata3.lif - test/68:0208-0504-0257:c:3/5 z:42/73 - test/68	54.21	23.99	1.13648	1.05916				191228 DMSO and U73122 7.5uM C1-Factin C2-GATA3 C3- DAPI BF C4-PARD6B.lif - u73122/634:0046-0650-0530:c:1/5 z:10/62 - u73122/634	70.24	75.93	1.35494	1.287	1.17231	1.08953
180914 2 9 24h Par6.lif - 24h/17:0339-0267-0136:c:3/4 z:84/133 - 24h/17	14.29	42.86						basal		19.32						191228 DMSO and U73122 7.5uM C1-Factin C2-GATA3 C3- DAPI BF C4-PARD6B.lif - dmso/587:0126-0528-0425:c:1/5 z:31/61 - dmso/587	16.79	14.75						20181227 c1 phalloidin c2 pard6 c3 gata3.lif - test/68:0208-0525-0259:c:3/5 z:42/73 - test/68	50.45	28.26						191228 DMSO and U73122 7.5uM C1-Factin C2-GATA3 C3- DAPI BF C4-PARD6B.lif - u73122/634:0046-0638-0535:c:1/5 z:10/62 - u73122/634	32.56	46.61
180914 2 9 24h Par6.lif - 24h/17:0339-0227-0162:c:3/4 z:84/133 - 24h/17	20.55	45.65						Embryo 141								191228 DMSO and U73122 7.5uM C1-Factin C2-GATA3 C3- DAPI BF C4-PARD6B.lif - dmso/587:0126-0510-0496:c:1/5 z:31/61 - dmso/587	23.75	15.83						20181227 c1 phalloidin c2 pard6 c3 gata3.lif - test/68:0208-0469-0322:c:3/5 z:42/73 - test/68	47.7	22.65						191228 DMSO and U73122 7.5uM C1-Factin C2-GATA3 C3- DAPI BF C4-PARD6B.lif - u73122/634:0046-0612-0608:c:1/5 z:10/62 - u73122/634	51.84	48.93
Embryo 16								190613 Media only DMSO inhibitor 5uM C1Factin C2Gata3 C3Pard6b C4 DAPI C5BF.lif - DMSO/141:0171-0259-0327:c:1/5 z:35/78 - DMSO/141	67.52		0.98555		1.31085			191228 DMSO and U73122 7.5uM C1-Factin C2-GATA3 C3- DAPI BF C4-PARD6B.lif - dmso/587:0126-0301-0593:c:1/5 z:31/61 - dmso/587	9.15	19.88	0.389362	1.22868				20181227 c1 phalloidin c2 pard6 c3 gata3.lif - test/68:0208-0644-0425:c:3/5 z:42/73 - test/68	37.57	38.23	0.540032	1.45972				191228 DMSO and U73122 7.5uM C1-Factin C2-GATA3 C3- DAPI BF C4-PARD6B.lif - u73122/634:0046-0584-0685:c:1/5 z:10/62 - u73122/634	52.39	78.22	1.16061	0.917832
180914 2 9 24h Par6.lif - 24h/16:0399-0089-0198:c:3/4 z:102/133 - 24h/16	60.98	117.76	2.03674	1.55192	2.60379	1.61642		190613 Media only DMSO inhibitor 5uM C1Factin C2Gata3 C3Pard6b C4 DAPI C5BF.lif - DMSO/141:0171-0266-0315:c:1/5 z:35/78 - DMSO/141	62.05							191228 DMSO and U73122 7.5uM C1-Factin C2-GATA3 C3- DAPI BF C4-PARD6B.lif - dmso/587:0126-0363-0593:c:1/5 z:31/61 - dmso/587	13.64	14.11						20181227 c1 phalloidin c2 pard6 c3 gata3.lif - test/68:0208-0602-0467:c:3/5 z:42/73 - test/68	31.03	35.74						191228 DMSO and U73122 7.5uM C1-Factin C2-GATA3 C3- DAPI BF C4-PARD6B.lif - u73122/634:0046-0573-0663:c:1/5 z:10/62 - u73122/634	23.69	68.66
180914 2 9 24h Par6.lif - 24h/16:0399-0109-0186:c:3/4 z:102/133 - 24h/16	13.35	69.71						190613 Media only DMSO inhibitor 5uM C1Factin C2Gata3 C3Pard6b C4 DAPI C5BF.lif - DMSO/141:0171-0400-0285:c:1/5 z:35/78 - DMSO/141	68.51							191228 DMSO and U73122 7.5uM C1-Factin C2-GATA3 C3- DAPI BF C4-PARD6B.lif - dmso/587:0126-0384-0520:c:1/5 z:31/61 - dmso/587	23.5	16.18						20181227 c1 phalloidin c2 pard6 c3 gata3.lif - test/68:0208-0578-0386:c:3/5 z:42/73 - test/68	69.57	26.19						191228 DMSO and U73122 7.5uM C1-Factin C2-GATA3 C3- DAPI BF C4-PARD6B.lif - u73122/634:0046-0524-0625:c:1/5 z:10/62 - u73122/634	45.14	37.88
180914 2 9 24h Par6.lif - 24h/16:0399-0126-0165:c:3/4 z:102/133 - 24h/16	29.94	75.88						190613 Media only DMSO inhibitor 5uM C1Factin C2Gata3 C3Pard6b C4 DAPI C5BF.lif - DMSO/141:0171-0183-0532:c:1/5 z:35/78 - DMSO/141	101.74		1.47642					apical		13.37		0.832503				20181227 c1 phalloidin c2 pard6 c3 gata3.lif - test/68:0208-0696-0582:c:3/5 z:42/73 - test/68	44.18	43.05	1.44191	1.0299				191228 DMSO and U73122 7.5uM C1-Factin C2-GATA3 C3- DAPI BF C4-PARD6B.lif - u73122/634:0066-0442-0545:c:1/5 z:14/62 - u73122/634	36.07	85.97	0.706978	0.997667
180914 2 9 24h Par6.lif - 24h/16:0399-0168-0147:c:3/4 z:102/133 - 24h/16	43.41	113.02	4.05322	1.86872				190613 Media only DMSO inhibitor 5uM C1Factin C2Gata3 C3Pard6b C4 DAPI C5BF.lif - DMSO/141:0171-0267-0538:c:1/5 z:35/78 - DMSO/141	63.51							cytoplasm		13.2						20181227 c1 phalloidin c2 pard6 c3 gata3.lif - test/68:0208-0665-0629:c:3/5 z:42/73 - test/68	9.4	39.74						191228 DMSO and U73122 7.5uM C1-Factin C2-GATA3 C3- DAPI BF C4-PARD6B.lif - u73122/634:0066-0455-0549:c:1/5 z:14/62 - u73122/634	29.03	21.89
180914 2 9 24h Par6.lif - 24h/16:0399-0173-0153:c:3/4 z:102/133 - 24h/16	6.14	66.33						190613 Media only DMSO inhibitor 5uM C1Factin C2Gata3 C3Pard6b C4 DAPI C5BF.lif - DMSO/141:0171-0319-0532:c:1/5 z:35/78 - DMSO/141	68.91							basal		16.06						20181227 c1 phalloidin c2 pard6 c3 gata3.lif - test/68:0208-0574-0614:c:3/5 z:42/73 - test/68	30.64	41.8						191228 DMSO and U73122 7.5uM C1-Factin C2-GATA3 C3- DAPI BF C4-PARD6B.lif - u73122/634:0066-0511-0568:c:1/5 z:14/62 - u73122/634	51.02	39.15
180914 2 9 24h Par6.lif - 24h/16:0399-0187-0213:c:3/4 z:102/133 - 24h/16	10.71	60.48						190613 Media only DMSO inhibitor 5uM C1Factin C2Gata3 C3Pard6b C4 DAPI C5BF.lif - DMSO/141:0171-0359-0729:c:1/5 z:35/78 - DMSO/141	65.31		0.922979					apical		14.37		1.0279				20181227 c1 phalloidin c2 pard6 c3 gata3.lif - test/68:0208-0526-0766:c:3/5 z:42/73 - test/68	34.99	35.5	1.26045	1.21867				191228 DMSO and U73122 7.5uM C1-Factin C2-GATA3 C3- DAPI BF C4-PARD6B.lif - u73122/634:0116-0396-0658:c:1/5 z:24/62 - u73122/634	34.27	101.96	1.66198	0.904557
180914 2 9 24h Par6.lif - 24h/16:0399-0226-0228:c:3/4 z:102/133 - 24h/16	87.43	83.28	2.65987	1.14521				190613 Media only DMSO inhibitor 5uM C1Factin C2Gata3 C3Pard6b C4 DAPI C5BF.lif - DMSO/141:0171-0365-0734:c:1/5 z:35/78 - DMSO/141	59.09							cytoplasm		13.28						20181227 c1 phalloidin c2 pard6 c3 gata3.lif - test/68:0208-0560-0759:c:3/5 z:42/73 - test/68	62.01	33.99						191228 DMSO and U73122 7.5uM C1-Factin C2-GATA3 C3- DAPI BF C4-PARD6B.lif - u73122/634:0116-0416-0662:c:1/5 z:24/62 - u73122/634	17.65	52.25
180914 2 9 24h Par6.lif - 24h/16:0399-0197-0236:c:3/4 z:102/133 - 24h/16	11.68	54.39						190613 Media only DMSO inhibitor 5uM C1Factin C2Gata3 C3Pard6b C4 DAPI C5BF.lif - DMSO/141:0171-0425-0688:c:1/5 z:35/78 - DMSO/141	70.76							basal		13.98						20181227 c1 phalloidin c2 pard6 c3 gata3.lif - test/68:0208-0500-0691:c:3/5 z:42/73 - test/68	27.76	29.13						191228 DMSO and U73122 7.5uM C1-Factin C2-GATA3 C3- DAPI BF C4-PARD6B.lif - u73122/634:0116-0500-0662:c:1/5 z:24/62 - u73122/634	20.62	45.26
180914 2 9 24h Par6.lif - 24h/16:0399-0165-0266:c:3/4 z:102/133 - 24h/16	32.87	72.72						190613 Media only DMSO inhibitor 5uM C1Factin C2Gata3 C3Pard6b C4 DAPI C5BF.lif - DMSO/141:0171-0657-0679:c:1/5 z:35/78 - DMSO/141	94.02		1.85847					Embryo 586								20181227 c1 phalloidin c2 pard6 c3 gata3.lif - test/68:0208-0297-0774:c:3/5 z:42/73 - test/68	41.58		1.17061					191228 DMSO and U73122 7.5uM C1-Factin C2-GATA3 C3- DAPI BF C4-PARD6B.lif - u73122/634:0116-0611-0701:c:1/5 z:24/62 - u73122/634	30.44	82.61	0.889278	1.34059
180914 2 9 24h Par6.lif - 24h/16:0399-0125-0271:c:3/4 z:102/133 - 24h/16	37.12	156.45	1.66532	1.89982				190613 Media only DMSO inhibitor 5uM C1Factin C2Gata3 C3Pard6b C4 DAPI C5BF.lif - DMSO/141:0171-0655-0663:c:1/5 z:35/78 - DMSO/141	41.1							191228 DMSO and U73122 7.5uM C1-Factin C2-GATA3 C3- DAPI BF C4-PARD6B.lif - dmso/586:0161-0475-0746:c:1/5 z:33/61 - dmso/586	37.75	15.67	0.676766	1.30366	0.826848	1.20484		20181227 c1 phalloidin c2 pard6 c3 gata3.lif - test/68:0208-0334-0756:c:3/5 z:42/73 - test/68	48							191228 DMSO and U73122 7.5uM C1-Factin C2-GATA3 C3- DAPI BF C4-PARD6B.lif - u73122/634:0116-0611-0683:c:1/5 z:24/62 - u73122/634	23.59	20.75
180914 2 9 24h Par6.lif - 24h/16:0399-0130-0241:c:3/4 z:102/133 - 24h/16	23.72	83.75						190613 Media only DMSO inhibitor 5uM C1Factin C2Gata3 C3Pard6b C4 DAPI C5BF.lif - DMSO/141:0171-0583-0592:c:1/5 z:35/78 - DMSO/141	50.59							191228 DMSO and U73122 7.5uM C1-Factin C2-GATA3 C3- DAPI BF C4-PARD6B.lif - dmso/586:0161-0471-0720:c:1/5 z:33/61 - dmso/586	16.87	8.85						20181227 c1 phalloidin c2 pard6 c3 gata3.lif - test/68:0208-0368-0694:c:3/5 z:42/73 - test/68	35.52							191228 DMSO and U73122 7.5uM C1-Factin C2-GATA3 C3- DAPI BF C4-PARD6B.lif - u73122/634:0116-0625-0606:c:1/5 z:24/62 - u73122/634	34.23	27.12
180914 2 9 24h Par6.lif - 24h/16:0399-0124-0227:c:3/4 z:102/133 - 24h/16	22.29	82.35						190613 Media only DMSO inhibitor 5uM C1Factin C2Gata3 C3Pard6b C4 DAPI C5BF.lif - DMSO/141:0096-0686-0294:c:1/5 z:20/78 - DMSO/141	149.48		1.4162					191228 DMSO and U73122 7.5uM C1-Factin C2-GATA3 C3- DAPI BF C4-PARD6B.lif - dmso/586:0161-0556-0563:c:1/5 z:33/61 - dmso/586	55.78	12.02						20181227 c1 phalloidin c2 pard6 c3 gata3.lif - test/68:0208-0129-0603:c:3/5 z:42/73 - test/68	36.98		1.36963					191228 DMSO and U73122 7.5uM C1-Factin C2-GATA3 C3- DAPI BF C4-PARD6B.lif - u73122/634:0151-0748-0455:c:1/5 z:31/62 - u73122/634	43.17		1.26007
Embryo 12								190613 Media only DMSO inhibitor 5uM C1Factin C2Gata3 C3Pard6b C4 DAPI C5BF.lif - DMSO/141:0096-0668-0315:c:1/5 z:20/78 - DMSO/141	31.91							191228 DMSO and U73122 7.5uM C1-Factin C2-GATA3 C3- DAPI BF C4-PARD6B.lif - dmso/586:0101-0495-0367:c:1/5 z:21/61 - dmso/586	53.55	5.01	0.595728	0.362781				20181227 c1 phalloidin c2 pard6 c3 gata3.lif - test/68:0208-0179-0621:c:3/5 z:42/73 - test/68	35.52							191228 DMSO and U73122 7.5uM C1-Factin C2-GATA3 C3- DAPI BF C4-PARD6B.lif - u73122/634:0151-0740-0448:c:1/5 z:31/62 - u73122/634	26.97
180914 2 9 24h Par6.lif - 24h/13:0315-0359-0264:c:3/4 z:77/133 - 24h/13	66.65	95.32	2.62092	1.46174	1.78871	2.27439		190613 Media only DMSO inhibitor 5uM C1Factin C2Gata3 C3Pard6b C4 DAPI C5BF.lif - DMSO/141:0096-0566-0407:c:1/5 z:20/78 - DMSO/141	105.55							191228 DMSO and U73122 7.5uM C1-Factin C2-GATA3 C3- DAPI BF C4-PARD6B.lif - dmso/586:0101-0514-0448:c:1/5 z:21/61 - dmso/586	26.55	12.1						20181227 c1 phalloidin c2 pard6 c3 gata3.lif - test/68:0208-0233-0588:c:3/5 z:42/73 - test/68	27							191228 DMSO and U73122 7.5uM C1-Factin C2-GATA3 C3- DAPI BF C4-PARD6B.lif - u73122/634:0151-0676-0480:c:1/5 z:31/62 - u73122/634	34.26
180914 2 9 24h Par6.lif - 24h/13:0315-0345-0268:c:3/4 z:77/133 - 24h/13	30.55	53.97						190613 Media only DMSO inhibitor 5uM C1Factin C2Gata3 C3Pard6b C4 DAPI C5BF.lif - DMSO/141:0156-0496-0177:c:1/5 z:32/78 - DMSO/141	99.87		1.64558					191228 DMSO and U73122 7.5uM C1-Factin C2-GATA3 C3- DAPI BF C4-PARD6B.lif - dmso/586:0101-0390-0439:c:1/5 z:21/61 - dmso/586	89.89	13.81						Embryo 105								Embryo 585
180914 2 9 24h Par6.lif - 24h/13:0315-0301-0295:c:3/4 z:77/133 - 24h/13	25.43	65.21						190613 Media only DMSO inhibitor 5uM C1Factin C2Gata3 C3Pard6b C4 DAPI C5BF.lif - DMSO/141:0156-0496-0229:c:1/5 z:32/78 - DMSO/141	61.44							191228 DMSO and U73122 7.5uM C1-Factin C2-GATA3 C3- DAPI BF C4-PARD6B.lif - dmso/586:0101-0282-0433:c:1/5 z:21/61 - dmso/586	51.13	18.76	0.662735	1.94808				190406 Ctrl DMSO Inhibitor C1 DAPI C2 BF C3 Factin C4 Gata3 C5 Pard6.lif - Inhibitor/105:0163-0423-0361:c:3/5 z:33/61 - Inhibitor/105	40.85	45.52	3.268	2.54871	2.14418	1.45711		191228 DMSO and U73122 7.5uM C1-Factin C2-GATA3 C3- DAPI BF C4-PARD6B.lif - u73122/585:0111-0320-0638:c:1/5 z:23/50 - u73122/585	41.26	71.56	1.16521	1.17354	1.12676	1.13713
180914 2 9 24h Par6.lif - 24h/13:0315-0294-0341:c:3/4 z:77/133 - 24h/13	44.53	90.33	1.82052	2.54522				190613 Media only DMSO inhibitor 5uM C1Factin C2Gata3 C3Pard6b C4 DAPI C5BF.lif - DMSO/141:0156-0472-0301:c:1/5 z:32/78 - DMSO/141	60.69							191228 DMSO and U73122 7.5uM C1-Factin C2-GATA3 C3- DAPI BF C4-PARD6B.lif - dmso/586:0101-0320-0511:c:1/5 z:21/61 - dmso/586	23.69	10.01						190406 Ctrl DMSO Inhibitor C1 DAPI C2 BF C3 Factin C4 Gata3 C5 Pard6.lif - Inhibitor/105:0163-0456-0370:c:3/5 z:33/61 - Inhibitor/105	19.02	28.28						191228 DMSO and U73122 7.5uM C1-Factin C2-GATA3 C3- DAPI BF C4-PARD6B.lif - u73122/585:0111-0355-0630:c:1/5 z:23/50 - u73122/585	49.17	40.06
180914 2 9 24h Par6.lif - 24h/13:0315-0305-0343:c:3/4 z:77/133 - 24h/13	30.87	47.02						Embryo 140								191228 DMSO and U73122 7.5uM C1-Factin C2-GATA3 C3- DAPI BF C4-PARD6B.lif - dmso/586:0101-0257-0552:c:1/5 z:21/61 - dmso/586	77.15	9.63						190406 Ctrl DMSO Inhibitor C1 DAPI C2 BF C3 Factin C4 Gata3 C5 Pard6.lif - Inhibitor/105:0163-0563-0333:c:3/5 z:33/61 - Inhibitor/105	12.5	17.86						191228 DMSO and U73122 7.5uM C1-Factin C2-GATA3 C3- DAPI BF C4-PARD6B.lif - u73122/585:0111-0392-0622:c:1/5 z:23/50 - u73122/585	35.41	62.86
180914 2 9 24h Par6.lif - 24h/13:0315-0296-0295:c:3/4 z:77/133 - 24h/13	24.46	35.49						190613 Media only DMSO inhibitor 5uM C1Factin C2Gata3 C3Pard6b C4 DAPI C5BF.lif - DMSO/140:0158-0264-0338:c:3/5 z:32/78 - DMSO/140	28.44	46.62	6.97059	1.58302	2.34705	1.76359		191228 DMSO and U73122 7.5uM C1-Factin C2-GATA3 C3- DAPI BF C4-PARD6B.lif - dmso/586:0186-0455-0307:c:1/5 z:40/61 - dmso/586	37.49		1.41632					190406 Ctrl DMSO Inhibitor C1 DAPI C2 BF C3 Factin C4 Gata3 C5 Pard6.lif - Inhibitor/105:0163-0614-0255:c:3/5 z:33/61 - Inhibitor/105	16.04	31.48	1.34451	1.26274				191228 DMSO and U73122 7.5uM C1-Factin C2-GATA3 C3- DAPI BF C4-PARD6B.lif - u73122/585:0111-0492-0787:c:1/5 z:23/50 - u73122/585	52.91	38.52	1.392	1.12637
180914 2 9 24h Par6.lif - 24h/13:0403-0174-0287:c:3/4 z:101/133 - 24h/13	48.11	77.52	2.31967	2.53665				190613 Media only DMSO inhibitor 5uM C1Factin C2Gata3 C3Pard6b C4 DAPI C5BF.lif - DMSO/140:0158-0274-0328:c:3/5 z:32/78 - DMSO/140	25.04	29.9						191228 DMSO and U73122 7.5uM C1-Factin C2-GATA3 C3- DAPI BF C4-PARD6B.lif - dmso/586:0186-0453-0340:c:1/5 z:40/61 - dmso/586	10.86							190406 Ctrl DMSO Inhibitor C1 DAPI C2 BF C3 Factin C4 Gata3 C5 Pard6.lif - Inhibitor/105:0163-0608-0253:c:3/5 z:33/61 - Inhibitor/105	15.94	28.18						191228 DMSO and U73122 7.5uM C1-Factin C2-GATA3 C3- DAPI BF C4-PARD6B.lif - u73122/585:0111-0509-0773:c:1/5 z:23/50 - u73122/585	38.51	29.16
180914 2 9 24h Par6.lif - 24h/13:0403-0182-0305:c:3/4 z:101/133 - 24h/13	26.1	45						190613 Media only DMSO inhibitor 5uM C1Factin C2Gata3 C3Pard6b C4 DAPI C5BF.lif - DMSO/140:0158-0285-0443:c:3/5 z:32/78 - DMSO/140	4.08	29.45						191228 DMSO and U73122 7.5uM C1-Factin C2-GATA3 C3- DAPI BF C4-PARD6B.lif - dmso/586:0186-0444-0441:c:1/5 z:40/61 - dmso/586	26.47							190406 Ctrl DMSO Inhibitor C1 DAPI C2 BF C3 Factin C4 Gata3 C5 Pard6.lif - Inhibitor/105:0163-0684-0357:c:3/5 z:33/61 - Inhibitor/105	11.93	24.93						191228 DMSO and U73122 7.5uM C1-Factin C2-GATA3 C3- DAPI BF C4-PARD6B.lif - u73122/585:0111-0491-0691:c:1/5 z:23/50 - u73122/585	38.01	22.23
180914 2 9 24h Par6.lif - 24h/13:0403-0223-0257:c:3/4 z:101/133 - 24h/13	20.74	30.56						190613 Media only DMSO inhibitor 5uM C1Factin C2Gata3 C3Pard6b C4 DAPI C5BF.lif - DMSO/140:0136-0599-0728:c:1/5 z:27/78 - DMSO/140	121.11	40.96	0.92394	1.51367				191228 DMSO and U73122 7.5uM C1-Factin C2-GATA3 C3- DAPI BF C4-PARD6B.lif - dmso/586:0186-0635-0482:c:1/5 z:40/61 - dmso/586	20.53		0.782692					190406 Ctrl DMSO Inhibitor C1 DAPI C2 BF C3 Factin C4 Gata3 C5 Pard6.lif - Inhibitor/105:0133-0799-0481:c:3/5 z:26/61 - Inhibitor/105	14.45	35.96	0.960771	1.34631				191228 DMSO and U73122 7.5uM C1-Factin C2-GATA3 C3- DAPI BF C4-PARD6B.lif - u73122/585:0111-0699-0640:c:1/5 z:23/50 - u73122/585	59.7	69.67	1.10781	1.29212
180914 2 9 24h Par6.lif - 24h/13:0403-0208-0166:c:3/4 z:101/133 - 24h/13	23.42	109.07	0.730278	2.91475				190613 Media only DMSO inhibitor 5uM C1Factin C2Gata3 C3Pard6b C4 DAPI C5BF.lif - DMSO/140:0136-0621-0748:c:1/5 z:27/78 - DMSO/140	116.48	45.83						191228 DMSO and U73122 7.5uM C1-Factin C2-GATA3 C3- DAPI BF C4-PARD6B.lif - dmso/586:0186-0619-0492:c:1/5 z:40/61 - dmso/586	13.21							190406 Ctrl DMSO Inhibitor C1 DAPI C2 BF C3 Factin C4 Gata3 C5 Pard6.lif - Inhibitor/105:0133-0783-0541:c:3/5 z:26/61 - Inhibitor/105	11.91	21.28						191228 DMSO and U73122 7.5uM C1-Factin C2-GATA3 C3- DAPI BF C4-PARD6B.lif - u73122/585:0111-0691-0639:c:1/5 z:23/50 - u73122/585	44.27	25.77
180914 2 9 24h Par6.lif - 24h/13:0403-0186-0188:c:3/4 z:101/133 - 24h/13	18.26	38.29						190613 Media only DMSO inhibitor 5uM C1Factin C2Gata3 C3Pard6b C4 DAPI C5BF.lif - DMSO/140:0136-0606-0565:c:1/5 z:27/78 - DMSO/140	131.08	27.06						191228 DMSO and U73122 7.5uM C1-Factin C2-GATA3 C3- DAPI BF C4-PARD6B.lif - dmso/586:0186-0557-0534:c:1/5 z:40/61 - dmso/586	26.23							190406 Ctrl DMSO Inhibitor C1 DAPI C2 BF C3 Factin C4 Gata3 C5 Pard6.lif - Inhibitor/105:0133-0735-0438:c:3/5 z:26/61 - Inhibitor/105	15.04	26.71						191228 DMSO and U73122 7.5uM C1-Factin C2-GATA3 C3- DAPI BF C4-PARD6B.lif - u73122/585:0111-0658-0593:c:1/5 z:23/50 - u73122/585	53.89	27.58
180914 2 9 24h Par6.lif - 24h/13:0403-0240-0208:c:3/4 z:101/133 - 24h/13	32.07	37.42						190613 Media only DMSO inhibitor 5uM C1Factin C2Gata3 C3Pard6b C4 DAPI C5BF.lif - DMSO/140:0136-0584-0308:c:1/5 z:27/78 - DMSO/140	101.89	50.77	0.677055	2.2151				Embryo 582								190406 Ctrl DMSO Inhibitor C1 DAPI C2 BF C3 Factin C4 Gata3 C5 Pard6.lif - Inhibitor/105:0133-0745-0330:c:3/5 z:26/61 - Inhibitor/105	39.34	25.88	2.445	0.653205				191228 DMSO and U73122 7.5uM C1-Factin C2-GATA3 C3- DAPI BF C4-PARD6B.lif - u73122/585:0126-0708-0475:c:1/5 z:27/50 - u73122/585	44.63	49.74	1.05834	0.925013
180914 2 9 24h Par6.lif - 24h/13:0403-0386-0203:c:3/4 z:101/133 - 24h/13	36.29	89.67	1.45218	1.91357				190613 Media only DMSO inhibitor 5uM C1Factin C2Gata3 C3Pard6b C4 DAPI C5BF.lif - DMSO/140:0136-0540-0326:c:1/5 z:27/78 - DMSO/140	98.75	35.39						191228 DMSO and U73122 7.5uM C1-Factin C2-GATA3 C3- DAPI BF C4-PARD6B.lif - dmso/582:0186-0685-0509:c:1/5 z:38/75 - dmso/582	69.84	16.82	0.793366	0.926722	1.22243	0.790369		190406 Ctrl DMSO Inhibitor C1 DAPI C2 BF C3 Factin C4 Gata3 C5 Pard6.lif - Inhibitor/105:0133-0731-0432:c:3/5 z:26/61 - Inhibitor/105	20.71	21.79						191228 DMSO and U73122 7.5uM C1-Factin C2-GATA3 C3- DAPI BF C4-PARD6B.lif - u73122/585:0126-0703-0477:c:1/5 z:27/50 - u73122/585	34.59	27.08
180914 2 9 24h Par6.lif - 24h/13:0403-0412-0240:c:3/4 z:101/133 - 24h/13	17.55	61.46						190613 Media only DMSO inhibitor 5uM C1Factin C2Gata3 C3Pard6b C4 DAPI C5BF.lif - DMSO/140:0136-0563-0544:c:1/5 z:27/78 - DMSO/140	150.49	22.92						191228 DMSO and U73122 7.5uM C1-Factin C2-GATA3 C3- DAPI BF C4-PARD6B.lif - dmso/582:0186-0678-0488:c:1/5 z:38/75 - dmso/582	21.12	13.68						190406 Ctrl DMSO Inhibitor C1 DAPI C2 BF C3 Factin C4 Gata3 C5 Pard6.lif - Inhibitor/105:0133-0676-0344:c:3/5 z:26/61 - Inhibitor/105	16.09	39.62						191228 DMSO and U73122 7.5uM C1-Factin C2-GATA3 C3- DAPI BF C4-PARD6B.lif - u73122/585:0126-0690-0498:c:1/5 z:27/50 - u73122/585	42.17	20.79
180914 2 9 24h Par6.lif - 24h/13:0403-0388-0265:c:3/4 z:101/133 - 24h/13	24.99	46.86						190613 Media only DMSO inhibitor 5uM C1Factin C2Gata3 C3Pard6b C4 DAPI C5BF.lif - DMSO/140:0221-0253-0569:c:1/5 z:39/78 - DMSO/140	40.92	49.35	0.816603	1.74258				191228 DMSO and U73122 7.5uM C1-Factin C2-GATA3 C3- DAPI BF C4-PARD6B.lif - dmso/582:0186-0592-0602:c:1/5 z:38/75 - dmso/582	88.03	18.15						190406 Ctrl DMSO Inhibitor C1 DAPI C2 BF C3 Factin C4 Gata3 C5 Pard6.lif - Inhibitor/105:0133-0604-0722:c:3/5 z:26/61 - Inhibitor/105	27.1	41.51	1.69906	1.4746				191228 DMSO and U73122 7.5uM C1-Factin C2-GATA3 C3- DAPI BF C4-PARD6B.lif - u73122/585:0126-0480-0308:c:1/5 z:27/50 - u73122/585	34.94	29	1.24652	1.24821
Embryo 11								190613 Media only DMSO inhibitor 5uM C1Factin C2Gata3 C3Pard6b C4 DAPI C5BF.lif - DMSO/140:0221-0281-0550:c:1/5 z:39/78 - DMSO/140	46.07	32.34						191228 DMSO and U73122 7.5uM C1-Factin C2-GATA3 C3- DAPI BF C4-PARD6B.lif - dmso/582:0186-0511-0774:c:1/5 z:38/75 - dmso/582	54.14	14.89	1.93012	0.712781				190406 Ctrl DMSO Inhibitor C1 DAPI C2 BF C3 Factin C4 Gata3 C5 Pard6.lif - Inhibitor/105:0133-0605-0743:c:3/5 z:26/61 - Inhibitor/105	21.63	28.15						191228 DMSO and U73122 7.5uM C1-Factin C2-GATA3 C3- DAPI BF C4-PARD6B.lif - u73122/585:0126-0484-0332:c:1/5 z:27/50 - u73122/585	37.03	16.94
180914 2 9 24h Par6.lif - 24h/11:0419-0243-0361:c:3/4 z:105/133 - 24h/11	36.18	28.73	1.10676	1.16646	1.22943	0.95451		190613 Media only DMSO inhibitor 5uM C1Factin C2Gata3 C3Pard6b C4 DAPI C5BF.lif - DMSO/140:0221-0426-0605:c:1/5 z:39/78 - DMSO/140	50.11	28.32						191228 DMSO and U73122 7.5uM C1-Factin C2-GATA3 C3- DAPI BF C4-PARD6B.lif - dmso/582:0186-0482-0708:c:1/5 z:38/75 - dmso/582	16.39	15.03						190406 Ctrl DMSO Inhibitor C1 DAPI C2 BF C3 Factin C4 Gata3 C5 Pard6.lif - Inhibitor/105:0133-0586-0645:c:3/5 z:26/61 - Inhibitor/105	15.95	28.15						191228 DMSO and U73122 7.5uM C1-Factin C2-GATA3 C3- DAPI BF C4-PARD6B.lif - u73122/585:0126-0496-0389:c:1/5 z:27/50 - u73122/585	28.03	16.89
180914 2 9 24h Par6.lif - 24h/11:0419-0241-0345:c:3/4 z:105/133 - 24h/11	17.27	26.32						Embryo 139								191228 DMSO and U73122 7.5uM C1-Factin C2-GATA3 C3- DAPI BF C4-PARD6B.lif - dmso/582:0186-0454-0623:c:1/5 z:38/75 - dmso/582	28.05	20.89						190406 Ctrl DMSO Inhibitor C1 DAPI C2 BF C3 Factin C4 Gata3 C5 Pard6.lif - Inhibitor/105:0088-0554-0662:c:3/5 z:18/61 - Inhibitor/105	61.79		3.14773					191228 DMSO and U73122 7.5uM C1-Factin C2-GATA3 C3- DAPI BF C4-PARD6B.lif - u73122/585:0126-0309-0393:c:1/5 z:27/50 - u73122/585	28.41	49.61	0.790704	1.05753
180914 2 9 24h Par6.lif - 24h/11:0419-0308-0317:c:3/4 z:105/133 - 24h/11	32.69	24.63						190613 Media only DMSO inhibitor 5uM C1Factin C2Gata3 C3Pard6b C4 DAPI C5BF.lif - DMSO/139:0171-0466-0801:c:1/5 z:35/78 - DMSO/139	99.49	72.77	2.19141	1.79679	1.54718	1.58042		191228 DMSO and U73122 7.5uM C1-Factin C2-GATA3 C3- DAPI BF C4-PARD6B.lif - dmso/582:0151-0399-0515:c:1/5 z:28/75 - dmso/582	45.84	13.82	0.943792	0.731604				190406 Ctrl DMSO Inhibitor C1 DAPI C2 BF C3 Factin C4 Gata3 C5 Pard6.lif - Inhibitor/105:0088-0571-0609:c:3/5 z:18/61 - Inhibitor/105	28.1							191228 DMSO and U73122 7.5uM C1-Factin C2-GATA3 C3- DAPI BF C4-PARD6B.lif - u73122/585:0126-0332-0400:c:1/5 z:27/50 - u73122/585	39.7	27.51
180914 2 9 24h Par6.lif - 24h/11:0419-0354-0301:c:3/4 z:105/133 - 24h/11	24.05	30.17	0.74114	0.726988				190613 Media only DMSO inhibitor 5uM C1Factin C2Gata3 C3Pard6b C4 DAPI C5BF.lif - DMSO/139:0171-0441-0773:c:1/5 z:35/78 - DMSO/139	62.93	61.61						191228 DMSO and U73122 7.5uM C1-Factin C2-GATA3 C3- DAPI BF C4-PARD6B.lif - dmso/582:0151-0404-0483:c:1/5 z:28/75 - dmso/582	39.16	13.94						190406 Ctrl DMSO Inhibitor C1 DAPI C2 BF C3 Factin C4 Gata3 C5 Pard6.lif - Inhibitor/105:0088-0527-0528:c:3/5 z:18/61 - Inhibitor/105	19.63							191228 DMSO and U73122 7.5uM C1-Factin C2-GATA3 C3- DAPI BF C4-PARD6B.lif - u73122/585:0126-0368-0427:c:1/5 z:27/50 - u73122/585	35.93	19.26
180914 2 9 24h Par6.lif - 24h/11:0419-0359-0265:c:3/4 z:105/133 - 24h/11	13.06	57.94						190613 Media only DMSO inhibitor 5uM C1Factin C2Gata3 C3Pard6b C4 DAPI C5BF.lif - DMSO/139:0171-0502-0697:c:1/5 z:35/78 - DMSO/139	45.4	40.5						191228 DMSO and U73122 7.5uM C1-Factin C2-GATA3 C3- DAPI BF C4-PARD6B.lif - dmso/582:0151-0456-0625:c:1/5 z:28/75 - dmso/582	48.57	18.89						Embryo 104								Embryo 580
180914 2 9 24h Par6.lif - 24h/11:0419-0304-0270:c:3/4 z:105/133 - 24h/11	32.45	41.5						190613 Media only DMSO inhibitor 5uM C1Factin C2Gata3 C3Pard6b C4 DAPI C5BF.lif - DMSO/139:0171-0653-0614:c:1/5 z:35/78 - DMSO/139	48.35	39.96	0.985528	1.18822				Embryo 220								190406 Ctrl DMSO Inhibitor C1 DAPI C2 BF C3 Factin C4 Gata3 C5 Pard6.lif - Inhibitor/104:0163-0354-0488:c:3/5 z:33/61 - Inhibitor/104	64.75	46.46	5.84386	1.66942	1.99946	1.5975		191228 DMSO and U73122 7.5uM C1-Factin C2-GATA3 C3- DAPI BF C4-PARD6B.lif - u73122/580:0116-0321-0560:c:1/5 z:24/56 - u73122/580	73.58	54.11	2.3204	1.84648	2.05822	1.65356
180914 2 9 24h Par6.lif - 24h/11:0419-0346-0159:c:3/4 z:105/133 - 24h/11	39.77	39.23	1.74813	0.970079				190613 Media only DMSO inhibitor 5uM C1Factin C2Gata3 C3Pard6b C4 DAPI C5BF.lif - DMSO/139:0171-0624-0651:c:1/5 z:35/78 - DMSO/139	44.82	36.04						220120 C1-PARD6B C2-GATA3 C3-DAPI BF C4-FACTIN 7.5uM U73122 treatment DMSO media ctrl.lif - DMSO/220:0120-0395-0525:c:5/5 z:24/85 - DMSO/220	101.43	78.72	1.74368	1.02701	1.30548	1.49843		190406 Ctrl DMSO Inhibitor C1 DAPI C2 BF C3 Factin C4 Gata3 C5 Pard6.lif - Inhibitor/104:0163-0404-0441:c:3/5 z:33/61 - Inhibitor/104	7.2	19.6						191228 DMSO and U73122 7.5uM C1-Factin C2-GATA3 C3- DAPI BF C4-PARD6B.lif - u73122/580:0116-0356-0560:c:1/5 z:24/56 - u73122/580	36.28	52.34
180914 2 9 24h Par6.lif - 24h/11:0419-0314-0164:c:3/4 z:105/133 - 24h/11	21.1	45.23						190613 Media only DMSO inhibitor 5uM C1Factin C2Gata3 C3Pard6b C4 DAPI C5BF.lif - DMSO/139:0171-0497-0702:c:1/5 z:35/78 - DMSO/139	49.06	33.63						220120 C1-PARD6B C2-GATA3 C3-DAPI BF C4-FACTIN 7.5uM U73122 treatment DMSO media ctrl.lif - DMSO/220:0120-0406-0517:c:5/5 z:24/85 - DMSO/220	32.69	48.36						190406 Ctrl DMSO Inhibitor C1 DAPI C2 BF C3 Factin C4 Gata3 C5 Pard6.lif - Inhibitor/104:0163-0446-0475:c:3/5 z:33/61 - Inhibitor/104	11.08	27.83						191228 DMSO and U73122 7.5uM C1-Factin C2-GATA3 C3- DAPI BF C4-PARD6B.lif - u73122/580:0116-0395-0584:c:1/5 z:24/56 - u73122/580	31.71	27.16
180914 2 9 24h Par6.lif - 24h/11:0419-0286-0204:c:3/4 z:105/133 - 24h/11	22.75	40.44						190613 Media only DMSO inhibitor 5uM C1Factin C2Gata3 C3Pard6b C4 DAPI C5BF.lif - DMSO/139:0171-0233-0549:c:1/5 z:35/78 - DMSO/139	45.93	79.2	1.4646	2.09746				220120 C1-PARD6B C2-GATA3 C3-DAPI BF C4-FACTIN 7.5uM U73122 treatment DMSO media ctrl.lif - DMSO/220:0120-0418-0590:c:5/5 z:24/85 - DMSO/220	58.17	76.65						190406 Ctrl DMSO Inhibitor C1 DAPI C2 BF C3 Factin C4 Gata3 C5 Pard6.lif - Inhibitor/104:0183-0399-0631:c:3/5 z:37/61 - Inhibitor/104	16.96	41.95	1.68756	1.59384				191228 DMSO and U73122 7.5uM C1-Factin C2-GATA3 C3- DAPI BF C4-PARD6B.lif - u73122/580:0116-0379-0665:c:1/5 z:24/56 - u73122/580	61.33	29.21	2.34981	1.5762
180914 2 9 24h Par6.lif - 24h/11:0495-0145-0182:c:3/4 z:124/133 - 24h/11	39.77	32.35	1.3217	#DIV/0!				190613 Media only DMSO inhibitor 5uM C1Factin C2Gata3 C3Pard6b C4 DAPI C5BF.lif - DMSO/139:0171-0247-0546:c:1/5 z:35/78 - DMSO/139	42.07	64.33						220120 C1-PARD6B C2-GATA3 C3-DAPI BF C4-FACTIN 7.5uM U73122 treatment DMSO media ctrl.lif - DMSO/220:0120-0473-0500:c:5/5 z:24/85 - DMSO/220	87.28	35.06	1.18346	0.446966				190406 Ctrl DMSO Inhibitor C1 DAPI C2 BF C3 Factin C4 Gata3 C5 Pard6.lif - Inhibitor/104:0183-0382-0590:c:3/5 z:37/61 - Inhibitor/104	6.1	34.2						191228 DMSO and U73122 7.5uM C1-Factin C2-GATA3 C3- DAPI BF C4-PARD6B.lif - u73122/580:0116-0444-0631:c:1/5 z:24/56 - u73122/580	29.65	25.24
180914 2 9 24h Par6.lif - 24h/11:0495-0162-0223:c:3/4 z:124/133 - 24h/11	11.63							190613 Media only DMSO inhibitor 5uM C1Factin C2Gata3 C3Pard6b C4 DAPI C5BF.lif - DMSO/139:0171-0390-0490:c:1/5 z:35/78 - DMSO/139	31.36	37.76						220120 C1-PARD6B C2-GATA3 C3-DAPI BF C4-FACTIN 7.5uM U73122 treatment DMSO media ctrl.lif - DMSO/220:0120-0510-0482:c:5/5 z:24/85 - DMSO/220	48.3	53.88						190406 Ctrl DMSO Inhibitor C1 DAPI C2 BF C3 Factin C4 Gata3 C5 Pard6.lif - Inhibitor/104:0183-0455-0597:c:3/5 z:37/61 - Inhibitor/104	10.05	26.32						191228 DMSO and U73122 7.5uM C1-Factin C2-GATA3 C3- DAPI BF C4-PARD6B.lif - u73122/580:0116-0506-0631:c:1/5 z:24/56 - u73122/580	26.1	24.5
180914 2 9 24h Par6.lif - 24h/11:0495-0192-0146:c:3/4 z:124/133 - 24h/11	30.09							apical		27.3		1.23922				220120 C1-PARD6B C2-GATA3 C3-DAPI BF C4-FACTIN 7.5uM U73122 treatment DMSO media ctrl.lif - DMSO/220:0120-0532-0524:c:5/5 z:24/85 - DMSO/220	73.75	78.44						190406 Ctrl DMSO Inhibitor C1 DAPI C2 BF C3 Factin C4 Gata3 C5 Pard6.lif - Inhibitor/104:0183-0569-0781:c:3/5 z:37/61 - Inhibitor/104	16.21	30.71	1.47364	1.45683				191228 DMSO and U73122 7.5uM C1-Factin C2-GATA3 C3- DAPI BF C4-PARD6B.lif - u73122/580:0116-0464-0354:c:1/5 z:24/56 - u73122/580	53.98	13.58	2.64219	1.57237
Embryo 8								cytoplasm		17.91						220120 C1-PARD6B C2-GATA3 C3-DAPI BF C4-FACTIN 7.5uM U73122 treatment DMSO media ctrl.lif - DMSO/220:0170-0617-0415:c:5/5 z:34/85 - DMSO/220	61.18	118.46	1.11887	1.87764				190406 Ctrl DMSO Inhibitor C1 DAPI C2 BF C3 Factin C4 Gata3 C5 Pard6.lif - Inhibitor/104:0183-0597-0796:c:3/5 z:37/61 - Inhibitor/104	9.46	16.44						191228 DMSO and U73122 7.5uM C1-Factin C2-GATA3 C3- DAPI BF C4-PARD6B.lif - u73122/580:0116-0419-0363:c:1/5 z:24/56 - u73122/580	40.4	20.56
180914 2 9 24h Par6.lif - 24h/8:0423-0173-0232:c:3/4 z:106/133 - 24h/8	62.61	74.49	3.50953	2.16226	2.96115	1.13431		basal		22.03						220120 C1-PARD6B C2-GATA3 C3-DAPI BF C4-FACTIN 7.5uM U73122 treatment DMSO media ctrl.lif - DMSO/220:0170-0609-0426:c:5/5 z:34/85 - DMSO/220	54.38	40.86						190406 Ctrl DMSO Inhibitor C1 DAPI C2 BF C3 Factin C4 Gata3 C5 Pard6.lif - Inhibitor/104:0183-0630-0737:c:3/5 z:37/61 - Inhibitor/104	11	21.08						191228 DMSO and U73122 7.5uM C1-Factin C2-GATA3 C3- DAPI BF C4-PARD6B.lif - u73122/580:0116-0390-0427:c:1/5 z:24/56 - u73122/580	20.43	30.4
180914 2 9 24h Par6.lif - 24h/8:0423-0187-0228:c:3/4 z:106/133 - 24h/8	26.36	41.56						Embryo 138								220120 C1-PARD6B C2-GATA3 C3-DAPI BF C4-FACTIN 7.5uM U73122 treatment DMSO media ctrl.lif - DMSO/220:0170-0604-0470:c:5/5 z:34/85 - DMSO/220	54.68	63.09						190406 Ctrl DMSO Inhibitor C1 DAPI C2 BF C3 Factin C4 Gata3 C5 Pard6.lif - Inhibitor/104:0153-0717-0756:c:3/5 z:31/61 - Inhibitor/104	19.4	37.51	1.32243	1.07386				191228 DMSO and U73122 7.5uM C1-Factin C2-GATA3 C3- DAPI BF C4-PARD6B.lif - u73122/580:0116-0652-0335:c:1/5 z:24/56 - u73122/580	48.69	40.88	1.88356	1.22709
180914 2 9 24h Par6.lif - 24h/8:0423-0204-0184:c:3/4 z:106/133 - 24h/8	17.84	34.45						190613 Media only DMSO inhibitor 5uM C1Factin C2Gata3 C3Pard6b C4 DAPI C5BF.lif - DMSO/138:0181-0658-0381:c:1/5 z:33/78 - DMSO/138	54.48	54.29	2.43758	1.36236	1.73086	1.07044		220120 C1-PARD6B C2-GATA3 C3-DAPI BF C4-FACTIN 7.5uM U73122 treatment DMSO media ctrl.lif - DMSO/220:0145-0746-0499:c:5/5 z:28/85 - DMSO/220	73.29	62.25	0.879515	1.41961				190406 Ctrl DMSO Inhibitor C1 DAPI C2 BF C3 Factin C4 Gata3 C5 Pard6.lif - Inhibitor/104:0153-0730-0722:c:3/5 z:31/61 - Inhibitor/104	9.55	24.04						191228 DMSO and U73122 7.5uM C1-Factin C2-GATA3 C3- DAPI BF C4-PARD6B.lif - u73122/580:0116-0649-0338:c:1/5 z:24/56 - u73122/580	28.09	31.73
180914 2 9 24h Par6.lif - 24h/8:0423-0225-0335:c:3/4 z:106/133 - 24h/8	60.82	38.5	4.93268	0.796936				190613 Media only DMSO inhibitor 5uM C1Factin C2Gata3 C3Pard6b C4 DAPI C5BF.lif - DMSO/138:0181-0653-0423:c:1/5 z:33/78 - DMSO/138	24.24	44.88						220120 C1-PARD6B C2-GATA3 C3-DAPI BF C4-FACTIN 7.5uM U73122 treatment DMSO media ctrl.lif - DMSO/220:0145-0746-0511:c:5/5 z:28/85 - DMSO/220	49	34.23						190406 Ctrl DMSO Inhibitor C1 DAPI C2 BF C3 Factin C4 Gata3 C5 Pard6.lif - Inhibitor/104:0153-0770-0668:c:3/5 z:31/61 - Inhibitor/104	14.67	34.93						191228 DMSO and U73122 7.5uM C1-Factin C2-GATA3 C3- DAPI BF C4-PARD6B.lif - u73122/580:0116-0566-0354:c:1/5 z:24/56 - u73122/580	25.85	9.83
180914 2 9 24h Par6.lif - 24h/8:0423-0225-0324:c:3/4 z:106/133 - 24h/8	27.48	44.48						190613 Media only DMSO inhibitor 5uM C1Factin C2Gata3 C3Pard6b C4 DAPI C5BF.lif - DMSO/138:0181-0691-0472:c:1/5 z:33/78 - DMSO/138	22.35	39.85						220120 C1-PARD6B C2-GATA3 C3-DAPI BF C4-FACTIN 7.5uM U73122 treatment DMSO media ctrl.lif - DMSO/220:0145-0715-0510:c:5/5 z:28/85 - DMSO/220	83.33	43.85						190406 Ctrl DMSO Inhibitor C1 DAPI C2 BF C3 Factin C4 Gata3 C5 Pard6.lif - Inhibitor/104:0153-0872-0649:c:3/5 z:31/61 - Inhibitor/104	17.64	43.54	1.24488	1.68498				191228 DMSO and U73122 7.5uM C1-Factin C2-GATA3 C3- DAPI BF C4-PARD6B.lif - u73122/580:0116-0782-0450:c:1/5 z:24/56 - u73122/580	54.95	39.72	1.6325	1.46089
180914 2 9 24h Par6.lif - 24h/8:0423-0280-0342:c:3/4 z:106/133 - 24h/8	12.33	48.31						190613 Media only DMSO inhibitor 5uM C1Factin C2Gata3 C3Pard6b C4 DAPI C5BF.lif - DMSO/138:0181-0582-0558:c:1/5 z:33/78 - DMSO/138	38.79	66.59	1.18334	0.959095				220120 C1-PARD6B C2-GATA3 C3-DAPI BF C4-FACTIN 7.5uM U73122 treatment DMSO media ctrl.lif - DMSO/220:0145-0740-0648:c:5/5 z:28/85 - DMSO/220	88.8	63.81	1.56338	1.44891				190406 Ctrl DMSO Inhibitor C1 DAPI C2 BF C3 Factin C4 Gata3 C5 Pard6.lif - Inhibitor/104:0153-0870-0660:c:3/5 z:31/61 - Inhibitor/104	10.41	26.5						191228 DMSO and U73122 7.5uM C1-Factin C2-GATA3 C3- DAPI BF C4-PARD6B.lif - u73122/580:0116-0747-0453:c:1/5 z:24/56 - u73122/580	37.14	14.85
180914 2 9 24h Par6.lif - 24h/8:0423-0324-0374:c:3/4 z:106/133 - 24h/8	37.91	19.62	2.01649	0.53214				190613 Media only DMSO inhibitor 5uM C1Factin C2Gata3 C3Pard6b C4 DAPI C5BF.lif - DMSO/138:0181-0690-0567:c:1/5 z:33/78 - DMSO/138	20.13	66.43						220120 C1-PARD6B C2-GATA3 C3-DAPI BF C4-FACTIN 7.5uM U73122 treatment DMSO media ctrl.lif - DMSO/220:0145-0679-0632:c:5/5 z:28/85 - DMSO/220	59.15	36.23						190406 Ctrl DMSO Inhibitor C1 DAPI C2 BF C3 Factin C4 Gata3 C5 Pard6.lif - Inhibitor/104:0153-0888-0521:c:3/5 z:31/61 - Inhibitor/104	14.17	25.84						191228 DMSO and U73122 7.5uM C1-Factin C2-GATA3 C3- DAPI BF C4-PARD6B.lif - u73122/580:0116-0723-0485:c:1/5 z:24/56 - u73122/580	33.66	17.12
180914 2 9 24h Par6.lif - 24h/8:0423-0338-0361:c:3/4 z:106/133 - 24h/8	22.92	27.13						190613 Media only DMSO inhibitor 5uM C1Factin C2Gata3 C3Pard6b C4 DAPI C5BF.lif - DMSO/138:0181-0706-0475:c:1/5 z:33/78 - DMSO/138	32.78	69.43						220120 C1-PARD6B C2-GATA3 C3-DAPI BF C4-FACTIN 7.5uM U73122 treatment DMSO media ctrl.lif - DMSO/220:0145-0667-0673:c:5/5 z:28/85 - DMSO/220	56.8	44.04						190406 Ctrl DMSO Inhibitor C1 DAPI C2 BF C3 Factin C4 Gata3 C5 Pard6.lif - Inhibitor/104:0153-0814-0387:c:3/5 z:31/61 - Inhibitor/104	17.31	40.58	1.52511	1.87957				191228 DMSO and U73122 7.5uM C1-Factin C2-GATA3 C3- DAPI BF C4-PARD6B.lif - u73122/580:0116-0820-0588:c:1/5 z:24/56 - u73122/580	73.42	13.5	1.80927	2.23833
180914 2 9 24h Par6.lif - 24h/8:0423-0355-0338:c:3/4 z:106/133 - 24h/8	18.8	36.87						190613 Media only DMSO inhibitor 5uM C1Factin C2Gata3 C3Pard6b C4 DAPI C5BF.lif - DMSO/138:0171-0813-0645:c:1/5 z:33/78 - DMSO/138	68.1	58.6	1.57166	0.926629				220120 C1-PARD6B C2-GATA3 C3-DAPI BF C4-FACTIN 7.5uM U73122 treatment DMSO media ctrl.lif - DMSO/220:0145-0623-0743:c:5/5 z:28/85 - DMSO/220	96.02	81.23	1.89127	2.77046				190406 Ctrl DMSO Inhibitor C1 DAPI C2 BF C3 Factin C4 Gata3 C5 Pard6.lif - Inhibitor/104:0153-0801-0401:c:3/5 z:31/61 - Inhibitor/104	9.22	22.96						191228 DMSO and U73122 7.5uM C1-Factin C2-GATA3 C3- DAPI BF C4-PARD6B.lif - u73122/580:0116-0778-0583:c:1/5 z:24/56 - u73122/580	28.66	12.56
180914 2 9 24h Par6.lif - 24h/8:0423-0393-0342:c:3/4 z:106/133 - 24h/8	52.03	48	2.76021	1.4218				190613 Media only DMSO inhibitor 5uM C1Factin C2Gata3 C3Pard6b C4 DAPI C5BF.lif - DMSO/138:0171-0817-0703:c:1/5 z:33/78 - DMSO/138	48.84	76.99						220120 C1-PARD6B C2-GATA3 C3-DAPI BF C4-FACTIN 7.5uM U73122 treatment DMSO media ctrl.lif - DMSO/220:0145-0623-0711:c:5/5 z:28/85 - DMSO/220	55.97	27.39						190406 Ctrl DMSO Inhibitor C1 DAPI C2 BF C3 Factin C4 Gata3 C5 Pard6.lif - Inhibitor/104:0153-0728-0331:c:3/5 z:31/61 - Inhibitor/104	11.35	21.59						191228 DMSO and U73122 7.5uM C1-Factin C2-GATA3 C3- DAPI BF C4-PARD6B.lif - u73122/580:0116-0752-0518:c:1/5 z:24/56 - u73122/580	40.58	14.24
180914 2 9 24h Par6.lif - 24h/8:0423-0380-0324:c:3/4 z:106/133 - 24h/8	12.79	33.07						190613 Media only DMSO inhibitor 5uM C1Factin C2Gata3 C3Pard6b C4 DAPI C5BF.lif - DMSO/138:0171-0775-0605:c:1/5 z:33/78 - DMSO/138	43.33	63.24						220120 C1-PARD6B C2-GATA3 C3-DAPI BF C4-FACTIN 7.5uM U73122 treatment DMSO media ctrl.lif - DMSO/220:0145-0626-0671:c:5/5 z:28/85 - DMSO/220	50.77	29.32						190406 Ctrl DMSO Inhibitor C1 DAPI C2 BF C3 Factin C4 Gata3 C5 Pard6.lif - Inhibitor/104:0153-0666-0244:c:3/5 z:31/61 - Inhibitor/104	19.08	36.17	0.898728	1.824				191228 DMSO and U73122 7.5uM C1-Factin C2-GATA3 C3- DAPI BF C4-PARD6B.lif - u73122/580:0111-0770-0700:c:1/5 z:23/56 - u73122/580	43.82		1.76979
180914 2 9 24h Par6.lif - 24h/8:0423-0356-0339:c:3/4 z:106/133 - 24h/8	18.85	33.76						apical		66.88		1.03369				220120 C1-PARD6B C2-GATA3 C3-DAPI BF C4-FACTIN 7.5uM U73122 treatment DMSO media ctrl.lif - DMSO/220:0145-0468-0710:c:5/5 z:28/85 - DMSO/220	46.75		0.75819					190406 Ctrl DMSO Inhibitor C1 DAPI C2 BF C3 Factin C4 Gata3 C5 Pard6.lif - Inhibitor/104:0153-0636-0219:c:3/5 z:31/61 - Inhibitor/104	10.35	21.48						191228 DMSO and U73122 7.5uM C1-Factin C2-GATA3 C3- DAPI BF C4-PARD6B.lif - u73122/580:0111-0749-0687:c:1/5 z:23/56 - u73122/580	30.2
180914 2 9 24h Par6.lif - 24h/8:0423-0358-0145:c:3/4 z:106/133 - 24h/8	33.43	33.28	2.71568	0.758432				cytoplasm		59.45						220120 C1-PARD6B C2-GATA3 C3-DAPI BF C4-FACTIN 7.5uM U73122 treatment DMSO media ctrl.lif - DMSO/220:0145-0441-0692:c:5/5 z:28/85 - DMSO/220	50.91							190406 Ctrl DMSO Inhibitor C1 DAPI C2 BF C3 Factin C4 Gata3 C5 Pard6.lif - Inhibitor/104:0153-0564-0247:c:3/5 z:31/61 - Inhibitor/104	21.23	19.83						191228 DMSO and U73122 7.5uM C1-Factin C2-GATA3 C3- DAPI BF C4-PARD6B.lif - u73122/580:0111-0756-0637:c:1/5 z:23/56 - u73122/580	24.76
180914 2 9 24h Par6.lif - 24h/8:0423-0382-0158:c:3/4 z:106/133 - 24h/8	21.04	33.55						basal		64.7						220120 C1-PARD6B C2-GATA3 C3-DAPI BF C4-FACTIN 7.5uM U73122 treatment DMSO media ctrl.lif - DMSO/220:0145-0477-0663:c:5/5 z:28/85 - DMSO/220	61.66							Embryo 103								Embryo 579
180914 2 9 24h Par6.lif - 24h/8:0423-0314-0176:c:3/4 z:106/133 - 24h/8	12.31	43.88						Embryo 137								Embryo 219								190406 Ctrl DMSO Inhibitor C1 DAPI C2 BF C3 Factin C4 Gata3 C5 Pard6.lif - Inhibitor/103:0128-0278-0499:c:3/5 z:25/61 - Inhibitor/103	17.26	34.31	1.07472	2.72951	1.40042	2.42769		191228 DMSO and U73122 7.5uM C1-Factin C2-GATA3 C3- DAPI BF C4-PARD6B.lif - u73122/579:0151-0352-0416:c:1/5 z:31/59 - u73122/579	82.49	82.13	1.07409	1.10112	0.732761	0.922091
180914 2 9 24h Par6.lif - 24h/8:0423-0427-0240:c:3/4 z:106/133 - 24h/8	53.3		2.64779	#DIV/0!				190613 Media only DMSO inhibitor 5uM C1Factin C2Gata3 C3Pard6b C4 DAPI C5BF.lif - DMSO/137:0121-0709-0356:c:1/5 z:25/78 - DMSO/137	193.8	56.68	2.79412	1.27571	2.52552	1.47862		220120 C1-PARD6B C2-GATA3 C3-DAPI BF C4-FACTIN 7.5uM U73122 treatment DMSO media ctrl.lif - DMSO/219:0155-0561-0671:c:5/5 z:31/85 - DMSO/219	44	41.29	1.63265	1.40825	1.02251	1.28167		190406 Ctrl DMSO Inhibitor C1 DAPI C2 BF C3 Factin C4 Gata3 C5 Pard6.lif - Inhibitor/103:0128-0350-0499:c:3/5 z:25/61 - Inhibitor/103	17.47	9.18						191228 DMSO and U73122 7.5uM C1-Factin C2-GATA3 C3- DAPI BF C4-PARD6B.lif - u73122/579:0151-0428-0455:c:1/5 z:31/59 - u73122/579	22.02	20.32
180914 2 9 24h Par6.lif - 24h/8:0423-0414-0254:c:3/4 z:106/133 - 24h/8	21.91							190613 Media only DMSO inhibitor 5uM C1Factin C2Gata3 C3Pard6b C4 DAPI C5BF.lif - DMSO/137:0121-0620-0341:c:1/5 z:25/78 - DMSO/137	55.79	46.06						220120 C1-PARD6B C2-GATA3 C3-DAPI BF C4-FACTIN 7.5uM U73122 treatment DMSO media ctrl.lif - DMSO/219:0155-0550-0662:c:5/5 z:31/85 - DMSO/219	67.45	29.2						190406 Ctrl DMSO Inhibitor C1 DAPI C2 BF C3 Factin C4 Gata3 C5 Pard6.lif - Inhibitor/103:0128-0389-0510:c:3/5 z:25/61 - Inhibitor/103	16.06	12.57						191228 DMSO and U73122 7.5uM C1-Factin C2-GATA3 C3- DAPI BF C4-PARD6B.lif - u73122/579:0151-0595-0441:c:1/5 z:31/59 - u73122/579	76.8	12.12
180914 2 9 24h Par6.lif - 24h/8:0423-0392-0269:c:3/4 z:106/133 - 24h/8	20.13							190613 Media only DMSO inhibitor 5uM C1Factin C2Gata3 C3Pard6b C4 DAPI C5BF.lif - DMSO/137:0121-0604-0427:c:1/5 z:25/78 - DMSO/137	69.36	44.43						220120 C1-PARD6B C2-GATA3 C3-DAPI BF C4-FACTIN 7.5uM U73122 treatment DMSO media ctrl.lif - DMSO/219:0155-0521-0576:c:5/5 z:31/85 - DMSO/219	26.95	29.32						190406 Ctrl DMSO Inhibitor C1 DAPI C2 BF C3 Factin C4 Gata3 C5 Pard6.lif - Inhibitor/103:0093-0451-0690:c:3/5 z:19/61 - Inhibitor/103	14.83	35.21	0.971822	1.43072				191228 DMSO and U73122 7.5uM C1-Factin C2-GATA3 C3- DAPI BF C4-PARD6B.lif - u73122/579:0151-0724-0593:c:1/5 z:31/59 - u73122/579	34.87	104.22	0.362776	0.762994
180914 2 9 24h Par6.lif - 24h/8:0423-0402-0316:c:3/4 z:106/133 - 24h/8	51.84		2.1457	#DIV/0!				190613 Media only DMSO inhibitor 5uM C1Factin C2Gata3 C3Pard6b C4 DAPI C5BF.lif - DMSO/137:0121-0800-0578:c:1/5 z:25/78 - DMSO/137	158.98	49.36	2.64218	1.60156				220120 C1-PARD6B C2-GATA3 C3-DAPI BF C4-FACTIN 7.5uM U73122 treatment DMSO media ctrl.lif - DMSO/219:0155-0583-0453:c:5/5 z:31/85 - DMSO/219	26.77	38.68	0.676352	1.0691				190406 Ctrl DMSO Inhibitor C1 DAPI C2 BF C3 Factin C4 Gata3 C5 Pard6.lif - Inhibitor/103:0093-0452-0665:c:3/5 z:19/61 - Inhibitor/103	11.68	28.08						191228 DMSO and U73122 7.5uM C1-Factin C2-GATA3 C3- DAPI BF C4-PARD6B.lif - u73122/579:0151-0701-0589:c:1/5 z:31/59 - u73122/579	25.06	20.59
180914 2 9 24h Par6.lif - 24h/8:0423-0392-0313:c:3/4 z:106/133 - 24h/8	22.34							190613 Media only DMSO inhibitor 5uM C1Factin C2Gata3 C3Pard6b C4 DAPI C5BF.lif - DMSO/137:0121-0762-0614:c:1/5 z:25/78 - DMSO/137	50.9	34.55						220120 C1-PARD6B C2-GATA3 C3-DAPI BF C4-FACTIN 7.5uM U73122 treatment DMSO media ctrl.lif - DMSO/219:0155-0564-0433:c:5/5 z:31/85 - DMSO/219	67.11	31.34						190406 Ctrl DMSO Inhibitor C1 DAPI C2 BF C3 Factin C4 Gata3 C5 Pard6.lif - Inhibitor/103:0093-0478-0595:c:3/5 z:19/61 - Inhibitor/103	15.26	24.61						191228 DMSO and U73122 7.5uM C1-Factin C2-GATA3 C3- DAPI BF C4-PARD6B.lif - u73122/579:0151-0593-0493:c:1/5 z:31/59 - u73122/579	96.12	14.39
180914 2 9 24h Par6.lif - 24h/8:0423-0355-0294:c:3/4 z:106/133 - 24h/8	24.16							190613 Media only DMSO inhibitor 5uM C1Factin C2Gata3 C3Pard6b C4 DAPI C5BF.lif - DMSO/137:0121-0696-0654:c:1/5 z:25/78 - DMSO/137	60.17	30.82						220120 C1-PARD6B C2-GATA3 C3-DAPI BF C4-FACTIN 7.5uM U73122 treatment DMSO media ctrl.lif - DMSO/219:0155-0511-0483:c:5/5 z:31/85 - DMSO/219	39.58	36.18						190406 Ctrl DMSO Inhibitor C1 DAPI C2 BF C3 Factin C4 Gata3 C5 Pard6.lif - Inhibitor/103:0093-0690-0676:c:3/5 z:19/61 - Inhibitor/103	32.23	45.09	1.47236	2.92792				191228 DMSO and U73122 7.5uM C1-Factin C2-GATA3 C3- DAPI BF C4-PARD6B.lif - u73122/579:0106-0452-0654:c:1/5 z:21/59 - u73122/579	35.01	55.59	0.761418	0.902165
Embryo 7								190613 Media only DMSO inhibitor 5uM C1Factin C2Gata3 C3Pard6b C4 DAPI C5BF.lif - DMSO/137:0121-0642-0787:c:1/5 z:25/78 - DMSO/137	111.74	41.42	3.76609	1.30952				220120 C1-PARD6B C2-GATA3 C3-DAPI BF C4-FACTIN 7.5uM U73122 treatment DMSO media ctrl.lif - DMSO/219:0155-0374-0661:c:5/5 z:31/85 - DMSO/219	37.28	35.46	0.819881	1.32561				190406 Ctrl DMSO Inhibitor C1 DAPI C2 BF C3 Factin C4 Gata3 C5 Pard6.lif - Inhibitor/103:0093-0721-0634:c:3/5 z:19/61 - Inhibitor/103	28.06	19.1						191228 DMSO and U73122 7.5uM C1-Factin C2-GATA3 C3- DAPI BF C4-PARD6B.lif - u73122/579:0106-0501-0646:c:1/5 z:21/59 - u73122/579	24.79	12.93
180914 2 9 24h Par6.lif - 24h/7:0407-0102-0219:c:3/4 z:102/133 - 24h/7	49.6	62.78	1.51081	1.5095	2.37758	1.66647		190613 Media only DMSO inhibitor 5uM C1Factin C2Gata3 C3Pard6b C4 DAPI C5BF.lif - DMSO/137:0121-0646-0762:c:1/5 z:25/78 - DMSO/137	81.06	29.65						220120 C1-PARD6B C2-GATA3 C3-DAPI BF C4-FACTIN 7.5uM U73122 treatment DMSO media ctrl.lif - DMSO/219:0155-0349-0590:c:5/5 z:31/85 - DMSO/219	56.79	32.88						190406 Ctrl DMSO Inhibitor C1 DAPI C2 BF C3 Factin C4 Gata3 C5 Pard6.lif - Inhibitor/103:0093-0681-0552:c:3/5 z:19/61 - Inhibitor/103	21.89	15.4						191228 DMSO and U73122 7.5uM C1-Factin C2-GATA3 C3- DAPI BF C4-PARD6B.lif - u73122/579:0106-0438-0506:c:1/5 z:21/59 - u73122/579	45.98	19.15
180914 2 9 24h Par6.lif - 24h/7:0407-0137-0238:c:3/4 z:102/133 - 24h/7	35.59	40.04						190613 Media only DMSO inhibitor 5uM C1Factin C2Gata3 C3Pard6b C4 DAPI C5BF.lif - DMSO/137:0121-0446-0779:c:1/5 z:25/78 - DMSO/137	29.67	31.63						220120 C1-PARD6B C2-GATA3 C3-DAPI BF C4-FACTIN 7.5uM U73122 treatment DMSO media ctrl.lif - DMSO/219:0155-0445-0598:c:5/5 z:31/85 - DMSO/219	45.47	26.75						190406 Ctrl DMSO Inhibitor C1 DAPI C2 BF C3 Factin C4 Gata3 C5 Pard6.lif - Inhibitor/103:0093-0786-0430:c:3/5 z:19/61 - Inhibitor/103	39.2	34.33	1.40754	2.62261				Embryo 200
180914 2 9 24h Par6.lif - 24h/7:0407-0150-0250:c:3/4 z:102/133 - 24h/7	32.83	41.59						190613 Media only DMSO inhibitor 5uM C1Factin C2Gata3 C3Pard6b C4 DAPI C5BF.lif - DMSO/137:0121-0358-0757:c:1/5 z:25/78 - DMSO/137	88.3	58.31	1.55212	1.7277				220120 C1-PARD6B C2-GATA3 C3-DAPI BF C4-FACTIN 7.5uM U73122 treatment DMSO media ctrl.lif - DMSO/219:0155-0395-0408:c:5/5 z:31/85 - DMSO/219	37.59	39.99	0.961135	1.49719				190406 Ctrl DMSO Inhibitor C1 DAPI C2 BF C3 Factin C4 Gata3 C5 Pard6.lif - Inhibitor/103:0093-0734-0432:c:3/5 z:19/61 - Inhibitor/103	29.3	14.73						220120 C1-PARD6B C2-GATA3 C3-DAPI BF C4-FACTIN 7.5uM U73122 treatment DMSO media ctrl.lif - U73122 7.5uM/200:0180-0280-0487:c:5/5 z:36/76 - U73122 7.5uM/200	43.35	64.08	1.1369	1.30258	1.16464	1.2604
180914 2 9 24h Par6.lif - 24h/7:0407-0155-0323:c:3/4 z:102/133 - 24h/7	45.85	118.99	1.96024	2.36937				190613 Media only DMSO inhibitor 5uM C1Factin C2Gata3 C3Pard6b C4 DAPI C5BF.lif - DMSO/137:0121-0319-0747:c:1/5 z:25/78 - DMSO/137	43.23	49.98						220120 C1-PARD6B C2-GATA3 C3-DAPI BF C4-FACTIN 7.5uM U73122 treatment DMSO media ctrl.lif - DMSO/219:0155-0400-0423:c:5/5 z:31/85 - DMSO/219	31.8	30.17						190406 Ctrl DMSO Inhibitor C1 DAPI C2 BF C3 Factin C4 Gata3 C5 Pard6.lif - Inhibitor/103:0093-0663-0310:c:3/5 z:19/61 - Inhibitor/103	27.85	13.09						220120 C1-PARD6B C2-GATA3 C3-DAPI BF C4-FACTIN 7.5uM U73122 treatment DMSO media ctrl.lif - U73122 7.5uM/200:0180-0322-0474:c:5/5 z:36/76 - U73122 7.5uM/200	50.59	80.46
180914 2 9 24h Par6.lif - 24h/7:0407-0170-0349:c:3/4 z:102/133 - 24h/7	16	58.18						190613 Media only DMSO inhibitor 5uM C1Factin C2Gata3 C3Pard6b C4 DAPI C5BF.lif - DMSO/137:0121-0300-0664:c:1/5 z:25/78 - DMSO/137	56.89	33.75						220120 C1-PARD6B C2-GATA3 C3-DAPI BF C4-FACTIN 7.5uM U73122 treatment DMSO media ctrl.lif - DMSO/219:0155-0477-0435:c:5/5 z:31/85 - DMSO/219	39.11	26.71						190406 Ctrl DMSO Inhibitor C1 DAPI C2 BF C3 Factin C4 Gata3 C5 Pard6.lif - Inhibitor/103:0098-0469-0254:c:3/5 z:20/61 - Inhibitor/103	35.93		2.07568					220120 C1-PARD6B C2-GATA3 C3-DAPI BF C4-FACTIN 7.5uM U73122 treatment DMSO media ctrl.lif - U73122 7.5uM/200:0180-0369-0504:c:5/5 z:36/76 - U73122 7.5uM/200	38.13	31.61
180914 2 9 24h Par6.lif - 24h/7:0407-0194-0321:c:3/4 z:102/133 - 24h/7	23.39	50.22						190613 Media only DMSO inhibitor 5uM C1Factin C2Gata3 C3Pard6b C4 DAPI C5BF.lif - DMSO/137:0121-0281-0540:c:1/5 z:25/78 - DMSO/137	91.65		1.87308					apical		29.8		1.10822				190406 Ctrl DMSO Inhibitor C1 DAPI C2 BF C3 Factin C4 Gata3 C5 Pard6.lif - Inhibitor/103:0098-0494-0302:c:3/5 z:20/61 - Inhibitor/103	25.44							220120 C1-PARD6B C2-GATA3 C3-DAPI BF C4-FACTIN 7.5uM U73122 treatment DMSO media ctrl.lif - U73122 7.5uM/200:0180-0360-0664:c:5/5 z:36/76 - U73122 7.5uM/200	34.02	70.14	0.929254	1.01093
180914 2 9 24h Par6.lif - 24h/7:0407-0283-0161:c:3/4 z:102/133 - 24h/7	71.8	129.32	3.45192	2.49268				190613 Media only DMSO inhibitor 5uM C1Factin C2Gata3 C3Pard6b C4 DAPI C5BF.lif - DMSO/137:0121-0299-0594:c:1/5 z:25/78 - DMSO/137	67.93							cytoplasm		23.48						190406 Ctrl DMSO Inhibitor C1 DAPI C2 BF C3 Factin C4 Gata3 C5 Pard6.lif - Inhibitor/103:0098-0400-0320:c:3/5 z:20/61 - Inhibitor/103	17.31							220120 C1-PARD6B C2-GATA3 C3-DAPI BF C4-FACTIN 7.5uM U73122 treatment DMSO media ctrl.lif - U73122 7.5uM/200:0180-0383-0640:c:5/5 z:36/76 - U73122 7.5uM/200	36.88	37.76
180914 2 9 24h Par6.lif - 24h/7:0407-0259-0195:c:3/4 z:102/133 - 24h/7	20.13	54.89						190613 Media only DMSO inhibitor 5uM C1Factin C2Gata3 C3Pard6b C4 DAPI C5BF.lif - DMSO/137:0121-0412-0568:c:1/5 z:25/78 - DMSO/137	48.93							basal		26.89						Embryo 102								220120 C1-PARD6B C2-GATA3 C3-DAPI BF C4-FACTIN 7.5uM U73122 treatment DMSO media ctrl.lif - U73122 7.5uM/200:0180-0400-0607:c:5/5 z:36/76 - U73122 7.5uM/200	36.61	9.31
180914 2 9 24h Par6.lif - 24h/7:0407-0252-0219:c:3/4 z:102/133 - 24h/7	20.8	51.88														Embryo 218								190406 Ctrl DMSO Inhibitor C1 DAPI C2 BF C3 Factin C4 Gata3 C5 Pard6.lif - Inhibitor/102:0193-0616-0265:c:3/5 z:39/61 - Inhibitor/102	23.76	47.19	1.88871	2.50478	1.37543	2.61168		220120 C1-PARD6B C2-GATA3 C3-DAPI BF C4-FACTIN 7.5uM U73122 treatment DMSO media ctrl.lif - U73122 7.5uM/200:0120-0433-0331:c:5/5 z:24/76 - U73122 7.5uM/200	71.01	69.81	1.28223	1.07162
180914 2 9 24h Par6.lif - 24h/7:0407-0343-0271:c:3/4 z:102/133 - 24h/7	29.04	74.65	1.57569	1.50869												220120 C1-PARD6B C2-GATA3 C3-DAPI BF C4-FACTIN 7.5uM U73122 treatment DMSO media ctrl.lif - DMSO/218:0300-0286-0521:c:5/5 z:60/90 - DMSO/218	57.62	34.05	2.70898	1.48885	2.07334	1.80574		190406 Ctrl DMSO Inhibitor C1 DAPI C2 BF C3 Factin C4 Gata3 C5 Pard6.lif - Inhibitor/102:0193-0589-0252:c:3/5 z:39/61 - Inhibitor/102	15.94	23.78						220120 C1-PARD6B C2-GATA3 C3-DAPI BF C4-FACTIN 7.5uM U73122 treatment DMSO media ctrl.lif - U73122 7.5uM/200:0120-0415-0387:c:5/5 z:24/76 - U73122 7.5uM/200	64.2	39.77
180914 2 9 24h Par6.lif - 24h/7:0407-0343-0315:c:3/4 z:102/133 - 24h/7	13.26	56.47														220120 C1-PARD6B C2-GATA3 C3-DAPI BF C4-FACTIN 7.5uM U73122 treatment DMSO media ctrl.lif - DMSO/218:0300-0351-0464:c:5/5 z:60/90 - DMSO/218	20.37	32.38						190406 Ctrl DMSO Inhibitor C1 DAPI C2 BF C3 Factin C4 Gata3 C5 Pard6.lif - Inhibitor/102:0193-0477-0310:c:3/5 z:39/61 - Inhibitor/102	12.58	18.84						220120 C1-PARD6B C2-GATA3 C3-DAPI BF C4-FACTIN 7.5uM U73122 treatment DMSO media ctrl.lif - U73122 7.5uM/200:0120-0451-0435:c:5/5 z:24/76 - U73122 7.5uM/200	55.38	17.92
180914 2 9 24h Par6.lif - 24h/7:0407-0340-0254:c:3/4 z:102/133 - 24h/7	18.43	49.48														220120 C1-PARD6B C2-GATA3 C3-DAPI BF C4-FACTIN 7.5uM U73122 treatment DMSO media ctrl.lif - DMSO/218:0300-0416-0585:c:5/5 z:60/90 - DMSO/218	21.27	22.87						190406 Ctrl DMSO Inhibitor C1 DAPI C2 BF C3 Factin C4 Gata3 C5 Pard6.lif - Inhibitor/102:0193-0723-0481:c:3/5 z:39/61 - Inhibitor/102	29.66	44.61	1.54318	3.58026				220120 C1-PARD6B C2-GATA3 C3-DAPI BF C4-FACTIN 7.5uM U73122 treatment DMSO media ctrl.lif - U73122 7.5uM/200:0165-0629-0439:c:5/5 z:31/76 - U73122 7.5uM/200	44.71	97.79	0.926056	1.40172
180914 2 9 24h Par6.lif - 24h/7:0367-0246-0370:c:3/4 z:93/133 - 24h/7	98.41	117.95	3.16736	1.8447												220120 C1-PARD6B C2-GATA3 C3-DAPI BF C4-FACTIN 7.5uM U73122 treatment DMSO media ctrl.lif - DMSO/218:0300-0676-0633:c:5/5 z:60/90 - DMSO/218	42.73	27.17	2.26085	1.68131				190406 Ctrl DMSO Inhibitor C1 DAPI C2 BF C3 Factin C4 Gata3 C5 Pard6.lif - Inhibitor/102:0193-0698-0491:c:3/5 z:39/61 - Inhibitor/102	20.79	18.56						220120 C1-PARD6B C2-GATA3 C3-DAPI BF C4-FACTIN 7.5uM U73122 treatment DMSO media ctrl.lif - U73122 7.5uM/200:0165-0619-0434:c:5/5 z:31/76 - U73122 7.5uM/200	56.79	27.36
180914 2 9 24h Par6.lif - 24h/7:0367-0268-0354:c:3/4 z:93/133 - 24h/7	31.44	52.21														220120 C1-PARD6B C2-GATA3 C3-DAPI BF C4-FACTIN 7.5uM U73122 treatment DMSO media ctrl.lif - DMSO/218:0300-0663-0660:c:5/5 z:60/90 - DMSO/218	20.97	22.71						190406 Ctrl DMSO Inhibitor C1 DAPI C2 BF C3 Factin C4 Gata3 C5 Pard6.lif - Inhibitor/102:0193-0585-0559:c:3/5 z:39/61 - Inhibitor/102	19.22	12.46						220120 C1-PARD6B C2-GATA3 C3-DAPI BF C4-FACTIN 7.5uM U73122 treatment DMSO media ctrl.lif - U73122 7.5uM/200:0165-0561-0458:c:5/5 z:31/76 - U73122 7.5uM/200	48.28	23.52
180914 2 9 24h Par6.lif - 24h/7:0367-0192-0320:c:3/4 z:93/133 - 24h/7	31.07	63.94														220120 C1-PARD6B C2-GATA3 C3-DAPI BF C4-FACTIN 7.5uM U73122 treatment DMSO media ctrl.lif - DMSO/218:0300-0566-0598:c:5/5 z:60/90 - DMSO/218	18.9	16.16						190406 Ctrl DMSO Inhibitor C1 DAPI C2 BF C3 Factin C4 Gata3 C5 Pard6.lif - Inhibitor/102:0193-0620-0668:c:3/5 z:39/61 - Inhibitor/102	17.23	36.19	0.837628	4.37606				220120 C1-PARD6B C2-GATA3 C3-DAPI BF C4-FACTIN 7.5uM U73122 treatment DMSO media ctrl.lif - U73122 7.5uM/200:0230-0583-0646:c:5/5 z:46/76 - U73122 7.5uM/200	38.61	84.77	1.44769	1.51514
180914 2 9 24h Par6.lif - 24h/7:0367-0257-0169:c:3/4 z:93/133 - 24h/7	71.64	39.43	2.59942	0.774656												220120 C1-PARD6B C2-GATA3 C3-DAPI BF C4-FACTIN 7.5uM U73122 treatment DMSO media ctrl.lif - DMSO/218:0125-0410-0553:c:5/5 z:23/90 - DMSO/218	45.05	30.36	1.47947	1.19669				190406 Ctrl DMSO Inhibitor C1 DAPI C2 BF C3 Factin C4 Gata3 C5 Pard6.lif - Inhibitor/102:0193-0654-0664:c:3/5 z:39/61 - Inhibitor/102	11.87	12.63						220120 C1-PARD6B C2-GATA3 C3-DAPI BF C4-FACTIN 7.5uM U73122 treatment DMSO media ctrl.lif - U73122 7.5uM/200:0230-0593-0616:c:5/5 z:46/76 - U73122 7.5uM/200	38.62	50.05
180914 2 9 24h Par6.lif - 24h/7:0367-0238-0181:c:3/4 z:93/133 - 24h/7	31.75	51.33														220120 C1-PARD6B C2-GATA3 C3-DAPI BF C4-FACTIN 7.5uM U73122 treatment DMSO media ctrl.lif - DMSO/218:0125-0426-0600:c:5/5 z:23/90 - DMSO/218	56.67	25.31						190406 Ctrl DMSO Inhibitor C1 DAPI C2 BF C3 Factin C4 Gata3 C5 Pard6.lif - Inhibitor/102:0193-0617-0615:c:3/5 z:39/61 - Inhibitor/102	20.57	8.27						220120 C1-PARD6B C2-GATA3 C3-DAPI BF C4-FACTIN 7.5uM U73122 treatment DMSO media ctrl.lif - U73122 7.5uM/200:0230-0516-0609:c:5/5 z:46/76 - U73122 7.5uM/200	26.67	25.59
180914 2 9 24h Par6.lif - 24h/7:0367-0208-0205:c:3/4 z:93/133 - 24h/7	27.56	50.9														220120 C1-PARD6B C2-GATA3 C3-DAPI BF C4-FACTIN 7.5uM U73122 treatment DMSO media ctrl.lif - DMSO/218:0125-0522-0565:c:5/5 z:23/90 - DMSO/218	30.45	25.37						190406 Ctrl DMSO Inhibitor C1 DAPI C2 BF C3 Factin C4 Gata3 C5 Pard6.lif - Inhibitor/102:0213-0421-0766:c:3/5 z:43/61 - Inhibitor/102	25.96	56.94	1.84244	2.11516				220120 C1-PARD6B C2-GATA3 C3-DAPI BF C4-FACTIN 7.5uM U73122 treatment DMSO media ctrl.lif - U73122 7.5uM/200:0230-0382-0651:c:5/5 z:46/76 - U73122 7.5uM/200	27.58		1.26572
apical		60.23		1.16567												220120 C1-PARD6B C2-GATA3 C3-DAPI BF C4-FACTIN 7.5uM U73122 treatment DMSO media ctrl.lif - DMSO/218:0125-0585-0448:c:5/5 z:23/90 - DMSO/218	39.02	35.53	1.84405	2.85611				190406 Ctrl DMSO Inhibitor C1 DAPI C2 BF C3 Factin C4 Gata3 C5 Pard6.lif - Inhibitor/102:0213-0445-0735:c:3/5 z:43/61 - Inhibitor/102	11.27	22.86						220120 C1-PARD6B C2-GATA3 C3-DAPI BF C4-FACTIN 7.5uM U73122 treatment DMSO media ctrl.lif - U73122 7.5uM/200:0230-0400-0626:c:5/5 z:46/76 - U73122 7.5uM/200	29.34
cytoplasm		51.02														220120 C1-PARD6B C2-GATA3 C3-DAPI BF C4-FACTIN 7.5uM U73122 treatment DMSO media ctrl.lif - DMSO/218:0125-0578-0454:c:5/5 z:23/90 - DMSO/218	73.65	42.69						190406 Ctrl DMSO Inhibitor C1 DAPI C2 BF C3 Factin C4 Gata3 C5 Pard6.lif - Inhibitor/102:0213-0488-0684:c:3/5 z:43/61 - Inhibitor/102	14.09	26.92						220120 C1-PARD6B C2-GATA3 C3-DAPI BF C4-FACTIN 7.5uM U73122 treatment DMSO media ctrl.lif - U73122 7.5uM/200:0230-0454-0613:c:5/5 z:46/76 - U73122 7.5uM/200	21.79
basal		51.67														220120 C1-PARD6B C2-GATA3 C3-DAPI BF C4-FACTIN 7.5uM U73122 treatment DMSO media ctrl.lif - DMSO/218:0125-0578-0527:c:5/5 z:23/90 - DMSO/218	21.16	12.44						190406 Ctrl DMSO Inhibitor C1 DAPI C2 BF C3 Factin C4 Gata3 C5 Pard6.lif - Inhibitor/102:0228-0226-0570:c:3/5 z:46/61 - Inhibitor/102	18.64	44.19	0.765189	1.21135				Embryo 198
Embryo 6																Embryo 217								190406 Ctrl DMSO Inhibitor C1 DAPI C2 BF C3 Factin C4 Gata3 C5 Pard6.lif - Inhibitor/102:0228-0216-0565:c:3/5 z:46/61 - Inhibitor/102	5.35	36.45						220120 C1-PARD6B C2-GATA3 C3-DAPI BF C4-FACTIN 7.5uM U73122 treatment DMSO media ctrl.lif - U73122 7.5uM/198:0230-0390-0426:c:5/5 z:46/77 - U73122 7.5uM/198	37.81	98.61	0.977003	0.916811	1.31386	1.33613
180914 2 9 24h Par6.lif - 24h/6:0347-0187-0195:c:3/4 z:86/133 - 24h/6	40.93	55.13	3.10782		3.07133	3.54959										220120 C1-PARD6B C2-GATA3 C3-DAPI BF C4-FACTIN 7.5uM U73122 treatment DMSO media ctrl.lif - DMSO/217:0205-0295-0685:c:5/5 z:40/99 - DMSO/217	50.52	49.02	0.597799	1.61356	1.04608	1.34035		190406 Ctrl DMSO Inhibitor C1 DAPI C2 BF C3 Factin C4 Gata3 C5 Pard6.lif - Inhibitor/102:0228-0324-0586:c:3/5 z:46/61 - Inhibitor/102	24.36	36.48						220120 C1-PARD6B C2-GATA3 C3-DAPI BF C4-FACTIN 7.5uM U73122 treatment DMSO media ctrl.lif - U73122 7.5uM/198:0230-0397-0426:c:5/5 z:46/77 - U73122 7.5uM/198	38.06	28.93
180914 2 9 24h Par6.lif - 24h/6:0347-0191-0204:c:3/4 z:86/133 - 24h/6	11.68	34.69														220120 C1-PARD6B C2-GATA3 C3-DAPI BF C4-FACTIN 7.5uM U73122 treatment DMSO media ctrl.lif - DMSO/217:0205-0340-0710:c:5/5 z:40/99 - DMSO/217	47.81	47.29						apical		41.81		1.88249				220120 C1-PARD6B C2-GATA3 C3-DAPI BF C4-FACTIN 7.5uM U73122 treatment DMSO media ctrl.lif - U73122 7.5uM/198:0230-0456-0434:c:5/5 z:46/77 - U73122 7.5uM/198	38.7	41.83
180914 2 9 24h Par6.lif - 24h/6:0347-0209-0232:c:3/4 z:86/133 - 24h/6	13.17	43.17														220120 C1-PARD6B C2-GATA3 C3-DAPI BF C4-FACTIN 7.5uM U73122 treatment DMSO media ctrl.lif - DMSO/217:0205-0378-0708:c:5/5 z:40/99 - DMSO/217	84.51	30.38						cytoplasm		25.92						220120 C1-PARD6B C2-GATA3 C3-DAPI BF C4-FACTIN 7.5uM U73122 treatment DMSO media ctrl.lif - U73122 7.5uM/198:0230-0577-0298:c:5/5 z:46/77 - U73122 7.5uM/198	36.84	74.27	1.66396	1.33561
180914 2 9 24h Par6.lif - 24h/6:0367-0190-0275:c:3/4 z:96/133 - 24h/6	29.66	24.36	2.60404													220120 C1-PARD6B C2-GATA3 C3-DAPI BF C4-FACTIN 7.5uM U73122 treatment DMSO media ctrl.lif - DMSO/217:0205-0436-0806:c:5/5 z:40/99 - DMSO/217	45.25	49.49	1.24931	1.37129				basal		22.21						220120 C1-PARD6B C2-GATA3 C3-DAPI BF C4-FACTIN 7.5uM U73122 treatment DMSO media ctrl.lif - U73122 7.5uM/198:0230-0574-0317:c:5/5 z:46/77 - U73122 7.5uM/198	43.91	23.96
180914 2 9 24h Par6.lif - 24h/6:0367-0204-0291:c:3/4 z:96/133 - 24h/6	10.45	22.6														220120 C1-PARD6B C2-GATA3 C3-DAPI BF C4-FACTIN 7.5uM U73122 treatment DMSO media ctrl.lif - DMSO/217:0205-0465-0775:c:5/5 z:40/99 - DMSO/217	59.56	46.1						Embryo 101								220120 C1-PARD6B C2-GATA3 C3-DAPI BF C4-FACTIN 7.5uM U73122 treatment DMSO media ctrl.lif - U73122 7.5uM/198:0230-0615-0379:c:5/5 z:46/77 - U73122 7.5uM/198	22.14	31.71
180914 2 9 24h Par6.lif - 24h/6:0367-0221-0274:c:3/4 z:96/133 - 24h/6	11.39	52.48														220120 C1-PARD6B C2-GATA3 C3-DAPI BF C4-FACTIN 7.5uM U73122 treatment DMSO media ctrl.lif - DMSO/217:0205-0510-0694:c:5/5 z:40/99 - DMSO/217	36.22	36.09						190406 Ctrl DMSO Inhibitor C1 DAPI C2 BF C3 Factin C4 Gata3 C5 Pard6.lif - Inhibitor/101:0168-0360-0353:c:3/5 z:34/61 - Inhibitor/101	40.57	56.43	4.76174	2.00177	2.55229	1.66957		220120 C1-PARD6B C2-GATA3 C3-DAPI BF C4-FACTIN 7.5uM U73122 treatment DMSO media ctrl.lif - U73122 7.5uM/198:0230-0705-0516:c:5/5 z:46/77 - U73122 7.5uM/198	65.03	22.96	1.76616	1.64315
180914 2 9 24h Par6.lif - 24h/6:0367-0268-0153:c:3/4 z:96/133 - 24h/6	46.35	24.65	2.32447													220120 C1-PARD6B C2-GATA3 C3-DAPI BF C4-FACTIN 7.5uM U73122 treatment DMSO media ctrl.lif - DMSO/217:0205-0301-0513:c:5/5 z:40/99 - DMSO/217	56.21	39.71	1.45245	1.08646				190406 Ctrl DMSO Inhibitor C1 DAPI C2 BF C3 Factin C4 Gata3 C5 Pard6.lif - Inhibitor/101:0168-0327-0356:c:3/5 z:34/61 - Inhibitor/101	13.56	25.53						220120 C1-PARD6B C2-GATA3 C3-DAPI BF C4-FACTIN 7.5uM U73122 treatment DMSO media ctrl.lif - U73122 7.5uM/198:0230-0709-0448:c:5/5 z:46/77 - U73122 7.5uM/198	32.2	24.36
180914 2 9 24h Par6.lif - 24h/6:0367-0274-0162:c:3/4 z:96/133 - 24h/6	8.87	26.38														220120 C1-PARD6B C2-GATA3 C3-DAPI BF C4-FACTIN 7.5uM U73122 treatment DMSO media ctrl.lif - DMSO/217:0205-0332-0541:c:5/5 z:40/99 - DMSO/217	52.22	37.35						190406 Ctrl DMSO Inhibitor C1 DAPI C2 BF C3 Factin C4 Gata3 C5 Pard6.lif - Inhibitor/101:0168-0419-0390:c:3/5 z:34/61 - Inhibitor/101	8.52	28.19						220120 C1-PARD6B C2-GATA3 C3-DAPI BF C4-FACTIN 7.5uM U73122 treatment DMSO media ctrl.lif - U73122 7.5uM/198:0230-0632-0412:c:5/5 z:46/77 - U73122 7.5uM/198	36.82	30.78
180914 2 9 24h Par6.lif - 24h/6:0367-0250-0182:c:3/4 z:96/133 - 24h/6	19.94	50.65														220120 C1-PARD6B C2-GATA3 C3-DAPI BF C4-FACTIN 7.5uM U73122 treatment DMSO media ctrl.lif - DMSO/217:0205-0398-0624:c:5/5 z:40/99 - DMSO/217	38.7	36.55						190406 Ctrl DMSO Inhibitor C1 DAPI C2 BF C3 Factin C4 Gata3 C5 Pard6.lif - Inhibitor/101:0168-0426-0602:c:3/5 z:34/61 - Inhibitor/101	23.49	57.39	4.14286	2.47584				220120 C1-PARD6B C2-GATA3 C3-DAPI BF C4-FACTIN 7.5uM U73122 treatment DMSO media ctrl.lif - U73122 7.5uM/198:0150-0397-0547:c:5/5 z:33/77 - U73122 7.5uM/198	44.35	112.86	0.848317	1.44896
180914 2 9 24h Par6.lif - 24h/6:0367-0369-0154:c:3/4 z:96/133 - 24h/6	24.33	23.57	1.02184													220120 C1-PARD6B C2-GATA3 C3-DAPI BF C4-FACTIN 7.5uM U73122 treatment DMSO media ctrl.lif - DMSO/217:0120-0628-0546:c:5/5 z:21/99 - DMSO/217	58.39	38.63	0.858676	1.17274				190406 Ctrl DMSO Inhibitor C1 DAPI C2 BF C3 Factin C4 Gata3 C5 Pard6.lif - Inhibitor/101:0168-0372-0593:c:3/5 z:34/61 - Inhibitor/101	14.32	26.14						220120 C1-PARD6B C2-GATA3 C3-DAPI BF C4-FACTIN 7.5uM U73122 treatment DMSO media ctrl.lif - U73122 7.5uM/198:0150-0404-0534:c:5/5 z:33/77 - U73122 7.5uM/198	49.47	30.88
180914 2 9 24h Par6.lif - 24h/6:0367-0385-0150:c:3/4 z:96/133 - 24h/6	12.63	21.93														220120 C1-PARD6B C2-GATA3 C3-DAPI BF C4-FACTIN 7.5uM U73122 treatment DMSO media ctrl.lif - DMSO/217:0120-0649-0588:c:5/5 z:21/99 - DMSO/217	63.21	28						190406 Ctrl DMSO Inhibitor C1 DAPI C2 BF C3 Factin C4 Gata3 C5 Pard6.lif - Inhibitor/101:0168-0484-0549:c:3/5 z:34/61 - Inhibitor/101	5.67	23.18						220120 C1-PARD6B C2-GATA3 C3-DAPI BF C4-FACTIN 7.5uM U73122 treatment DMSO media ctrl.lif - U73122 7.5uM/198:0150-0418-0523:c:5/5 z:33/77 - U73122 7.5uM/198	52.28	14.09
180914 2 9 24h Par6.lif - 24h/6:0367-0349-0179:c:3/4 z:96/133 - 24h/6	23.81	77.84		3.70504												220120 C1-PARD6B C2-GATA3 C3-DAPI BF C4-FACTIN 7.5uM U73122 treatment DMSO media ctrl.lif - DMSO/217:0120-0565-0617:c:5/5 z:21/99 - DMSO/217	68	32.94						190406 Ctrl DMSO Inhibitor C1 DAPI C2 BF C3 Factin C4 Gata3 C5 Pard6.lif - Inhibitor/101:0163-0657-0524:c:3/5 z:33/61 - Inhibitor/101	42.62	34.72	2.76394	1.82545				Embryo 195
180914 2 9 24h Par6.lif - 24h/6:0367-0428-0235:c:3/4 z:96/133 - 24h/6	75.33	30.6	6.00239													220120 C1-PARD6B C2-GATA3 C3-DAPI BF C4-FACTIN 7.5uM U73122 treatment DMSO media ctrl.lif - DMSO/217:0120-0511-0710:c:5/5 z:21/99 - DMSO/217	66.55	75.3	1.07218	2.13556				190406 Ctrl DMSO Inhibitor C1 DAPI C2 BF C3 Factin C4 Gata3 C5 Pard6.lif - Inhibitor/101:0163-0674-0538:c:3/5 z:33/61 - Inhibitor/101	18.13	22.01						220120 C1-PARD6B C2-GATA3 C3-DAPI BF C4-FACTIN 7.5uM U73122 treatment DMSO media ctrl.lif - U73122 7.5uM/195:0170-0477-0349:c:5/5 z:34/76 - U73122 7.5uM/195	70.71	44.56	1.54321	1.15664	2.07536	1.26826
180914 2 9 24h Par6.lif - 24h/6:0367-0418-0237:c:3/4 z:96/133 - 24h/6	11.38	40.72														220120 C1-PARD6B C2-GATA3 C3-DAPI BF C4-FACTIN 7.5uM U73122 treatment DMSO media ctrl.lif - DMSO/217:0120-0503-0688:c:5/5 z:21/99 - DMSO/217	66.4	30.7						190406 Ctrl DMSO Inhibitor C1 DAPI C2 BF C3 Factin C4 Gata3 C5 Pard6.lif - Inhibitor/101:0163-0669-0420:c:3/5 z:33/61 - Inhibitor/101	15.42	19.02						220120 C1-PARD6B C2-GATA3 C3-DAPI BF C4-FACTIN 7.5uM U73122 treatment DMSO media ctrl.lif - U73122 7.5uM/195:0170-0499-0360:c:5/5 z:34/76 - U73122 7.5uM/195	55.26	23.6
180914 2 9 24h Par6.lif - 24h/6:0367-0401-0260:c:3/4 z:96/133 - 24h/6	12.55	58.29		3.39415												220120 C1-PARD6B C2-GATA3 C3-DAPI BF C4-FACTIN 7.5uM U73122 treatment DMSO media ctrl.lif - DMSO/217:0120-0561-0616:c:5/5 z:21/99 - DMSO/217	62.07	35.26						190406 Ctrl DMSO Inhibitor C1 DAPI C2 BF C3 Factin C4 Gata3 C5 Pard6.lif - Inhibitor/101:0163-0641-0310:c:3/5 z:33/61 - Inhibitor/101	30.87	42.27	2.48952	1.87035				220120 C1-PARD6B C2-GATA3 C3-DAPI BF C4-FACTIN 7.5uM U73122 treatment DMSO media ctrl.lif - U73122 7.5uM/195:0170-0551-0419:c:5/5 z:34/76 - U73122 7.5uM/195	45.82	26.22
180914 2 9 24h Par6.lif - 24h/6:0367-0401-0295:c:3/4 z:96/133 - 24h/6	24.88	35.31	1.69022													apical		22.61		0.662467				190406 Ctrl DMSO Inhibitor C1 DAPI C2 BF C3 Factin C4 Gata3 C5 Pard6.lif - Inhibitor/101:0163-0669-0311:c:3/5 z:33/61 - Inhibitor/101	17.02	26.97						220120 C1-PARD6B C2-GATA3 C3-DAPI BF C4-FACTIN 7.5uM U73122 treatment DMSO media ctrl.lif - U73122 7.5uM/195:0170-0407-0470:c:5/5 z:34/76 - U73122 7.5uM/195	63.46	59.95	2.90568	1.23149
180914 2 9 24h Par6.lif - 24h/6:0367-0396-0294:c:3/4 z:96/133 - 24h/6	9.79	41.95														cytoplasm		20.75						190406 Ctrl DMSO Inhibitor C1 DAPI C2 BF C3 Factin C4 Gata3 C5 Pard6.lif - Inhibitor/101:0163-0652-0385:c:3/5 z:33/61 - Inhibitor/101	12.4	22.6						220120 C1-PARD6B C2-GATA3 C3-DAPI BF C4-FACTIN 7.5uM U73122 treatment DMSO media ctrl.lif - U73122 7.5uM/195:0170-0459-0492:c:5/5 z:34/76 - U73122 7.5uM/195	7.43	51.54
180914 2 9 24h Par6.lif - 24h/6:0367-0372-0295:c:3/4 z:96/133 - 24h/6	14.72															basal		34.13						190406 Ctrl DMSO Inhibitor C1 DAPI C2 BF C3 Factin C4 Gata3 C5 Pard6.lif - Inhibitor/101:0113-0299-0336:c:3/5 z:21/61 - Inhibitor/101	12.75	29.12	0.468406	0.859504				220120 C1-PARD6B C2-GATA3 C3-DAPI BF C4-FACTIN 7.5uM U73122 treatment DMSO media ctrl.lif - U73122 7.5uM/195:0170-0461-0529:c:5/5 z:34/76 - U73122 7.5uM/195	21.84	22.04
180914 2 9 24h Par6.lif - 24h/6:0427-0192-0189:c:3/4 z:106/133 - 24h/6	39.65		4.7485													Embryo 216								190406 Ctrl DMSO Inhibitor C1 DAPI C2 BF C3 Factin C4 Gata3 C5 Pard6.lif - Inhibitor/101:0113-0366-0397:c:3/5 z:21/61 - Inhibitor/101	28.43	31.22						220120 C1-PARD6B C2-GATA3 C3-DAPI BF C4-FACTIN 7.5uM U73122 treatment DMSO media ctrl.lif - U73122 7.5uM/195:0170-0447-0605:c:5/5 z:34/76 - U73122 7.5uM/195	95.38	51.31	2.36616	1.62878
180914 2 9 24h Par6.lif - 24h/6:0427-0203-0193:c:3/4 z:106/133 - 24h/6	6.01															220120 C1-PARD6B C2-GATA3 C3-DAPI BF C4-FACTIN 7.5uM U73122 treatment DMSO media ctrl.lif - DMSO/216:0205-0472-0378:c:5/5 z:41/85 - DMSO/216	64.7	63.27	1.80726	1.63067	2.09412	1.67736		190406 Ctrl DMSO Inhibitor C1 DAPI C2 BF C3 Factin C4 Gata3 C5 Pard6.lif - Inhibitor/101:0113-0393-0348:c:3/5 z:21/61 - Inhibitor/101	27.22	33.88						220120 C1-PARD6B C2-GATA3 C3-DAPI BF C4-FACTIN 7.5uM U73122 treatment DMSO media ctrl.lif - U73122 7.5uM/195:0170-0457-0594:c:5/5 z:34/76 - U73122 7.5uM/195	41.97	12.64
180914 2 9 24h Par6.lif - 24h/6:0427-0214-0223:c:3/4 z:106/133 - 24h/6	8.35															220120 C1-PARD6B C2-GATA3 C3-DAPI BF C4-FACTIN 7.5uM U73122 treatment DMSO media ctrl.lif - DMSO/216:0205-0493-0410:c:5/5 z:41/85 - DMSO/216	45.7	42.37						190406 Ctrl DMSO Inhibitor C1 DAPI C2 BF C3 Factin C4 Gata3 C5 Pard6.lif - Inhibitor/101:0113-0440-0592:c:3/5 z:21/61 - Inhibitor/101	39.64	42.22	2.03909	1.16565				220120 C1-PARD6B C2-GATA3 C3-DAPI BF C4-FACTIN 7.5uM U73122 treatment DMSO media ctrl.lif - U73122 7.5uM/195:0170-0508-0625:c:5/5 z:34/76 - U73122 7.5uM/195	40.31	24.44
Embryo 4																220120 C1-PARD6B C2-GATA3 C3-DAPI BF C4-FACTIN 7.5uM U73122 treatment DMSO media ctrl.lif - DMSO/216:0205-0570-0385:c:5/5 z:41/85 - DMSO/216	35.8	38.8						190406 Ctrl DMSO Inhibitor C1 DAPI C2 BF C3 Factin C4 Gata3 C5 Pard6.lif - Inhibitor/101:0113-0439-0562:c:3/5 z:21/61 - Inhibitor/101	17.92	34.43						220120 C1-PARD6B C2-GATA3 C3-DAPI BF C4-FACTIN 7.5uM U73122 treatment DMSO media ctrl.lif - U73122 7.5uM/195:0170-0567-0717:c:5/5 z:34/76 - U73122 7.5uM/195	76.25	40.91	2.26597	0.773995
180914 2 9 24h Par6.lif - 24h/4:0423-0265-0124:c:3/4 z:106/133 - 24h/4	39.8	69.36	2.90299	1.53928	3.97129	1.72424										220120 C1-PARD6B C2-GATA3 C3-DAPI BF C4-FACTIN 7.5uM U73122 treatment DMSO media ctrl.lif - DMSO/216:0205-0649-0355:c:5/5 z:41/85 - DMSO/216	66.49	72.79	1.93341	1.60013				190406 Ctrl DMSO Inhibitor C1 DAPI C2 BF C3 Factin C4 Gata3 C5 Pard6.lif - Inhibitor/101:0113-0383-0425:c:3/5 z:21/61 - Inhibitor/101	19.44	36.22						220120 C1-PARD6B C2-GATA3 C3-DAPI BF C4-FACTIN 7.5uM U73122 treatment DMSO media ctrl.lif - U73122 7.5uM/195:0170-0563-0662:c:5/5 z:34/76 - U73122 7.5uM/195	39.49	24.8
180914 2 9 24h Par6.lif - 24h/4:0423-0278-0146:c:3/4 z:106/133 - 24h/4	32.33	29.73														220120 C1-PARD6B C2-GATA3 C3-DAPI BF C4-FACTIN 7.5uM U73122 treatment DMSO media ctrl.lif - DMSO/216:0205-0666-0388:c:5/5 z:41/85 - DMSO/216	34.64	41.73						190406 Ctrl DMSO Inhibitor C1 DAPI C2 BF C3 Factin C4 Gata3 C5 Pard6.lif - Inhibitor/101:0113-0501-0222:c:3/5 z:21/61 - Inhibitor/101	24.36	25.69	1.12621	1.48841				220120 C1-PARD6B C2-GATA3 C3-DAPI BF C4-FACTIN 7.5uM U73122 treatment DMSO media ctrl.lif - U73122 7.5uM/195:0170-0584-0639:c:5/5 z:34/76 - U73122 7.5uM/195	33.65	17.4
180914 2 9 24h Par6.lif - 24h/4:0423-0235-0170:c:3/4 z:106/133 - 24h/4	13.71	45.06														220120 C1-PARD6B C2-GATA3 C3-DAPI BF C4-FACTIN 7.5uM U73122 treatment DMSO media ctrl.lif - DMSO/216:0205-0671-0460:c:5/5 z:41/85 - DMSO/216	34.39	45.49						190406 Ctrl DMSO Inhibitor C1 DAPI C2 BF C3 Factin C4 Gata3 C5 Pard6.lif - Inhibitor/101:0113-0540-0267:c:3/5 z:21/61 - Inhibitor/101	20.58	19.49						220120 C1-PARD6B C2-GATA3 C3-DAPI BF C4-FACTIN 7.5uM U73122 treatment DMSO media ctrl.lif - U73122 7.5uM/195:0170-0728-0697:c:5/5 z:34/76 - U73122 7.5uM/195	78.62	45.71	1.95087	2.03086
180914 2 9 24h Par6.lif - 24h/4:0423-0189-0153:c:3/4 z:106/133 - 24h/4	60.79	77.9	2.28534	2.65146												220120 C1-PARD6B C2-GATA3 C3-DAPI BF C4-FACTIN 7.5uM U73122 treatment DMSO media ctrl.lif - DMSO/216:0170-0373-0468:c:5/5 z:31/85 - DMSO/216	97.1	67.3	1.89611	1.66832				190406 Ctrl DMSO Inhibitor C1 DAPI C2 BF C3 Factin C4 Gata3 C5 Pard6.lif - Inhibitor/101:0113-0482-0326:c:3/5 z:21/61 - Inhibitor/101	21.63	17.26						220120 C1-PARD6B C2-GATA3 C3-DAPI BF C4-FACTIN 7.5uM U73122 treatment DMSO media ctrl.lif - U73122 7.5uM/195:0170-0713-0686:c:5/5 z:34/76 - U73122 7.5uM/195	29.58	57.82
180914 2 9 24h Par6.lif - 24h/4:0423-0187-0170:c:3/4 z:106/133 - 24h/4	43.02	35.15														220120 C1-PARD6B C2-GATA3 C3-DAPI BF C4-FACTIN 7.5uM U73122 treatment DMSO media ctrl.lif - DMSO/216:0170-0412-0502:c:5/5 z:31/85 - DMSO/216	23.77	36.27						190406 Ctrl DMSO Inhibitor C1 DAPI C2 BF C3 Factin C4 Gata3 C5 Pard6.lif - Inhibitor/101:0113-0599-0551:c:3/5 z:21/61 - Inhibitor/101	57.6		2.62654					220120 C1-PARD6B C2-GATA3 C3-DAPI BF C4-FACTIN 7.5uM U73122 treatment DMSO media ctrl.lif - U73122 7.5uM/195:0170-0732-0645:c:5/5 z:34/76 - U73122 7.5uM/195	40.3	23.38
180914 2 9 24h Par6.lif - 24h/4:0423-0163-0207:c:3/4 z:106/133 - 24h/4	26.6	29.38														220120 C1-PARD6B C2-GATA3 C3-DAPI BF C4-FACTIN 7.5uM U73122 treatment DMSO media ctrl.lif - DMSO/216:0170-0446-0460:c:5/5 z:31/85 - DMSO/216	51.21	40.34						190406 Ctrl DMSO Inhibitor C1 DAPI C2 BF C3 Factin C4 Gata3 C5 Pard6.lif - Inhibitor/101:0113-0593-0486:c:3/5 z:21/61 - Inhibitor/101	25.78							220120 C1-PARD6B C2-GATA3 C3-DAPI BF C4-FACTIN 7.5uM U73122 treatment DMSO media ctrl.lif - U73122 7.5uM/195:0170-0819-0585:c:5/5 z:34/76 - U73122 7.5uM/195	106.62	35.11	2.00829	1.60876
180914 2 9 24h Par6.lif - 24h/4:0383-0155-0209:c:3/4 z:95/133 - 24h/4	36.47	54.77	5.30859	1.9157												220120 C1-PARD6B C2-GATA3 C3-DAPI BF C4-FACTIN 7.5uM U73122 treatment DMSO media ctrl.lif - DMSO/216:0170-0407-0394:c:5/5 z:31/85 - DMSO/216	97.38	52.09	1.86982	1.50942				190406 Ctrl DMSO Inhibitor C1 DAPI C2 BF C3 Factin C4 Gata3 C5 Pard6.lif - Inhibitor/101:0113-0486-0490:c:3/5 z:21/61 - Inhibitor/101	21.93							220120 C1-PARD6B C2-GATA3 C3-DAPI BF C4-FACTIN 7.5uM U73122 treatment DMSO media ctrl.lif - U73122 7.5uM/195:0170-0755-0577:c:5/5 z:34/76 - U73122 7.5uM/195	46.62	68.2
180914 2 9 24h Par6.lif - 24h/4:0383-0152-0220:c:3/4 z:95/133 - 24h/4	17.95	29.14														220120 C1-PARD6B C2-GATA3 C3-DAPI BF C4-FACTIN 7.5uM U73122 treatment DMSO media ctrl.lif - DMSO/216:0170-0468-0415:c:5/5 z:31/85 - DMSO/216	26.76	44.99						Embryo 130								220120 C1-PARD6B C2-GATA3 C3-DAPI BF C4-FACTIN 7.5uM U73122 treatment DMSO media ctrl.lif - U73122 7.5uM/195:0170-0758-0515:c:5/5 z:34/76 - U73122 7.5uM/195	53.09	22.24
180914 2 9 24h Par6.lif - 24h/4:0383-0153-0275:c:3/4 z:95/133 - 24h/4	6.87	28.59														220120 C1-PARD6B C2-GATA3 C3-DAPI BF C4-FACTIN 7.5uM U73122 treatment DMSO media ctrl.lif - DMSO/216:0170-0441-0460:c:5/5 z:31/85 - DMSO/216	52.08	34.51						190613 Media only DMSO inhibitor 5uM C1Factin C2Gata3 C3Pard6b C4 DAPI C5BF.lif - inhibitor 5uM/130:0116-0334-0489:c:1/5 z:24/78 - inhibitor 5uM/130	82.11	46.97	2.13051	0.762748	1.3899	0.945353		220120 C1-PARD6B C2-GATA3 C3-DAPI BF C4-FACTIN 7.5uM U73122 treatment DMSO media ctrl.lif - U73122 7.5uM/195:0170-0794-0435:c:5/5 z:34/76 - U73122 7.5uM/195	80.57	49.16	1.48735	1.14354
180914 2 9 24h Par6.lif - 24h/4:0383-0130-0305:c:3/4 z:95/133 - 24h/4	9.91	78.26	1.59839	1.77501												220120 C1-PARD6B C2-GATA3 C3-DAPI BF C4-FACTIN 7.5uM U73122 treatment DMSO media ctrl.lif - DMSO/216:0170-0669-0375:c:5/5 z:31/85 - DMSO/216	91.15	62.39	2.23133	1.7923				190613 Media only DMSO inhibitor 5uM C1Factin C2Gata3 C3Pard6b C4 DAPI C5BF.lif - inhibitor 5uM/130:0116-0346-0467:c:1/5 z:24/78 - inhibitor 5uM/130	69.9	47.52						220120 C1-PARD6B C2-GATA3 C3-DAPI BF C4-FACTIN 7.5uM U73122 treatment DMSO media ctrl.lif - U73122 7.5uM/195:0170-0766-0450:c:5/5 z:34/76 - U73122 7.5uM/195	35.84	53.81
180914 2 9 24h Par6.lif - 24h/4:0383-0144-0309:c:3/4 z:95/133 - 24h/4	19.34	36.61														220120 C1-PARD6B C2-GATA3 C3-DAPI BF C4-FACTIN 7.5uM U73122 treatment DMSO media ctrl.lif - DMSO/216:0170-0631-0353:c:5/5 z:31/85 - DMSO/216	38.92	31.09						190613 Media only DMSO inhibitor 5uM C1Factin C2Gata3 C3Pard6b C4 DAPI C5BF.lif - inhibitor 5uM/130:0116-0470-0396:c:1/5 z:24/78 - inhibitor 5uM/130	38.54	61.58						220120 C1-PARD6B C2-GATA3 C3-DAPI BF C4-FACTIN 7.5uM U73122 treatment DMSO media ctrl.lif - U73122 7.5uM/195:0170-0709-0412:c:5/5 z:34/76 - U73122 7.5uM/195	54.17	22.33
180914 2 9 24h Par6.lif - 24h/4:0383-0153-0272:c:3/4 z:95/133 - 24h/4	6.2	44.09														220120 C1-PARD6B C2-GATA3 C3-DAPI BF C4-FACTIN 7.5uM U73122 treatment DMSO media ctrl.lif - DMSO/216:0170-0647-0451:c:5/5 z:31/85 - DMSO/216	40.85	34.81						190613 Media only DMSO inhibitor 5uM C1Factin C2Gata3 C3Pard6b C4 DAPI C5BF.lif - inhibitor 5uM/130:0116-0501-0709:c:1/5 z:24/78 - inhibitor 5uM/130	77.88	49.95	0.962789	0.81845				apical		42.92		0.572
180914 2 9 24h Par6.lif - 24h/4:0383-0183-0344:c:3/4 z:95/133 - 24h/4	14.4	44.04	0.799556	1.29112												220120 C1-PARD6B C2-GATA3 C3-DAPI BF C4-FACTIN 7.5uM U73122 treatment DMSO media ctrl.lif - DMSO/216:0210-0537-0725:c:5/5 z:42/85 - DMSO/216	51.8	38.51	1.13896	1.11656				190613 Media only DMSO inhibitor 5uM C1Factin C2Gata3 C3Pard6b C4 DAPI C5BF.lif - inhibitor 5uM/130:0116-0468-0709:c:1/5 z:24/78 - inhibitor 5uM/130	70.91	33.34						cytoplasm		38.77
180914 2 9 24h Par6.lif - 24h/4:0383-0197-0368:c:3/4 z:95/133 - 24h/4	11.38	25.23														220120 C1-PARD6B C2-GATA3 C3-DAPI BF C4-FACTIN 7.5uM U73122 treatment DMSO media ctrl.lif - DMSO/216:0210-0514-0693:c:5/5 z:42/85 - DMSO/216	18.61	22.53						190613 Media only DMSO inhibitor 5uM C1Factin C2Gata3 C3Pard6b C4 DAPI C5BF.lif - inhibitor 5uM/130:0116-0579-0649:c:1/5 z:24/78 - inhibitor 5uM/130	80.89	61.03						basal		17.75
180914 2 9 24h Par6.lif - 24h/4:0383-0269-0350:c:3/4 z:95/133 - 24h/4	18.01	34.11														220120 C1-PARD6B C2-GATA3 C3-DAPI BF C4-FACTIN 7.5uM U73122 treatment DMSO media ctrl.lif - DMSO/216:0210-0582-0684:c:5/5 z:42/85 - DMSO/216	45.48	34.49						190613 Media only DMSO inhibitor 5uM C1Factin C2Gata3 C3Pard6b C4 DAPI C5BF.lif - inhibitor 5uM/130:0131-0784-0642:c:1/5 z:27/78 - inhibitor 5uM/130	88.58	43.76	1.85936	1.04364				Embryo 191
180914 2 9 24h Par6.lif - 24h/4:0383-0327-0333:c:3/4 z:95/133 - 24h/4	48.24	46.54	9.10189	1.17288												220120 C1-PARD6B C2-GATA3 C3-DAPI BF C4-FACTIN 7.5uM U73122 treatment DMSO media ctrl.lif - DMSO/216:0210-0404-0643:c:5/5 z:42/85 - DMSO/216	60.27	68.91	1.60592	2.18415				190613 Media only DMSO inhibitor 5uM C1Factin C2Gata3 C3Pard6b C4 DAPI C5BF.lif - inhibitor 5uM/130:0131-0782-0661:c:1/5 z:27/78 - inhibitor 5uM/130	37.38	34.88						220120 C1-PARD6B C2-GATA3 C3-DAPI BF C4-FACTIN 7.5uM U73122 treatment DMSO media ctrl.lif - U73122 7.5uM/191:0205-0690-0585:c:5/5 z:41/79 - U73122 7.5uM/191	36.29	63.05	1.14805	1.38134	1.285	1.23644
180914 2 9 24h Par6.lif - 24h/4:0383-0327-0336:c:3/4 z:95/133 - 24h/4	11.5	34.42														220120 C1-PARD6B C2-GATA3 C3-DAPI BF C4-FACTIN 7.5uM U73122 treatment DMSO media ctrl.lif - DMSO/216:0210-0400-0603:c:5/5 z:42/85 - DMSO/216	36.68	35.32						190613 Media only DMSO inhibitor 5uM C1Factin C2Gata3 C3Pard6b C4 DAPI C5BF.lif - inhibitor 5uM/130:0131-0658-0579:c:1/5 z:27/78 - inhibitor 5uM/130	47.64	41.93						220120 C1-PARD6B C2-GATA3 C3-DAPI BF C4-FACTIN 7.5uM U73122 treatment DMSO media ctrl.lif - U73122 7.5uM/191:0205-0649-0548:c:5/5 z:41/79 - U73122 7.5uM/191	47.96	65.06
180914 2 9 24h Par6.lif - 24h/4:0383-0321-0286:c:3/4 z:95/133 - 24h/4	5.3	39.68														220120 C1-PARD6B C2-GATA3 C3-DAPI BF C4-FACTIN 7.5uM U73122 treatment DMSO media ctrl.lif - DMSO/216:0210-0464-0634:c:5/5 z:42/85 - DMSO/216	37.53	31.55						190613 Media only DMSO inhibitor 5uM C1Factin C2Gata3 C3Pard6b C4 DAPI C5BF.lif - inhibitor 5uM/130:0106-0623-0338:c:1/5 z:23/78 - inhibitor 5uM/130	67.13	48.31	0.941515	1.15657				220120 C1-PARD6B C2-GATA3 C3-DAPI BF C4-FACTIN 7.5uM U73122 treatment DMSO media ctrl.lif - U73122 7.5uM/191:0205-0639-0494:c:5/5 z:41/79 - U73122 7.5uM/191	31.61	63.38
180914 2 9 24h Par6.lif - 24h/4:0383-0354-0194:c:3/4 z:95/133 - 24h/4	36.15		3.53372													220120 C1-PARD6B C2-GATA3 C3-DAPI BF C4-FACTIN 7.5uM U73122 treatment DMSO media ctrl.lif - DMSO/216:0170-0743-0616:c:5/5 z:34/85 - DMSO/216	131.33	69.83	3.6209	1.91735				190613 Media only DMSO inhibitor 5uM C1Factin C2Gata3 C3Pard6b C4 DAPI C5BF.lif - inhibitor 5uM/130:0106-0615-0306:c:1/5 z:23/78 - inhibitor 5uM/130	41.7	48.54						220120 C1-PARD6B C2-GATA3 C3-DAPI BF C4-FACTIN 7.5uM U73122 treatment DMSO media ctrl.lif - U73122 7.5uM/191:0205-0462-0282:c:5/5 z:41/79 - U73122 7.5uM/191	35.32	53.6	1.05339	1.38245
180914 2 9 24h Par6.lif - 24h/4:0383-0363-0205:c:3/4 z:95/133 - 24h/4	10.36															220120 C1-PARD6B C2-GATA3 C3-DAPI BF C4-FACTIN 7.5uM U73122 treatment DMSO media ctrl.lif - DMSO/216:0170-0654-0603:c:5/5 z:34/85 - DMSO/216	28.75	35.71						190613 Media only DMSO inhibitor 5uM C1Factin C2Gata3 C3Pard6b C4 DAPI C5BF.lif - inhibitor 5uM/130:0106-0475-0407:c:1/5 z:23/78 - inhibitor 5uM/130	71.3	41.77						220120 C1-PARD6B C2-GATA3 C3-DAPI BF C4-FACTIN 7.5uM U73122 treatment DMSO media ctrl.lif - U73122 7.5uM/191:0205-0510-0320:c:5/5 z:41/79 - U73122 7.5uM/191	49.54	48.79
180914 2 9 24h Par6.lif - 24h/4:0383-0340-0239:c:3/4 z:95/133 - 24h/4	10.23															220120 C1-PARD6B C2-GATA3 C3-DAPI BF C4-FACTIN 7.5uM U73122 treatment DMSO media ctrl.lif - DMSO/216:0170-0673-0555:c:5/5 z:34/85 - DMSO/216	36.27	36.42						190613 Media only DMSO inhibitor 5uM C1Factin C2Gata3 C3Pard6b C4 DAPI C5BF.lif - inhibitor 5uM/130:0106-0340-0484:c:1/5 z:23/78 - inhibitor 5uM/130	89.5		1.0553					220120 C1-PARD6B C2-GATA3 C3-DAPI BF C4-FACTIN 7.5uM U73122 treatment DMSO media ctrl.lif - U73122 7.5uM/191:0205-0442-0372:c:5/5 z:41/79 - U73122 7.5uM/191	33.53	45.18
180914 2 9 24h Par6.lif - 24h/4:0383-0368-0273:c:3/4 z:95/133 - 24h/4	53.85		6.23986													220120 C1-PARD6B C2-GATA3 C3-DAPI BF C4-FACTIN 7.5uM U73122 treatment DMSO media ctrl.lif - DMSO/216:0170-0677-0365:c:5/5 z:34/85 - DMSO/216	127.98		2.74341					190613 Media only DMSO inhibitor 5uM C1Factin C2Gata3 C3Pard6b C4 DAPI C5BF.lif - inhibitor 5uM/130:0106-0392-0463:c:1/5 z:23/78 - inhibitor 5uM/130	70.69							220120 C1-PARD6B C2-GATA3 C3-DAPI BF C4-FACTIN 7.5uM U73122 treatment DMSO media ctrl.lif - U73122 7.5uM/191:0205-0356-0359:c:5/5 z:41/79 - U73122 7.5uM/191	38.13	63.79	1.04095	1.00131
180914 2 9 24h Par6.lif - 24h/4:0383-0363-0266:c:3/4 z:95/133 - 24h/4	17.6															220120 C1-PARD6B C2-GATA3 C3-DAPI BF C4-FACTIN 7.5uM U73122 treatment DMSO media ctrl.lif - DMSO/216:0170-0687-0406:c:5/5 z:34/85 - DMSO/216	38.59							190613 Media only DMSO inhibitor 5uM C1Factin C2Gata3 C3Pard6b C4 DAPI C5BF.lif - inhibitor 5uM/130:0106-0474-0402:c:1/5 z:23/78 - inhibitor 5uM/130	84.81							220120 C1-PARD6B C2-GATA3 C3-DAPI BF C4-FACTIN 7.5uM U73122 treatment DMSO media ctrl.lif - U73122 7.5uM/191:0205-0383-0377:c:5/5 z:41/79 - U73122 7.5uM/191	26.98	29.33
180914 2 9 24h Par6.lif - 24h/4:0383-0332-0241:c:3/4 z:95/133 - 24h/4	8.63															220120 C1-PARD6B C2-GATA3 C3-DAPI BF C4-FACTIN 7.5uM U73122 treatment DMSO media ctrl.lif - DMSO/216:0170-0666-0466:c:5/5 z:34/85 - DMSO/216	46.65							Embryo 129								220120 C1-PARD6B C2-GATA3 C3-DAPI BF C4-FACTIN 7.5uM U73122 treatment DMSO media ctrl.lif - U73122 7.5uM/191:0205-0436-0363:c:5/5 z:41/79 - U73122 7.5uM/191	36.63	39.87
Embryo 87																Embryo 214								190613 Media only DMSO inhibitor 5uM C1Factin C2Gata3 C3Pard6b C4 DAPI C5BF.lif - inhibitor 5uM/129:0176-0432-0720:c:1/5 z:36/78 - inhibitor 5uM/129	113.07	75.11	1.42928	1.47971	2.13956	1.63232		220120 C1-PARD6B C2-GATA3 C3-DAPI BF C4-FACTIN 7.5uM U73122 treatment DMSO media ctrl.lif - U73122 7.5uM/191:0265-0444-0580:c:5/5 z:53/79 - U73122 7.5uM/191	33.69	63.56	1.59366	1.08141
20181227 c1 phalloidin c2 pard6 c3 gata3.lif - control inhibitor/87:0193-0207-0616:c:3/5 z:39/71 - control inhibitor/87	36.47	40.85	1.77729	1.52825	1.70485	1.35802										220120 C1-PARD6B C2-GATA3 C3-DAPI BF C4-FACTIN 7.5uM U73122 treatment DMSO media ctrl.lif - DMSO/214:0230-0239-0619:c:5/5 z:46/104 - DMSO/214	56.82	136.23	3.13058	3.71705	2.91927	2.20958		190613 Media only DMSO inhibitor 5uM C1Factin C2Gata3 C3Pard6b C4 DAPI C5BF.lif - inhibitor 5uM/129:0176-0417-0648:c:1/5 z:36/78 - inhibitor 5uM/129	27.91	37.72						220120 C1-PARD6B C2-GATA3 C3-DAPI BF C4-FACTIN 7.5uM U73122 treatment DMSO media ctrl.lif - U73122 7.5uM/191:0265-0473-0567:c:5/5 z:53/79 - U73122 7.5uM/191	18.3	63.97
20181227 c1 phalloidin c2 pard6 c3 gata3.lif - control inhibitor/87:0193-0206-0585:c:3/5 z:39/71 - control inhibitor/87	20.31	26.07														220120 C1-PARD6B C2-GATA3 C3-DAPI BF C4-FACTIN 7.5uM U73122 treatment DMSO media ctrl.lif - DMSO/214:0230-0273-0600:c:5/5 z:46/104 - DMSO/214	11.62	30.26						190613 Media only DMSO inhibitor 5uM C1Factin C2Gata3 C3Pard6b C4 DAPI C5BF.lif - inhibitor 5uM/129:0176-0453-0599:c:1/5 z:36/78 - inhibitor 5uM/129	79.11	50.76						220120 C1-PARD6B C2-GATA3 C3-DAPI BF C4-FACTIN 7.5uM U73122 treatment DMSO media ctrl.lif - U73122 7.5uM/191:0265-0433-0497:c:5/5 z:53/79 - U73122 7.5uM/191	21.14	40.45
20181227 c1 phalloidin c2 pard6 c3 gata3.lif - control inhibitor/87:0193-0178-0516:c:3/5 z:39/71 - control inhibitor/87	20.52	26.73														220120 C1-PARD6B C2-GATA3 C3-DAPI BF C4-FACTIN 7.5uM U73122 treatment DMSO media ctrl.lif - DMSO/214:0230-0273-0678:c:5/5 z:46/104 - DMSO/214	18.15	36.65						190613 Media only DMSO inhibitor 5uM C1Factin C2Gata3 C3Pard6b C4 DAPI C5BF.lif - inhibitor 5uM/129:0186-0447-0731:c:1/5 z:38/78 - inhibitor 5uM/129	106	95.6	1.95248	2.91197				220120 C1-PARD6B C2-GATA3 C3-DAPI BF C4-FACTIN 7.5uM U73122 treatment DMSO media ctrl.lif - U73122 7.5uM/191:0265-0471-0293:c:5/5 z:53/79 - U73122 7.5uM/191	35.99	81.12	1.58896	1.12714
20181227 c1 phalloidin c2 pard6 c3 gata3.lif - control inhibitor/87:0193-0178-0394:c:3/5 z:39/71 - control inhibitor/87	35.69	39.62	2.52048	1.17811												220120 C1-PARD6B C2-GATA3 C3-DAPI BF C4-FACTIN 7.5uM U73122 treatment DMSO media ctrl.lif - DMSO/214:0230-0277-0719:c:5/5 z:46/104 - DMSO/214	30.47	140.12	1.60592	2.98191				190613 Media only DMSO inhibitor 5uM C1Factin C2Gata3 C3Pard6b C4 DAPI C5BF.lif - inhibitor 5uM/129:0186-0437-0661:c:1/5 z:38/78 - inhibitor 5uM/129	28.59	66.93						220120 C1-PARD6B C2-GATA3 C3-DAPI BF C4-FACTIN 7.5uM U73122 treatment DMSO media ctrl.lif - U73122 7.5uM/191:0265-0500-0304:c:5/5 z:53/79 - U73122 7.5uM/191	32.35	63.73
20181227 c1 phalloidin c2 pard6 c3 gata3.lif - control inhibitor/87:0193-0177-0481:c:3/5 z:39/71 - control inhibitor/87	15.29	31.5														220120 C1-PARD6B C2-GATA3 C3-DAPI BF C4-FACTIN 7.5uM U73122 treatment DMSO media ctrl.lif - DMSO/214:0230-0300-0724:c:5/5 z:46/104 - DMSO/214	19.01	41.69						190613 Media only DMSO inhibitor 5uM C1Factin C2Gata3 C3Pard6b C4 DAPI C5BF.lif - inhibitor 5uM/129:0186-0344-0660:c:1/5 z:38/78 - inhibitor 5uM/129	54.29	32.83						220120 C1-PARD6B C2-GATA3 C3-DAPI BF C4-FACTIN 7.5uM U73122 treatment DMSO media ctrl.lif - U73122 7.5uM/191:0265-0451-0375:c:5/5 z:53/79 - U73122 7.5uM/191	22.65	28.65
20181227 c1 phalloidin c2 pard6 c3 gata3.lif - control inhibitor/87:0193-0183-0507:c:3/5 z:39/71 - control inhibitor/87	14.16	33.63														220120 C1-PARD6B C2-GATA3 C3-DAPI BF C4-FACTIN 7.5uM U73122 treatment DMSO media ctrl.lif - DMSO/214:0230-0332-0740:c:5/5 z:46/104 - DMSO/214	20.06	46.99						190613 Media only DMSO inhibitor 5uM C1Factin C2Gata3 C3Pard6b C4 DAPI C5BF.lif - inhibitor 5uM/129:0186-0622-0579:c:1/5 z:38/78 - inhibitor 5uM/129	101.16	41.43	3.03693	0.846547				apical		61.43		1.70757
20181227 c1 phalloidin c2 pard6 c3 gata3.lif - control inhibitor/87:0193-0361-0720:c:3/5 z:39/71 - control inhibitor/87	45.51	36.69	2.07335	1.33418												220120 C1-PARD6B C2-GATA3 C3-DAPI BF C4-FACTIN 7.5uM U73122 treatment DMSO media ctrl.lif - DMSO/214:0230-0373-0787:c:5/5 z:46/104 - DMSO/214	33.78	115.84	4.36999	3.1048				190613 Media only DMSO inhibitor 5uM C1Factin C2Gata3 C3Pard6b C4 DAPI C5BF.lif - inhibitor 5uM/129:0186-0529-0490:c:1/5 z:38/78 - inhibitor 5uM/129	34.64	47.62						cytoplasm		48.95
20181227 c1 phalloidin c2 pard6 c3 gata3.lif - control inhibitor/87:0193-0380-0633:c:3/5 z:39/71 - control inhibitor/87	22.92	28.47														220120 C1-PARD6B C2-GATA3 C3-DAPI BF C4-FACTIN 7.5uM U73122 treatment DMSO media ctrl.lif - DMSO/214:0230-0403-0783:c:5/5 z:46/104 - DMSO/214	17.14	33.11						190613 Media only DMSO inhibitor 5uM C1Factin C2Gata3 C3Pard6b C4 DAPI C5BF.lif - inhibitor 5uM/129:0186-0535-0466:c:1/5 z:38/78 - inhibitor 5uM/129	33.31	48.94						basal		45.13
20181227 c1 phalloidin c2 pard6 c3 gata3.lif - control inhibitor/87:0193-0286-0614:c:3/5 z:39/71 - control inhibitor/87	21.95	27.5														220120 C1-PARD6B C2-GATA3 C3-DAPI BF C4-FACTIN 7.5uM U73122 treatment DMSO media ctrl.lif - DMSO/214:0230-0431-0790:c:5/5 z:46/104 - DMSO/214	7.73	37.31						apical		70.97		1.29107				apical		65.63		1.15426
20181227 c1 phalloidin c2 pard6 c3 gata3.lif - control inhibitor/87:0193-0619-0550:c:3/5 z:39/71 - control inhibitor/87	47.83	30.7	1.3054	1.20439												220120 C1-PARD6B C2-GATA3 C3-DAPI BF C4-FACTIN 7.5uM U73122 treatment DMSO media ctrl.lif - DMSO/214:0230-0723-0626:c:5/5 z:46/104 - DMSO/214	58.56	88.22	4.5643	1.31632				cytoplasm		44.49						cytoplasm		45.91
20181227 c1 phalloidin c2 pard6 c3 gata3.lif - control inhibitor/87:0193-0604-0584:c:3/5 z:39/71 - control inhibitor/87	26.67	20.79														220120 C1-PARD6B C2-GATA3 C3-DAPI BF C4-FACTIN 7.5uM U73122 treatment DMSO media ctrl.lif - DMSO/214:0230-0702-0626:c:5/5 z:46/104 - DMSO/214	23.16	45.23						basal		54.97						basal		31.25
20181227 c1 phalloidin c2 pard6 c3 gata3.lif - control inhibitor/87:0193-0613-0420:c:3/5 z:39/71 - control inhibitor/87	36.64	25.49														220120 C1-PARD6B C2-GATA3 C3-DAPI BF C4-FACTIN 7.5uM U73122 treatment DMSO media ctrl.lif - DMSO/214:0230-0695-0582:c:5/5 z:46/104 - DMSO/214	12.83	67.02						Embryo 128								apical		57.17		1.05607
20181227 c1 phalloidin c2 pard6 c3 gata3.lif - control inhibitor/87:0193-0607-0329:c:3/5 z:39/71 - control inhibitor/87	46.02	48.15	0.95955	1.84553												220120 C1-PARD6B C2-GATA3 C3-DAPI BF C4-FACTIN 7.5uM U73122 treatment DMSO media ctrl.lif - DMSO/214:0230-0666-0721:c:5/5 z:46/104 - DMSO/214	58.23	66.1	2.18663	1.0861				190613 Media only DMSO inhibitor 5uM C1Factin C2Gata3 C3Pard6b C4 DAPI C5BF.lif - inhibitor 5uM/128:0216-0294-0578:c:1/5 z:44/78 - inhibitor 5uM/128	90.28	55.07	1.47012	2.32854	1.34715	1.52101		cytoplasm		69.62
20181227 c1 phalloidin c2 pard6 c3 gata3.lif - control inhibitor/87:0193-0571-0271:c:3/5 z:39/71 - control inhibitor/87	26.25	24.98														220120 C1-PARD6B C2-GATA3 C3-DAPI BF C4-FACTIN 7.5uM U73122 treatment DMSO media ctrl.lif - DMSO/214:0230-0655-0722:c:5/5 z:46/104 - DMSO/214	20.36	36.33						190613 Media only DMSO inhibitor 5uM C1Factin C2Gata3 C3Pard6b C4 DAPI C5BF.lif - inhibitor 5uM/128:0216-0294-0528:c:1/5 z:44/78 - inhibitor 5uM/128	71.02	51.01						basal		27.74
20181227 c1 phalloidin c2 pard6 c3 gata3.lif - control inhibitor/87:0193-0508-0265:c:3/5 z:39/71 - control inhibitor/87	47.96	26.09														220120 C1-PARD6B C2-GATA3 C3-DAPI BF C4-FACTIN 7.5uM U73122 treatment DMSO media ctrl.lif - DMSO/214:0230-0591-0752:c:5/5 z:46/104 - DMSO/214	26.63	60.86						190613 Media only DMSO inhibitor 5uM C1Factin C2Gata3 C3Pard6b C4 DAPI C5BF.lif - inhibitor 5uM/128:0216-0430-0622:c:1/5 z:44/78 - inhibitor 5uM/128	61.41	23.65						Embryo 194
20181227 c1 phalloidin c2 pard6 c3 gata3.lif - control inhibitor/87:0193-0400-0233:c:3/5 z:39/71 - control inhibitor/87	38.36	38.21	1.59302	1.0852												220120 C1-PARD6B C2-GATA3 C3-DAPI BF C4-FACTIN 7.5uM U73122 treatment DMSO media ctrl.lif - DMSO/214:0230-0541-0801:c:5/5 z:46/104 - DMSO/214	42.98	42.21	1.65818	1.05131				190613 Media only DMSO inhibitor 5uM C1Factin C2Gata3 C3Pard6b C4 DAPI C5BF.lif - inhibitor 5uM/128:0216-0530-0837:c:1/5 z:44/78 - inhibitor 5uM/128	85.8	60.53	1.27281	1.55404				220120 C1-PARD6B C2-GATA3 C3-DAPI BF C4-FACTIN 7.5uM U73122 treatment DMSO media ctrl.lif - U73122 7.5uM/194:0130-0493-0714:c:5/5 z:26/78 - U73122 7.5uM/194	50.96	41.84	1.49706	0.785659	1.20394	0.797417
20181227 c1 phalloidin c2 pard6 c3 gata3.lif - control inhibitor/87:0193-0380-0225:c:3/5 z:39/71 - control inhibitor/87	31.86	27.59														220120 C1-PARD6B C2-GATA3 C3-DAPI BF C4-FACTIN 7.5uM U73122 treatment DMSO media ctrl.lif - DMSO/214:0230-0548-0767:c:5/5 z:46/104 - DMSO/214	19.98	16.58						190613 Media only DMSO inhibitor 5uM C1Factin C2Gata3 C3Pard6b C4 DAPI C5BF.lif - inhibitor 5uM/128:0216-0563-0809:c:1/5 z:44/78 - inhibitor 5uM/128	67.35	57.42						220120 C1-PARD6B C2-GATA3 C3-DAPI BF C4-FACTIN 7.5uM U73122 treatment DMSO media ctrl.lif - U73122 7.5uM/194:0130-0492-0680:c:5/5 z:26/78 - U73122 7.5uM/194	38.71	31.12
20181227 c1 phalloidin c2 pard6 c3 gata3.lif - control inhibitor/87:0193-0309-0318:c:3/5 z:39/71 - control inhibitor/87	24.08	35.21														220120 C1-PARD6B C2-GATA3 C3-DAPI BF C4-FACTIN 7.5uM U73122 treatment DMSO media ctrl.lif - DMSO/214:0230-0591-0753:c:5/5 z:46/104 - DMSO/214	25.92	40.15						190613 Media only DMSO inhibitor 5uM C1Factin C2Gata3 C3Pard6b C4 DAPI C5BF.lif - inhibitor 5uM/128:0216-0633-0737:c:1/5 z:44/78 - inhibitor 5uM/128	67.41	38.95						220120 C1-PARD6B C2-GATA3 C3-DAPI BF C4-FACTIN 7.5uM U73122 treatment DMSO media ctrl.lif - U73122 7.5uM/194:0130-0497-0610:c:5/5 z:26/78 - U73122 7.5uM/194	34.04	16.95
apical		41.47		1.33045												Embryo 213								190613 Media only DMSO inhibitor 5uM C1Factin C2Gata3 C3Pard6b C4 DAPI C5BF.lif - inhibitor 5uM/128:0216-0798-0669:c:1/5 z:44/78 - inhibitor 5uM/128	81.36	30.52	1.50974	1.36984				220120 C1-PARD6B C2-GATA3 C3-DAPI BF C4-FACTIN 7.5uM U73122 treatment DMSO media ctrl.lif - U73122 7.5uM/194:0110-0343-0600:c:5/5 z:22/78 - U73122 7.5uM/194	38.41	61.59	1.03364	0.742818
cytoplasm		30.5														220120 C1-PARD6B C2-GATA3 C3-DAPI BF C4-FACTIN 7.5uM U73122 treatment DMSO media ctrl.lif - DMSO/213:0180-0686-0472:c:5/5 z:36/76 - DMSO/213	51.5	45.42	0.791334	0.996708	1.08713	1.01945		190613 Media only DMSO inhibitor 5uM C1Factin C2Gata3 C3Pard6b C4 DAPI C5BF.lif - inhibitor 5uM/128:0216-0769-0708:c:1/5 z:44/78 - inhibitor 5uM/128	62.2	29.87						220120 C1-PARD6B C2-GATA3 C3-DAPI BF C4-FACTIN 7.5uM U73122 treatment DMSO media ctrl.lif - U73122 7.5uM/194:0110-0362-0604:c:5/5 z:22/78 - U73122 7.5uM/194	64.43	26.42
basal		31.17														220120 C1-PARD6B C2-GATA3 C3-DAPI BF C4-FACTIN 7.5uM U73122 treatment DMSO media ctrl.lif - DMSO/213:0180-0675-0493:c:5/5 z:36/76 - DMSO/213	61.78	42.66						190613 Media only DMSO inhibitor 5uM C1Factin C2Gata3 C3Pard6b C4 DAPI C5BF.lif - inhibitor 5uM/128:0216-0722-0538:c:1/5 z:44/78 - inhibitor 5uM/128	53.89	22.28						220120 C1-PARD6B C2-GATA3 C3-DAPI BF C4-FACTIN 7.5uM U73122 treatment DMSO media ctrl.lif - U73122 7.5uM/194:0110-0415-0596:c:5/5 z:22/78 - U73122 7.5uM/194	37.16	13.23
Embryo 84																220120 C1-PARD6B C2-GATA3 C3-DAPI BF C4-FACTIN 7.5uM U73122 treatment DMSO media ctrl.lif - DMSO/213:0180-0643-0536:c:5/5 z:36/76 - DMSO/213	65.08	45.57						190613 Media only DMSO inhibitor 5uM C1Factin C2Gata3 C3Pard6b C4 DAPI C5BF.lif - inhibitor 5uM/128:0216-0668-0320:c:1/5 z:44/78 - inhibitor 5uM/128	64.35	55.07	1.13592	0.831622				220120 C1-PARD6B C2-GATA3 C3-DAPI BF C4-FACTIN 7.5uM U73122 treatment DMSO media ctrl.lif - U73122 7.5uM/194:0100-0366-0425:c:5/5 z:20/78 - U73122 7.5uM/194	51.67	64.96	0.868112	0.786984
20181227 c1 phalloidin c2 pard6 c3 gata3.lif - control inhibitor/84:0208-0272-0368:c:3/5 z:42/73 - control inhibitor/84	45.57	22.63	1.05657	0.842831	1.19869	0.923733										220120 C1-PARD6B C2-GATA3 C3-DAPI BF C4-FACTIN 7.5uM U73122 treatment DMSO media ctrl.lif - DMSO/213:0180-0722-0620:c:5/5 z:36/76 - DMSO/213	58.94	55.49	0.964648	1.22657				190613 Media only DMSO inhibitor 5uM C1Factin C2Gata3 C3Pard6b C4 DAPI C5BF.lif - inhibitor 5uM/128:0216-0805-0426:c:1/5 z:44/78 - inhibitor 5uM/128	54.77	63.73						220120 C1-PARD6B C2-GATA3 C3-DAPI BF C4-FACTIN 7.5uM U73122 treatment DMSO media ctrl.lif - U73122 7.5uM/194:0100-0372-0431:c:5/5 z:20/78 - U73122 7.5uM/194	62.53	49.28
20181227 c1 phalloidin c2 pard6 c3 gata3.lif - control inhibitor/84:0208-0266-0339:c:3/5 z:42/73 - control inhibitor/84	44.35	25.82														220120 C1-PARD6B C2-GATA3 C3-DAPI BF C4-FACTIN 7.5uM U73122 treatment DMSO media ctrl.lif - DMSO/213:0180-0713-0614:c:5/5 z:36/76 - DMSO/213	18.87	39.52						190613 Media only DMSO inhibitor 5uM C1Factin C2Gata3 C3Pard6b C4 DAPI C5BF.lif - inhibitor 5uM/128:0216-0703-0540:c:1/5 z:44/78 - inhibitor 5uM/128	56.65	66.22						220120 C1-PARD6B C2-GATA3 C3-DAPI BF C4-FACTIN 7.5uM U73122 treatment DMSO media ctrl.lif - U73122 7.5uM/194:0100-0421-0428:c:5/5 z:20/78 - U73122 7.5uM/194	59.52	25.51
20181227 c1 phalloidin c2 pard6 c3 gata3.lif - control inhibitor/84:0208-0369-0386:c:3/5 z:42/73 - control inhibitor/84	43.13	26.85														220120 C1-PARD6B C2-GATA3 C3-DAPI BF C4-FACTIN 7.5uM U73122 treatment DMSO media ctrl.lif - DMSO/213:0180-0663-0568:c:5/5 z:36/76 - DMSO/213	61.1	45.24						Embryo 127								220120 C1-PARD6B C2-GATA3 C3-DAPI BF C4-FACTIN 7.5uM U73122 treatment DMSO media ctrl.lif - U73122 7.5uM/194:0100-0511-0304:c:5/5 z:20/78 - U73122 7.5uM/194	37.13	55.5	0.968693	0.75971
20181227 c1 phalloidin c2 pard6 c3 gata3.lif - control inhibitor/84:0143-0292-0578:c:3/5 z:29/73 - control inhibitor/84	57.87	22.93	1.3871													220120 C1-PARD6B C2-GATA3 C3-DAPI BF C4-FACTIN 7.5uM U73122 treatment DMSO media ctrl.lif - DMSO/213:0180-0469-0708:c:5/5 z:36/76 - DMSO/213	51.79	46.75	0.970577	1.04985				190613 Media only DMSO inhibitor 5uM C1Factin C2Gata3 C3Pard6b C4 DAPI C5BF.lif - inhibitor 5uM/127:0176-0309-0356:c:1/5 z:36/78 - inhibitor 5uM/127	119.82	76.41	2.04088	1.87601	2.95629	1.31172		220120 C1-PARD6B C2-GATA3 C3-DAPI BF C4-FACTIN 7.5uM U73122 treatment DMSO media ctrl.lif - U73122 7.5uM/194:0100-0514-0333:c:5/5 z:20/78 - U73122 7.5uM/194	63.01	57.85
20181227 c1 phalloidin c2 pard6 c3 gata3.lif - control inhibitor/84:0143-0304-0569:c:3/5 z:29/73 - control inhibitor/84	33.24	23.39														220120 C1-PARD6B C2-GATA3 C3-DAPI BF C4-FACTIN 7.5uM U73122 treatment DMSO media ctrl.lif - DMSO/213:0180-0468-0669:c:5/5 z:36/76 - DMSO/213	46.48	36.81						190613 Media only DMSO inhibitor 5uM C1Factin C2Gata3 C3Pard6b C4 DAPI C5BF.lif - inhibitor 5uM/127:0176-0315-0299:c:1/5 z:36/78 - inhibitor 5uM/127	61.59	47.62						220120 C1-PARD6B C2-GATA3 C3-DAPI BF C4-FACTIN 7.5uM U73122 treatment DMSO media ctrl.lif - U73122 7.5uM/194:0100-0515-0374:c:5/5 z:20/78 - U73122 7.5uM/194	38.33	25.92
20181227 c1 phalloidin c2 pard6 c3 gata3.lif - control inhibitor/84:0143-0391-0524:c:3/5 z:29/73 - control inhibitor/84	41.72	18.42														220120 C1-PARD6B C2-GATA3 C3-DAPI BF C4-FACTIN 7.5uM U73122 treatment DMSO media ctrl.lif - DMSO/213:0180-0515-0618:c:5/5 z:36/76 - DMSO/213	53.36	44.53						190613 Media only DMSO inhibitor 5uM C1Factin C2Gata3 C3Pard6b C4 DAPI C5BF.lif - inhibitor 5uM/127:0176-0374-0398:c:1/5 z:36/78 - inhibitor 5uM/127	58.71	40.73						220120 C1-PARD6B C2-GATA3 C3-DAPI BF C4-FACTIN 7.5uM U73122 treatment DMSO media ctrl.lif - U73122 7.5uM/194:0100-0631-0398:c:5/5 z:20/78 - U73122 7.5uM/194	44.59	59.11	1.17497	0.569985
20181227 c1 phalloidin c2 pard6 c3 gata3.lif - control inhibitor/84:0173-0482-0675:c:3/5 z:35/73 - control inhibitor/84	48.32	15.75	1.57138													220120 C1-PARD6B C2-GATA3 C3-DAPI BF C4-FACTIN 7.5uM U73122 treatment DMSO media ctrl.lif - DMSO/213:0180-0355-0619:c:5/5 z:36/76 - DMSO/213	102.81	42.94	1.65104	0.999767				190613 Media only DMSO inhibitor 5uM C1Factin C2Gata3 C3Pard6b C4 DAPI C5BF.lif - inhibitor 5uM/127:0176-0204-0553:c:1/5 z:36/78 - inhibitor 5uM/127	139.74	66.13	3.18097	1.04355				220120 C1-PARD6B C2-GATA3 C3-DAPI BF C4-FACTIN 7.5uM U73122 treatment DMSO media ctrl.lif - U73122 7.5uM/194:0100-0583-0439:c:5/5 z:20/78 - U73122 7.5uM/194	61.24	22.97
20181227 c1 phalloidin c2 pard6 c3 gata3.lif - control inhibitor/84:0173-0488-0661:c:3/5 z:35/73 - control inhibitor/84	36.29	18.98														220120 C1-PARD6B C2-GATA3 C3-DAPI BF C4-FACTIN 7.5uM U73122 treatment DMSO media ctrl.lif - DMSO/213:0180-0427-0581:c:5/5 z:36/76 - DMSO/213	29.05	33.31						190613 Media only DMSO inhibitor 5uM C1Factin C2Gata3 C3Pard6b C4 DAPI C5BF.lif - inhibitor 5uM/127:0176-0263-0550:c:1/5 z:36/78 - inhibitor 5uM/127	28.77	61.08						220120 C1-PARD6B C2-GATA3 C3-DAPI BF C4-FACTIN 7.5uM U73122 treatment DMSO media ctrl.lif - U73122 7.5uM/194:0100-0563-0460:c:5/5 z:20/78 - U73122 7.5uM/194	37.95	17.95
20181227 c1 phalloidin c2 pard6 c3 gata3.lif - control inhibitor/84:0173-0508-0482:c:3/5 z:35/73 - control inhibitor/84	30.75	24.71														220120 C1-PARD6B C2-GATA3 C3-DAPI BF C4-FACTIN 7.5uM U73122 treatment DMSO media ctrl.lif - DMSO/213:0180-0432-0622:c:5/5 z:36/76 - DMSO/213	62.27	42.95						190613 Media only DMSO inhibitor 5uM C1Factin C2Gata3 C3Pard6b C4 DAPI C5BF.lif - inhibitor 5uM/127:0176-0282-0600:c:1/5 z:36/78 - inhibitor 5uM/127	43.93	63.37						220120 C1-PARD6B C2-GATA3 C3-DAPI BF C4-FACTIN 7.5uM U73122 treatment DMSO media ctrl.lif - U73122 7.5uM/194:0100-0617-0570:c:5/5 z:20/78 - U73122 7.5uM/194	73.55	45.51	1.68114	1.13934
20181227 c1 phalloidin c2 pard6 c3 gata3.lif - control inhibitor/84:0113-0744-0514:c:3/5 z:23/73 - control inhibitor/84	44.17	17.59	0.799168													220120 C1-PARD6B C2-GATA3 C3-DAPI BF C4-FACTIN 7.5uM U73122 treatment DMSO media ctrl.lif - DMSO/213:0180-0360-0451:c:5/5 z:36/76 - DMSO/213	68.27	43.93	1.33392	0.824357				190613 Media only DMSO inhibitor 5uM C1Factin C2Gata3 C3Pard6b C4 DAPI C5BF.lif - inhibitor 5uM/127:0176-0260-0685:c:1/5 z:36/78 - inhibitor 5uM/127	100.79	65.04	1.57583	1.55822				220120 C1-PARD6B C2-GATA3 C3-DAPI BF C4-FACTIN 7.5uM U73122 treatment DMSO media ctrl.lif - U73122 7.5uM/194:0100-0579-0564:c:5/5 z:20/78 - U73122 7.5uM/194	60.11	30.76
20181227 c1 phalloidin c2 pard6 c3 gata3.lif - control inhibitor/84:0113-0741-0509:c:3/5 z:23/73 - control inhibitor/84	41.46	21.67		1.00464												220120 C1-PARD6B C2-GATA3 C3-DAPI BF C4-FACTIN 7.5uM U73122 treatment DMSO media ctrl.lif - DMSO/213:0180-0371-0438:c:5/5 z:36/76 - DMSO/213	45.6	35.17						190613 Media only DMSO inhibitor 5uM C1Factin C2Gata3 C3Pard6b C4 DAPI C5BF.lif - inhibitor 5uM/127:0176-0315-0677:c:1/5 z:36/78 - inhibitor 5uM/127	60.09	51.02						220120 C1-PARD6B C2-GATA3 C3-DAPI BF C4-FACTIN 7.5uM U73122 treatment DMSO media ctrl.lif - U73122 7.5uM/194:0100-0577-0544:c:5/5 z:20/78 - U73122 7.5uM/194	43.75	20.83
20181227 c1 phalloidin c2 pard6 c3 gata3.lif - control inhibitor/84:0113-0652-0538:c:3/5 z:23/73 - control inhibitor/84	55.27	27.89														220120 C1-PARD6B C2-GATA3 C3-DAPI BF C4-FACTIN 7.5uM U73122 treatment DMSO media ctrl.lif - DMSO/213:0180-0441-0458:c:5/5 z:36/76 - DMSO/213	51.18	53.29						190613 Media only DMSO inhibitor 5uM C1Factin C2Gata3 C3Pard6b C4 DAPI C5BF.lif - inhibitor 5uM/127:0176-0356-0698:c:1/5 z:36/78 - inhibitor 5uM/127	63.96	41.74						apical		27.21
20181227 c1 phalloidin c2 pard6 c3 gata3.lif - control inhibitor/84:0073-0633-0306:c:3/5 z:16/73 - control inhibitor/84	57.58	21.57	1.13503													220120 C1-PARD6B C2-GATA3 C3-DAPI BF C4-FACTIN 7.5uM U73122 treatment DMSO media ctrl.lif - DMSO/213:0180-0543-0348:c:5/5 z:36/76 - DMSO/213	52.17		1.12121					190613 Media only DMSO inhibitor 5uM C1Factin C2Gata3 C3Pard6b C4 DAPI C5BF.lif - inhibitor 5uM/127:0176-0394-0770:c:1/5 z:36/78 - inhibitor 5uM/127	119.18	71.07	0.950626	0.953448				cytoplasm		15.56
20181227 c1 phalloidin c2 pard6 c3 gata3.lif - control inhibitor/84:0073-0635-0316:c:3/5 z:16/73 - control inhibitor/84	35.13															220120 C1-PARD6B C2-GATA3 C3-DAPI BF C4-FACTIN 7.5uM U73122 treatment DMSO media ctrl.lif - DMSO/213:0180-0548-0386:c:5/5 z:36/76 - DMSO/213	35.23							190613 Media only DMSO inhibitor 5uM C1Factin C2Gata3 C3Pard6b C4 DAPI C5BF.lif - inhibitor 5uM/127:0176-0434-0656:c:1/5 z:36/78 - inhibitor 5uM/127	32.9	50.23						basal		10.5
20181227 c1 phalloidin c2 pard6 c3 gata3.lif - control inhibitor/84:0073-0533-0344:c:3/5 z:16/73 - control inhibitor/84	50.73															220120 C1-PARD6B C2-GATA3 C3-DAPI BF C4-FACTIN 7.5uM U73122 treatment DMSO media ctrl.lif - DMSO/213:0180-0498-0459:c:5/5 z:36/76 - DMSO/213	46.53							190613 Media only DMSO inhibitor 5uM C1Factin C2Gata3 C3Pard6b C4 DAPI C5BF.lif - inhibitor 5uM/127:0176-0510-0728:c:1/5 z:36/78 - inhibitor 5uM/127	125.37	74.54						Embryo 193
20181227 c1 phalloidin c2 pard6 c3 gata3.lif - control inhibitor/84:0118-0472-0288:c:3/5 z:25/73 - control inhibitor/84	47.49		1.24287													220120 C1-PARD6B C2-GATA3 C3-DAPI BF C4-FACTIN 7.5uM U73122 treatment DMSO media ctrl.lif - DMSO/213:0180-0691-0471:c:5/5 z:36/76 - DMSO/213	53.09		0.777192					190613 Media only DMSO inhibitor 5uM C1Factin C2Gata3 C3Pard6b C4 DAPI C5BF.lif - inhibitor 5uM/127:0176-0697-0285:c:1/5 z:36/78 - inhibitor 5uM/127	144.69	61.06	4.94329	1.03194				220120 C1-PARD6B C2-GATA3 C3-DAPI BF C4-FACTIN 7.5uM U73122 treatment DMSO media ctrl.lif - U73122 7.5uM/193:0180-0439-0344:c:5/5 z:36/69 - U73122 7.5uM/193	30.17	47.95	0.908735	1.3396	1.48708	1.27541
20181227 c1 phalloidin c2 pard6 c3 gata3.lif - control inhibitor/84:0118-0479-0311:c:3/5 z:25/73 - control inhibitor/84	38.06															220120 C1-PARD6B C2-GATA3 C3-DAPI BF C4-FACTIN 7.5uM U73122 treatment DMSO media ctrl.lif - DMSO/213:0180-0708-0488:c:5/5 z:36/76 - DMSO/213	64.06							190613 Media only DMSO inhibitor 5uM C1Factin C2Gata3 C3Pard6b C4 DAPI C5BF.lif - inhibitor 5uM/127:0176-0696-0284:c:1/5 z:36/78 - inhibitor 5uM/127	58.4	59.07						220120 C1-PARD6B C2-GATA3 C3-DAPI BF C4-FACTIN 7.5uM U73122 treatment DMSO media ctrl.lif - U73122 7.5uM/193:0180-0452-0350:c:5/5 z:36/69 - U73122 7.5uM/193	26.37	9.27
20181227 c1 phalloidin c2 pard6 c3 gata3.lif - control inhibitor/84:0118-0492-0388:c:3/5 z:25/73 - control inhibitor/84	38.21															220120 C1-PARD6B C2-GATA3 C3-DAPI BF C4-FACTIN 7.5uM U73122 treatment DMSO media ctrl.lif - DMSO/213:0180-0642-0562:c:5/5 z:36/76 - DMSO/213	68.31							190613 Media only DMSO inhibitor 5uM C1Factin C2Gata3 C3Pard6b C4 DAPI C5BF.lif - inhibitor 5uM/127:0176-0598-0314:c:1/5 z:36/78 - inhibitor 5uM/127	29.27	59.17						220120 C1-PARD6B C2-GATA3 C3-DAPI BF C4-FACTIN 7.5uM U73122 treatment DMSO media ctrl.lif - U73122 7.5uM/193:0180-0484-0407:c:5/5 z:36/69 - U73122 7.5uM/193	33.2	17.5
Embryo 81																Embryo 211								190613 Media only DMSO inhibitor 5uM C1Factin C2Gata3 C3Pard6b C4 DAPI C5BF.lif - inhibitor 5uM/127:0176-0836-0378:c:1/5 z:36/78 - inhibitor 5uM/127	159.71	76.83	5.04613	1.40714				220120 C1-PARD6B C2-GATA3 C3-DAPI BF C4-FACTIN 7.5uM U73122 treatment DMSO media ctrl.lif - U73122 7.5uM/193:0180-0455-0669:c:5/5 z:36/69 - U73122 7.5uM/193	27.56	6.79	0.833888	1.1485
20181227 c1 phalloidin c2 pard6 c3 gata3.lif - control inhibitor/81:0103-0512-0310:c:3/5 z:21/78 - control inhibitor/81	56.16	41.79	1.02444	1.18553	1.43672	1.1542										220120 C1-PARD6B C2-GATA3 C3-DAPI BF C4-FACTIN 7.5uM U73122 treatment DMSO media ctrl.lif - DMSO/211:0145-0459-0371:c:5/5 z:29/81 - DMSO/211	55.35	40.81	1.08253	1.01517	0.971972	0.966898		190613 Media only DMSO inhibitor 5uM C1Factin C2Gata3 C3Pard6b C4 DAPI C5BF.lif - inhibitor 5uM/127:0176-0809-0415:c:1/5 z:36/78 - inhibitor 5uM/127	23.43	62.12						220120 C1-PARD6B C2-GATA3 C3-DAPI BF C4-FACTIN 7.5uM U73122 treatment DMSO media ctrl.lif - U73122 7.5uM/193:0180-0451-0642:c:5/5 z:36/69 - U73122 7.5uM/193	29.16	7.48
20181227 c1 phalloidin c2 pard6 c3 gata3.lif - control inhibitor/81:0103-0497-0397:c:3/5 z:21/78 - control inhibitor/81	41.41	37.12														220120 C1-PARD6B C2-GATA3 C3-DAPI BF C4-FACTIN 7.5uM U73122 treatment DMSO media ctrl.lif - DMSO/211:0145-0476-0389:c:5/5 z:29/81 - DMSO/211	49.45	35.37						190613 Media only DMSO inhibitor 5uM C1Factin C2Gata3 C3Pard6b C4 DAPI C5BF.lif - inhibitor 5uM/127:0176-0756-0398:c:1/5 z:36/78 - inhibitor 5uM/127	31.65	54.6						220120 C1-PARD6B C2-GATA3 C3-DAPI BF C4-FACTIN 7.5uM U73122 treatment DMSO media ctrl.lif - U73122 7.5uM/193:0180-0466-0589:c:5/5 z:36/69 - U73122 7.5uM/193	33.05	21.44
20181227 c1 phalloidin c2 pard6 c3 gata3.lif - control inhibitor/81:0103-0586-0713:c:3/5 z:21/78 - control inhibitor/81	54.82	35.25														220120 C1-PARD6B C2-GATA3 C3-DAPI BF C4-FACTIN 7.5uM U73122 treatment DMSO media ctrl.lif - DMSO/211:0145-0561-0359:c:5/5 z:29/81 - DMSO/211	51.13	40.2						Embryo 125								220120 C1-PARD6B C2-GATA3 C3-DAPI BF C4-FACTIN 7.5uM U73122 treatment DMSO media ctrl.lif - U73122 7.5uM/193:0180-0633-0438:c:5/5 z:36/69 - U73122 7.5uM/193	33.57	55.42	1.13912	1.54303
20181227 c1 phalloidin c2 pard6 c3 gata3.lif - control inhibitor/81:0103-0562-0687:c:3/5 z:21/78 - control inhibitor/81	69.94	45.85	1.49317	1.28865												220120 C1-PARD6B C2-GATA3 C3-DAPI BF C4-FACTIN 7.5uM U73122 treatment DMSO media ctrl.lif - DMSO/211:0175-0616-0328:c:5/5 z:35/81 - DMSO/211	65.98	38.85	1.10965	0.919744				190613 Media only DMSO inhibitor 5uM C1Factin C2Gata3 C3Pard6b C4 DAPI C5BF.lif - inhibitor 5uM/125:0156-0265-0485:c:1/5 z:32/78 - inhibitor 5uM/125	63.66	83.06	0.745608	1.38641	1.38577	1.34927		220120 C1-PARD6B C2-GATA3 C3-DAPI BF C4-FACTIN 7.5uM U73122 treatment DMSO media ctrl.lif - U73122 7.5uM/193:0180-0632-0449:c:5/5 z:36/69 - U73122 7.5uM/193	21.64	14.53
20181227 c1 phalloidin c2 pard6 c3 gata3.lif - control inhibitor/81:0103-0606-0608:c:3/5 z:21/78 - control inhibitor/81	36.19	38.85														220120 C1-PARD6B C2-GATA3 C3-DAPI BF C4-FACTIN 7.5uM U73122 treatment DMSO media ctrl.lif - DMSO/211:0175-0669-0370:c:5/5 z:35/81 - DMSO/211	33.36	32.11						190613 Media only DMSO inhibitor 5uM C1Factin C2Gata3 C3Pard6b C4 DAPI C5BF.lif - inhibitor 5uM/125:0156-0297-0496:c:1/5 z:32/78 - inhibitor 5uM/125	72.8	61.12						220120 C1-PARD6B C2-GATA3 C3-DAPI BF C4-FACTIN 7.5uM U73122 treatment DMSO media ctrl.lif - U73122 7.5uM/193:0180-0574-0475:c:5/5 z:36/69 - U73122 7.5uM/193	29.47	26.18
20181227 c1 phalloidin c2 pard6 c3 gata3.lif - control inhibitor/81:0173-0770-0463:c:3/5 z:35/78 - control inhibitor/81	46.84	35.58														220120 C1-PARD6B C2-GATA3 C3-DAPI BF C4-FACTIN 7.5uM U73122 treatment DMSO media ctrl.lif - DMSO/211:0175-0541-0389:c:5/5 z:35/81 - DMSO/211	59.46	42.24						190613 Media only DMSO inhibitor 5uM C1Factin C2Gata3 C3Pard6b C4 DAPI C5BF.lif - inhibitor 5uM/125:0156-0358-0574:c:1/5 z:32/78 - inhibitor 5uM/125	85.38	59.91						220120 C1-PARD6B C2-GATA3 C3-DAPI BF C4-FACTIN 7.5uM U73122 treatment DMSO media ctrl.lif - U73122 7.5uM/193:0180-0653-0563:c:5/5 z:36/69 - U73122 7.5uM/193	49.71	36.77	1.21037	1.31235
20181227 c1 phalloidin c2 pard6 c3 gata3.lif - control inhibitor/81:0173-0754-0465:c:3/5 z:35/78 - control inhibitor/81	61.02	33.06	1.99477	0.860713												220120 C1-PARD6B C2-GATA3 C3-DAPI BF C4-FACTIN 7.5uM U73122 treatment DMSO media ctrl.lif - DMSO/211:0175-0730-0567:c:5/5 z:35/81 - DMSO/211	38.12	45.13	0.539027	0.884035				190613 Media only DMSO inhibitor 5uM C1Factin C2Gata3 C3Pard6b C4 DAPI C5BF.lif - inhibitor 5uM/125:0156-0362-0682:c:1/5 z:32/78 - inhibitor 5uM/125	50.01	60.28	0.566557	1.28969				220120 C1-PARD6B C2-GATA3 C3-DAPI BF C4-FACTIN 7.5uM U73122 treatment DMSO media ctrl.lif - U73122 7.5uM/193:0180-0654-0567:c:5/5 z:36/69 - U73122 7.5uM/193	28.48	24.59
20181227 c1 phalloidin c2 pard6 c3 gata3.lif - control inhibitor/81:0173-0514-0455:c:3/5 z:35/78 - control inhibitor/81	30.26	32.3														220120 C1-PARD6B C2-GATA3 C3-DAPI BF C4-FACTIN 7.5uM U73122 treatment DMSO media ctrl.lif - DMSO/211:0175-0692-0563:c:5/5 z:35/81 - DMSO/211	37.36	43.96						190613 Media only DMSO inhibitor 5uM C1Factin C2Gata3 C3Pard6b C4 DAPI C5BF.lif - inhibitor 5uM/125:0156-0415-0660:c:1/5 z:32/78 - inhibitor 5uM/125	77.9	60.09						220120 C1-PARD6B C2-GATA3 C3-DAPI BF C4-FACTIN 7.5uM U73122 treatment DMSO media ctrl.lif - U73122 7.5uM/193:0180-0615-0542:c:5/5 z:36/69 - U73122 7.5uM/193	41.07	22.55
20181227 c1 phalloidin c2 pard6 c3 gata3.lif - control inhibitor/81:0173-0538-0808:c:3/5 z:35/78 - control inhibitor/81	30.59	38.41														220120 C1-PARD6B C2-GATA3 C3-DAPI BF C4-FACTIN 7.5uM U73122 treatment DMSO media ctrl.lif - DMSO/211:0175-0625-0613:c:5/5 z:35/81 - DMSO/211	70.72	51.05						190613 Media only DMSO inhibitor 5uM C1Factin C2Gata3 C3Pard6b C4 DAPI C5BF.lif - inhibitor 5uM/125:0156-0368-0576:c:1/5 z:32/78 - inhibitor 5uM/125	88.27	46.74						220120 C1-PARD6B C2-GATA3 C3-DAPI BF C4-FACTIN 7.5uM U73122 treatment DMSO media ctrl.lif - U73122 7.5uM/193:0255-0579-0495:c:5/5 z:51/69 - U73122 7.5uM/193	54.5	10.83	3.54356	1.08267
20181227 c1 phalloidin c2 pard6 c3 gata3.lif - control inhibitor/81:0173-0500-0776:c:3/5 z:35/78 - control inhibitor/81	31.33	36.77	1.07923	1.22403												220120 C1-PARD6B C2-GATA3 C3-DAPI BF C4-FACTIN 7.5uM U73122 treatment DMSO media ctrl.lif - DMSO/211:0175-0632-0676:c:5/5 z:35/81 - DMSO/211	43.78	48.94	1.15667	1.04864				190613 Media only DMSO inhibitor 5uM C1Factin C2Gata3 C3Pard6b C4 DAPI C5BF.lif - inhibitor 5uM/125:0231-0589-0213:c:1/5 z:48/78 - inhibitor 5uM/125	54.79	62.08	3.73738	1.18519				220120 C1-PARD6B C2-GATA3 C3-DAPI BF C4-FACTIN 7.5uM U73122 treatment DMSO media ctrl.lif - U73122 7.5uM/193:0255-0570-0532:c:5/5 z:51/69 - U73122 7.5uM/193	15.32	7.02
20181227 c1 phalloidin c2 pard6 c3 gata3.lif - control inhibitor/81:0173-0395-0764:c:3/5 z:35/78 - control inhibitor/81	22.21	20.54														220120 C1-PARD6B C2-GATA3 C3-DAPI BF C4-FACTIN 7.5uM U73122 treatment DMSO media ctrl.lif - DMSO/211:0175-0589-0625:c:5/5 z:35/81 - DMSO/211	44.17	37.36						190613 Media only DMSO inhibitor 5uM C1Factin C2Gata3 C3Pard6b C4 DAPI C5BF.lif - inhibitor 5uM/125:0231-0616-0249:c:1/5 z:48/78 - inhibitor 5uM/125	22.96	63.97						220120 C1-PARD6B C2-GATA3 C3-DAPI BF C4-FACTIN 7.5uM U73122 treatment DMSO media ctrl.lif - U73122 7.5uM/193:0255-0506-0483:c:5/5 z:51/69 - U73122 7.5uM/193	15.38	22.92
20181227 c1 phalloidin c2 pard6 c3 gata3.lif - control inhibitor/81:0208-0275-0681:c:3/5 z:40/78 - control inhibitor/81	29.03	30.04														220120 C1-PARD6B C2-GATA3 C3-DAPI BF C4-FACTIN 7.5uM U73122 treatment DMSO media ctrl.lif - DMSO/211:0175-0581-0665:c:5/5 z:35/81 - DMSO/211	37.85	46.67						190613 Media only DMSO inhibitor 5uM C1Factin C2Gata3 C3Pard6b C4 DAPI C5BF.lif - inhibitor 5uM/125:0231-0443-0304:c:1/5 z:48/78 - inhibitor 5uM/125	14.66	52.38						220120 C1-PARD6B C2-GATA3 C3-DAPI BF C4-FACTIN 7.5uM U73122 treatment DMSO media ctrl.lif - U73122 7.5uM/193:0255-0339-0472:c:5/5 z:51/69 - U73122 7.5uM/193	22.39	97.77	1.28678	1.22632
20181227 c1 phalloidin c2 pard6 c3 gata3.lif - control inhibitor/81:0208-0294-0728:c:3/5 z:40/78 - control inhibitor/81	37.7	29.72	1.56496	1.21207												Embryo 202								190613 Media only DMSO inhibitor 5uM C1Factin C2Gata3 C3Pard6b C4 DAPI C5BF.lif - inhibitor 5uM/125:0126-0807-0432:c:1/5 z:26/78 - inhibitor 5uM/125	81.36	41.74	1.38414	1.45944				220120 C1-PARD6B C2-GATA3 C3-DAPI BF C4-FACTIN 7.5uM U73122 treatment DMSO media ctrl.lif - U73122 7.5uM/193:0255-0329-0503:c:5/5 z:51/69 - U73122 7.5uM/193	25.94	19.67
20181227 c1 phalloidin c2 pard6 c3 gata3.lif - control inhibitor/81:0208-0362-0647:c:3/5 z:40/78 - control inhibitor/81	22.6	31.12														220120 C1-PARD6B C2-GATA3 C3-DAPI BF C4-FACTIN 7.5uM U73122 treatment DMSO media ctrl.lif - DMSO/202:0155-0447-0503:c:5/5 z:31/71 - DMSO/202	66.22	47.22	1.53928	1.31057	1.21939	1.6318		190613 Media only DMSO inhibitor 5uM C1Factin C2Gata3 C3Pard6b C4 DAPI C5BF.lif - inhibitor 5uM/125:0126-0807-0498:c:1/5 z:26/78 - inhibitor 5uM/125	72.41	36.92						220120 C1-PARD6B C2-GATA3 C3-DAPI BF C4-FACTIN 7.5uM U73122 treatment DMSO media ctrl.lif - U73122 7.5uM/193:0255-0397-0576:c:5/5 z:51/69 - U73122 7.5uM/193	17.4	24.7
20181227 c1 phalloidin c2 pard6 c3 gata3.lif - control inhibitor/81:0153-0214-0459:c:3/5 z:31/78 - control inhibitor/81	24.09	24.52														220120 C1-PARD6B C2-GATA3 C3-DAPI BF C4-FACTIN 7.5uM U73122 treatment DMSO media ctrl.lif - DMSO/202:0155-0410-0503:c:5/5 z:31/71 - DMSO/202	18.44	39.26						190613 Media only DMSO inhibitor 5uM C1Factin C2Gata3 C3Pard6b C4 DAPI C5BF.lif - inhibitor 5uM/125:0126-0661-0416:c:1/5 z:26/78 - inhibitor 5uM/125	58.78	28.6						Embryo 192
20181227 c1 phalloidin c2 pard6 c3 gata3.lif - control inhibitor/81:0153-0250-0426:c:3/5 z:31/78 - control inhibitor/81	57.51		1.46373													220120 C1-PARD6B C2-GATA3 C3-DAPI BF C4-FACTIN 7.5uM U73122 treatment DMSO media ctrl.lif - DMSO/202:0155-0469-0625:c:5/5 z:31/71 - DMSO/202	43.02	36.03						190613 Media only DMSO inhibitor 5uM C1Factin C2Gata3 C3Pard6b C4 DAPI C5BF.lif - inhibitor 5uM/125:0126-0605-0612:c:1/5 z:26/78 - inhibitor 5uM/125	63.21	50.21	0.495143	1.42561				220120 C1-PARD6B C2-GATA3 C3-DAPI BF C4-FACTIN 7.5uM U73122 treatment DMSO media ctrl.lif - U73122 7.5uM/192:0175-0681-0522:c:5/5 z:35/76 - U73122 7.5uM/192	35.18	88.73	1.56217	0.919596	1.04521	1.03392
20181227 c1 phalloidin c2 pard6 c3 gata3.lif - control inhibitor/81:0153-0338-0504:c:3/5 z:31/78 - control inhibitor/81	38.15															220120 C1-PARD6B C2-GATA3 C3-DAPI BF C4-FACTIN 7.5uM U73122 treatment DMSO media ctrl.lif - DMSO/202:0155-0567-0685:c:5/5 z:31/71 - DMSO/202	30.76	59.63	0.974651	1.70226				190613 Media only DMSO inhibitor 5uM C1Factin C2Gata3 C3Pard6b C4 DAPI C5BF.lif - inhibitor 5uM/125:0126-0615-0594:c:1/5 z:26/78 - inhibitor 5uM/125	76.32	53.12						220120 C1-PARD6B C2-GATA3 C3-DAPI BF C4-FACTIN 7.5uM U73122 treatment DMSO media ctrl.lif - U73122 7.5uM/192:0175-0668-0526:c:5/5 z:35/76 - U73122 7.5uM/192	29.02	21.57
20181227 c1 phalloidin c2 pard6 c3 gata3.lif - control inhibitor/81:0153-0338-0504:c:3/5 z:31/78 - control inhibitor/81	39.29															220120 C1-PARD6B C2-GATA3 C3-DAPI BF C4-FACTIN 7.5uM U73122 treatment DMSO media ctrl.lif - DMSO/202:0155-0544-0724:c:5/5 z:31/71 - DMSO/202	37.4	49.05						190613 Media only DMSO inhibitor 5uM C1Factin C2Gata3 C3Pard6b C4 DAPI C5BF.lif - inhibitor 5uM/125:0126-0517-0611:c:1/5 z:26/78 - inhibitor 5uM/125	127.66	35.22						220120 C1-PARD6B C2-GATA3 C3-DAPI BF C4-FACTIN 7.5uM U73122 treatment DMSO media ctrl.lif - U73122 7.5uM/192:0175-0611-0433:c:5/5 z:35/76 - U73122 7.5uM/192	22.52	30.76
Embryo 80																220120 C1-PARD6B C2-GATA3 C3-DAPI BF C4-FACTIN 7.5uM U73122 treatment DMSO media ctrl.lif - DMSO/202:0155-0453-0637:c:5/5 z:31/71 - DMSO/202	31.56	35.03														220120 C1-PARD6B C2-GATA3 C3-DAPI BF C4-FACTIN 7.5uM U73122 treatment DMSO media ctrl.lif - U73122 7.5uM/192:0175-0506-0665:c:5/5 z:35/76 - U73122 7.5uM/192	26.19	33.96	0.976146	1.14487
20181227 c1 phalloidin c2 pard6 c3 gata3.lif - control inhibitor/80:0198-0566-0268:c:3/5 z:40/71 - control inhibitor/80	53.92	32.59	2.45091	1.26122	1.7704	1.17576										220120 C1-PARD6B C2-GATA3 C3-DAPI BF C4-FACTIN 7.5uM U73122 treatment DMSO media ctrl.lif - DMSO/202:0155-0271-0741:c:5/5 z:31/71 - DMSO/202	36.41	67.49	1.14425	1.88257												220120 C1-PARD6B C2-GATA3 C3-DAPI BF C4-FACTIN 7.5uM U73122 treatment DMSO media ctrl.lif - U73122 7.5uM/192:0175-0504-0586:c:5/5 z:35/76 - U73122 7.5uM/192	27.8	27.06
20181227 c1 phalloidin c2 pard6 c3 gata3.lif - control inhibitor/80:0198-0561-0322:c:3/5 z:40/71 - control inhibitor/80	19.35	21.29														220120 C1-PARD6B C2-GATA3 C3-DAPI BF C4-FACTIN 7.5uM U73122 treatment DMSO media ctrl.lif - DMSO/202:0155-0280-0613:c:5/5 z:31/71 - DMSO/202	24.31	41.65														220120 C1-PARD6B C2-GATA3 C3-DAPI BF C4-FACTIN 7.5uM U73122 treatment DMSO media ctrl.lif - U73122 7.5uM/192:0175-0497-0521:c:5/5 z:35/76 - U73122 7.5uM/192	26.83	23.81
20181227 c1 phalloidin c2 pard6 c3 gata3.lif - control inhibitor/80:0198-0589-0339:c:3/5 z:40/71 - control inhibitor/80	22	25.84														220120 C1-PARD6B C2-GATA3 C3-DAPI BF C4-FACTIN 7.5uM U73122 treatment DMSO media ctrl.lif - DMSO/202:0155-0328-0630:c:5/5 z:31/71 - DMSO/202	31.82	35.85														220120 C1-PARD6B C2-GATA3 C3-DAPI BF C4-FACTIN 7.5uM U73122 treatment DMSO media ctrl.lif - U73122 7.5uM/192:0205-0619-0336:c:5/5 z:41/76 - U73122 7.5uM/192	15.33	75.67	0.594647	0.946159
20181227 c1 phalloidin c2 pard6 c3 gata3.lif - control inhibitor/80:0153-0370-0405:c:3/5 z:31/71 - control inhibitor/80	39.92	27.45	1.75473	1.38009												Embryo 250																220120 C1-PARD6B C2-GATA3 C3-DAPI BF C4-FACTIN 7.5uM U73122 treatment DMSO media ctrl.lif - U73122 7.5uM/192:0205-0623-0348:c:5/5 z:41/76 - U73122 7.5uM/192	30.61	28.99
20181227 c1 phalloidin c2 pard6 c3 gata3.lif - control inhibitor/80:0153-0363-0383:c:3/5 z:31/71 - control inhibitor/80	19.31	27.32														2020JUL12 U73122 7.5uM trial3 F-actin PARD6B GATA3 DAPI BF.lif - DMSO/250:0171-0442-0277:c:1/5 z:35/74 - DMSO/250	34.73	29.11	2.09976	1.16955	1.79773	1.21195										220120 C1-PARD6B C2-GATA3 C3-DAPI BF C4-FACTIN 7.5uM U73122 treatment DMSO media ctrl.lif - U73122 7.5uM/192:0205-0541-0379:c:5/5 z:41/76 - U73122 7.5uM/192	25.78	23.22
20181227 c1 phalloidin c2 pard6 c3 gata3.lif - control inhibitor/80:0153-0395-0412:c:3/5 z:31/71 - control inhibitor/80	22.75	19.89														2020JUL12 U73122 7.5uM trial3 F-actin PARD6B GATA3 DAPI BF.lif - DMSO/250:0171-0448-0258:c:1/5 z:35/74 - DMSO/250	22.2	21.59														220120 C1-PARD6B C2-GATA3 C3-DAPI BF C4-FACTIN 7.5uM U73122 treatment DMSO media ctrl.lif - U73122 7.5uM/192:0130-0469-0315:c:5/5 z:26/76 - U73122 7.5uM/192	32.62	87.63	1.04786	1.12504
20181227 c1 phalloidin c2 pard6 c3 gata3.lif - control inhibitor/80:0153-0538-0749:c:3/5 z:31/71 - control inhibitor/80	43.22	25.64	1.74909	1.11044												2020JUL12 U73122 7.5uM trial3 F-actin PARD6B GATA3 DAPI BF.lif - DMSO/250:0171-0560-0307:c:1/5 z:35/74 - DMSO/250	16.54	24.89														220120 C1-PARD6B C2-GATA3 C3-DAPI BF C4-FACTIN 7.5uM U73122 treatment DMSO media ctrl.lif - U73122 7.5uM/192:0130-0471-0351:c:5/5 z:26/76 - U73122 7.5uM/192	26.7	20.17
20181227 c1 phalloidin c2 pard6 c3 gata3.lif - control inhibitor/80:0153-0523-0724:c:3/5 z:31/71 - control inhibitor/80	23.38	19.22														2020JUL12 U73122 7.5uM trial3 F-actin PARD6B GATA3 DAPI BF.lif - DMSO/250:0171-0695-0326:c:1/5 z:35/74 - DMSO/250	23.37	16.91	2.20056	0.826895												220120 C1-PARD6B C2-GATA3 C3-DAPI BF C4-FACTIN 7.5uM U73122 treatment DMSO media ctrl.lif - U73122 7.5uM/192:0130-0465-0395:c:5/5 z:26/76 - U73122 7.5uM/192	31.13	21.89
20181227 c1 phalloidin c2 pard6 c3 gata3.lif - control inhibitor/80:0153-0470-0597:c:3/5 z:31/71 - control inhibitor/80	24.71	23.09														2020JUL12 U73122 7.5uM trial3 F-actin PARD6B GATA3 DAPI BF.lif - DMSO/250:0171-0760-0375:c:1/5 z:35/74 - DMSO/250	19.2	18.53														Embryo 238
20181227 c1 phalloidin c2 pard6 c3 gata3.lif - control inhibitor/80:0098-0734-0591:c:3/5 z:19/71 - control inhibitor/80	44.85	23.19	1.64829	0.976421												2020JUL12 U73122 7.5uM trial3 F-actin PARD6B GATA3 DAPI BF.lif - DMSO/250:0171-0685-0440:c:1/5 z:35/74 - DMSO/250	10.62	20.45														2020JUL12 U73122 7.5uM trial3 F-actin PARD6B GATA3 DAPI BF.lif - U73122 7.5uM/238:0211-0180-0645:c:1/5 z:43/87 - U73122 7.5uM/238	28.14	52.59	1.00788	1.00533	0.936339	0.868272
20181227 c1 phalloidin c2 pard6 c3 gata3.lif - control inhibitor/80:0098-0701-0600:c:3/5 z:19/71 - control inhibitor/80	37.8	20.64														2020JUL12 U73122 7.5uM trial3 F-actin PARD6B GATA3 DAPI BF.lif - DMSO/250:0171-0737-0598:c:1/5 z:35/74 - DMSO/250	22.72	19.56	1.09547	1.43824												2020JUL12 U73122 7.5uM trial3 F-actin PARD6B GATA3 DAPI BF.lif - U73122 7.5uM/238:0211-0195-0612:c:1/5 z:43/87 - U73122 7.5uM/238	30.6	10.03
20181227 c1 phalloidin c2 pard6 c3 gata3.lif - control inhibitor/80:0098-0704-0489:c:3/5 z:19/71 - control inhibitor/80	27.21	23.75														2020JUL12 U73122 7.5uM trial3 F-actin PARD6B GATA3 DAPI BF.lif - DMSO/250:0171-0749-0606:c:1/5 z:35/74 - DMSO/250	13.7	24.31														2020JUL12 U73122 7.5uM trial3 F-actin PARD6B GATA3 DAPI BF.lif - U73122 7.5uM/238:0211-0189-0478:c:1/5 z:43/87 - U73122 7.5uM/238	27.92	15.61
20181227 c1 phalloidin c2 pard6 c3 gata3.lif - control inhibitor/80:0238-0338-0444:c:3/5 z:51/71 - control inhibitor/80	27.01	27.27	1.41785	1.15063												2020JUL12 U73122 7.5uM trial3 F-actin PARD6B GATA3 DAPI BF.lif - DMSO/250:0171-0533-0648:c:1/5 z:35/74 - DMSO/250	20.74	13.6														2020JUL12 U73122 7.5uM trial3 F-actin PARD6B GATA3 DAPI BF.lif - U73122 7.5uM/238:0166-0174-0396:c:1/5 z:34/87 - U73122 7.5uM/238	22.88	43.64	0.93963	0.847353
20181227 c1 phalloidin c2 pard6 c3 gata3.lif - control inhibitor/80:0238-0333-0418:c:3/5 z:51/71 - control inhibitor/80	9.25	20.02														2020JUL12 U73122 7.5uM trial3 F-actin PARD6B GATA3 DAPI BF.lif - DMSO/250:0186-0411-0855:c:1/5 z:38/74 - DMSO/250	17	16.87	1.28593	1.00656												2020JUL12 U73122 7.5uM trial3 F-actin PARD6B GATA3 DAPI BF.lif - U73122 7.5uM/238:0166-0214-0449:c:1/5 z:34/87 - U73122 7.5uM/238	22.53	12.22
20181227 c1 phalloidin c2 pard6 c3 gata3.lif - control inhibitor/80:0238-0415-0448:c:3/5 z:51/71 - control inhibitor/80	19.05	23.7														2020JUL12 U73122 7.5uM trial3 F-actin PARD6B GATA3 DAPI BF.lif - DMSO/250:0186-0461-0836:c:1/5 z:38/74 - DMSO/250	22.22	17.9														2020JUL12 U73122 7.5uM trial3 F-actin PARD6B GATA3 DAPI BF.lif - U73122 7.5uM/238:0166-0221-0503:c:1/5 z:34/87 - U73122 7.5uM/238	24.35	14.36
20181227 c1 phalloidin c2 pard6 c3 gata3.lif - control inhibitor/80:0253-0529-0320:c:3/5 z:51/71 - control inhibitor/80	35.33		1.60154													2020JUL12 U73122 7.5uM trial3 F-actin PARD6B GATA3 DAPI BF.lif - DMSO/250:0186-0466-0736:c:1/5 z:38/74 - DMSO/250	13.22	16.76														2020JUL12 U73122 7.5uM trial3 F-actin PARD6B GATA3 DAPI BF.lif - U73122 7.5uM/238:0166-0330-0237:c:1/5 z:34/87 - U73122 7.5uM/238	28.06	39.56	0.861794	0.777294
20181227 c1 phalloidin c2 pard6 c3 gata3.lif - control inhibitor/80:0253-0508-0380:c:3/5 z:51/71 - control inhibitor/80	17.24															2020JUL12 U73122 7.5uM trial3 F-actin PARD6B GATA3 DAPI BF.lif - DMSO/250:0206-0226-0396:c:1/5 z:43/74 - DMSO/250	25.6	20.6	1.91473	1.24022												2020JUL12 U73122 7.5uM trial3 F-actin PARD6B GATA3 DAPI BF.lif - U73122 7.5uM/238:0166-0361-0223:c:1/5 z:34/87 - U73122 7.5uM/238	25.59	13.42
20181227 c1 phalloidin c2 pard6 c3 gata3.lif - control inhibitor/80:0253-0414-0413:c:3/5 z:51/71 - control inhibitor/80	22.06															2020JUL12 U73122 7.5uM trial3 F-actin PARD6B GATA3 DAPI BF.lif - DMSO/250:0206-0291-0372:c:1/5 z:43/74 - DMSO/250	18.17	14.46														2020JUL12 U73122 7.5uM trial3 F-actin PARD6B GATA3 DAPI BF.lif - U73122 7.5uM/238:0166-0253-0349:c:1/5 z:34/87 - U73122 7.5uM/238	32.56	18.87
Embryo 79																2020JUL12 U73122 7.5uM trial3 F-actin PARD6B GATA3 DAPI BF.lif - DMSO/250:0206-0335-0385:c:1/5 z:43/74 - DMSO/250	13.37	16.61														2020JUL12 U73122 7.5uM trial3 F-actin PARD6B GATA3 DAPI BF.lif - U73122 7.5uM/238:0101-0584-0349:c:1/5 z:21/87 - U73122 7.5uM/238	19.57	56.71	0.697186	0.677741
20181227 c1 phalloidin c2 pard6 c3 gata3.lif - control inhibitor/79:0163-0524-0652:c:3/5 z:33/79 - control inhibitor/79	67.47	41.71	0.97205	1.12244	1.00618	1.21362										2020JUL12 U73122 7.5uM trial3 F-actin PARD6B GATA3 DAPI BF.lif - DMSO/250:0206-0175-0597:c:1/5 z:43/74 - DMSO/250	26.55	25.5	2.16735	1.48862												2020JUL12 U73122 7.5uM trial3 F-actin PARD6B GATA3 DAPI BF.lif - U73122 7.5uM/238:0101-0591-0407:c:1/5 z:21/87 - U73122 7.5uM/238	17.9	13.46
20181227 c1 phalloidin c2 pard6 c3 gata3.lif - control inhibitor/79:0163-0568-0678:c:3/5 z:33/79 - control inhibitor/79	45.15	40.04														2020JUL12 U73122 7.5uM trial3 F-actin PARD6B GATA3 DAPI BF.lif - DMSO/250:0206-0263-0640:c:1/5 z:43/74 - DMSO/250	9.63	15.72														2020JUL12 U73122 7.5uM trial3 F-actin PARD6B GATA3 DAPI BF.lif - U73122 7.5uM/238:0101-0526-0447:c:1/5 z:21/87 - U73122 7.5uM/238	28.07	29
20181227 c1 phalloidin c2 pard6 c3 gata3.lif - control inhibitor/79:0163-0499-0551:c:3/5 z:33/79 - control inhibitor/79	69.41	37.16														2020JUL12 U73122 7.5uM trial3 F-actin PARD6B GATA3 DAPI BF.lif - DMSO/250:0206-0286-0666:c:1/5 z:43/74 - DMSO/250	12.25	17.13														2020JUL12 U73122 7.5uM trial3 F-actin PARD6B GATA3 DAPI BF.lif - U73122 7.5uM/238:0101-0687-0603:c:1/5 z:21/87 - U73122 7.5uM/238	27.34	51.9	0.775603	0.609455
20181227 c1 phalloidin c2 pard6 c3 gata3.lif - control inhibitor/79:0183-0259-0604:c:3/5 z:37/79 - control inhibitor/79	38.94	47.36	0.911944	1.42866												2020JUL12 U73122 7.5uM trial3 F-actin PARD6B GATA3 DAPI BF.lif - DMSO/250:0261-0306-0785:c:1/5 z:54/74 - DMSO/250	17.49	18.97	1.73684	1.36279												2020JUL12 U73122 7.5uM trial3 F-actin PARD6B GATA3 DAPI BF.lif - U73122 7.5uM/238:0101-0705-0660:c:1/5 z:21/87 - U73122 7.5uM/238	34.11	13.19
20181227 c1 phalloidin c2 pard6 c3 gata3.lif - control inhibitor/79:0183-0275-0647:c:3/5 z:37/79 - control inhibitor/79	31.61	42.58														2020JUL12 U73122 7.5uM trial3 F-actin PARD6B GATA3 DAPI BF.lif - DMSO/250:0261-0374-0760:c:1/5 z:54/74 - DMSO/250	9.75	12.3														2020JUL12 U73122 7.5uM trial3 F-actin PARD6B GATA3 DAPI BF.lif - U73122 7.5uM/238:0101-0668-0686:c:1/5 z:21/87 - U73122 7.5uM/238	35.25	7.19
20181227 c1 phalloidin c2 pard6 c3 gata3.lif - control inhibitor/79:0183-0347-0577:c:3/5 z:37/79 - control inhibitor/79	42.7	33.15														2020JUL12 U73122 7.5uM trial3 F-actin PARD6B GATA3 DAPI BF.lif - DMSO/250:0261-0417-0695:c:1/5 z:54/74 - DMSO/250	10.07	13.92														2020JUL12 U73122 7.5uM trial3 F-actin PARD6B GATA3 DAPI BF.lif - U73122 7.5uM/238:0226-0729-0372:c:1/5 z:46/87 - U73122 7.5uM/238	21.41	35.15	1.65969	1.04036
20181227 c1 phalloidin c2 pard6 c3 gata3.lif - control inhibitor/79:0123-0315-0443:c:3/5 z:23/79 - control inhibitor/79	37.36	42.19	0.757348	0.906143												2020JUL12 U73122 7.5uM trial3 F-actin PARD6B GATA3 DAPI BF.lif - DMSO/250:0261-0510-0796:c:1/5 z:54/74 - DMSO/250	14.09	15.36	1.88117	1.16276												2020JUL12 U73122 7.5uM trial3 F-actin PARD6B GATA3 DAPI BF.lif - U73122 7.5uM/238:0226-0659-0396:c:1/5 z:46/87 - U73122 7.5uM/238	8.45	14.45
20181227 c1 phalloidin c2 pard6 c3 gata3.lif - control inhibitor/79:0123-0315-0432:c:3/5 z:23/79 - control inhibitor/79	49.02	41.84														2020JUL12 U73122 7.5uM trial3 F-actin PARD6B GATA3 DAPI BF.lif - DMSO/250:0261-0515-0729:c:1/5 z:54/74 - DMSO/250	8.77	11.27														2020JUL12 U73122 7.5uM trial3 F-actin PARD6B GATA3 DAPI BF.lif - U73122 7.5uM/238:0226-0573-0317:c:1/5 z:46/87 - U73122 7.5uM/238	12.9	23.72
20181227 c1 phalloidin c2 pard6 c3 gata3.lif - control inhibitor/79:0123-0365-0479:c:3/5 z:23/79 - control inhibitor/79	49.33	46.56														2020JUL12 U73122 7.5uM trial3 F-actin PARD6B GATA3 DAPI BF.lif - DMSO/250:0261-0419-0693:c:1/5 z:54/74 - DMSO/250	7.49	13.21														2020JUL12 U73122 7.5uM trial3 F-actin PARD6B GATA3 DAPI BF.lif - U73122 7.5uM/238:0226-0560-0194:c:1/5 z:46/87 - U73122 7.5uM/238	18.1	44.73	1.37747	1.07842
20181227 c1 phalloidin c2 pard6 c3 gata3.lif - control inhibitor/79:0193-0256-0597:c:3/5 z:39/79 - control inhibitor/79	42.51	38.07	1.15047	1.04016																												2020JUL12 U73122 7.5uM trial3 F-actin PARD6B GATA3 DAPI BF.lif - U73122 7.5uM/238:0226-0545-0209:c:1/5 z:46/87 - U73122 7.5uM/238	10.32	16.91
20181227 c1 phalloidin c2 pard6 c3 gata3.lif - control inhibitor/79:0193-0273-0630:c:3/5 z:39/79 - control inhibitor/79	45.93	40.81																														2020JUL12 U73122 7.5uM trial3 F-actin PARD6B GATA3 DAPI BF.lif - U73122 7.5uM/238:0226-0426-0246:c:1/5 z:46/87 - U73122 7.5uM/238	13.14	18.54
20181227 c1 phalloidin c2 pard6 c3 gata3.lif - control inhibitor/79:0193-0354-0581:c:3/5 z:39/79 - control inhibitor/79	36.95	36.6																														2020JUL12 U73122 7.5uM trial3 F-actin PARD6B GATA3 DAPI BF.lif - U73122 7.5uM/238:0121-0699-0600:c:1/5 z:25/87 - U73122 7.5uM/238	26.32	52.01	0.693544	0.651638
20181227 c1 phalloidin c2 pard6 c3 gata3.lif - control inhibitor/79:0143-0307-0427:c:3/5 z:29/79 - control inhibitor/79	67.88	52.79	1.21388	1.5891																												2020JUL12 U73122 7.5uM trial3 F-actin PARD6B GATA3 DAPI BF.lif - U73122 7.5uM/238:0121-0704-0637:c:1/5 z:25/87 - U73122 7.5uM/238	33.57	17.53
20181227 c1 phalloidin c2 pard6 c3 gata3.lif - control inhibitor/79:0143-0304-0436:c:3/5 z:29/79 - control inhibitor/79	50.24	32.97																														2020JUL12 U73122 7.5uM trial3 F-actin PARD6B GATA3 DAPI BF.lif - U73122 7.5uM/238:0121-0477-0603:c:1/5 z:25/87 - U73122 7.5uM/238	37.95	15.25
20181227 c1 phalloidin c2 pard6 c3 gata3.lif - control inhibitor/79:0143-0329-0471:c:3/5 z:29/79 - control inhibitor/79	55.92	33.22																														2020JUL12 U73122 7.5uM trial3 F-actin PARD6B GATA3 DAPI BF.lif - U73122 7.5uM/238:0066-0413-0600:c:1/5 z:14/87 - U73122 7.5uM/238	31.86	54.7	0.41425	1.12687
20181227 c1 phalloidin c2 pard6 c3 gata3.lif - control inhibitor/79:0143-0489-0275:c:3/5 z:29/79 - control inhibitor/79	69.03	25.18	1.03138	0.942718																												2020JUL12 U73122 7.5uM trial3 F-actin PARD6B GATA3 DAPI BF.lif - U73122 7.5uM/238:0066-0502-0572:c:1/5 z:14/87 - U73122 7.5uM/238	33.62	10.49
20181227 c1 phalloidin c2 pard6 c3 gata3.lif - control inhibitor/79:0143-0494-0267:c:3/5 z:29/79 - control inhibitor/79	48.86	24.57																														2020JUL12 U73122 7.5uM trial3 F-actin PARD6B GATA3 DAPI BF.lif - U73122 7.5uM/238:0066-0535-0585:c:1/5 z:14/87 - U73122 7.5uM/238	76.91	18.99
20181227 c1 phalloidin c2 pard6 c3 gata3.lif - control inhibitor/79:0143-0492-0389:c:3/5 z:29/79 - control inhibitor/79	66.93	26.71																														Embryo 232
apical		35.9		1.53157																												2020JUL12 U73122 7.5uM trial3 F-actin PARD6B GATA3 DAPI BF.lif - U73122 7.5uM/232-1:0018-0583-0687:c:1/5 z:18/74 - U73122 7.5uM/232	41.73	74.47	1.28916	1.70067	1.83834	1.38536
cytoplasm		22.16																														2020JUL12 U73122 7.5uM trial3 F-actin PARD6B GATA3 DAPI BF.lif - U73122 7.5uM/232-1:0018-0569-0602:c:1/5 z:18/74 - U73122 7.5uM/232	14.2	30.31
basal		23.44																														2020JUL12 U73122 7.5uM trial3 F-actin PARD6B GATA3 DAPI BF.lif - U73122 7.5uM/232-1:0018-0562-0569:c:1/5 z:18/74 - U73122 7.5uM/232	32.37	41.32
apical		31		1.14815																												2020JUL12 U73122 7.5uM trial3 F-actin PARD6B GATA3 DAPI BF.lif - U73122 7.5uM/232-1:0014-0674-0488:c:1/5 z:14/74 - U73122 7.5uM/232	104.85	10.25	1.90325	1.1005
cytoplasm		21.24																														2020JUL12 U73122 7.5uM trial3 F-actin PARD6B GATA3 DAPI BF.lif - U73122 7.5uM/232-1:0014-0598-0514:c:1/5 z:14/74 - U73122 7.5uM/232	18.44	10.8
basal		27																														2020JUL12 U73122 7.5uM trial3 F-actin PARD6B GATA3 DAPI BF.lif - U73122 7.5uM/232-1:0014-0453-0382:c:1/5 z:14/74 - U73122 7.5uM/232	55.09	13.5
Embryo 78																																2020JUL12 U73122 7.5uM trial3 F-actin PARD6B GATA3 DAPI BF.lif - U73122 7.5uM/232-1:0029-0342-0556:c:1/5 z:29/74 - U73122 7.5uM/232	44.33	57.65	3.71896	1.04197
20181227 c1 phalloidin c2 pard6 c3 gata3.lif - control inhibitor/77:0183-0550-0219:c:3/5 z:37/79 - control inhibitor/77	34.18	15.35	1.58977	0.711307	1.26653	0.905556																										2020JUL12 U73122 7.5uM trial3 F-actin PARD6B GATA3 DAPI BF.lif - U73122 7.5uM/232-1:0029-0389-0629:c:1/5 z:29/74 - U73122 7.5uM/232	18.76	11.27
20181227 c1 phalloidin c2 pard6 c3 gata3.lif - control inhibitor/77:0183-0551-0227:c:3/5 z:37/79 - control inhibitor/77	17.56	17.59																														2020JUL12 U73122 7.5uM trial3 F-actin PARD6B GATA3 DAPI BF.lif - U73122 7.5uM/232-1:0029-0431-0564:c:1/5 z:29/74 - U73122 7.5uM/232	11.92	18.89
20181227 c1 phalloidin c2 pard6 c3 gata3.lif - control inhibitor/77:0183-0545-0335:c:3/5 z:37/79 - control inhibitor/77	21.5	21.58																														2020JUL12 U73122 7.5uM trial3 F-actin PARD6B GATA3 DAPI BF.lif - U73122 7.5uM/232-1:0029-0730-0514:c:1/5 z:29/74 - U73122 7.5uM/232	55.53	28.37	1.4476	1.2782
20181227 c1 phalloidin c2 pard6 c3 gata3.lif - control inhibitor/77:0183-0702-0346:c:3/5 z:37/79 - control inhibitor/77	21.61	19.46	1.16622	0.836989																												2020JUL12 U73122 7.5uM trial3 F-actin PARD6B GATA3 DAPI BF.lif - U73122 7.5uM/232-1:0029-0695-0526:c:1/5 z:29/74 - U73122 7.5uM/232	13.91	14.94
20181227 c1 phalloidin c2 pard6 c3 gata3.lif - control inhibitor/77:0183-0661-0410:c:3/5 z:37/79 - control inhibitor/77	15.05	22.05																														2020JUL12 U73122 7.5uM trial3 F-actin PARD6B GATA3 DAPI BF.lif - U73122 7.5uM/232-1:0029-0701-0601:c:1/5 z:29/74 - U73122 7.5uM/232	38.36	7.89
20181227 c1 phalloidin c2 pard6 c3 gata3.lif - control inhibitor/77:0183-0636-0468:c:3/5 z:37/79 - control inhibitor/77	18.53	23.25																														2020JUL12 U73122 7.5uM trial3 F-actin PARD6B GATA3 DAPI BF.lif - U73122 7.5uM/232-1:0045-0367-0351:c:1/5 z:45/74 - U73122 7.5uM/232	12.76	24.3	1.62548	2.20841
20181227 c1 phalloidin c2 pard6 c3 gata3.lif - control inhibitor/77:0133-0707-0503:c:3/5 z:27/79 - control inhibitor/77	33.54	14.77	1.84387	1.02784																												2020JUL12 U73122 7.5uM trial3 F-actin PARD6B GATA3 DAPI BF.lif - U73122 7.5uM/232-1:0045-0382-0382:c:1/5 z:45/74 - U73122 7.5uM/232	5.66	8.62
20181227 c1 phalloidin c2 pard6 c3 gata3.lif - control inhibitor/77:0133-0670-0537:c:3/5 z:27/79 - control inhibitor/77	9.74	15.85																														2020JUL12 U73122 7.5uM trial3 F-actin PARD6B GATA3 DAPI BF.lif - U73122 7.5uM/232-1:0045-0473-0399:c:1/5 z:45/74 - U73122 7.5uM/232	7.85	25.23
20181227 c1 phalloidin c2 pard6 c3 gata3.lif - control inhibitor/77:0133-0572-0598:c:3/5 z:27/79 - control inhibitor/77	18.19	14.37																														2020JUL12 U73122 7.5uM trial3 F-actin PARD6B GATA3 DAPI BF.lif - U73122 7.5uM/232-1:0045-0531-0314:c:1/5 z:45/74 - U73122 7.5uM/232	12.15	26.07	1.5557	1.18202
20181227 c1 phalloidin c2 pard6 c3 gata3.lif - control inhibitor/77:0173-0544-0711:c:3/5 z:35/79 - control inhibitor/77	18.65	8.5	0.84009	0.628234																												2020JUL12 U73122 7.5uM trial3 F-actin PARD6B GATA3 DAPI BF.lif - U73122 7.5uM/232-1:0045-0537-0363:c:1/5 z:45/74 - U73122 7.5uM/232	5.33	13.67
20181227 c1 phalloidin c2 pard6 c3 gata3.lif - control inhibitor/77:0173-0549-0669:c:3/5 z:35/79 - control inhibitor/77	13.6	13.5																														2020JUL12 U73122 7.5uM trial3 F-actin PARD6B GATA3 DAPI BF.lif - U73122 7.5uM/232-1:0045-0457-0394:c:1/5 z:45/74 - U73122 7.5uM/232	7.81	19.56
20181227 c1 phalloidin c2 pard6 c3 gata3.lif - control inhibitor/77:0173-0599-0597:c:3/5 z:35/79 - control inhibitor/77	22.2	13.53																														2020JUL12 U73122 7.5uM trial3 F-actin PARD6B GATA3 DAPI BF.lif - U73122 7.5uM/232-1:0045-0223-0530:c:1/5 z:45/74 - U73122 7.5uM/232	9.51	49.63	1.32821	1.18572
20181227 c1 phalloidin c2 pard6 c3 gata3.lif - control inhibitor/77:0103-0430-0360:c:3/5 z:21/79 - control inhibitor/77	34.44	20.46	0.892691	1.32342																												2020JUL12 U73122 7.5uM trial3 F-actin PARD6B GATA3 DAPI BF.lif - U73122 7.5uM/232-1:0045-0271-0527:c:1/5 z:45/74 - U73122 7.5uM/232	3.08	15.26
20181227 c1 phalloidin c2 pard6 c3 gata3.lif - control inhibitor/77:0103-0435-0397:c:3/5 z:21/79 - control inhibitor/77	23.36	19.98																														2020JUL12 U73122 7.5uM trial3 F-actin PARD6B GATA3 DAPI BF.lif - U73122 7.5uM/232-1:0045-0324-0476:c:1/5 z:45/74 - U73122 7.5uM/232	7.16	28.03
20181227 c1 phalloidin c2 pard6 c3 gata3.lif - control inhibitor/77:0103-0510-0443:c:3/5 z:21/79 - control inhibitor/77	38.58	15.46																														Embryo 230
Embryo 118																																2020JUL12 U73122 7.5uM trial3 F-actin PARD6B GATA3 DAPI BF.lif - U73122 7.5uM/230:0030-0352-0567:c:1/5 z:30/81 - U73122 7.5uM/230	38.7	51.8	2.43549	0.849472	2.93289	1.0863
190406 Ctrl DMSO Inhibitor C1 DAPI C2 BF C3 Factin C4 Gata3 C5 Pard6.lif - ctrl/rescan control/118 rescan:0183-0355-0253:c:3/5 z:37/61 - ctrl/rescan control/118 rescan	18.82	45.99	2.16571	1.67419	2.36991	1.72854																										2020JUL12 U73122 7.5uM trial3 F-actin PARD6B GATA3 DAPI BF.lif - U73122 7.5uM/230:0030-0374-0534:c:1/5 z:30/81 - U73122 7.5uM/230	18.9	21.17
190406 Ctrl DMSO Inhibitor C1 DAPI C2 BF C3 Factin C4 Gata3 C5 Pard6.lif - ctrl/rescan control/118 rescan:0183-0361-0247:c:3/5 z:37/61 - ctrl/rescan control/118 rescan	10.65	25.51																														2020JUL12 U73122 7.5uM trial3 F-actin PARD6B GATA3 DAPI BF.lif - U73122 7.5uM/230:0030-0466-0607:c:1/5 z:30/81 - U73122 7.5uM/230	15.89	17.8
190406 Ctrl DMSO Inhibitor C1 DAPI C2 BF C3 Factin C4 Gata3 C5 Pard6.lif - ctrl/rescan control/118 rescan:0183-0379-0292:c:3/5 z:37/61 - ctrl/rescan control/118 rescan	8.69	27.47																														2020JUL12 U73122 7.5uM trial3 F-actin PARD6B GATA3 DAPI BF.lif - U73122 7.5uM/230:0030-0521-0689:c:1/5 z:30/81 - U73122 7.5uM/230	24.55	21.91	1.64544	0.776155
190406 Ctrl DMSO Inhibitor C1 DAPI C2 BF C3 Factin C4 Gata3 C5 Pard6.lif - ctrl/rescan control/118 rescan:0183-0252-0450:c:3/5 z:37/61 - ctrl/rescan control/118 rescan	31.61	52.9	2.14305	1.8653																												2020JUL12 U73122 7.5uM trial3 F-actin PARD6B GATA3 DAPI BF.lif - U73122 7.5uM/230:0030-0547-0615:c:1/5 z:30/81 - U73122 7.5uM/230	17.15	17.28
190406 Ctrl DMSO Inhibitor C1 DAPI C2 BF C3 Factin C4 Gata3 C5 Pard6.lif - ctrl/rescan control/118 rescan:0183-0292-0447:c:3/5 z:37/61 - ctrl/rescan control/118 rescan	7.58	23.6																														2020JUL12 U73122 7.5uM trial3 F-actin PARD6B GATA3 DAPI BF.lif - U73122 7.5uM/230:0030-0470-0604:c:1/5 z:30/81 - U73122 7.5uM/230	14.92	16.76
190406 Ctrl DMSO Inhibitor C1 DAPI C2 BF C3 Factin C4 Gata3 C5 Pard6.lif - ctrl/rescan control/118 rescan:0183-0342-0509:c:3/5 z:37/61 - ctrl/rescan control/118 rescan	14.75	28.36																														2020JUL12 U73122 7.5uM trial3 F-actin PARD6B GATA3 DAPI BF.lif - U73122 7.5uM/230:0031-0288-0361:c:1/5 z:31/81 - U73122 7.5uM/230	54.35	37.26	3.96426	0.984293
190406 Ctrl DMSO Inhibitor C1 DAPI C2 BF C3 Factin C4 Gata3 C5 Pard6.lif - ctrl/rescan control/118 rescan:0183-0293-0554:c:3/5 z:37/61 - ctrl/rescan control/118 rescan	63.45	56.43	4.57462	2.19657																												2020JUL12 U73122 7.5uM trial3 F-actin PARD6B GATA3 DAPI BF.lif - U73122 7.5uM/230:0031-0316-0322:c:1/5 z:31/81 - U73122 7.5uM/230	10.5	8.53
190406 Ctrl DMSO Inhibitor C1 DAPI C2 BF C3 Factin C4 Gata3 C5 Pard6.lif - ctrl/rescan control/118 rescan:0183-0329-0544:c:3/5 z:37/61 - ctrl/rescan control/118 rescan	17.03	26.21																														2020JUL12 U73122 7.5uM trial3 F-actin PARD6B GATA3 DAPI BF.lif - U73122 7.5uM/230:0031-0365-0305:c:1/5 z:31/81 - U73122 7.5uM/230	13.71	11.84
190406 Ctrl DMSO Inhibitor C1 DAPI C2 BF C3 Factin C4 Gata3 C5 Pard6.lif - ctrl/rescan control/118 rescan:0183-0338-0518:c:3/5 z:37/61 - ctrl/rescan control/118 rescan	13.87	25.69																														2020JUL12 U73122 7.5uM trial3 F-actin PARD6B GATA3 DAPI BF.lif - U73122 7.5uM/230:0037-0434-0182:c:1/5 z:37/81 - U73122 7.5uM/230	29.57	62.72	3.80566	0.901825
190406 Ctrl DMSO Inhibitor C1 DAPI C2 BF C3 Factin C4 Gata3 C5 Pard6.lif - ctrl/rescan control/118 rescan:0183-0438-0732:c:3/5 z:37/61 - ctrl/rescan control/118 rescan	25.85	31.33	2.43638	1.40367																												2020JUL12 U73122 7.5uM trial3 F-actin PARD6B GATA3 DAPI BF.lif - U73122 7.5uM/230:0037-0485-0145:c:1/5 z:37/81 - U73122 7.5uM/230	12.99	17.13
190406 Ctrl DMSO Inhibitor C1 DAPI C2 BF C3 Factin C4 Gata3 C5 Pard6.lif - ctrl/rescan control/118 rescan:0183-0474-0761:c:3/5 z:37/61 - ctrl/rescan control/118 rescan	11.22	22.38																														2020JUL12 U73122 7.5uM trial3 F-actin PARD6B GATA3 DAPI BF.lif - U73122 7.5uM/230:0037-0566-0230:c:1/5 z:37/81 - U73122 7.5uM/230	7.77	28.46
190406 Ctrl DMSO Inhibitor C1 DAPI C2 BF C3 Factin C4 Gata3 C5 Pard6.lif - ctrl/rescan control/118 rescan:0183-0527-0696:c:3/5 z:37/61 - ctrl/rescan control/118 rescan	10.61	22.32																														2020JUL12 U73122 7.5uM trial3 F-actin PARD6B GATA3 DAPI BF.lif - U73122 7.5uM/230:0043-0706-0216:c:1/5 z:43/81 - U73122 7.5uM/230	27.03	38.39	3.8232	1.26597
190406 Ctrl DMSO Inhibitor C1 DAPI C2 BF C3 Factin C4 Gata3 C5 Pard6.lif - ctrl/rescan control/118 rescan:0183-0782-0648:c:3/5 z:37/61 - ctrl/rescan control/118 rescan	13.58	32.27	1.18603	1.43104																												2020JUL12 U73122 7.5uM trial3 F-actin PARD6B GATA3 DAPI BF.lif - U73122 7.5uM/230:0043-0716-0286:c:1/5 z:43/81 - U73122 7.5uM/230	13.94	15.73
190406 Ctrl DMSO Inhibitor C1 DAPI C2 BF C3 Factin C4 Gata3 C5 Pard6.lif - ctrl/rescan control/118 rescan:0183-0762-0664:c:3/5 z:37/61 - ctrl/rescan control/118 rescan	8.39	21.69																														2020JUL12 U73122 7.5uM trial3 F-actin PARD6B GATA3 DAPI BF.lif - U73122 7.5uM/230:0043-0578-0198:c:1/5 z:43/81 - U73122 7.5uM/230	7.07	18.51
190406 Ctrl DMSO Inhibitor C1 DAPI C2 BF C3 Factin C4 Gata3 C5 Pard6.lif - ctrl/rescan control/118 rescan:0183-0798-0519:c:3/5 z:37/61 - ctrl/rescan control/118 rescan	11.45	22.55																														2020JUL12 U73122 7.5uM trial3 F-actin PARD6B GATA3 DAPI BF.lif - U73122 7.5uM/230:0024-0629-0622:c:1/5 z:24/81 - U73122 7.5uM/230	36.6	46.67	1.92328	1.74006
190406 Ctrl DMSO Inhibitor C1 DAPI C2 BF C3 Factin C4 Gata3 C5 Pard6.lif - ctrl/rescan control/118 rescan:0183-0695-0254:c:3/5 z:37/61 - ctrl/rescan control/118 rescan	27.71	33.63	1.71367	1.37602																												2020JUL12 U73122 7.5uM trial3 F-actin PARD6B GATA3 DAPI BF.lif - U73122 7.5uM/230:0116-0673-0598:c:1/5 z:24/81 - U73122 7.5uM/230	16.4	8.77
190406 Ctrl DMSO Inhibitor C1 DAPI C2 BF C3 Factin C4 Gata3 C5 Pard6.lif - ctrl/rescan control/118 rescan:0183-0700-0280:c:3/5 z:37/61 - ctrl/rescan control/118 rescan	8	22.09																														2020JUL12 U73122 7.5uM trial3 F-actin PARD6B GATA3 DAPI BF.lif - U73122 7.5uM/230:0116-0594-0595:c:1/5 z:24/81 - U73122 7.5uM/230	19.03	35.91
190406 Ctrl DMSO Inhibitor C1 DAPI C2 BF C3 Factin C4 Gata3 C5 Pard6.lif - ctrl/rescan control/118 rescan:0183-0695-0325:c:3/5 z:37/61 - ctrl/rescan control/118 rescan	16.17	24.44																														Embryo 229
apical		60.93		2.153																												2020JUL12 U73122 7.5uM trial3 F-actin PARD6B GATA3 DAPI BF.lif - U73122 7.5uM/229:0111-0328-0615:c:1/5 z:23/73 - U73122 7.5uM/229	22.01	53.21	1.55	1.56171	2.05722	1.21668
cytoplasm		30.13																														2020JUL12 U73122 7.5uM trial3 F-actin PARD6B GATA3 DAPI BF.lif - U73122 7.5uM/229:0111-0366-0597:c:1/5 z:23/73 - U73122 7.5uM/229	18.2	20.17
basal		28.3																														2020JUL12 U73122 7.5uM trial3 F-actin PARD6B GATA3 DAPI BF.lif - U73122 7.5uM/229:0111-0465-0525:c:1/5 z:23/73 - U73122 7.5uM/229	14.2	27.55
Embryo 115																																2020JUL12 U73122 7.5uM trial3 F-actin PARD6B GATA3 DAPI BF.lif - U73122 7.5uM/229:0131-0558-0260:c:1/5 z:27/73 - U73122 7.5uM/229	37.55	71.99	2.16302	1.48624
190406 Ctrl DMSO Inhibitor C1 DAPI C2 BF C3 Factin C4 Gata3 C5 Pard6.lif - ctrl/rescan control/115 rescan:0158-0186-0351:c:3/5 z:32/67 - ctrl/rescan control/115 rescan	25.07	53.53	1.9881	1.82199	2.5649	1.83142																										2020JUL12 U73122 7.5uM trial3 F-actin PARD6B GATA3 DAPI BF.lif - U73122 7.5uM/229:0131-0519-0224:c:1/5 z:27/73 - U73122 7.5uM/229	27.13	17.86
190406 Ctrl DMSO Inhibitor C1 DAPI C2 BF C3 Factin C4 Gata3 C5 Pard6.lif - ctrl/rescan control/115 rescan:0158-0217-0361:c:3/5 z:32/67 - ctrl/rescan control/115 rescan	9.36	25.06																														2020JUL12 U73122 7.5uM trial3 F-actin PARD6B GATA3 DAPI BF.lif - U73122 7.5uM/229:0131-0435-0395:c:1/5 z:27/73 - U73122 7.5uM/229	17.36	21.69
190406 Ctrl DMSO Inhibitor C1 DAPI C2 BF C3 Factin C4 Gata3 C5 Pard6.lif - ctrl/rescan control/115 rescan:0158-0263-0334:c:3/5 z:32/67 - ctrl/rescan control/115 rescan	12.61	29.38																														2020JUL12 U73122 7.5uM trial3 F-actin PARD6B GATA3 DAPI BF.lif - U73122 7.5uM/229:0161-0783-0461:c:1/5 z:33/73 - U73122 7.5uM/229	34.26	46.93	4.62348	0.917555
190406 Ctrl DMSO Inhibitor C1 DAPI C2 BF C3 Factin C4 Gata3 C5 Pard6.lif - ctrl/rescan control/115 rescan:0158-0255-0249:c:3/5 z:32/67 - ctrl/rescan control/115 rescan	27.65	57.17	2.31963	1.68544																												2020JUL12 U73122 7.5uM trial3 F-actin PARD6B GATA3 DAPI BF.lif - U73122 7.5uM/229:0161-0750-0501:c:1/5 z:33/73 - U73122 7.5uM/229	15.99	17.54
190406 Ctrl DMSO Inhibitor C1 DAPI C2 BF C3 Factin C4 Gata3 C5 Pard6.lif - ctrl/rescan control/115 rescan:0158-0316-0242:c:3/5 z:32/67 - ctrl/rescan control/115 rescan	10.85	33.23																														2020JUL12 U73122 7.5uM trial3 F-actin PARD6B GATA3 DAPI BF.lif - U73122 7.5uM/229:0161-0649-0415:c:1/5 z:33/73 - U73122 7.5uM/229	7.41	24.65
190406 Ctrl DMSO Inhibitor C1 DAPI C2 BF C3 Factin C4 Gata3 C5 Pard6.lif - ctrl/rescan control/115 rescan:0158-0263-0334:c:3/5 z:32/67 - ctrl/rescan control/115 rescan	11.92	33.92																														2020JUL12 U73122 7.5uM trial3 F-actin PARD6B GATA3 DAPI BF.lif - U73122 7.5uM/229:0091-0334-0625:c:1/5 z:19/73 - U73122 7.5uM/229	19.3	45.19	0.832974	1.3807
190406 Ctrl DMSO Inhibitor C1 DAPI C2 BF C3 Factin C4 Gata3 C5 Pard6.lif - ctrl/rescan control/115 rescan:0158-0487-0236:c:3/5 z:32/67 - ctrl/rescan control/115 rescan	22.44	62.48	1.5307	1.87403																												2020JUL12 U73122 7.5uM trial3 F-actin PARD6B GATA3 DAPI BF.lif - U73122 7.5uM/229:0091-0397-0596:c:1/5 z:19/73 - U73122 7.5uM/229	11.56	14.13
190406 Ctrl DMSO Inhibitor C1 DAPI C2 BF C3 Factin C4 Gata3 C5 Pard6.lif - ctrl/rescan control/115 rescan:0158-0504-0278:c:3/5 z:32/67 - ctrl/rescan control/115 rescan	8.63	24.18																														2020JUL12 U73122 7.5uM trial3 F-actin PARD6B GATA3 DAPI BF.lif - U73122 7.5uM/229:0091-0454-0509:c:1/5 z:19/73 - U73122 7.5uM/229	23.17	21.69
190406 Ctrl DMSO Inhibitor C1 DAPI C2 BF C3 Factin C4 Gata3 C5 Pard6.lif - ctrl/rescan control/115 rescan:0158-0395-0272:c:3/5 z:32/67 - ctrl/rescan control/115 rescan	14.66	33.34																														2020JUL12 U73122 7.5uM trial3 F-actin PARD6B GATA3 DAPI BF.lif - U73122 7.5uM/229:0171-0263-0272:c:1/5 z:35/73 - U73122 7.5uM/229	22.12	45	1.11661	0.737192
190406 Ctrl DMSO Inhibitor C1 DAPI C2 BF C3 Factin C4 Gata3 C5 Pard6.lif - ctrl/rescan control/115 rescan:0158-0625-0319:c:3/5 z:32/67 - ctrl/rescan control/115 rescan	75.48	47.71	4.57455	1.70759																												2020JUL12 U73122 7.5uM trial3 F-actin PARD6B GATA3 DAPI BF.lif - U73122 7.5uM/229:0171-0272-0318:c:1/5 z:35/73 - U73122 7.5uM/229	11.38	11.49
190406 Ctrl DMSO Inhibitor C1 DAPI C2 BF C3 Factin C4 Gata3 C5 Pard6.lif - ctrl/rescan control/115 rescan:0158-0567-0361:c:3/5 z:32/67 - ctrl/rescan control/115 rescan	10.85	25.33																														2020JUL12 U73122 7.5uM trial3 F-actin PARD6B GATA3 DAPI BF.lif - U73122 7.5uM/229:0171-0349-0269:c:1/5 z:35/73 - U73122 7.5uM/229	19.81	19.4
190406 Ctrl DMSO Inhibitor C1 DAPI C2 BF C3 Factin C4 Gata3 C5 Pard6.lif - ctrl/rescan control/115 rescan:0158-0535-0315:c:3/5 z:32/67 - ctrl/rescan control/115 rescan	16.5	27.94																														Embryo 227
190406 Ctrl DMSO Inhibitor C1 DAPI C2 BF C3 Factin C4 Gata3 C5 Pard6.lif - ctrl/rescan control/115 rescan:0158-0653-0666:c:3/5 z:32/67 - ctrl/rescan control/115 rescan	37.28	47.53	3.2055	2.46014																												2020JUL12 U73122 7.5uM trial3 F-actin PARD6B GATA3 DAPI BF.lif - U73122 7.5uM/227:0121-0314-0682:c:1/5 z:26/70 - U73122 7.5uM/227	104.35	11.99	7.5343	2.19746	2.84074	1.49371
190406 Ctrl DMSO Inhibitor C1 DAPI C2 BF C3 Factin C4 Gata3 C5 Pard6.lif - ctrl/rescan control/115 rescan:0158-0649-0647:c:3/5 z:32/67 - ctrl/rescan control/115 rescan	10.64	28.36																														2020JUL12 U73122 7.5uM trial3 F-actin PARD6B GATA3 DAPI BF.lif - U73122 7.5uM/227:0121-0375-0694:c:1/5 z:26/70 - U73122 7.5uM/227	28.3	11.89
190406 Ctrl DMSO Inhibitor C1 DAPI C2 BF C3 Factin C4 Gata3 C5 Pard6.lif - ctrl/rescan control/115 rescan:0158-0558-0712:c:3/5 z:32/67 - ctrl/rescan control/115 rescan	11.63	19.32																														2020JUL12 U73122 7.5uM trial3 F-actin PARD6B GATA3 DAPI BF.lif - U73122 7.5uM/227:0121-0429-0646:c:1/5 z:26/70 - U73122 7.5uM/227	13.85	8.83
190406 Ctrl DMSO Inhibitor C1 DAPI C2 BF C3 Factin C4 Gata3 C5 Pard6.lif - ctrl/rescan control/115 rescan:0158-0568-0768:c:3/5 z:32/67 - ctrl/rescan control/115 rescan	21.8	42.78	1.77092	1.72918																												2020JUL12 U73122 7.5uM trial3 F-actin PARD6B GATA3 DAPI BF.lif - U73122 7.5uM/227:0121-0270-0579:c:1/5 z:26/70 - U73122 7.5uM/227	55.08	23.62	2.80877	1.91908
190406 Ctrl DMSO Inhibitor C1 DAPI C2 BF C3 Factin C4 Gata3 C5 Pard6.lif - ctrl/rescan control/115 rescan:0158-0532-0765:c:3/5 z:32/67 - ctrl/rescan control/115 rescan	10.51	21.59																														2020JUL12 U73122 7.5uM trial3 F-actin PARD6B GATA3 DAPI BF.lif - U73122 7.5uM/227:0121-0319-0624:c:1/5 z:26/70 - U73122 7.5uM/227	24.54	5.85
190406 Ctrl DMSO Inhibitor C1 DAPI C2 BF C3 Factin C4 Gata3 C5 Pard6.lif - ctrl/rescan control/115 rescan:0158-0554-0714:c:3/5 z:32/67 - ctrl/rescan control/115 rescan	12.31	24.74																														2020JUL12 U73122 7.5uM trial3 F-actin PARD6B GATA3 DAPI BF.lif - U73122 7.5uM/227:0121-0379-0606:c:1/5 z:26/70 - U73122 7.5uM/227	19.61	7.53
apical		38.92		2.06801																												2020JUL12 U73122 7.5uM trial3 F-actin PARD6B GATA3 DAPI BF.lif - U73122 7.5uM/227:0121-0566-0458:c:1/5 z:26/70 - U73122 7.5uM/227	24.02	38.55	1.21805	1.31564
cytoplasm		19.85																														2020JUL12 U73122 7.5uM trial3 F-actin PARD6B GATA3 DAPI BF.lif - U73122 7.5uM/227:0121-0531-0485:c:1/5 z:26/70 - U73122 7.5uM/227	17.25	5.56
basal		18.82																														2020JUL12 U73122 7.5uM trial3 F-actin PARD6B GATA3 DAPI BF.lif - U73122 7.5uM/227:0121-0459-0520:c:1/5 z:26/70 - U73122 7.5uM/227	19.72	13.2
apical		27.77		1.30498																												2020JUL12 U73122 7.5uM trial3 F-actin PARD6B GATA3 DAPI BF.lif - U73122 7.5uM/227:0121-0744-0661:c:1/5 z:26/70 - U73122 7.5uM/227	49.79	31.05	1.79488	1.09886
cytoplasm		19.38																														2020JUL12 U73122 7.5uM trial3 F-actin PARD6B GATA3 DAPI BF.lif - U73122 7.5uM/227:0121-0701-0722:c:1/5 z:26/70 - U73122 7.5uM/227	28.92	5.39
basal		21.28																														2020JUL12 U73122 7.5uM trial3 F-actin PARD6B GATA3 DAPI BF.lif - U73122 7.5uM/227:0121-0668-0725:c:1/5 z:26/70 - U73122 7.5uM/227	27.74	10.02
Embryo 113																																2020JUL12 U73122 7.5uM trial3 F-actin PARD6B GATA3 DAPI BF.lif - U73122 7.5uM/227:0091-0636-0731:c:1/5 z:19/70 - U73122 7.5uM/227	72.45	28.93	2.22103	1.38272
190406 Ctrl DMSO Inhibitor C1 DAPI C2 BF C3 Factin C4 Gata3 C5 Pard6.lif - ctrl/rescan control/113 rescan:0148-0157-0552:c:3/5 z:31/67 - ctrl/rescan control/113 rescan	25.97	60.53	1.40835	1.24215	1.30866	1.49799																										2020JUL12 U73122 7.5uM trial3 F-actin PARD6B GATA3 DAPI BF.lif - U73122 7.5uM/227:0091-0642-0732:c:1/5 z:19/70 - U73122 7.5uM/227	33.87	13.41
190406 Ctrl DMSO Inhibitor C1 DAPI C2 BF C3 Factin C4 Gata3 C5 Pard6.lif - ctrl/rescan control/113 rescan:0148-0171-0591:c:3/5 z:31/67 - ctrl/rescan control/113 rescan	14.76	39.34																														2020JUL12 U73122 7.5uM trial3 F-actin PARD6B GATA3 DAPI BF.lif - U73122 7.5uM/227:0091-0560-0715:c:1/5 z:19/70 - U73122 7.5uM/227	32.62	14.83
190406 Ctrl DMSO Inhibitor C1 DAPI C2 BF C3 Factin C4 Gata3 C5 Pard6.lif - ctrl/rescan control/113 rescan:0148-0197-0458:c:3/5 z:31/67 - ctrl/rescan control/113 rescan	18.44	48.73																														2020JUL12 U73122 7.5uM trial3 F-actin PARD6B GATA3 DAPI BF.lif - U73122 7.5uM/227:0151-0732-0690:c:1/5 z:31/70 - U73122 7.5uM/227	48.38	35.84	1.46739	1.04852
190406 Ctrl DMSO Inhibitor C1 DAPI C2 BF C3 Factin C4 Gata3 C5 Pard6.lif - ctrl/rescan control/113 rescan:0183-0263-0718:c:3/5 z:37/67 - ctrl/rescan control/113 rescan	21.03	64.02	0.946445	1.23734																												2020JUL12 U73122 7.5uM trial3 F-actin PARD6B GATA3 DAPI BF.lif - U73122 7.5uM/227:0151-0709-0722:c:1/5 z:31/70 - U73122 7.5uM/227	39.83	6.7
190406 Ctrl DMSO Inhibitor C1 DAPI C2 BF C3 Factin C4 Gata3 C5 Pard6.lif - ctrl/rescan control/113 rescan:0183-0302-0751:c:3/5 z:37/67 - ctrl/rescan control/113 rescan	12.29	38.22																														2020JUL12 U73122 7.5uM trial3 F-actin PARD6B GATA3 DAPI BF.lif - U73122 7.5uM/227:0151-0641-0746:c:1/5 z:31/70 - U73122 7.5uM/227	32.97	9.83
190406 Ctrl DMSO Inhibitor C1 DAPI C2 BF C3 Factin C4 Gata3 C5 Pard6.lif - ctrl/rescan control/113 rescan:0183-0338-0612:c:3/5 z:37/67 - ctrl/rescan control/113 rescan	22.22	51.74																														Embryo 226
190406 Ctrl DMSO Inhibitor C1 DAPI C2 BF C3 Factin C4 Gata3 C5 Pard6.lif - ctrl/rescan control/113 rescan:0183-0483-0775:c:3/5 z:37/67 - ctrl/rescan control/113 rescan	31.78	53.23	1.66475	1.44255																												2020JUL12 U73122 7.5uM trial3 F-actin PARD6B GATA3 DAPI BF.lif - U73122 7.5uM/226:0106-0388-0602:c:1/5 z:22/57 - U73122 7.5uM/226	40.56	68.26	2.74983	1.16077	2.81013	1.33415
190406 Ctrl DMSO Inhibitor C1 DAPI C2 BF C3 Factin C4 Gata3 C5 Pard6.lif - ctrl/rescan control/113 rescan:0183-0447-0730:c:3/5 z:37/67 - ctrl/rescan control/113 rescan	9.6	29.29																														2020JUL12 U73122 7.5uM trial3 F-actin PARD6B GATA3 DAPI BF.lif - U73122 7.5uM/226:0106-0443-0519:c:1/5 z:22/57 - U73122 7.5uM/226	73.5	1.95
190406 Ctrl DMSO Inhibitor C1 DAPI C2 BF C3 Factin C4 Gata3 C5 Pard6.lif - ctrl/rescan control/113 rescan:0183-0457-0621:c:3/5 z:37/67 - ctrl/rescan control/113 rescan	19.09	36.9																														2020JUL12 U73122 7.5uM trial3 F-actin PARD6B GATA3 DAPI BF.lif - U73122 7.5uM/226:0106-0544-0619:c:1/5 z:22/57 - U73122 7.5uM/226	14.75	14.1
190406 Ctrl DMSO Inhibitor C1 DAPI C2 BF C3 Factin C4 Gata3 C5 Pard6.lif - ctrl/rescan control/113 rescan:0183-0708-0676:c:3/5 z:37/67 - ctrl/rescan control/113 rescan	20.31	45.56	1.16256	1.31335																												2020JUL12 U73122 7.5uM trial3 F-actin PARD6B GATA3 DAPI BF.lif - U73122 7.5uM/226:0106-0689-0722:c:1/5 z:22/57 - U73122 7.5uM/226	52.5	65.94	2.87042	1.50753
190406 Ctrl DMSO Inhibitor C1 DAPI C2 BF C3 Factin C4 Gata3 C5 Pard6.lif - ctrl/rescan control/113 rescan:0183-0681-0716:c:3/5 z:37/67 - ctrl/rescan control/113 rescan	15.06	23.18																														2020JUL12 U73122 7.5uM trial3 F-actin PARD6B GATA3 DAPI BF.lif - U73122 7.5uM/226:0106-0703-0688:c:1/5 z:22/57 - U73122 7.5uM/226	34.17	21.56
190406 Ctrl DMSO Inhibitor C1 DAPI C2 BF C3 Factin C4 Gata3 C5 Pard6.lif - ctrl/rescan control/113 rescan:0183-0583-0679:c:3/5 z:37/67 - ctrl/rescan control/113 rescan	17.47	34.69																														2020JUL12 U73122 7.5uM trial3 F-actin PARD6B GATA3 DAPI BF.lif - U73122 7.5uM/226:0106-0657-0539:c:1/5 z:22/57 - U73122 7.5uM/226	18.29	21.17
190406 Ctrl DMSO Inhibitor C1 DAPI C2 BF C3 Factin C4 Gata3 C5 Pard6.lif - ctrl/rescan control/113 rescan:0208-0325-0294:c:3/5 z:43/67 - ctrl/rescan control/113 rescan	35.84	54.42	1.36118	1.14738																												Embryo 225
190406 Ctrl DMSO Inhibitor C1 DAPI C2 BF C3 Factin C4 Gata3 C5 Pard6.lif - ctrl/rescan control/113 rescan:0208-0328-0275:c:3/5 z:43/67 - ctrl/rescan control/113 rescan	15.48	31																														2020JUL12 U73122 7.5uM trial3 F-actin PARD6B GATA3 DAPI BF.lif - U73122 7.5uM/225-2:0030-0248-0392:c:1/5 z:30/79 - U73122 7.5uM/225	37.92	43.69	1.831	1.33798	1.74227	1.07348
190406 Ctrl DMSO Inhibitor C1 DAPI C2 BF C3 Factin C4 Gata3 C5 Pard6.lif - ctrl/rescan control/113 rescan:0208-0288-0408:c:3/5 z:43/67 - ctrl/rescan control/113 rescan	26.33	47.43																														2020JUL12 U73122 7.5uM trial3 F-actin PARD6B GATA3 DAPI BF.lif - U73122 7.5uM/225-2:0030-0292-0493:c:1/5 z:30/79 - U73122 7.5uM/225	14.24	5.93
apical		45.03		1.64885																												2020JUL12 U73122 7.5uM trial3 F-actin PARD6B GATA3 DAPI BF.lif - U73122 7.5uM/225-2:0030-0412-0364:c:1/5 z:30/79 - U73122 7.5uM/225	20.71	13.95
cytoplasm		29.05																														2020JUL12 U73122 7.5uM trial3 F-actin PARD6B GATA3 DAPI BF.lif - U73122 7.5uM/225-2:0030-0500-0730:c:1/5 z:30/79 - U73122 7.5uM/225	40.91	47.82	1.06954	1.45999
basal		27.31																														2020JUL12 U73122 7.5uM trial3 F-actin PARD6B GATA3 DAPI BF.lif - U73122 7.5uM/225-2:0030-0522-0681:c:1/5 z:30/79 - U73122 7.5uM/225	14.86	15.01
apical		58.2		2.36105																												2020JUL12 U73122 7.5uM trial3 F-actin PARD6B GATA3 DAPI BF.lif - U73122 7.5uM/225-2:0030-0471-0618:c:1/5 z:30/79 - U73122 7.5uM/225	38.25	14.58
cytoplasm		37.4																														2020JUL12 U73122 7.5uM trial3 F-actin PARD6B GATA3 DAPI BF.lif - U73122 7.5uM/225-2:0030-0522-0405:c:1/5 z:30/79 - U73122 7.5uM/225	21.59	56.76	1.41296	0.758774
basal		24.65																														2020JUL12 U73122 7.5uM trial3 F-actin PARD6B GATA3 DAPI BF.lif - U73122 7.5uM/225-2:0030-0572-0444:c:1/5 z:30/79 - U73122 7.5uM/225	16.61	15.29
apical		26.7		1.63403																												2020JUL12 U73122 7.5uM trial3 F-actin PARD6B GATA3 DAPI BF.lif - U73122 7.5uM/225-2:0030-0497-0490:c:1/5 z:30/79 - U73122 7.5uM/225	15.28	12.55
cytoplasm		13.78																														2020JUL12 U73122 7.5uM trial3 F-actin PARD6B GATA3 DAPI BF.lif - U73122 7.5uM/225-2:0045-0434-0325:c:1/5 z:45/79 - U73122 7.5uM/225	17.61	45.81	1.53934	1.05357
basal		16.34																														2020JUL12 U73122 7.5uM trial3 F-actin PARD6B GATA3 DAPI BF.lif - U73122 7.5uM/225-2:0045-0432-0361:c:1/5 z:45/79 - U73122 7.5uM/225	7.34	14.57
apical		35.45		1.45525																												2020JUL12 U73122 7.5uM trial3 F-actin PARD6B GATA3 DAPI BF.lif - U73122 7.5uM/225-2:0045-0348-0460:c:1/5 z:45/79 - U73122 7.5uM/225	11.44	27.3
cytoplasm		17.39																														2020JUL12 U73122 7.5uM trial3 F-actin PARD6B GATA3 DAPI BF.lif - U73122 7.5uM/225-2:0055-0247-0518:c:1/5 z:55/79 - U73122 7.5uM/225	11.72	60.49	2.85854	0.757098
basal		24.36																														2020JUL12 U73122 7.5uM trial3 F-actin PARD6B GATA3 DAPI BF.lif - U73122 7.5uM/225-2:0055-0332-0569:c:1/5 z:55/79 - U73122 7.5uM/225	11.5	12.25
Embryo 117																																2020JUL12 U73122 7.5uM trial3 F-actin PARD6B GATA3 DAPI BF.lif - U73122 7.5uM/225-2:0055-0328-0475:c:1/5 z:55/79 - U73122 7.5uM/225	4.1	27.79
190406 Ctrl DMSO Inhibitor C1 DAPI C2 BF C3 Factin C4 Gata3 C5 Pard6.lif - ctrl/117:0233-0255-0458:c:3/5 z:47/66 - ctrl/117	10.71	63.18	1.10412	2.68166	2.56116	2.36748																										Embryo 224
190406 Ctrl DMSO Inhibitor C1 DAPI C2 BF C3 Factin C4 Gata3 C5 Pard6.lif - ctrl/117:0233-0244-0410:c:3/5 z:47/66 - ctrl/117	9.44	29.95																														2020JUL12 U73122 7.5uM trial3 F-actin PARD6B GATA3 DAPI BF.lif - U73122 7.5uM/224-1:0020-0659-0655:c:1/5 z:20/60 - U73122 7.5uM/224	32.43	78.78	5.13133	2.19484	2.92362	1.67346
190406 Ctrl DMSO Inhibitor C1 DAPI C2 BF C3 Factin C4 Gata3 C5 Pard6.lif - ctrl/117:0233-0314-0412:c:3/5 z:47/66 - ctrl/117	9.7	23.56																														2020JUL12 U73122 7.5uM trial3 F-actin PARD6B GATA3 DAPI BF.lif - U73122 7.5uM/224-1:0020-0732-0619:c:1/5 z:20/60 - U73122 7.5uM/224	8.36	14.93
190406 Ctrl DMSO Inhibitor C1 DAPI C2 BF C3 Factin C4 Gata3 C5 Pard6.lif - ctrl/117:0233-0323-0678:c:3/5 z:47/66 - ctrl/117	16.86	52.46	2.00714	1.73021																												2020JUL12 U73122 7.5uM trial3 F-actin PARD6B GATA3 DAPI BF.lif - U73122 7.5uM/224-1:0020-0675-0576:c:1/5 z:20/60 - U73122 7.5uM/224	6.32	24.02
190406 Ctrl DMSO Inhibitor C1 DAPI C2 BF C3 Factin C4 Gata3 C5 Pard6.lif - ctrl/117:0233-0339-0687:c:3/5 z:47/66 - ctrl/117	5.97	24.74																														2020JUL12 U73122 7.5uM trial3 F-actin PARD6B GATA3 DAPI BF.lif - U73122 7.5uM/224-1:0030-0859-0509:c:1/5 z:30/60 - U73122 7.5uM/224	13.86	57.69	0.715909	1.15208
190406 Ctrl DMSO Inhibitor C1 DAPI C2 BF C3 Factin C4 Gata3 C5 Pard6.lif - ctrl/117:0233-0401-0658:c:3/5 z:47/66 - ctrl/117	8.4	30.32																														2020JUL12 U73122 7.5uM trial3 F-actin PARD6B GATA3 DAPI BF.lif - U73122 7.5uM/224-1:0030-0835-0571:c:1/5 z:30/60 - U73122 7.5uM/224	17.3	22.38
190406 Ctrl DMSO Inhibitor C1 DAPI C2 BF C3 Factin C4 Gata3 C5 Pard6.lif - ctrl/117:0233-0507-0763:c:3/5 z:47/66 - ctrl/117	9.96	69.23	2.11017	3.09339																												2020JUL12 U73122 7.5uM trial3 F-actin PARD6B GATA3 DAPI BF.lif - U73122 7.5uM/224-1:0030-0660-0366:c:1/5 z:30/60 - U73122 7.5uM/224	19.36	29.29
190406 Ctrl DMSO Inhibitor C1 DAPI C2 BF C3 Factin C4 Gata3 C5 Pard6.lif - ctrl/117:0233-0531-0759:c:3/5 z:47/66 - ctrl/117	7.69	27.23																														Embryo 223
190406 Ctrl DMSO Inhibitor C1 DAPI C2 BF C3 Factin C4 Gata3 C5 Pard6.lif - ctrl/117:0233-0422-0684:c:3/5 z:47/66 - ctrl/117	4.72	22.38																														2020JUL12 U73122 7.5uM trial3 F-actin PARD6B GATA3 DAPI BF.lif - U73122 7.5uM/223:0096-0299-0529:c:1/5 z:20/69 - U73122 7.5uM/223	49.15	63.19	1.07738	0.956462	0.812792	0.898433
190406 Ctrl DMSO Inhibitor C1 DAPI C2 BF C3 Factin C4 Gata3 C5 Pard6.lif - ctrl/117:0233-0720-0560:c:3/5 z:47/66 - ctrl/117	19.56	62.1	2.55352	2.75266																												2020JUL12 U73122 7.5uM trial3 F-actin PARD6B GATA3 DAPI BF.lif - U73122 7.5uM/223:0096-0362-0582:c:1/5 z:20/69 - U73122 7.5uM/223	33.39	24.14
190406 Ctrl DMSO Inhibitor C1 DAPI C2 BF C3 Factin C4 Gata3 C5 Pard6.lif - ctrl/117:0233-0673-0595:c:3/5 z:47/66 - ctrl/117	4.22	26.23																														2020JUL12 U73122 7.5uM trial3 F-actin PARD6B GATA3 DAPI BF.lif - U73122 7.5uM/223:0096-0466-0583:c:1/5 z:20/69 - U73122 7.5uM/223	45.62	32.24
190406 Ctrl DMSO Inhibitor C1 DAPI C2 BF C3 Factin C4 Gata3 C5 Pard6.lif - ctrl/117:0233-0678-0464:c:3/5 z:47/66 - ctrl/117	7.66	22.56																														2020JUL12 U73122 7.5uM trial3 F-actin PARD6B GATA3 DAPI BF.lif - U73122 7.5uM/223:0096-0660-0398:c:1/5 z:20/69 - U73122 7.5uM/223	28.9	61.54	1.42999	1.10623
190406 Ctrl DMSO Inhibitor C1 DAPI C2 BF C3 Factin C4 Gata3 C5 Pard6.lif - ctrl/117:0233-0708-0346:c:3/5 z:47/66 - ctrl/117	16.85	50.37	2.70032	1.57949																												2020JUL12 U73122 7.5uM trial3 F-actin PARD6B GATA3 DAPI BF.lif - U73122 7.5uM/223:0096-0682-0435:c:1/5 z:20/69 - U73122 7.5uM/223	34.43	17.77
190406 Ctrl DMSO Inhibitor C1 DAPI C2 BF C3 Factin C4 Gata3 C5 Pard6.lif - ctrl/117:0233-0640-0308:c:3/5 z:47/66 - ctrl/117	7.79	22.18																														2020JUL12 U73122 7.5uM trial3 F-actin PARD6B GATA3 DAPI BF.lif - U73122 7.5uM/223:0096-0591-0532:c:1/5 z:20/69 - U73122 7.5uM/223	20.21	20.28
190406 Ctrl DMSO Inhibitor C1 DAPI C2 BF C3 Factin C4 Gata3 C5 Pard6.lif - ctrl/117:0233-0579-0368:c:3/5 z:47/66 - ctrl/117	6.24	31.89																														2020JUL12 U73122 7.5uM trial3 F-actin PARD6B GATA3 DAPI BF.lif - U73122 7.5uM/223:0116-0439-0227:c:1/5 z:24/69 - U73122 7.5uM/223	30.03	66.23	0.694978	0.816754
190406 Ctrl DMSO Inhibitor C1 DAPI C2 BF C3 Factin C4 Gata3 C5 Pard6.lif - ctrl/117:0198-0458-0269:c:3/5 z:40/66 - ctrl/117	41.61		5.46063																													2020JUL12 U73122 7.5uM trial3 F-actin PARD6B GATA3 DAPI BF.lif - U73122 7.5uM/223:0116-0425-0200:c:1/5 z:24/69 - U73122 7.5uM/223	25.78	19.69
190406 Ctrl DMSO Inhibitor C1 DAPI C2 BF C3 Factin C4 Gata3 C5 Pard6.lif - ctrl/117:0198-0444-0313:c:3/5 z:40/66 - ctrl/117	10.52																															2020JUL12 U73122 7.5uM trial3 F-actin PARD6B GATA3 DAPI BF.lif - U73122 7.5uM/223:0116-0393-0323:c:1/5 z:24/69 - U73122 7.5uM/223	43.21	18.08
190406 Ctrl DMSO Inhibitor C1 DAPI C2 BF C3 Factin C4 Gata3 C5 Pard6.lif - ctrl/117:0198-0307-0422:c:3/5 z:40/66 - ctrl/117	7.62																															2020JUL12 U73122 7.5uM trial3 F-actin PARD6B GATA3 DAPI BF.lif - U73122 7.5uM/223:0146-0571-0633:c:1/5 z:30/69 - U73122 7.5uM/223	20.49	76.81	0.539352	0.638945
190406 Ctrl DMSO Inhibitor C1 DAPI C2 BF C3 Factin C4 Gata3 C5 Pard6.lif - ctrl/117:0133-0613-0506:c:3/5 z:27/66 - ctrl/117	38.35		1.99221																													2020JUL12 U73122 7.5uM trial3 F-actin PARD6B GATA3 DAPI BF.lif - U73122 7.5uM/223:0146-0612-0665:c:1/5 z:30/69 - U73122 7.5uM/223	25.01	17.58
190406 Ctrl DMSO Inhibitor C1 DAPI C2 BF C3 Factin C4 Gata3 C5 Pard6.lif - ctrl/117:0133-0596-0547:c:3/5 z:27/66 - ctrl/117	7.26																															2020JUL12 U73122 7.5uM trial3 F-actin PARD6B GATA3 DAPI BF.lif - U73122 7.5uM/223:0146-0435-0518:c:1/5 z:30/69 - U73122 7.5uM/223	37.99	28.05
190406 Ctrl DMSO Inhibitor C1 DAPI C2 BF C3 Factin C4 Gata3 C5 Pard6.lif - ctrl/117:0133-0517-0600:c:3/5 z:27/66 - ctrl/117	19.25																															2020JUL12 U73122 7.5uM trial3 F-actin PARD6B GATA3 DAPI BF.lif - U73122 7.5uM/223:0156-0181-0422:c:1/5 z:32/69 - U73122 7.5uM/223	14.58	60.86	0.543827	0.991142
Embryo 116																																2020JUL12 U73122 7.5uM trial3 F-actin PARD6B GATA3 DAPI BF.lif - U73122 7.5uM/223:0156-0255-0377:c:1/5 z:32/69 - U73122 7.5uM/223	19.07	10.75
190406 Ctrl DMSO Inhibitor C1 DAPI C2 BF C3 Factin C4 Gata3 C5 Pard6.lif - ctrl/116:0203-0450-0673:c:3/5 z:41/66 - ctrl/116	11.62	12.91	1.02379	0.477794	1.75839	1.69768																										2020JUL12 U73122 7.5uM trial3 F-actin PARD6B GATA3 DAPI BF.lif - U73122 7.5uM/223:0156-0295-0309:c:1/5 z:32/69 - U73122 7.5uM/223	26.81	13.54
190406 Ctrl DMSO Inhibitor C1 DAPI C2 BF C3 Factin C4 Gata3 C5 Pard6.lif - ctrl/116:0203-0389-0697:c:3/5 z:41/66 - ctrl/116	11.04	39.43																														2020JUL12 U73122 7.5uM trial3 F-actin PARD6B GATA3 DAPI BF.lif - U73122 7.5uM/223:0156-0582-0297:c:1/5 z:32/69 - U73122 7.5uM/223	13.97	57.83	0.498929	0.810099
190406 Ctrl DMSO Inhibitor C1 DAPI C2 BF C3 Factin C4 Gata3 C5 Pard6.lif - ctrl/116:0203-0546-0595:c:3/5 z:41/66 - ctrl/116	11.35	27.02																														2020JUL12 U73122 7.5uM trial3 F-actin PARD6B GATA3 DAPI BF.lif - U73122 7.5uM/223:0156-0634-0325:c:1/5 z:32/69 - U73122 7.5uM/223	9.52	14.57
190406 Ctrl DMSO Inhibitor C1 DAPI C2 BF C3 Factin C4 Gata3 C5 Pard6.lif - ctrl/116:0203-0707-0571:c:3/5 z:41/66 - ctrl/116	17.64	71.36	2.40327	2.77342																												2020JUL12 U73122 7.5uM trial3 F-actin PARD6B GATA3 DAPI BF.lif - U73122 7.5uM/223:0156-0462-0385:c:1/5 z:32/69 - U73122 7.5uM/223	28	15.82
190406 Ctrl DMSO Inhibitor C1 DAPI C2 BF C3 Factin C4 Gata3 C5 Pard6.lif - ctrl/116:0203-0720-0599:c:3/5 z:41/66 - ctrl/116	10.96	24.51																														2020JUL12 U73122 7.5uM trial3 F-actin PARD6B GATA3 DAPI BF.lif - U73122 7.5uM/223:0196-0361-0178:c:1/5 z:43/69 - U73122 7.5uM/223	9.06	37.01	0.905095	0.969398
190406 Ctrl DMSO Inhibitor C1 DAPI C2 BF C3 Factin C4 Gata3 C5 Pard6.lif - ctrl/116:0203-0675-0468:c:3/5 z:41/66 - ctrl/116	7.34	25.73																														2020JUL12 U73122 7.5uM trial3 F-actin PARD6B GATA3 DAPI BF.lif - U73122 7.5uM/223:0196-0404-0228:c:1/5 z:43/69 - U73122 7.5uM/223	15.1	13.41
190406 Ctrl DMSO Inhibitor C1 DAPI C2 BF C3 Factin C4 Gata3 C5 Pard6.lif - ctrl/116:0203-0642-0332:c:3/5 z:41/66 - ctrl/116	16.57	59.1	0.87533	3.01839																												2020JUL12 U73122 7.5uM trial3 F-actin PARD6B GATA3 DAPI BF.lif - U73122 7.5uM/223:0196-0280-0303:c:1/5 z:43/69 - U73122 7.5uM/223	10.01	9.86
190406 Ctrl DMSO Inhibitor C1 DAPI C2 BF C3 Factin C4 Gata3 C5 Pard6.lif - ctrl/116:0203-0683-0319:c:3/5 z:41/66 - ctrl/116	13.47	24																														Embryo 222
190406 Ctrl DMSO Inhibitor C1 DAPI C2 BF C3 Factin C4 Gata3 C5 Pard6.lif - ctrl/116:0203-0516-0428:c:3/5 z:41/66 - ctrl/116	18.93	19.58																														2020JUL12 U73122 7.5uM trial3 F-actin PARD6B GATA3 DAPI BF.lif - U73122 7.5uM/222:0096-0396-0642:c:1/5 z:20/83 - U73122 7.5uM/222	42.19	59.29	3.43008	3.04965	2.07097	1.91383
190406 Ctrl DMSO Inhibitor C1 DAPI C2 BF C3 Factin C4 Gata3 C5 Pard6.lif - ctrl/116:0153-0505-0486:c:3/5 z:31/66 - ctrl/116	21.03	26.39	2.73117	1.1677																												2020JUL12 U73122 7.5uM trial3 F-actin PARD6B GATA3 DAPI BF.lif - U73122 7.5uM/222:0096-0456-0601:c:1/5 z:20/83 - U73122 7.5uM/222	7.4	21.69
190406 Ctrl DMSO Inhibitor C1 DAPI C2 BF C3 Factin C4 Gata3 C5 Pard6.lif - ctrl/116:0153-0551-0513:c:3/5 z:31/66 - ctrl/116	11.49	27.6																														2020JUL12 U73122 7.5uM trial3 F-actin PARD6B GATA3 DAPI BF.lif - U73122 7.5uM/222:0096-0547-0566:c:1/5 z:20/83 - U73122 7.5uM/222	12.3	15.66
190406 Ctrl DMSO Inhibitor C1 DAPI C2 BF C3 Factin C4 Gata3 C5 Pard6.lif - ctrl/116:0153-0563-0435:c:3/5 z:31/66 - ctrl/116	7.7	22.6																														2020JUL12 U73122 7.5uM trial3 F-actin PARD6B GATA3 DAPI BF.lif - U73122 7.5uM/222:0101-0737-0667:c:1/5 z:21/83 - U73122 7.5uM/222	35.6	35.43	1.62631	1.74634
apical		35.37		1.05111																												2020JUL12 U73122 7.5uM trial3 F-actin PARD6B GATA3 DAPI BF.lif - U73122 7.5uM/222:0101-0728-0715:c:1/5 z:21/83 - U73122 7.5uM/222	23.76	7.72
cytoplasm		31.15																														2020JUL12 U73122 7.5uM trial3 F-actin PARD6B GATA3 DAPI BF.lif - U73122 7.5uM/222:0101-0656-0721:c:1/5 z:21/83 - U73122 7.5uM/222	21.89	7.75
basal		33.65																														2020JUL12 U73122 7.5uM trial3 F-actin PARD6B GATA3 DAPI BF.lif - U73122 7.5uM/222:0101-0593-0803:c:1/5 z:21/83 - U73122 7.5uM/222	38.13	29.61	1.12544	1.39293
Embryo 112																																2020JUL12 U73122 7.5uM trial3 F-actin PARD6B GATA3 DAPI BF.lif - U73122 7.5uM/222:0101-0634-0781:c:1/5 z:21/83 - U73122 7.5uM/222	37.52	7.49
190406 Ctrl DMSO Inhibitor C1 DAPI C2 BF C3 Factin C4 Gata3 C5 Pard6.lif - ctrl/112:0243-0099-0613:c:3/5 z:48/66 - ctrl/112	14.76	60.94	1.94211	1.47447	2.86733	1.78495																										2020JUL12 U73122 7.5uM trial3 F-actin PARD6B GATA3 DAPI BF.lif - U73122 7.5uM/222:0101-0661-0726:c:1/5 z:21/83 - U73122 7.5uM/222	33.88	10.27
190406 Ctrl DMSO Inhibitor C1 DAPI C2 BF C3 Factin C4 Gata3 C5 Pard6.lif - ctrl/112:0243-0090-0667:c:3/5 z:48/66 - ctrl/112	13.33	31																														2020JUL12 U73122 7.5uM trial3 F-actin PARD6B GATA3 DAPI BF.lif - U73122 7.5uM/222:0131-0698-0426:c:1/5 z:27/83 - U73122 7.5uM/222	31.08	88.84	1.61875	1.69584
190406 Ctrl DMSO Inhibitor C1 DAPI C2 BF C3 Factin C4 Gata3 C5 Pard6.lif - ctrl/112:0243-0156-0601:c:3/5 z:48/66 - ctrl/112	7.6	41.33																														2020JUL12 U73122 7.5uM trial3 F-actin PARD6B GATA3 DAPI BF.lif - U73122 7.5uM/222:0131-0775-0485:c:1/5 z:27/83 - U73122 7.5uM/222	26.92	18.7
190406 Ctrl DMSO Inhibitor C1 DAPI C2 BF C3 Factin C4 Gata3 C5 Pard6.lif - ctrl/112:0238-0282-0758:c:3/5 z:48/66 - ctrl/112	19.06	44.86	2.37065	1.53001																												2020JUL12 U73122 7.5uM trial3 F-actin PARD6B GATA3 DAPI BF.lif - U73122 7.5uM/222:0131-0634-0524:c:1/5 z:27/83 - U73122 7.5uM/222	19.2	30.72
190406 Ctrl DMSO Inhibitor C1 DAPI C2 BF C3 Factin C4 Gata3 C5 Pard6.lif - ctrl/112:0238-0301-0743:c:3/5 z:48/66 - ctrl/112	5.55	26.63																														2020JUL12 U73122 7.5uM trial3 F-actin PARD6B GATA3 DAPI BF.lif - U73122 7.5uM/222:0171-0461-0458:c:1/5 z:35/83 - U73122 7.5uM/222	22.35	35.61	2.55429	1.6844
190406 Ctrl DMSO Inhibitor C1 DAPI C2 BF C3 Factin C4 Gata3 C5 Pard6.lif - ctrl/112:0238-0338-0713:c:3/5 z:48/66 - ctrl/112	8.04	29.32																														2020JUL12 U73122 7.5uM trial3 F-actin PARD6B GATA3 DAPI BF.lif - U73122 7.5uM/222:0171-0518-0458:c:1/5 z:35/83 - U73122 7.5uM/222	14.49	10.93
190406 Ctrl DMSO Inhibitor C1 DAPI C2 BF C3 Factin C4 Gata3 C5 Pard6.lif - ctrl/112:0248-0467-0670:c:3/5 z:50/66 - ctrl/112	36.99	40.19	4.44591	1.51775																												2020JUL12 U73122 7.5uM trial3 F-actin PARD6B GATA3 DAPI BF.lif - U73122 7.5uM/222:0171-0596-0459:c:1/5 z:35/83 - U73122 7.5uM/222	8.75	17.81
190406 Ctrl DMSO Inhibitor C1 DAPI C2 BF C3 Factin C4 Gata3 C5 Pard6.lif - ctrl/112:0248-0417-0657:c:3/5 z:50/66 - ctrl/112	4.63	24.6
190406 Ctrl DMSO Inhibitor C1 DAPI C2 BF C3 Factin C4 Gata3 C5 Pard6.lif - ctrl/112:0248-0462-0609:c:3/5 z:50/66 - ctrl/112	8.32	26.48
190406 Ctrl DMSO Inhibitor C1 DAPI C2 BF C3 Factin C4 Gata3 C5 Pard6.lif - ctrl/112:0248-0256-0309:c:3/5 z:50/66 - ctrl/112	19.21	51.91	3.72287	2.05666
190406 Ctrl DMSO Inhibitor C1 DAPI C2 BF C3 Factin C4 Gata3 C5 Pard6.lif - ctrl/112:0248-0210-0347:c:3/5 z:50/66 - ctrl/112	2.45	26.36
190406 Ctrl DMSO Inhibitor C1 DAPI C2 BF C3 Factin C4 Gata3 C5 Pard6.lif - ctrl/112:0248-0186-0408:c:3/5 z:50/66 - ctrl/112	5.16	25.24
190406 Ctrl DMSO Inhibitor C1 DAPI C2 BF C3 Factin C4 Gata3 C5 Pard6.lif - ctrl/112:0208-0111-0455:c:3/5 z:42/66 - ctrl/112	34.06	66.97	1.85512	2.15546
190406 Ctrl DMSO Inhibitor C1 DAPI C2 BF C3 Factin C4 Gata3 C5 Pard6.lif - ctrl/112:0208-0145-0447:c:3/5 z:42/66 - ctrl/112	6.69	31.36
190406 Ctrl DMSO Inhibitor C1 DAPI C2 BF C3 Factin C4 Gata3 C5 Pard6.lif - ctrl/112:0208-0161-0417:c:3/5 z:42/66 - ctrl/112	18.36	31.07
apical		75.42		1.97538
cytoplasm		34.72
basal		38.18
Embryo 111
190406 Ctrl DMSO Inhibitor C1 DAPI C2 BF C3 Factin C4 Gata3 C5 Pard6.lif - ctrl/111:0208-0275-0715:c:3/5 z:42/66 - ctrl/111	21.1	46.17	2.75457	0.952155	3.88029	1.71433
190406 Ctrl DMSO Inhibitor C1 DAPI C2 BF C3 Factin C4 Gata3 C5 Pard6.lif - ctrl/111:0208-0207-0673:c:3/5 z:42/66 - ctrl/111	2.56	30.42
190406 Ctrl DMSO Inhibitor C1 DAPI C2 BF C3 Factin C4 Gata3 C5 Pard6.lif - ctrl/111:0208-0222-0624:c:3/5 z:42/66 - ctrl/111	7.66	48.49
190406 Ctrl DMSO Inhibitor C1 DAPI C2 BF C3 Factin C4 Gata3 C5 Pard6.lif - ctrl/111:0203-0140-0548:c:3/5 z:41/66 - ctrl/111	39.35	47.39	6.22627	2.28496
190406 Ctrl DMSO Inhibitor C1 DAPI C2 BF C3 Factin C4 Gata3 C5 Pard6.lif - ctrl/111:0203-0191-0558:c:3/5 z:41/66 - ctrl/111	2.19	31.84
190406 Ctrl DMSO Inhibitor C1 DAPI C2 BF C3 Factin C4 Gata3 C5 Pard6.lif - ctrl/111:0203-0212-0622:c:3/5 z:41/66 - ctrl/111	6.32	20.74
190406 Ctrl DMSO Inhibitor C1 DAPI C2 BF C3 Factin C4 Gata3 C5 Pard6.lif - ctrl/111:0203-0310-0203:c:3/5 z:41/66 - ctrl/111	29.47	50.88	3.72096	1.68644
190406 Ctrl DMSO Inhibitor C1 DAPI C2 BF C3 Factin C4 Gata3 C5 Pard6.lif - ctrl/111:0203-0310-0235:c:3/5 z:41/66 - ctrl/111	6.57	34.88
190406 Ctrl DMSO Inhibitor C1 DAPI C2 BF C3 Factin C4 Gata3 C5 Pard6.lif - ctrl/111:0203-0227-0292:c:3/5 z:41/66 - ctrl/111	7.92	30.17
190406 Ctrl DMSO Inhibitor C1 DAPI C2 BF C3 Factin C4 Gata3 C5 Pard6.lif - ctrl/111:0203-0511-0274:c:3/5 z:41/66 - ctrl/111	21.05	51.55	5.18473	1.26627
190406 Ctrl DMSO Inhibitor C1 DAPI C2 BF C3 Factin C4 Gata3 C5 Pard6.lif - ctrl/111:0203-0546-0292:c:3/5 z:41/66 - ctrl/111	2.18	38.41
190406 Ctrl DMSO Inhibitor C1 DAPI C2 BF C3 Factin C4 Gata3 C5 Pard6.lif - ctrl/111:0203-0506-0295:c:3/5 z:41/66 - ctrl/111	4.06	40.71
190406 Ctrl DMSO Inhibitor C1 DAPI C2 BF C3 Factin C4 Gata3 C5 Pard6.lif - ctrl/111:0203-0602-0520:c:3/5 z:41/66 - ctrl/111	13.21	68.62	1.51491	2.38181
190406 Ctrl DMSO Inhibitor C1 DAPI C2 BF C3 Factin C4 Gata3 C5 Pard6.lif - ctrl/111:0203-0590-0607:c:3/5 z:41/66 - ctrl/111	4.56	58.58
190406 Ctrl DMSO Inhibitor C1 DAPI C2 BF C3 Factin C4 Gata3 C5 Pard6.lif - ctrl/111:0203-0543-0536:c:3/5 z:41/66 - ctrl/111	8.72	28.81
Embryo 110
190406 Ctrl DMSO Inhibitor C1 DAPI C2 BF C3 Factin C4 Gata3 C5 Pard6.lif - ctrl/110:0218-0655-0697:c:3/5 z:44/66 - ctrl/110	47.69	66.43	1.72166	1.32015	2.32281	1.52794
190406 Ctrl DMSO Inhibitor C1 DAPI C2 BF C3 Factin C4 Gata3 C5 Pard6.lif - ctrl/110:0218-0610-0649:c:3/5 z:44/66 - ctrl/110	17.96	47.92
190406 Ctrl DMSO Inhibitor C1 DAPI C2 BF C3 Factin C4 Gata3 C5 Pard6.lif - ctrl/110:0218-0586-0625:c:3/5 z:44/66 - ctrl/110	27.7	50.32
190406 Ctrl DMSO Inhibitor C1 DAPI C2 BF C3 Factin C4 Gata3 C5 Pard6.lif - ctrl/110:0228-0459-0687:c:3/5 z:46/66 - ctrl/110	39.66	61.49	1.70875	1.42338
190406 Ctrl DMSO Inhibitor C1 DAPI C2 BF C3 Factin C4 Gata3 C5 Pard6.lif - ctrl/110:0228-0498-0685:c:3/5 z:46/66 - ctrl/110	15.09	38.16
190406 Ctrl DMSO Inhibitor C1 DAPI C2 BF C3 Factin C4 Gata3 C5 Pard6.lif - ctrl/110:0228-0493-0619:c:3/5 z:46/66 - ctrl/110	23.21	43.2
190406 Ctrl DMSO Inhibitor C1 DAPI C2 BF C3 Factin C4 Gata3 C5 Pard6.lif - ctrl/110:0228-0395-0561:c:3/5 z:46/66 - ctrl/110	73.62	54.29	6.02948	1.48171
190406 Ctrl DMSO Inhibitor C1 DAPI C2 BF C3 Factin C4 Gata3 C5 Pard6.lif - ctrl/110:0228-0454-0539:c:3/5 z:46/66 - ctrl/110	12.92	34.93
190406 Ctrl DMSO Inhibitor C1 DAPI C2 BF C3 Factin C4 Gata3 C5 Pard6.lif - ctrl/110:0228-0481-0469:c:3/5 z:46/66 - ctrl/110	12.21	36.64
190406 Ctrl DMSO Inhibitor C1 DAPI C2 BF C3 Factin C4 Gata3 C5 Pard6.lif - ctrl/110:0228-0447-0393:c:3/5 z:46/66 - ctrl/110	32.88	60.45	2.42478	1.60985
190406 Ctrl DMSO Inhibitor C1 DAPI C2 BF C3 Factin C4 Gata3 C5 Pard6.lif - ctrl/110:0228-0471-0400:c:3/5 z:46/66 - ctrl/110	9.69	38.65
190406 Ctrl DMSO Inhibitor C1 DAPI C2 BF C3 Factin C4 Gata3 C5 Pard6.lif - ctrl/110:0228-0486-0472:c:3/5 z:46/66 - ctrl/110	13.56	37.55
190406 Ctrl DMSO Inhibitor C1 DAPI C2 BF C3 Factin C4 Gata3 C5 Pard6.lif - ctrl/110:0228-0742-0194:c:3/5 z:46/66 - ctrl/110	21.85	82.56	1.38204	1.80459
190406 Ctrl DMSO Inhibitor C1 DAPI C2 BF C3 Factin C4 Gata3 C5 Pard6.lif - ctrl/110:0228-0721-0241:c:3/5 z:46/66 - ctrl/110	7.68	34.85
190406 Ctrl DMSO Inhibitor C1 DAPI C2 BF C3 Factin C4 Gata3 C5 Pard6.lif - ctrl/110:0228-0661-0260:c:3/5 z:46/66 - ctrl/110	15.81	45.75
190406 Ctrl DMSO Inhibitor C1 DAPI C2 BF C3 Factin C4 Gata3 C5 Pard6.lif - ctrl/110:0208-0843-0390:c:3/5 z:42/66 - ctrl/110	14.81		0.670136
190406 Ctrl DMSO Inhibitor C1 DAPI C2 BF C3 Factin C4 Gata3 C5 Pard6.lif - ctrl/110:0208-0839-0383:c:3/5 z:42/66 - ctrl/110	10.02
190406 Ctrl DMSO Inhibitor C1 DAPI C2 BF C3 Factin C4 Gata3 C5 Pard6.lif - ctrl/110:0208-0816-0426:c:3/5 z:42/66 - ctrl/110	22.1
Embryo 109
190406 Ctrl DMSO Inhibitor C1 DAPI C2 BF C3 Factin C4 Gata3 C5 Pard6.lif - ctrl/109:0203-0409-0557:c:3/5 z:41/66 - ctrl/109	36.07	24.28	1.63287	1.01293	1.3597	1.39375
190406 Ctrl DMSO Inhibitor C1 DAPI C2 BF C3 Factin C4 Gata3 C5 Pard6.lif - ctrl/109:0203-0398-0510:c:3/5 z:41/66 - ctrl/109	15.58	20.89
190406 Ctrl DMSO Inhibitor C1 DAPI C2 BF C3 Factin C4 Gata3 C5 Pard6.lif - ctrl/109:0203-0455-0444:c:3/5 z:41/66 - ctrl/109	22.09	23.97
190406 Ctrl DMSO Inhibitor C1 DAPI C2 BF C3 Factin C4 Gata3 C5 Pard6.lif - ctrl/109:0203-0586-0673:c:3/5 z:41/66 - ctrl/109	18.69	36.2	1.92482	1.10164
190406 Ctrl DMSO Inhibitor C1 DAPI C2 BF C3 Factin C4 Gata3 C5 Pard6.lif - ctrl/109:0203-0581-0621:c:3/5 z:41/66 - ctrl/109	12.91	39.69
190406 Ctrl DMSO Inhibitor C1 DAPI C2 BF C3 Factin C4 Gata3 C5 Pard6.lif - ctrl/109:0203-0643-0538:c:3/5 z:41/66 - ctrl/109	9.71	32.86
190406 Ctrl DMSO Inhibitor C1 DAPI C2 BF C3 Factin C4 Gata3 C5 Pard6.lif - ctrl/109:0203-0799-0419:c:3/5 z:41/66 - ctrl/109	27.18	44.82	0.759006	1.23437
190406 Ctrl DMSO Inhibitor C1 DAPI C2 BF C3 Factin C4 Gata3 C5 Pard6.lif - ctrl/109:0203-0729-0404:c:3/5 z:41/66 - ctrl/109	20.42	37.73
190406 Ctrl DMSO Inhibitor C1 DAPI C2 BF C3 Factin C4 Gata3 C5 Pard6.lif - ctrl/109:0203-0648-0283:c:3/5 z:41/66 - ctrl/109	35.81	36.31
190406 Ctrl DMSO Inhibitor C1 DAPI C2 BF C3 Factin C4 Gata3 C5 Pard6.lif - ctrl/109:0238-0639-0205:c:3/5 z:48/66 - ctrl/109	21.41	46.97	1.12212	2.22607
190406 Ctrl DMSO Inhibitor C1 DAPI C2 BF C3 Factin C4 Gata3 C5 Pard6.lif - ctrl/109:0238-0625-0215:c:3/5 z:48/66 - ctrl/109	17.2	37.13
190406 Ctrl DMSO Inhibitor C1 DAPI C2 BF C3 Factin C4 Gata3 C5 Pard6.lif - ctrl/109:0238-0636-0289:c:3/5 z:48/66 - ctrl/109	19.08	21.1
Embryo 108
190406 Ctrl DMSO Inhibitor C1 DAPI C2 BF C3 Factin C4 Gata3 C5 Pard6.lif - ctrl/108:0213-0333-0485:c:3/5 z:43/66 - ctrl/108	77.18	28.45	3.07735	0.743402	2.71893	0.976289
190406 Ctrl DMSO Inhibitor C1 DAPI C2 BF C3 Factin C4 Gata3 C5 Pard6.lif - ctrl/108:0213-0355-0504:c:3/5 z:43/66 - ctrl/108	22.61	51.63
190406 Ctrl DMSO Inhibitor C1 DAPI C2 BF C3 Factin C4 Gata3 C5 Pard6.lif - ctrl/108:0213-0378-0594:c:3/5 z:43/66 - ctrl/108	25.08	38.27
190406 Ctrl DMSO Inhibitor C1 DAPI C2 BF C3 Factin C4 Gata3 C5 Pard6.lif - ctrl/108:0213-0404-0359:c:3/5 z:43/66 - ctrl/108	50.33	10.23	1.95989	0.254541
190406 Ctrl DMSO Inhibitor C1 DAPI C2 BF C3 Factin C4 Gata3 C5 Pard6.lif - ctrl/108:0213-0456-0358:c:3/5 z:43/66 - ctrl/108	23.88	46.47
190406 Ctrl DMSO Inhibitor C1 DAPI C2 BF C3 Factin C4 Gata3 C5 Pard6.lif - ctrl/108:0213-0421-0446:c:3/5 z:43/66 - ctrl/108	25.68	40.19
190406 Ctrl DMSO Inhibitor C1 DAPI C2 BF C3 Factin C4 Gata3 C5 Pard6.lif - ctrl/108:0213-0634-0325:c:3/5 z:43/66 - ctrl/108	46.33	38.25	2.30612	1.44449
190406 Ctrl DMSO Inhibitor C1 DAPI C2 BF C3 Factin C4 Gata3 C5 Pard6.lif - ctrl/108:0213-0653-0349:c:3/5 z:43/66 - ctrl/108	21.82	26.29
190406 Ctrl DMSO Inhibitor C1 DAPI C2 BF C3 Factin C4 Gata3 C5 Pard6.lif - ctrl/108:0213-0621-0426:c:3/5 z:43/66 - ctrl/108	20.09	26.48
190406 Ctrl DMSO Inhibitor C1 DAPI C2 BF C3 Factin C4 Gata3 C5 Pard6.lif - ctrl/108:0213-0568-0776:c:3/5 z:43/66 - ctrl/108	79.4	27.86	2.51664	0.738404
190406 Ctrl DMSO Inhibitor C1 DAPI C2 BF C3 Factin C4 Gata3 C5 Pard6.lif - ctrl/108:0213-0600-0739:c:3/5 z:43/66 - ctrl/108	20.43	23.9
190406 Ctrl DMSO Inhibitor C1 DAPI C2 BF C3 Factin C4 Gata3 C5 Pard6.lif - ctrl/108:0213-0573-0675:c:3/5 z:43/66 - ctrl/108	31.55	37.73
190406 Ctrl DMSO Inhibitor C1 DAPI C2 BF C3 Factin C4 Gata3 C5 Pard6.lif - ctrl/108:0213-0736-0716:c:3/5 z:43/66 - ctrl/108	92.75	25.58	4.90222	1.1146
190406 Ctrl DMSO Inhibitor C1 DAPI C2 BF C3 Factin C4 Gata3 C5 Pard6.lif - ctrl/108:0213-0730-0676:c:3/5 z:43/66 - ctrl/108	27.26	24.9
190406 Ctrl DMSO Inhibitor C1 DAPI C2 BF C3 Factin C4 Gata3 C5 Pard6.lif - ctrl/108:0213-0644-0698:c:3/5 z:43/66 - ctrl/108	18.92	22.95
190406 Ctrl DMSO Inhibitor C1 DAPI C2 BF C3 Factin C4 Gata3 C5 Pard6.lif - ctrl/108:0193-0878-0481:c:3/5 z:39/66 - ctrl/108	42.15	39.62	1.55134	1.5623
190406 Ctrl DMSO Inhibitor C1 DAPI C2 BF C3 Factin C4 Gata3 C5 Pard6.lif - ctrl/108:0193-0844-0476:c:3/5 z:39/66 - ctrl/108	31.55	35.78
190406 Ctrl DMSO Inhibitor C1 DAPI C2 BF C3 Factin C4 Gata3 C5 Pard6.lif - ctrl/108:0193-0763-0476:c:3/5 z:39/66 - ctrl/108	27.17	25.36
Embryo 107
190406 Ctrl DMSO Inhibitor C1 DAPI C2 BF C3 Factin C4 Gata3 C5 Pard6.lif - ctrl/107:0153-0452-0243:c:3/5 z:31/66 - ctrl/107	36.76	66.62	1.50779	1.60106	2.17703	1.51807
190406 Ctrl DMSO Inhibitor C1 DAPI C2 BF C3 Factin C4 Gata3 C5 Pard6.lif - ctrl/107:0153-0472-0243:c:3/5 z:31/66 - ctrl/107	25.9	33.44
190406 Ctrl DMSO Inhibitor C1 DAPI C2 BF C3 Factin C4 Gata3 C5 Pard6.lif - ctrl/107:0153-0480-0290:c:3/5 z:31/66 - ctrl/107	24.38	41.61
190406 Ctrl DMSO Inhibitor C1 DAPI C2 BF C3 Factin C4 Gata3 C5 Pard6.lif - ctrl/107:0118-0310-0488:c:3/5 z:24/66 - ctrl/107	74.55	38.94	1.21318	1.11162
190406 Ctrl DMSO Inhibitor C1 DAPI C2 BF C3 Factin C4 Gata3 C5 Pard6.lif - ctrl/107:0118-0342-0471:c:3/5 z:24/66 - ctrl/107	52.67	35.01
190406 Ctrl DMSO Inhibitor C1 DAPI C2 BF C3 Factin C4 Gata3 C5 Pard6.lif - ctrl/107:0118-0371-0476:c:3/5 z:24/66 - ctrl/107	61.45	35.03
190406 Ctrl DMSO Inhibitor C1 DAPI C2 BF C3 Factin C4 Gata3 C5 Pard6.lif - ctrl/107:0118-0496-0674:c:3/5 z:24/66 - ctrl/107	70.94	36.95	4.1754	0.9021
190406 Ctrl DMSO Inhibitor C1 DAPI C2 BF C3 Factin C4 Gata3 C5 Pard6.lif - ctrl/107:0118-0542-0676:c:3/5 z:24/66 - ctrl/107	10.48	30.92
190406 Ctrl DMSO Inhibitor C1 DAPI C2 BF C3 Factin C4 Gata3 C5 Pard6.lif - ctrl/107:0118-0498-0566:c:3/5 z:24/66 - ctrl/107	16.99	40.96
190406 Ctrl DMSO Inhibitor C1 DAPI C2 BF C3 Factin C4 Gata3 C5 Pard6.lif - ctrl/107:0153-0686-0731:c:3/5 z:31/66 - ctrl/107	32.44	52.88	3.08072	1.90627
190406 Ctrl DMSO Inhibitor C1 DAPI C2 BF C3 Factin C4 Gata3 C5 Pard6.lif - ctrl/107:0153-0726-0716:c:3/5 z:31/66 - ctrl/107	19.14	28.23
190406 Ctrl DMSO Inhibitor C1 DAPI C2 BF C3 Factin C4 Gata3 C5 Pard6.lif - ctrl/107:0153-0731-0632:c:3/5 z:31/66 - ctrl/107	10.53	27.74
190406 Ctrl DMSO Inhibitor C1 DAPI C2 BF C3 Factin C4 Gata3 C5 Pard6.lif - ctrl/107:0153-0765-0245:c:3/5 z:31/66 - ctrl/107	46.5	67.74	1.02491	1.56987
190406 Ctrl DMSO Inhibitor C1 DAPI C2 BF C3 Factin C4 Gata3 C5 Pard6.lif - ctrl/107:0153-0754-0242:c:3/5 z:31/66 - ctrl/107	27.33	46.32
190406 Ctrl DMSO Inhibitor C1 DAPI C2 BF C3 Factin C4 Gata3 C5 Pard6.lif - ctrl/107:0153-0686-0247:c:3/5 z:31/66 - ctrl/107	45.37	43.15
190406 Ctrl DMSO Inhibitor C1 DAPI C2 BF C3 Factin C4 Gata3 C5 Pard6.lif - ctrl/107:0183-0766-0244:c:3/5 z:37/66 - ctrl/107	47.59	62.94	2.06017	1.78401
190406 Ctrl DMSO Inhibitor C1 DAPI C2 BF C3 Factin C4 Gata3 C5 Pard6.lif - ctrl/107:0183-0740-0246:c:3/5 z:37/66 - ctrl/107	11.94	32.87
190406 Ctrl DMSO Inhibitor C1 DAPI C2 BF C3 Factin C4 Gata3 C5 Pard6.lif - ctrl/107:0183-0674-0250:c:3/5 z:37/66 - ctrl/107	23.1	35.28
apical		59.5		1.75155
cytoplasm		30.82
basal		33.97
Embryo 134
190613 Media only DMSO inhibitor 5uM C1Factin C2Gata3 C3Pard6b C4 DAPI C5BF.lif - media only/134:0191-0251-0368:c:1/5 z:39/78 - media only/134	64.05	62.23	1.17782	1.35607	1.58978	1.54373
190613 Media only DMSO inhibitor 5uM C1Factin C2Gata3 C3Pard6b C4 DAPI C5BF.lif - media only/134:0191-0265-0351:c:1/5 z:39/78 - media only/134	57.06	48.26
190613 Media only DMSO inhibitor 5uM C1Factin C2Gata3 C3Pard6b C4 DAPI C5BF.lif - media only/134:0191-0323-0333:c:1/5 z:39/78 - media only/134	54.38	45.89
190613 Media only DMSO inhibitor 5uM C1Factin C2Gata3 C3Pard6b C4 DAPI C5BF.lif - media only/134:0191-0211-0607:c:1/5 z:39/78 - media only/134	63.52	62.75	1.3311	1.55978
190613 Media only DMSO inhibitor 5uM C1Factin C2Gata3 C3Pard6b C4 DAPI C5BF.lif - media only/134:0191-0257-0670:c:1/5 z:39/78 - media only/134	58.61	37.57
190613 Media only DMSO inhibitor 5uM C1Factin C2Gata3 C3Pard6b C4 DAPI C5BF.lif - media only/134:0191-0299-0651:c:1/5 z:39/78 - media only/134	47.72	40.23
190613 Media only DMSO inhibitor 5uM C1Factin C2Gata3 C3Pard6b C4 DAPI C5BF.lif - media only/134:0191-0406-0773:c:1/5 z:39/78 - media only/134	84.27	49.45	1.37203	1.1718
190613 Media only DMSO inhibitor 5uM C1Factin C2Gata3 C3Pard6b C4 DAPI C5BF.lif - media only/134:0191-0455-0796:c:1/5 z:39/78 - media only/134	37.81	40.18
190613 Media only DMSO inhibitor 5uM C1Factin C2Gata3 C3Pard6b C4 DAPI C5BF.lif - media only/134:0191-0495-0728:c:1/5 z:39/78 - media only/134	61.42	42.2
190613 Media only DMSO inhibitor 5uM C1Factin C2Gata3 C3Pard6b C4 DAPI C5BF.lif - media only/134:0191-0842-0401:c:1/5 z:39/78 - media only/134	53.28	49.87	1.1772	1.28963
190613 Media only DMSO inhibitor 5uM C1Factin C2Gata3 C3Pard6b C4 DAPI C5BF.lif - media only/134:0191-0815-0414:c:1/5 z:39/78 - media only/134	60.61	34.91
190613 Media only DMSO inhibitor 5uM C1Factin C2Gata3 C3Pard6b C4 DAPI C5BF.lif - media only/134:0191-0729-0366:c:1/5 z:39/78 - media only/134	45.26	38.67
190613 Media only DMSO inhibitor 5uM C1Factin C2Gata3 C3Pard6b C4 DAPI C5BF.lif - media only/134:0191-0804-0626:c:1/5 z:39/78 - media only/134	66.95	63.92	2.89076	2.34139
190613 Media only DMSO inhibitor 5uM C1Factin C2Gata3 C3Pard6b C4 DAPI C5BF.lif - media only/134:0191-0792-0623:c:1/5 z:39/78 - media only/134	71.84	39.68
190613 Media only DMSO inhibitor 5uM C1Factin C2Gata3 C3Pard6b C4 DAPI C5BF.lif - media only/134:0191-0772-0534:c:1/5 z:39/78 - media only/134	23.16	27.3
Embryo 133
190613 Media only DMSO inhibitor 5uM C1Factin C2Gata3 C3Pard6b C4 DAPI C5BF.lif - media only/133:0196-0675-0370:c:1/5 z:40/78 - media only/133	127.97	66.42	3.28634	1.44769	1.91775	1.35181
190613 Media only DMSO inhibitor 5uM C1Factin C2Gata3 C3Pard6b C4 DAPI C5BF.lif - media only/133:0196-0587-0381:c:1/5 z:40/78 - media only/133	62.25	34.39
190613 Media only DMSO inhibitor 5uM C1Factin C2Gata3 C3Pard6b C4 DAPI C5BF.lif - media only/133:0196-0504-0392:c:1/5 z:40/78 - media only/133	38.94	45.88
190613 Media only DMSO inhibitor 5uM C1Factin C2Gata3 C3Pard6b C4 DAPI C5BF.lif - media only/133:0196-0795-0505:c:1/5 z:40/78 - media only/133	115.53	52.96	3.23795	1.32632
190613 Media only DMSO inhibitor 5uM C1Factin C2Gata3 C3Pard6b C4 DAPI C5BF.lif - media only/133:0196-0736-0533:c:1/5 z:40/78 - media only/133	39.12	48.05
190613 Media only DMSO inhibitor 5uM C1Factin C2Gata3 C3Pard6b C4 DAPI C5BF.lif - media only/133:0196-0724-0582:c:1/5 z:40/78 - media only/133	35.68	39.93
190613 Media only DMSO inhibitor 5uM C1Factin C2Gata3 C3Pard6b C4 DAPI C5BF.lif - media only/133:0191-0784-0595:c:1/5 z:36/78 - media only/133	56.61	39.36	0.99683	1.2551
190613 Media only DMSO inhibitor 5uM C1Factin C2Gata3 C3Pard6b C4 DAPI C5BF.lif - media only/133:0191-0731-0637:c:1/5 z:36/78 - media only/133	38.17	54.13
190613 Media only DMSO inhibitor 5uM C1Factin C2Gata3 C3Pard6b C4 DAPI C5BF.lif - media only/133:0191-0697-0710:c:1/5 z:36/78 - media only/133	56.79	31.36
190613 Media only DMSO inhibitor 5uM C1Factin C2Gata3 C3Pard6b C4 DAPI C5BF.lif - media only/133:0191-0806-0770:c:1/5 z:36/78 - media only/133	32.76	53.76	0.441926	1.37811
190613 Media only DMSO inhibitor 5uM C1Factin C2Gata3 C3Pard6b C4 DAPI C5BF.lif - media only/133:0191-0778-0805:c:1/5 z:36/78 - media only/133	16.59	46.5
190613 Media only DMSO inhibitor 5uM C1Factin C2Gata3 C3Pard6b C4 DAPI C5BF.lif - media only/133:0191-0641-0748:c:1/5 z:36/78 - media only/133	74.13	39.01
190613 Media only DMSO inhibitor 5uM C1Factin C2Gata3 C3Pard6b C4 DAPI C5BF.lif - media only/133:0151-0212-0580:c:1/5 z:31/78 - media only/133	77.66		1.62571
190613 Media only DMSO inhibitor 5uM C1Factin C2Gata3 C3Pard6b C4 DAPI C5BF.lif - media only/133:0151-0219-0668:c:1/5 z:31/78 - media only/133	123.93
190613 Media only DMSO inhibitor 5uM C1Factin C2Gata3 C3Pard6b C4 DAPI C5BF.lif - media only/133:0151-0399-0594:c:1/5 z:31/78 - media only/133	47.77
Embryo 210
220120 C1-PARD6B C2-GATA3 C3-DAPI BF C4-FACTIN 7.5uM U73122 treatment DMSO media ctrl.lif - ctrl media/210:0195-0378-0510:c:5/5 z:39/76 - ctrl media/210	75.03	114.12	3.54584	1.94412	1.72887	1.91325
220120 C1-PARD6B C2-GATA3 C3-DAPI BF C4-FACTIN 7.5uM U73122 treatment DMSO media ctrl.lif - ctrl media/210:0195-0394-0511:c:5/5 z:39/76 - ctrl media/210	31.89	50.35
220120 C1-PARD6B C2-GATA3 C3-DAPI BF C4-FACTIN 7.5uM U73122 treatment DMSO media ctrl.lif - ctrl media/210:0195-0509-0464:c:5/5 z:39/76 - ctrl media/210	21.16	58.7
220120 C1-PARD6B C2-GATA3 C3-DAPI BF C4-FACTIN 7.5uM U73122 treatment DMSO media ctrl.lif - ctrl media/210:0195-0691-0365:c:5/5 z:39/76 - ctrl media/210	65.63	100.92	1.07361	1.79318
220120 C1-PARD6B C2-GATA3 C3-DAPI BF C4-FACTIN 7.5uM U73122 treatment DMSO media ctrl.lif - ctrl media/210:0195-0677-0382:c:5/5 z:39/76 - ctrl media/210	29.06	42.73
220120 C1-PARD6B C2-GATA3 C3-DAPI BF C4-FACTIN 7.5uM U73122 treatment DMSO media ctrl.lif - ctrl media/210:0195-0641-0332:c:5/5 z:39/76 - ctrl media/210	61.13	56.28
220120 C1-PARD6B C2-GATA3 C3-DAPI BF C4-FACTIN 7.5uM U73122 treatment DMSO media ctrl.lif - ctrl media/210:0195-0746-0491:c:5/5 z:39/76 - ctrl media/210	51.14	91.59	1.59513	1.53033
220120 C1-PARD6B C2-GATA3 C3-DAPI BF C4-FACTIN 7.5uM U73122 treatment DMSO media ctrl.lif - ctrl media/210:0195-0713-0527:c:5/5 z:39/76 - ctrl media/210	21.46	48.15
220120 C1-PARD6B C2-GATA3 C3-DAPI BF C4-FACTIN 7.5uM U73122 treatment DMSO media ctrl.lif - ctrl media/210:0195-0675-0507:c:5/5 z:39/76 - ctrl media/210	32.06	59.85
220120 C1-PARD6B C2-GATA3 C3-DAPI BF C4-FACTIN 7.5uM U73122 treatment DMSO media ctrl.lif - ctrl media/210:0195-0710-0664:c:5/5 z:39/76 - ctrl media/210	47.15	79.95	1.13916	2.49454
220120 C1-PARD6B C2-GATA3 C3-DAPI BF C4-FACTIN 7.5uM U73122 treatment DMSO media ctrl.lif - ctrl media/210:0195-0679-0644:c:5/5 z:39/76 - ctrl media/210	46.57	33.44
220120 C1-PARD6B C2-GATA3 C3-DAPI BF C4-FACTIN 7.5uM U73122 treatment DMSO media ctrl.lif - ctrl media/210:0195-0665-0591:c:5/5 z:39/76 - ctrl media/210	41.39	32.05
220120 C1-PARD6B C2-GATA3 C3-DAPI BF C4-FACTIN 7.5uM U73122 treatment DMSO media ctrl.lif - ctrl media/210:0135-0598-0636:c:5/5 z:27/76 - ctrl media/210	83.49	62.42	1.29062	2.16136
220120 C1-PARD6B C2-GATA3 C3-DAPI BF C4-FACTIN 7.5uM U73122 treatment DMSO media ctrl.lif - ctrl media/210:0135-0601-0618:c:5/5 z:27/76 - ctrl media/210	33.71	21.54
220120 C1-PARD6B C2-GATA3 C3-DAPI BF C4-FACTIN 7.5uM U73122 treatment DMSO media ctrl.lif - ctrl media/210:0135-0605-0542:c:5/5 z:27/76 - ctrl media/210	64.69	28.88
apical		50.95		1.71954
cytoplasm		21.67
basal		29.63
apical		54.73		1.74968
cytoplasm		30.68
basal		31.28
Embryo 209
220120 C1-PARD6B C2-GATA3 C3-DAPI BF C4-FACTIN 7.5uM U73122 treatment DMSO media ctrl.lif - ctrl media/209:0205-0653-0707:c:5/5 z:41/81 - ctrl media/209	59.61	47.71	1.65216	1.14166	2.14857	1.10284
220120 C1-PARD6B C2-GATA3 C3-DAPI BF C4-FACTIN 7.5uM U73122 treatment DMSO media ctrl.lif - ctrl media/209:0205-0655-0717:c:5/5 z:41/81 - ctrl media/209	30.68	37.22
220120 C1-PARD6B C2-GATA3 C3-DAPI BF C4-FACTIN 7.5uM U73122 treatment DMSO media ctrl.lif - ctrl media/209:0205-0641-0677:c:5/5 z:41/81 - ctrl media/209	36.08	41.79
220120 C1-PARD6B C2-GATA3 C3-DAPI BF C4-FACTIN 7.5uM U73122 treatment DMSO media ctrl.lif - ctrl media/209:0205-0497-0688:c:5/5 z:41/81 - ctrl media/209	97.23	30.09	2.80849	0.713033
220120 C1-PARD6B C2-GATA3 C3-DAPI BF C4-FACTIN 7.5uM U73122 treatment DMSO media ctrl.lif - ctrl media/209:0205-0516-0676:c:5/5 z:41/81 - ctrl media/209	53.69	52.68
220120 C1-PARD6B C2-GATA3 C3-DAPI BF C4-FACTIN 7.5uM U73122 treatment DMSO media ctrl.lif - ctrl media/209:0205-0538-0598:c:5/5 z:41/81 - ctrl media/209	34.62	42.2
220120 C1-PARD6B C2-GATA3 C3-DAPI BF C4-FACTIN 7.5uM U73122 treatment DMSO media ctrl.lif - ctrl media/209:0160-0796-0565:c:5/5 z:32/81 - ctrl media/209	65.64	48.06	2.21757	1.01307
220120 C1-PARD6B C2-GATA3 C3-DAPI BF C4-FACTIN 7.5uM U73122 treatment DMSO media ctrl.lif - ctrl media/209:0160-0781-0591:c:5/5 z:32/81 - ctrl media/209	44.5	35.96
220120 C1-PARD6B C2-GATA3 C3-DAPI BF C4-FACTIN 7.5uM U73122 treatment DMSO media ctrl.lif - ctrl media/209:0160-0738-0492:c:5/5 z:32/81 - ctrl media/209	29.6	47.44
220120 C1-PARD6B C2-GATA3 C3-DAPI BF C4-FACTIN 7.5uM U73122 treatment DMSO media ctrl.lif - ctrl media/209:0160-0768-0435:c:5/5 z:32/81 - ctrl media/209	147.88	58.19	4.15393	1.20302
220120 C1-PARD6B C2-GATA3 C3-DAPI BF C4-FACTIN 7.5uM U73122 treatment DMSO media ctrl.lif - ctrl media/209:0160-0719-0440:c:5/5 z:32/81 - ctrl media/209	23.72	44.92
220120 C1-PARD6B C2-GATA3 C3-DAPI BF C4-FACTIN 7.5uM U73122 treatment DMSO media ctrl.lif - ctrl media/209:0160-0706-0460:c:5/5 z:32/81 - ctrl media/209	35.6	48.37
220120 C1-PARD6B C2-GATA3 C3-DAPI BF C4-FACTIN 7.5uM U73122 treatment DMSO media ctrl.lif - ctrl media/209:0175-0490-0468:c:5/5 z:37/81 - ctrl media/209	42.97	56.9	1.30847	1.22656
220120 C1-PARD6B C2-GATA3 C3-DAPI BF C4-FACTIN 7.5uM U73122 treatment DMSO media ctrl.lif - ctrl media/209:0175-0494-0472:c:5/5 z:37/81 - ctrl media/209	31.69	44.17
220120 C1-PARD6B C2-GATA3 C3-DAPI BF C4-FACTIN 7.5uM U73122 treatment DMSO media ctrl.lif - ctrl media/209:0175-0522-0492:c:5/5 z:37/81 - ctrl media/209	32.84	46.39
220120 C1-PARD6B C2-GATA3 C3-DAPI BF C4-FACTIN 7.5uM U73122 treatment DMSO media ctrl.lif - ctrl media/209:0105-0521-0441:c:5/5 z:19/81 - ctrl media/209	81.35	61.84	1.72352	1.31968
220120 C1-PARD6B C2-GATA3 C3-DAPI BF C4-FACTIN 7.5uM U73122 treatment DMSO media ctrl.lif - ctrl media/209:0105-0531-0455:c:5/5 z:19/81 - ctrl media/209	61.73	38.98
220120 C1-PARD6B C2-GATA3 C3-DAPI BF C4-FACTIN 7.5uM U73122 treatment DMSO media ctrl.lif - ctrl media/209:0105-0524-0526:c:5/5 z:19/81 - ctrl media/209	47.2	46.86
220120 C1-PARD6B C2-GATA3 C3-DAPI BF C4-FACTIN 7.5uM U73122 treatment DMSO media ctrl.lif - ctrl media/209:0105-0446-0548:c:5/5 z:19/81 - ctrl media/209	53.42		0.785935
220120 C1-PARD6B C2-GATA3 C3-DAPI BF C4-FACTIN 7.5uM U73122 treatment DMSO media ctrl.lif - ctrl media/209:0105-0515-0583:c:5/5 z:19/81 - ctrl media/209	59.67
220120 C1-PARD6B C2-GATA3 C3-DAPI BF C4-FACTIN 7.5uM U73122 treatment DMSO media ctrl.lif - ctrl media/209:0105-0501-0631:c:5/5 z:19/81 - ctrl media/209	67.97
220120 C1-PARD6B C2-GATA3 C3-DAPI BF C4-FACTIN 7.5uM U73122 treatment DMSO media ctrl.lif - ctrl media/209:0105-0431-0662:c:5/5 z:19/81 - ctrl media/209	35.16		0.742085
220120 C1-PARD6B C2-GATA3 C3-DAPI BF C4-FACTIN 7.5uM U73122 treatment DMSO media ctrl.lif - ctrl media/209:0105-0498-0692:c:5/5 z:19/81 - ctrl media/209	70.12
220120 C1-PARD6B C2-GATA3 C3-DAPI BF C4-FACTIN 7.5uM U73122 treatment DMSO media ctrl.lif - ctrl media/209:0105-0542-0674:c:5/5 z:19/81 - ctrl media/209	47.38
220120 C1-PARD6B C2-GATA3 C3-DAPI BF C4-FACTIN 7.5uM U73122 treatment DMSO media ctrl.lif - ctrl media/209:0105-0667-0716:c:5/5 z:19/81 - ctrl media/209	174.17		3.94496
220120 C1-PARD6B C2-GATA3 C3-DAPI BF C4-FACTIN 7.5uM U73122 treatment DMSO media ctrl.lif - ctrl media/209:0105-0651-0665:c:5/5 z:19/81 - ctrl media/209	64.4
220120 C1-PARD6B C2-GATA3 C3-DAPI BF C4-FACTIN 7.5uM U73122 treatment DMSO media ctrl.lif - ctrl media/209:0105-0674-0640:c:5/5 z:19/81 - ctrl media/209	44.15
Embryo 208
220120 C1-PARD6B C2-GATA3 C3-DAPI BF C4-FACTIN 7.5uM U73122 treatment DMSO media ctrl.lif - ctrl media/208:0205-0590-0679:c:5/5 z:41/81 - ctrl media/208	121.79	41.25	3.45896	1.07143	2.95424	0.887244
220120 C1-PARD6B C2-GATA3 C3-DAPI BF C4-FACTIN 7.5uM U73122 treatment DMSO media ctrl.lif - ctrl media/208:0205-0564-0662:c:5/5 z:41/81 - ctrl media/208	41.36	42.23
220120 C1-PARD6B C2-GATA3 C3-DAPI BF C4-FACTIN 7.5uM U73122 treatment DMSO media ctrl.lif - ctrl media/208:0205-0559-0607:c:5/5 z:41/81 - ctrl media/208	35.21	38.5
220120 C1-PARD6B C2-GATA3 C3-DAPI BF C4-FACTIN 7.5uM U73122 treatment DMSO media ctrl.lif - ctrl media/208:0205-0457-0802:c:5/5 z:41/81 - ctrl media/208	87.42	55.93	2.60955	0.987116
220120 C1-PARD6B C2-GATA3 C3-DAPI BF C4-FACTIN 7.5uM U73122 treatment DMSO media ctrl.lif - ctrl media/208:0205-0463-0765:c:5/5 z:41/81 - ctrl media/208	42.3	41.94
220120 C1-PARD6B C2-GATA3 C3-DAPI BF C4-FACTIN 7.5uM U73122 treatment DMSO media ctrl.lif - ctrl media/208:0205-0506-0723:c:5/5 z:41/81 - ctrl media/208	33.5	56.66
220120 C1-PARD6B C2-GATA3 C3-DAPI BF C4-FACTIN 7.5uM U73122 treatment DMSO media ctrl.lif - ctrl media/208:0185-0583-0525:c:5/5 z:37/81 - ctrl media/208	85.59	38.28	2.15375	0.936858
220120 C1-PARD6B C2-GATA3 C3-DAPI BF C4-FACTIN 7.5uM U73122 treatment DMSO media ctrl.lif - ctrl media/208:0185-0561-0565:c:5/5 z:37/81 - ctrl media/208	45.31	37.39
220120 C1-PARD6B C2-GATA3 C3-DAPI BF C4-FACTIN 7.5uM U73122 treatment DMSO media ctrl.lif - ctrl media/208:0185-0561-0600:c:5/5 z:37/81 - ctrl media/208	39.74	40.86
220120 C1-PARD6B C2-GATA3 C3-DAPI BF C4-FACTIN 7.5uM U73122 treatment DMSO media ctrl.lif - ctrl media/208:0185-0224-0662:c:5/5 z:37/81 - ctrl media/208	182.09	35.09	4.55453	0.769855
220120 C1-PARD6B C2-GATA3 C3-DAPI BF C4-FACTIN 7.5uM U73122 treatment DMSO media ctrl.lif - ctrl media/208:0185-0281-0648:c:5/5 z:37/81 - ctrl media/208	41.63	30.9
220120 C1-PARD6B C2-GATA3 C3-DAPI BF C4-FACTIN 7.5uM U73122 treatment DMSO media ctrl.lif - ctrl media/208:0185-0311-0659:c:5/5 z:37/81 - ctrl media/208	39.98	45.58
220120 C1-PARD6B C2-GATA3 C3-DAPI BF C4-FACTIN 7.5uM U73122 treatment DMSO media ctrl.lif - ctrl media/208:0185-0315-0770:c:5/5 z:37/81 - ctrl media/208	84.29	45.73	2.76633	1.17046
220120 C1-PARD6B C2-GATA3 C3-DAPI BF C4-FACTIN 7.5uM U73122 treatment DMSO media ctrl.lif - ctrl media/208:0185-0317-0758:c:5/5 z:37/81 - ctrl media/208	44.82	33.96
220120 C1-PARD6B C2-GATA3 C3-DAPI BF C4-FACTIN 7.5uM U73122 treatment DMSO media ctrl.lif - ctrl media/208:0185-0296-0704:c:5/5 z:37/81 - ctrl media/208	30.47	39.07
220120 C1-PARD6B C2-GATA3 C3-DAPI BF C4-FACTIN 7.5uM U73122 treatment DMSO media ctrl.lif - ctrl media/208:0185-0203-0534:c:5/5 z:37/81 - ctrl media/208	104.86	16.39	2.18231	0.387745
220120 C1-PARD6B C2-GATA3 C3-DAPI BF C4-FACTIN 7.5uM U73122 treatment DMSO media ctrl.lif - ctrl media/208:0185-0203-0524:c:5/5 z:37/81 - ctrl media/208	52.39	29.77
220120 C1-PARD6B C2-GATA3 C3-DAPI BF C4-FACTIN 7.5uM U73122 treatment DMSO media ctrl.lif - ctrl media/208:0185-0239-0545:c:5/5 z:37/81 - ctrl media/208	48.05	42.27
Embryo 207
220120 C1-PARD6B C2-GATA3 C3-DAPI BF C4-FACTIN 7.5uM U73122 treatment DMSO media ctrl.lif - ctrl media/207:0180-0446-0289:c:5/5 z:36/81 - ctrl media/207	162.64	74.18	5.60248	2.65688	2.91066	1.35148
220120 C1-PARD6B C2-GATA3 C3-DAPI BF C4-FACTIN 7.5uM U73122 treatment DMSO media ctrl.lif - ctrl media/207:0180-0499-0332:c:5/5 z:36/81 - ctrl media/207	29.33	28.06
220120 C1-PARD6B C2-GATA3 C3-DAPI BF C4-FACTIN 7.5uM U73122 treatment DMSO media ctrl.lif - ctrl media/207:0180-0540-0316:c:5/5 z:36/81 - ctrl media/207	29.03	27.92
220120 C1-PARD6B C2-GATA3 C3-DAPI BF C4-FACTIN 7.5uM U73122 treatment DMSO media ctrl.lif - ctrl media/207:0180-0574-0272:c:5/5 z:36/81 - ctrl media/207	71.48	33.52	2.73555	1.03107
220120 C1-PARD6B C2-GATA3 C3-DAPI BF C4-FACTIN 7.5uM U73122 treatment DMSO media ctrl.lif - ctrl media/207:0180-0595-0318:c:5/5 z:36/81 - ctrl media/207	15.6	28.78
220120 C1-PARD6B C2-GATA3 C3-DAPI BF C4-FACTIN 7.5uM U73122 treatment DMSO media ctrl.lif - ctrl media/207:0180-0539-0318:c:5/5 z:36/81 - ctrl media/207	26.13	32.51
220120 C1-PARD6B C2-GATA3 C3-DAPI BF C4-FACTIN 7.5uM U73122 treatment DMSO media ctrl.lif - ctrl media/207:0180-0351-0345:c:5/5 z:36/81 - ctrl media/207	67.93	21.9	1.28001	0.554571
220120 C1-PARD6B C2-GATA3 C3-DAPI BF C4-FACTIN 7.5uM U73122 treatment DMSO media ctrl.lif - ctrl media/207:0180-0379-0369:c:5/5 z:36/81 - ctrl media/207	29.02	32.37
220120 C1-PARD6B C2-GATA3 C3-DAPI BF C4-FACTIN 7.5uM U73122 treatment DMSO media ctrl.lif - ctrl media/207:0180-0419-0347:c:5/5 z:36/81 - ctrl media/207	53.07	39.49
220120 C1-PARD6B C2-GATA3 C3-DAPI BF C4-FACTIN 7.5uM U73122 treatment DMSO media ctrl.lif - ctrl media/207:0205-0358-0511:c:5/5 z:43/81 - ctrl media/207	86.43	86.49	2.00348	2.16821
220120 C1-PARD6B C2-GATA3 C3-DAPI BF C4-FACTIN 7.5uM U73122 treatment DMSO media ctrl.lif - ctrl media/207:0205-0384-0478:c:5/5 z:43/81 - ctrl media/207	33.36	37.86
220120 C1-PARD6B C2-GATA3 C3-DAPI BF C4-FACTIN 7.5uM U73122 treatment DMSO media ctrl.lif - ctrl media/207:0205-0449-0527:c:5/5 z:43/81 - ctrl media/207	43.14	39.89
220120 C1-PARD6B C2-GATA3 C3-DAPI BF C4-FACTIN 7.5uM U73122 treatment DMSO media ctrl.lif - ctrl media/207:0215-0465-0629:c:5/5 z:43/81 - ctrl media/207	67.11	56.9	2.0226	1.1274
220120 C1-PARD6B C2-GATA3 C3-DAPI BF C4-FACTIN 7.5uM U73122 treatment DMSO media ctrl.lif - ctrl media/207:0215-0479-0571:c:5/5 z:43/81 - ctrl media/207	34.68	45.13
220120 C1-PARD6B C2-GATA3 C3-DAPI BF C4-FACTIN 7.5uM U73122 treatment DMSO media ctrl.lif - ctrl media/207:0215-0559-0582:c:5/5 z:43/81 - ctrl media/207	33.18	50.47
220120 C1-PARD6B C2-GATA3 C3-DAPI BF C4-FACTIN 7.5uM U73122 treatment DMSO media ctrl.lif - ctrl media/207:0215-0697-0417:c:5/5 z:43/81 - ctrl media/207	55.59	52.01	1.6744	1.10261
220120 C1-PARD6B C2-GATA3 C3-DAPI BF C4-FACTIN 7.5uM U73122 treatment DMSO media ctrl.lif - ctrl media/207:0215-0721-0418:c:5/5 z:43/81 - ctrl media/207	24.32	50.07
220120 C1-PARD6B C2-GATA3 C3-DAPI BF C4-FACTIN 7.5uM U73122 treatment DMSO media ctrl.lif - ctrl media/207:0215-0671-0445:c:5/5 z:43/81 - ctrl media/207	33.2	47.17
220120 C1-PARD6B C2-GATA3 C3-DAPI BF C4-FACTIN 7.5uM U73122 treatment DMSO media ctrl.lif - ctrl media/207:0215-0714-0536:c:5/5 z:43/81 - ctrl media/207	145.97	52.64	5.05611	1.21207
220120 C1-PARD6B C2-GATA3 C3-DAPI BF C4-FACTIN 7.5uM U73122 treatment DMSO media ctrl.lif - ctrl media/207:0215-0682-0514:c:5/5 z:43/81 - ctrl media/207	30.57	30.91
220120 C1-PARD6B C2-GATA3 C3-DAPI BF C4-FACTIN 7.5uM U73122 treatment DMSO media ctrl.lif - ctrl media/207:0215-0600-0465:c:5/5 z:43/81 - ctrl media/207	28.87	43.43
apical		47.96		0.959008
cytoplasm		50.15
basal		50.01
Embryo 206
220120 C1-PARD6B C2-GATA3 C3-DAPI BF C4-FACTIN 7.5uM U73122 treatment DMSO media ctrl.lif - ctrl media/206:0135-0444-0688:c:5/5 z:27/81 - ctrl media/206	37.27	79.03	0.748394	1.72366	0.770846	1.67143
220120 C1-PARD6B C2-GATA3 C3-DAPI BF C4-FACTIN 7.5uM U73122 treatment DMSO media ctrl.lif - ctrl media/206:0135-0459-0692:c:5/5 z:27/81 - ctrl media/206	18.4	38.23
220120 C1-PARD6B C2-GATA3 C3-DAPI BF C4-FACTIN 7.5uM U73122 treatment DMSO media ctrl.lif - ctrl media/206:0135-0453-0641:c:5/5 z:27/81 - ctrl media/206	49.8	45.85
220120 C1-PARD6B C2-GATA3 C3-DAPI BF C4-FACTIN 7.5uM U73122 treatment DMSO media ctrl.lif - ctrl media/206:0135-0574-0716:c:5/5 z:27/81 - ctrl media/206	49.85	76.66	0.769171	2.09282
220120 C1-PARD6B C2-GATA3 C3-DAPI BF C4-FACTIN 7.5uM U73122 treatment DMSO media ctrl.lif - ctrl media/206:0135-0573-0696:c:5/5 z:27/81 - ctrl media/206	37.37	34.28
220120 C1-PARD6B C2-GATA3 C3-DAPI BF C4-FACTIN 7.5uM U73122 treatment DMSO media ctrl.lif - ctrl media/206:0135-0626-0654:c:5/5 z:27/81 - ctrl media/206	64.81	36.63
220120 C1-PARD6B C2-GATA3 C3-DAPI BF C4-FACTIN 7.5uM U73122 treatment DMSO media ctrl.lif - ctrl media/206:0135-0680-0636:c:5/5 z:27/81 - ctrl media/206	52.76	65.05	0.915972	1.60498
220120 C1-PARD6B C2-GATA3 C3-DAPI BF C4-FACTIN 7.5uM U73122 treatment DMSO media ctrl.lif - ctrl media/206:0135-0684-0627:c:5/5 z:27/81 - ctrl media/206	35.36	29.72
220120 C1-PARD6B C2-GATA3 C3-DAPI BF C4-FACTIN 7.5uM U73122 treatment DMSO media ctrl.lif - ctrl media/206:0135-0661-0587:c:5/5 z:27/81 - ctrl media/206	57.6	40.53
220120 C1-PARD6B C2-GATA3 C3-DAPI BF C4-FACTIN 7.5uM U73122 treatment DMSO media ctrl.lif - ctrl media/206:0135-0665-0389:c:5/5 z:27/81 - ctrl media/206	65.76	40.36	0.869151	1.26362
220120 C1-PARD6B C2-GATA3 C3-DAPI BF C4-FACTIN 7.5uM U73122 treatment DMSO media ctrl.lif - ctrl media/206:0135-0676-0407:c:5/5 z:27/81 - ctrl media/206	34.41	25.07
220120 C1-PARD6B C2-GATA3 C3-DAPI BF C4-FACTIN 7.5uM U73122 treatment DMSO media ctrl.lif - ctrl media/206:0135-0599-0351:c:5/5 z:27/81 - ctrl media/206	75.66	31.94
220120 C1-PARD6B C2-GATA3 C3-DAPI BF C4-FACTIN 7.5uM U73122 treatment DMSO media ctrl.lif - ctrl media/206:0135-0529-0299:c:5/5 z:27/81 - ctrl media/206	53.88	82.16	0.551541	1.82618
220120 C1-PARD6B C2-GATA3 C3-DAPI BF C4-FACTIN 7.5uM U73122 treatment DMSO media ctrl.lif - ctrl media/206:0135-0518-0310:c:5/5 z:27/81 - ctrl media/206	39.16	42.75
220120 C1-PARD6B C2-GATA3 C3-DAPI BF C4-FACTIN 7.5uM U73122 treatment DMSO media ctrl.lif - ctrl media/206:0135-0450-0340:c:5/5 z:27/81 - ctrl media/206	97.69	44.99
apical		35.4		0.868073
cytoplasm		34.1
basal		40.78
apical		47.76		2.3207
cytoplasm		28.06
basal		20.58
Embryo 205
220120 C1-PARD6B C2-GATA3 C3-DAPI BF C4-FACTIN 7.5uM U73122 treatment DMSO media ctrl.lif - ctrl media/205:0205-0732-0595:c:5/5 z:41/113 - ctrl media/205	77.23	38.29	2.15847	1.38032	1.26661	1.37672
220120 C1-PARD6B C2-GATA3 C3-DAPI BF C4-FACTIN 7.5uM U73122 treatment DMSO media ctrl.lif - ctrl media/205:0205-0716-0592:c:5/5 z:41/113 - ctrl media/205	42.62	28.51
220120 C1-PARD6B C2-GATA3 C3-DAPI BF C4-FACTIN 7.5uM U73122 treatment DMSO media ctrl.lif - ctrl media/205:0205-0666-0517:c:5/5 z:41/113 - ctrl media/205	35.78	27.74
220120 C1-PARD6B C2-GATA3 C3-DAPI BF C4-FACTIN 7.5uM U73122 treatment DMSO media ctrl.lif - ctrl media/205:0245-0539-0712:c:5/5 z:52/113 - ctrl media/205	27.93	26.45	0.630474	1.00303
220120 C1-PARD6B C2-GATA3 C3-DAPI BF C4-FACTIN 7.5uM U73122 treatment DMSO media ctrl.lif - ctrl media/205:0245-0574-0717:c:5/5 z:52/113 - ctrl media/205	30.06	19.64
220120 C1-PARD6B C2-GATA3 C3-DAPI BF C4-FACTIN 7.5uM U73122 treatment DMSO media ctrl.lif - ctrl media/205:0245-0631-0715:c:5/5 z:52/113 - ctrl media/205	44.3	26.37
220120 C1-PARD6B C2-GATA3 C3-DAPI BF C4-FACTIN 7.5uM U73122 treatment DMSO media ctrl.lif - ctrl media/205:0245-0455-0435:c:5/5 z:52/113 - ctrl media/205	38.11	37.59	1.18391	1.54374
220120 C1-PARD6B C2-GATA3 C3-DAPI BF C4-FACTIN 7.5uM U73122 treatment DMSO media ctrl.lif - ctrl media/205:0245-0443-0450:c:5/5 z:52/113 - ctrl media/205	26.89	25.79
220120 C1-PARD6B C2-GATA3 C3-DAPI BF C4-FACTIN 7.5uM U73122 treatment DMSO media ctrl.lif - ctrl media/205:0245-0411-0515:c:5/5 z:52/113 - ctrl media/205	32.19	24.35
220120 C1-PARD6B C2-GATA3 C3-DAPI BF C4-FACTIN 7.5uM U73122 treatment DMSO media ctrl.lif - ctrl media/205:0245-0346-0513:c:5/5 z:52/113 - ctrl media/205	34.59	43.24	1.09358	1.50925
220120 C1-PARD6B C2-GATA3 C3-DAPI BF C4-FACTIN 7.5uM U73122 treatment DMSO media ctrl.lif - ctrl media/205:0245-0357-0548:c:5/5 z:52/113 - ctrl media/205	29.19	45.89
220120 C1-PARD6B C2-GATA3 C3-DAPI BF C4-FACTIN 7.5uM U73122 treatment DMSO media ctrl.lif - ctrl media/205:0245-0415-0514:c:5/5 z:52/113 - ctrl media/205	31.63	28.65
apical		65.98		1.44725
cytoplasm		52.76
basal		45.59
Embryo 204
220120 C1-PARD6B C2-GATA3 C3-DAPI BF C4-FACTIN 7.5uM U73122 treatment DMSO media ctrl.lif - ctrl media/204:0355-0344-0707:c:5/5 z:71/113 - ctrl media/204	42.02	64.49	4.67929	3.0622	4.7521	1.7294
220120 C1-PARD6B C2-GATA3 C3-DAPI BF C4-FACTIN 7.5uM U73122 treatment DMSO media ctrl.lif - ctrl media/204:0355-0352-0699:c:5/5 z:71/113 - ctrl media/204	13.62	35.08
220120 C1-PARD6B C2-GATA3 C3-DAPI BF C4-FACTIN 7.5uM U73122 treatment DMSO media ctrl.lif - ctrl media/204:0355-0321-0657:c:5/5 z:71/113 - ctrl media/204	8.98	21.06
220120 C1-PARD6B C2-GATA3 C3-DAPI BF C4-FACTIN 7.5uM U73122 treatment DMSO media ctrl.lif - ctrl media/204:0355-0436-0746:c:5/5 z:71/113 - ctrl media/204	72.64	65.66	2.85984	0.764733
220120 C1-PARD6B C2-GATA3 C3-DAPI BF C4-FACTIN 7.5uM U73122 treatment DMSO media ctrl.lif - ctrl media/204:0355-0425-0704:c:5/5 z:71/113 - ctrl media/204	12.27	58.12
220120 C1-PARD6B C2-GATA3 C3-DAPI BF C4-FACTIN 7.5uM U73122 treatment DMSO media ctrl.lif - ctrl media/204:0355-0404-0707:c:5/5 z:71/113 - ctrl media/204	25.4	85.86
220120 C1-PARD6B C2-GATA3 C3-DAPI BF C4-FACTIN 7.5uM U73122 treatment DMSO media ctrl.lif - ctrl media/204:0355-0504-0735:c:5/5 z:71/113 - ctrl media/204	75.21	64.95	4.10535	0.606896
220120 C1-PARD6B C2-GATA3 C3-DAPI BF C4-FACTIN 7.5uM U73122 treatment DMSO media ctrl.lif - ctrl media/204:0355-0489-0694:c:5/5 z:71/113 - ctrl media/204	11.73	30.87
220120 C1-PARD6B C2-GATA3 C3-DAPI BF C4-FACTIN 7.5uM U73122 treatment DMSO media ctrl.lif - ctrl media/204:0355-0479-0643:c:5/5 z:71/113 - ctrl media/204	18.32	107.02
220120 C1-PARD6B C2-GATA3 C3-DAPI BF C4-FACTIN 7.5uM U73122 treatment DMSO media ctrl.lif - ctrl media/204:0305-0601-0692:c:5/5 z:61/113 - ctrl media/204	100.5	79.35	6.79513	2.55391
220120 C1-PARD6B C2-GATA3 C3-DAPI BF C4-FACTIN 7.5uM U73122 treatment DMSO media ctrl.lif - ctrl media/204:0305-0568-0691:c:5/5 z:61/113 - ctrl media/204	22.68	41.67
220120 C1-PARD6B C2-GATA3 C3-DAPI BF C4-FACTIN 7.5uM U73122 treatment DMSO media ctrl.lif - ctrl media/204:0305-0516-0655:c:5/5 z:61/113 - ctrl media/204	14.79	31.07
220120 C1-PARD6B C2-GATA3 C3-DAPI BF C4-FACTIN 7.5uM U73122 treatment DMSO media ctrl.lif - ctrl media/204:0305-0683-0601:c:5/5 z:61/113 - ctrl media/204	94.02	75.74	5.32088	1.57039
220120 C1-PARD6B C2-GATA3 C3-DAPI BF C4-FACTIN 7.5uM U73122 treatment DMSO media ctrl.lif - ctrl media/204:0305-0640-0584:c:5/5 z:61/113 - ctrl media/204	8.28	35.87
220120 C1-PARD6B C2-GATA3 C3-DAPI BF C4-FACTIN 7.5uM U73122 treatment DMSO media ctrl.lif - ctrl media/204:0305-0619-0608:c:5/5 z:61/113 - ctrl media/204	17.67	48.23
apical		92.04		1.81825
cytoplasm		44.85
basal		50.62
Embryo 203
220120 C1-PARD6B C2-GATA3 C3-DAPI BF C4-FACTIN 7.5uM U73122 treatment DMSO media ctrl.lif - ctrl media/203:0175-0602-0685:c:5/5 z:35/90 - ctrl media/203	58.03	39.58	1.37187	1.00152	1.03125	1.14131
220120 C1-PARD6B C2-GATA3 C3-DAPI BF C4-FACTIN 7.5uM U73122 treatment DMSO media ctrl.lif - ctrl media/203:0175-0588-0656:c:5/5 z:35/90 - ctrl media/203	42.54	32.64
220120 C1-PARD6B C2-GATA3 C3-DAPI BF C4-FACTIN 7.5uM U73122 treatment DMSO media ctrl.lif - ctrl media/203:0175-0538-0632:c:5/5 z:35/90 - ctrl media/203	42.3	39.52
220120 C1-PARD6B C2-GATA3 C3-DAPI BF C4-FACTIN 7.5uM U73122 treatment DMSO media ctrl.lif - ctrl media/203:0175-0725-0549:c:5/5 z:35/90 - ctrl media/203	51.39	43.23	0.749235	1.13435
220120 C1-PARD6B C2-GATA3 C3-DAPI BF C4-FACTIN 7.5uM U73122 treatment DMSO media ctrl.lif - ctrl media/203:0175-0713-0574:c:5/5 z:35/90 - ctrl media/203	59.18	31.73
220120 C1-PARD6B C2-GATA3 C3-DAPI BF C4-FACTIN 7.5uM U73122 treatment DMSO media ctrl.lif - ctrl media/203:0175-0654-0533:c:5/5 z:35/90 - ctrl media/203	68.59	38.11
220120 C1-PARD6B C2-GATA3 C3-DAPI BF C4-FACTIN 7.5uM U73122 treatment DMSO media ctrl.lif - ctrl media/203:0175-0445-0640:c:5/5 z:35/90 - ctrl media/203	34.15	45.36	1.297	1.20478
220120 C1-PARD6B C2-GATA3 C3-DAPI BF C4-FACTIN 7.5uM U73122 treatment DMSO media ctrl.lif - ctrl media/203:0175-0486-0638:c:5/5 z:35/90 - ctrl media/203	39.5	51.85
220120 C1-PARD6B C2-GATA3 C3-DAPI BF C4-FACTIN 7.5uM U73122 treatment DMSO media ctrl.lif - ctrl media/203:0175-0416-0549:c:5/5 z:35/90 - ctrl media/203	26.33	37.65
220120 C1-PARD6B C2-GATA3 C3-DAPI BF C4-FACTIN 7.5uM U73122 treatment DMSO media ctrl.lif - ctrl media/203:0145-0351-0577:c:5/5 z:29/90 - ctrl media/203	45.56	40	1.25406	1.32714
220120 C1-PARD6B C2-GATA3 C3-DAPI BF C4-FACTIN 7.5uM U73122 treatment DMSO media ctrl.lif - ctrl media/203:0145-0372-0525:c:5/5 z:29/90 - ctrl media/203	31.52	31.01
220120 C1-PARD6B C2-GATA3 C3-DAPI BF C4-FACTIN 7.5uM U73122 treatment DMSO media ctrl.lif - ctrl media/203:0145-0414-0577:c:5/5 z:29/90 - ctrl media/203	36.33	30.14
220120 C1-PARD6B C2-GATA3 C3-DAPI BF C4-FACTIN 7.5uM U73122 treatment DMSO media ctrl.lif - ctrl media/203:0145-0459-0654:c:5/5 z:29/90 - ctrl media/203	33.89	34.84	0.745655	1.10744
220120 C1-PARD6B C2-GATA3 C3-DAPI BF C4-FACTIN 7.5uM U73122 treatment DMSO media ctrl.lif - ctrl media/203:0145-0502-0646:c:5/5 z:29/90 - ctrl media/203	42.38	30.32
220120 C1-PARD6B C2-GATA3 C3-DAPI BF C4-FACTIN 7.5uM U73122 treatment DMSO media ctrl.lif - ctrl media/203:0145-0553-0635:c:5/5 z:29/90 - ctrl media/203	45.45	31.46
220120 C1-PARD6B C2-GATA3 C3-DAPI BF C4-FACTIN 7.5uM U73122 treatment DMSO media ctrl.lif - ctrl media/203:0095-0687-0451:c:5/5 z:18/90 - ctrl media/203	67.32	33.97	0.713589	1.07262
220120 C1-PARD6B C2-GATA3 C3-DAPI BF C4-FACTIN 7.5uM U73122 treatment DMSO media ctrl.lif - ctrl media/203:0095-0706-0478:c:5/5 z:18/90 - ctrl media/203	10.39	32.77
220120 C1-PARD6B C2-GATA3 C3-DAPI BF C4-FACTIN 7.5uM U73122 treatment DMSO media ctrl.lif - ctrl media/203:0095-0618-0401:c:5/5 z:18/90 - ctrl media/203	94.34	31.67
220120 C1-PARD6B C2-GATA3 C3-DAPI BF C4-FACTIN 7.5uM U73122 treatment DMSO media ctrl.lif - ctrl media/203:0095-0517-0306:c:5/5 z:18/90 - ctrl media/203	61.63		1.08733
220120 C1-PARD6B C2-GATA3 C3-DAPI BF C4-FACTIN 7.5uM U73122 treatment DMSO media ctrl.lif - ctrl media/203:0095-0499-0320:c:5/5 z:18/90 - ctrl media/203	37.55
220120 C1-PARD6B C2-GATA3 C3-DAPI BF C4-FACTIN 7.5uM U73122 treatment DMSO media ctrl.lif - ctrl media/203:0095-0419-0402:c:5/5 z:18/90 - ctrl media/203	56.68
Embryo 135
190613 Media only DMSO inhibitor 5uM C1Factin C2Gata3 C3Pard6b C4 DAPI C5BF.lif - media only/135:0191-0444-0338:c:1/5 z:39/78 - media only/135	97.74	45.26	1.72777	1.21798	1.809	0.809843
190613 Media only DMSO inhibitor 5uM C1Factin C2Gata3 C3Pard6b C4 DAPI C5BF.lif - media only/135:0191-0420-0300:c:1/5 z:39/78 - media only/135	128.06	35.35
190613 Media only DMSO inhibitor 5uM C1Factin C2Gata3 C3Pard6b C4 DAPI C5BF.lif - media only/135:0191-0457-0436:c:1/5 z:39/78 - media only/135	56.57	37.16
190613 Media only DMSO inhibitor 5uM C1Factin C2Gata3 C3Pard6b C4 DAPI C5BF.lif - media only/135:0191-0286-0668:c:1/5 z:39/78 - media only/135	140.24	53.89	2.54334	1.26058
190613 Media only DMSO inhibitor 5uM C1Factin C2Gata3 C3Pard6b C4 DAPI C5BF.lif - media only/135:0191-0322-0592:c:1/5 z:39/78 - media only/135	72.48	44.26
190613 Media only DMSO inhibitor 5uM C1Factin C2Gata3 C3Pard6b C4 DAPI C5BF.lif - media only/135:0191-0467-0672:c:1/5 z:39/78 - media only/135	55.14	42.75
190613 Media only DMSO inhibitor 5uM C1Factin C2Gata3 C3Pard6b C4 DAPI C5BF.lif - media only/135:0166-0542-0894:c:1/5 z:32/78 - media only/135	148.96	21.32	1.93731	0.476105
190613 Media only DMSO inhibitor 5uM C1Factin C2Gata3 C3Pard6b C4 DAPI C5BF.lif - media only/135:0166-0596-0803:c:1/5 z:32/78 - media only/135	91.34	46.92
190613 Media only DMSO inhibitor 5uM C1Factin C2Gata3 C3Pard6b C4 DAPI C5BF.lif - media only/135:0166-0618-0706:c:1/5 z:32/78 - media only/135	76.89	44.78
190613 Media only DMSO inhibitor 5uM C1Factin C2Gata3 C3Pard6b C4 DAPI C5BF.lif - media only/135:0191-0783-0700:c:1/5 z:39/78 - media only/135	114.36	33.92	1.5103	0.743371
190613 Media only DMSO inhibitor 5uM C1Factin C2Gata3 C3Pard6b C4 DAPI C5BF.lif - media only/135:0191-0758-0668:c:1/5 z:39/78 - media only/135	83.72	56.48
190613 Media only DMSO inhibitor 5uM C1Factin C2Gata3 C3Pard6b C4 DAPI C5BF.lif - media only/135:0191-0763-0538:c:1/5 z:39/78 - media only/135	75.72	45.63
190613 Media only DMSO inhibitor 5uM C1Factin C2Gata3 C3Pard6b C4 DAPI C5BF.lif - media only/135:0191-0856-0463:c:1/5 z:39/78 - media only/135	101.66	16.27	1.32629	0.351176
190613 Media only DMSO inhibitor 5uM C1Factin C2Gata3 C3Pard6b C4 DAPI C5BF.lif - media only/135:0191-0817-0431:c:1/5 z:39/78 - media only/135	115.59	56.9
190613 Media only DMSO inhibitor 5uM C1Factin C2Gata3 C3Pard6b C4 DAPI C5BF.lif - media only/135:0191-0709-0492:c:1/5 z:39/78 - media only/135	76.65	46.33
Embryo 201
220120 C1-PARD6B C2-GATA3 C3-DAPI BF C4-FACTIN 7.5uM U73122 treatment DMSO media ctrl.lif - ctrl media/201:0185-0329-0554:c:5/5 z:37/90 - ctrl media/201	65.14	25.22	0.883015	1.17961	0.750267	1.19253
220120 C1-PARD6B C2-GATA3 C3-DAPI BF C4-FACTIN 7.5uM U73122 treatment DMSO media ctrl.lif - ctrl media/201:0185-0363-0584:c:5/5 z:37/90 - ctrl media/201	61.05	24.31
220120 C1-PARD6B C2-GATA3 C3-DAPI BF C4-FACTIN 7.5uM U73122 treatment DMSO media ctrl.lif - ctrl media/201:0185-0430-0609:c:5/5 z:37/90 - ctrl media/201	73.77	21.38
220120 C1-PARD6B C2-GATA3 C3-DAPI BF C4-FACTIN 7.5uM U73122 treatment DMSO media ctrl.lif - ctrl media/201:0185-0419-0691:c:5/5 z:37/90 - ctrl media/201	63.02	24.31	0.863761	1.22099
220120 C1-PARD6B C2-GATA3 C3-DAPI BF C4-FACTIN 7.5uM U73122 treatment DMSO media ctrl.lif - ctrl media/201:0185-0492-0677:c:5/5 z:37/90 - ctrl media/201	64.86	22.82
220120 C1-PARD6B C2-GATA3 C3-DAPI BF C4-FACTIN 7.5uM U73122 treatment DMSO media ctrl.lif - ctrl media/201:0185-0429-0612:c:5/5 z:37/90 - ctrl media/201	72.96	19.91
220120 C1-PARD6B C2-GATA3 C3-DAPI BF C4-FACTIN 7.5uM U73122 treatment DMSO media ctrl.lif - ctrl media/201:0185-0655-0544:c:5/5 z:37/90 - ctrl media/201	52.51	33.13	0.662838	1.17858
220120 C1-PARD6B C2-GATA3 C3-DAPI BF C4-FACTIN 7.5uM U73122 treatment DMSO media ctrl.lif - ctrl media/201:0185-0637-0537:c:5/5 z:37/90 - ctrl media/201	52.77	26.58
220120 C1-PARD6B C2-GATA3 C3-DAPI BF C4-FACTIN 7.5uM U73122 treatment DMSO media ctrl.lif - ctrl media/201:0185-0563-0506:c:5/5 z:37/90 - ctrl media/201	79.22	28.11
220120 C1-PARD6B C2-GATA3 C3-DAPI BF C4-FACTIN 7.5uM U73122 treatment DMSO media ctrl.lif - ctrl media/201:0115-0540-0419:c:5/5 z:23/90 - ctrl media/201	74.15	26.57	0.736199	1.19095
220120 C1-PARD6B C2-GATA3 C3-DAPI BF C4-FACTIN 7.5uM U73122 treatment DMSO media ctrl.lif - ctrl media/201:0115-0511-0437:c:5/5 z:23/90 - ctrl media/201	83.13	28.58
220120 C1-PARD6B C2-GATA3 C3-DAPI BF C4-FACTIN 7.5uM U73122 treatment DMSO media ctrl.lif - ctrl media/201:0115-0433-0523:c:5/5 z:23/90 - ctrl media/201	100.72	22.31
220120 C1-PARD6B C2-GATA3 C3-DAPI BF C4-FACTIN 7.5uM U73122 treatment DMSO media ctrl.lif - ctrl media/201:0210-0380-0343:c:5/5 z:40/90 - ctrl media/201	45.1		0.841732
220120 C1-PARD6B C2-GATA3 C3-DAPI BF C4-FACTIN 7.5uM U73122 treatment DMSO media ctrl.lif - ctrl media/201:0210-0393-0356:c:5/5 z:40/90 - ctrl media/201	49.15
220120 C1-PARD6B C2-GATA3 C3-DAPI BF C4-FACTIN 7.5uM U73122 treatment DMSO media ctrl.lif - ctrl media/201:0210-0415-0388:c:5/5 z:40/90 - ctrl media/201	53.58
220120 C1-PARD6B C2-GATA3 C3-DAPI BF C4-FACTIN 7.5uM U73122 treatment DMSO media ctrl.lif - ctrl media/201:0210-0586-0350:c:5/5 z:40/90 - ctrl media/201	28.52		0.514059
220120 C1-PARD6B C2-GATA3 C3-DAPI BF C4-FACTIN 7.5uM U73122 treatment DMSO media ctrl.lif - ctrl media/201:0210-0580-0380:c:5/5 z:40/90 - ctrl media/201	47.66
220120 C1-PARD6B C2-GATA3 C3-DAPI BF C4-FACTIN 7.5uM U73122 treatment DMSO media ctrl.lif - ctrl media/201:0210-0536-0397:c:5/5 z:40/90 - ctrl media/201	55.48

## Sheet: Figure 2 Supplement 2b
Sample Name	Genotype	Condition	Source	GAPDH	PLCE1(b)	delct	average delta ct	average delt ct	delta delta ct	fold change	Average fold change	Stdev	Stderror	pvalue	PLCB1	delct	average delta ct	average delt ct control	delta delta ct	fold change	Average fold change	Stdev	Stderror	pvalue
N1	3PN	Control siRNA	IVI-RMA New Jersey	18.663	20.369	1.706	1.1915	1.56934	-0.377842	1.2994	1.51401	1.85212	0.436548	0.0571991	23.196	4.533	4.5505	6.11305	-1.56255	2.95376	2.6273	2.99813	0.706665	0.00254141
				18.663	19.34	0.677									23.231	4.568
N2	3PN	Control siRNA	IVI-RMA New Jersey	17.839	19.479	1.64	1.6065		0.0371578	0.974573					22.785	4.946	10.697		4.58395	0.041696
				17.755	19.328	1.573									34.203	16.448
N3	3PN	Control siRNA	IVI-RMA New Jersey	18.681	19.724	1.043	1.366		-0.203341	1.15136					24.405	5.724	5.4555		-0.657552	1.5774
				18.091	19.78	1.689									23.278	5.187
N4	3PN	Control siRNA	IVI-RMA New Jersey	17.075	19.769	2.694	2.7		1.13066	0.456708					23.859	6.784	6.245		0.131946	0.912599
				16.916	19.622	2.706									22.622	5.706
N5	1PN	Control siRNA	IVI-RMA New Jersey	16.043	20.9	4.857	4.9575		3.38816	0.0955131					23.979	7.936	7.8325		1.71945	0.303665
				15.922	20.98	5.058									23.651	7.729
N6	1PN	Control siRNA	IVI-RMA New Jersey	17.756	21.22	3.464	3.74		2.17066	0.22211					23.915	6.159	6.2975		0.184447	0.879986
				17.704	21.72	4.016									24.14	6.436
N7	1PN	Control siRNA	IVI-RMA New Jersey	17.698	19.287	1.589	1.048		-0.521342	1.43529					32.124	14.426	15.2865		9.17345	0.00173188
				17.874	18.381	0.507									34.021	16.147
N8	1PN	Control siRNA	IVI-RMA New Jersey	17.097	18.697	1.6	2.1495		0.580158	0.668891					22.255	5.158	5.3085		-0.804553	1.7466
				16.635	19.334	2.699									22.094	5.459
N9	1PN	Control siRNA	IVI-RMA New Jersey	19.178	19.021	-0.157	-0.3955		-1.96484	3.9037					24.839	5.661	5.577		-0.536052	1.45
				19.371	18.737	-0.634001									24.864	5.493
N10	1PN	Control siRNA	IVI-RMA New Jersey	16.826	19.852	3.026	2.805		1.23566	0.424649					20.93	4.104	3.9675		-2.14555	4.42462
				16.839	19.423	2.584									20.67	3.831
N11	1PN	Control siRNA	IVI-RMA New Jersey	18.245	18.842	0.596998	0.569999		-0.999343	1.99909					21.04	2.795	2.871		-3.24205	9.46139
				18.166	18.709	0.542999									21.113	2.947
N12	1PN	Control siRNA	IVI-RMA New Jersey	17.415	20.39	2.975	2.7085		1.13916	0.454025					34.572	17.157	15.636		9.52295	0.00135928
				17.576	20.018	2.442									31.691	14.115
N13	3PN	Control siRNA	IVI-RMA New Jersey	19.181	18.008	-1.173	-1.3675		-2.93684	7.65733					22.42	3.239	3.364		-2.74905	6.72276
				19.568	18.006	-1.562									23.057	3.489
N14	3PN	Control siRNA	IVI-RMA New Jersey	18.316	20.156	1.84	2.096		0.526659	0.694161					24.001	5.685	5.686		-0.427053	1.34448
				18.248	20.6	2.352									23.935	5.687
N15	3PN	Control siRNA	IVI-RMA New Jersey	19.411	19.329	-0.0819988	-0.1005		-1.66984	3.1818					23.009	3.598	3.5645		-2.54855	5.85047
				19.454	19.335	-0.119001									22.985	3.531
N16	1PN	Control siRNA	IVI-RMA New Jersey	19.307	19.051	-0.255999	-0.0194988		-1.58884	3.00808					22.046	2.739	2.9685		-3.14455	8.8431
				18.946	19.163	0.217001									22.144	3.198
N17	3PN	Control siRNA	IVI-RMA New Jersey	17.659	20.023	2.364	2.4025		0.833158	0.561299					23.756	6.097	5.8865		-0.226552	1.17004
				17.664	20.105	2.441									23.34	5.676
N18	3PN	Control siRNA	IVI-RMA New Jersey	17.045	19.331	2.286	2.3595		0.790157	0.578281					21.938	4.893	4.954		-1.15905	2.23311
				16.947	19.38	2.433									21.962	5.015
P1	3PN	PLCB1+PLCE1 siRNA	IVI-RMA New Jersey	16.986	21.375	4.389	4.383		2.81366	0.142234	0.430767	0.858678	0.258901		24.18	7.194	7.245		1.13195	0.456299	0.246609	0.309972	0.0934601
				17.183	21.56	4.377									24.479	7.296
P2	1PN	PLCB1+PLCE1 siRNA	IVI-RMA New Jersey	19.519	19.337	-0.181999	0.0325003		-1.53684	2.90159					25.311	5.792	6.0645		-0.0485517	1.03423
				19.001	19.248	0.247									25.338	6.337
P3	1PN	PLCB1+PLCE1 siRNA	IVI-RMA New Jersey	17.289	23.804	6.515	6.298		4.72866	0.0377166					24.938	7.649	7.65		1.53695	0.344614
				17.451	23.532	6.081									25.102	7.651
P4	3PN	PLCB1+PLCE1 siRNA	IVI-RMA New Jersey	17.061	20.059	2.998	2.7945		1.22516	0.427751					25.205	8.144	7.9725		1.85945	0.275582
				17.405	19.996	2.591									25.206	7.801
P5	3PN	PLCB1+PLCE1 siRNA	IVI-RMA New Jersey	17.9	22.554	4.654	4.442		2.87266	0.136535					33.582	15.682	15.4225		9.30945	0.00157607
				18.211	22.441	4.23									33.374	15.163
P6	3PN	PLCB1+PLCE1 siRNA	IVI-RMA New Jersey	17.474	22.156	4.682	4.755		3.18566	0.109906					32.823	15.349	16.779		10.6659	0.000615502
				17.302	22.13	4.828									35.511	18.209
P7	1PN	PLCB1+PLCE1 siRNA	IVI-RMA New Jersey	17.423	20.653	3.23	3.5555		1.98616	0.25241					26.364	8.941	8.8785		2.76545	0.147068
				17.304	21.185	3.881									26.12	8.816
P8	1PN	PLCB1+PLCE1 siRNA	IVI-RMA New Jersey	14.991	20.258	5.267	5.4005		3.83116	0.0702597					32.606	17.615	18.6075		12.4944	0.000173299
				15.004	20.538	5.534									34.604	19.6
P9	1PN	PLCB1+PLCE1 siRNA	IVI-RMA New Jersey	17.027	20.913	3.886	3.649		2.07966	0.236571					24.239	7.212	7.2605		1.14745	0.451423
				16.989	20.401	3.412									24.298	7.309
P10	1PN	PLCB1+PLCE1 siRNA	IVI-RMA New Jersey	17.229	20.418	3.189	2.809		1.23966	0.423473					33.129	15.9	15.909		9.79595	0.00112493
				17.235	19.664	2.429									33.153	15.918
P11	3PN	PLCB1+PLCE1 siRNA	IVI-RMA New Jersey	18.881	19.699	0.817999	0.916999		-0.652343	1.57172					28.885	10.004	9.908		3.79495	0.0720455
				18.683	19.699	1.016									28.495	9.812
																PLCE1	PLCB1	Stderror	Stderror
															All Star Negative	1.51401	2.6273	0.436548	0.706665
															SiRNA injections	0.430767	0.246609	0.258901	0.0934601

## Sheet: Figure 2 Supplement 2c and d
ANALYSIS OF COMPACTION
	Compacted	Non-compacted	Dead/arrested			Compacted	Non-compacted
Control	40	21	5		Control siRNA	9	5
DMSO 5uM	11	10	2		PLC siRNA	7	6
PLCi 5uM	16	12	3
DMSO 7.5uM	10	13	4
PLCi 7.5uM	7	16	4
