# Supplementary material for: Human embryo polarization requires PLC signaling to mediate trophectoderm specification
Source: eLife. 2021 Sep 27;10:e65068. doi: 10.7554/eLife.65068 (PMC8514238; doi:10.7554/eLife.65068)
Supplement: Figure 3—source data 1. — This file contains the source data used to make the graphs presented in Figure 3. GraphPad Prism was utilized to visually represent the quantitative data. [file elife-65068-fig3-data1.xlsx]

## Sheet: Figure 3b
DYNAMICS OF GATA3 EXPRESSION
Embryo No.	No. of GATA3 positive cell number	condition
2	1	24h
4	22	24h
6	19	24h
7	7	24h
8	16	24h
11	0	24h
13	4	24h
16	12	24h
17	14	24h
19	23	24h
20	0	24h
77	5	24h
79	4	24h
80	7	24h
81	0	24h
84	0	24h
107	21	24h
108	0	24h
109	0	24h
110	8	24h
111	10	24h
112	20	24h
113	28	24h
114	0	24h
115	20	24h
116	0	24h
117	5	24h
118	21	24h
131	0	24h
133	0	24h
134	12	24h
135	0	24h
136	0	24h
22	0	2h
23	0	2h
25	0	2h
27	0	2h
28	0	2h
29	0	2h
30	0	2h
32	0	2h
62	0	2h
64	0	2h
60	0	2h
59	0	2h
57	0	2h
56	0	2h
55	0	2h
54	0	2h
53	0	2h
1	0	9h
5	0	9h
10	0	9h
2	0	9h
5	0	9h
52	0	9h
51	0	9h
50	0	9h
49	0	9h
48	0	9h
47	0	9h
45	0	9h
44	0	9h
43	0	9h
41	0	9h
38	0	9h
36	0	9h
35	0	9h
34	0	9h
33	0	9h

## Sheet: Figure 3c
QUANTIFICATION OF GATA3 EXPRESSION
GATA3 nuclear signal intensity at different developmental stages and in polarised and non-polarised cells
2h	9h	24h-Polarized cells	24h-Non-polarized cells
0.797585	1.10124
		3.10352	5.61686
0.818059	0.716238
		2.81783	3.80288
1.17965	0.808048
		3.21421	3.44965
1.10607	0.704204
		2.87745	3.22457
1.01471	0.709
			4.32584
	0.648238
1.15679			3.07339
	0.777778
1.03701			6.05767
	1.05113
1.23544			5.76876
0.858006	0.500127
		3.50879	4.02714
0.875351	0.642704
		2.48359	4.88452
	0.661913
1.11016			3.96317
	0.573847
0.901605			6.99641
	0.949825
1.06894			6.55488
	0.576606
0.947842			5.54874
	0.71984
			4.262
1.10703
	1.24603		6.6617
1.08333
	1.89146
0.829603		2.10794	5.32269
	1.05403
1.00462		2.45481	3.80809
	0.831009
			2.09705
1.26866	0.70235
			4.1041
0.934206	0.801555
			6.64955
1.02291
	0.733148
		2.11614	3.40679
	0.875151
		1.22244	2.4678
	0.884696
		1.56516	2.48434
	0.833193
		1.66667	3.14229
	0.6769
		2.25919	2.86278
	0.654304
		0.557505	0.85054
	0.762664
		0.884525	0.881048
	0.708216
		0.38689	0.614232
	0.913177
		0.940979	0.70422
	0.732131
			0.563273
	0.898393
			0.987911

## Sheet: Figure 3e
ANALYSIS OF GATA3 IN RNAi TREATED EMBRYOS
Normalised GATA3 signal intensity with PLC siRNA treatments
GATA3 - ctrl siRNA	GATA3 - PLC siRNA
1.86607	3.93898
1.97109	1.92432
2.00306	1.60614
1.7665	1.89094
1.89275	1.71906
1.54647	2.9566
2.26388	1.91552
1.6568	2.53871
1.78557	1.82785
2.07361	2.54709
2.32815	2.22915
1.99584	6.41441
7.45836	2.62436
3.30335	5.27443
4.04059	2.44471
3.09443	2.32048
3.13685	1.48745
3.12678	1.06844
4.63186	0.817349
1.69361	1.21356
1.98899	1.15125
1.5369	1.10957
1.22522
	1.71346
2.88821	1.06008
4.50112	1.06844
3.18224	0.987141
2.65983	1.01065
5.34036	0.96418
1.50312	1.52281
1.30764
	0.740741
0.943396
	0.834393
	1.48222
	1.24589
	0.744843
	0.855034
	0.88596
	0.860191
	0.687033
	0.549098
	1.06161
	1.22241
	1.23742
	1.04695
	0.947502

## Sheet: Figure 3f
ANALYSIS OF GATA3 LEVELS IN THE PLCi EXPERIMENT
GATA3 expression in polarized or non-polarized cells in PLC siRNA treatment
Ctrl siRNA - Polarised	Ctrl siRNA - Non-polarised	PLC siRNA - Polarised	PLC siRNA - Non-polarised
1.86607	1.30764		1.06844
		0.740741
1.97109	0.943396		0.817349
		0.834393
2.00306			1.21356
		1.48222
1.7665			1.15125
		1.24589
1.89275			1.10957
		0.744843
1.54647
		0.855034	1.71346
2.26388
		0.88596	1.06008
1.6568
		0.860191	1.06844
1.78557
			0.987141
2.07361		0.687033
			1.01065
2.32815		0.549098
			0.96418
1.99584
			1.52281
		1.06161
7.45836		1.22241	0.947502
3.30335		1.23742
4.04059		1.04695
3.09443
3.13685
		3.93898
3.12678
		1.92432
4.63186
		1.60614
1.69361
		1.89094
1.98899
		1.71906
1.5369
		2.9566
1.22522
		1.91552
2.88821		2.53871
4.50112		1.82785
3.18224		2.54709
2.65983		2.22915
5.34036		6.41441
1.50312		2.62436
		5.27443
1.59686
		2.44471
0.827048
		2.32048
1.10509
		1.48745
1.25797

## Sheet: Figure 3 Supplement 1a
ANALYSIS OF GATA3 EXPRESSION
GATA3 expression in polarized or non-polarized cells
EXP Number	Embryo ID	Total cell number	Outer Pard6+ cell number	Inner cell number	Total GATA3+ No.	Outer GATA3+	Inner GATA3+
1	4	28	21	6	22	16	6
1	6	19	14	4	19	15	4
1	7	15	5	1	7	6	1
1	8	16	2	1	16	15	1
1	13	17	9	2	4	3	1
1	16	19	11	3	12	10	2
1	17	15	14	1	14	13	1
1	19	23	16	4	23	19	4
1	20	14	0	2	0	0	0
4	107	26	20	4	21	18	3
4	110	17	8	2	8	8	0
4	111	23	21	3	10	8	2
4	112	21	17	2	20	19	1
4	113	33	15	3	28	25	3
4	115	35	23	3	20	19	1
4	118	24	20	2	21	20	1
5	133	16	4	1	0	0	0
5	134	24	17	4	12	11	1
9	204	51		12	51	39	12
9	206	28		2	21	19	2
9	208	18		2	1	1	0
9	209	4		1	15	15	0
9	210	12		1	7	6	1
10	234	13		1	8	8	0
10	239	16		1	0	0	0
Sum		527		68		313	47

## Sheet: Figure 3 Supplement 1c
QUANTIFICATION OF YAP LOCALIZATION
Polarized cell	Polarized cell Yap signal intensity	Polarized cell Yap N/C ratio	Unpolarized cell Yap signal intensity	Unpolarized cell Yap N/C ratio
Embryo 260
nuclear	37.97	1.62057	33.11	1.60884
cytoplasm	23.43		20.58
2020AUG5 scan YapwithPARD6B GATA3withaPKC on Sp8.lif - DAPI BF YAP PARD6B/260:0099-0319-0390:c:3/4 z:25/90 - DAPI BF YAP PARD6B/260	35.11	1.77413
2020AUG5 scan YapwithPARD6B GATA3withaPKC on Sp8.lif - DAPI BF YAP PARD6B/260:0099-0291-0468:c:3/4 z:25/90 - DAPI BF YAP PARD6B/260	19.79
2020AUG5 scan YapwithPARD6B GATA3withaPKC on Sp8.lif - DAPI BF YAP PARD6B/260:0099-0492-0301:c:3/4 z:25/90 - DAPI BF YAP PARD6B/260	33.76	1.69478
2020AUG5 scan YapwithPARD6B GATA3withaPKC on Sp8.lif - DAPI BF YAP PARD6B/260:0099-0577-0331:c:3/4 z:25/90 - DAPI BF YAP PARD6B/260	19.92
2020AUG5 scan YapwithPARD6B GATA3withaPKC on Sp8.lif - DAPI BF YAP PARD6B/260:0123-0639-0523:c:3/4 z:31/90 - DAPI BF YAP PARD6B/260	21.8	1.08458
2020AUG5 scan YapwithPARD6B GATA3withaPKC on Sp8.lif - DAPI BF YAP PARD6B/260:0123-0687-0461:c:3/4 z:31/90 - DAPI BF YAP PARD6B/260	20.1
2020AUG5 scan YapwithPARD6B GATA3withaPKC on Sp8.lif - DAPI BF YAP PARD6B/260:0159-0625-0347:c:3/4 z:40/90 - DAPI BF YAP PARD6B/260	22.65	1.76539
2020AUG5 scan YapwithPARD6B GATA3withaPKC on Sp8.lif - DAPI BF YAP PARD6B/260:0159-0571-0390:c:3/4 z:40/90 - DAPI BF YAP PARD6B/260	12.83
2020AUG5 scan YapwithPARD6B GATA3withaPKC on Sp8.lif - DAPI BF YAP PARD6B/260:0223-0377-0380:c:3/4 z:56/90 - DAPI BF YAP PARD6B/260	14.21	1.64658
2020AUG5 scan YapwithPARD6B GATA3withaPKC on Sp8.lif - DAPI BF YAP PARD6B/260:0223-0352-0449:c:3/4 z:56/90 - DAPI BF YAP PARD6B/260	8.63
2020AUG5 scan YapwithPARD6B GATA3withaPKC on Sp8.lif - DAPI BF YAP PARD6B/260:0235-0485-0704:c:3/4 z:59/90 - DAPI BF YAP PARD6B/260	10.14	1.27547
2020AUG5 scan YapwithPARD6B GATA3withaPKC on Sp8.lif - DAPI BF YAP PARD6B/260:0235-0444-0749:c:3/4 z:59/90 - DAPI BF YAP PARD6B/260	7.95
Embryo 259
2020AUG5 scan YapwithPARD6B GATA3withaPKC on Sp8.lif - DAPI BF YAP PARD6B/259:0067-0488-0314:c:3/4 z:17/58 - DAPI BF YAP PARD6B/259			22.86	0.810638
2020AUG5 scan YapwithPARD6B GATA3withaPKC on Sp8.lif - DAPI BF YAP PARD6B/259:0067-0642-0287:c:3/4 z:17/58 - DAPI BF YAP PARD6B/259			28.2
2020AUG5 scan YapwithPARD6B GATA3withaPKC on Sp8.lif - DAPI BF YAP PARD6B/259:0147-0450-0676:c:3/4 z:37/58 - DAPI BF YAP PARD6B/259			12.71	0.815789
2020AUG5 scan YapwithPARD6B GATA3withaPKC on Sp8.lif - DAPI BF YAP PARD6B/259:0147-0537-0718:c:3/4 z:37/58 - DAPI BF YAP PARD6B/259			15.58
2020AUG5 scan YapwithPARD6B GATA3withaPKC on Sp8.lif - DAPI BF YAP PARD6B/259:0147-0347-0611:c:3/4 z:37/58 - DAPI BF YAP PARD6B/259			13.26	1.14114
2020AUG5 scan YapwithPARD6B GATA3withaPKC on Sp8.lif - DAPI BF YAP PARD6B/259:0147-0415-0530:c:3/4 z:37/58 - DAPI BF YAP PARD6B/259			11.62
Embryo 258
2020AUG5 scan YapwithPARD6B GATA3withaPKC on Sp8.lif - DAPI BF YAP PARD6B/258:0051-0418-0547:c:3/4 z:13/64 - DAPI BF YAP PARD6B/258	36.15	1.40334	8.56	0.988453
2020AUG5 scan YapwithPARD6B GATA3withaPKC on Sp8.lif - DAPI BF YAP PARD6B/258:0051-0388-0596:c:3/4 z:13/64 - DAPI BF YAP PARD6B/258	25.76		8.66
2020AUG5 scan YapwithPARD6B GATA3withaPKC on Sp8.lif - DAPI BF YAP PARD6B/258:0051-0455-0700:c:3/4 z:13/64 - DAPI BF YAP PARD6B/258	34.51	1.29688	9.36	0.996805
2020AUG5 scan YapwithPARD6B GATA3withaPKC on Sp8.lif - DAPI BF YAP PARD6B/258:0051-0414-0707:c:3/4 z:13/64 - DAPI BF YAP PARD6B/258	26.61		9.39
2020AUG5 scan YapwithPARD6B GATA3withaPKC on Sp8.lif - DAPI BF YAP PARD6B/258:0091-0347-0384:c:3/4 z:23/64 - DAPI BF YAP PARD6B/258	30.73	1.23265	20.1	1.11234
2020AUG5 scan YapwithPARD6B GATA3withaPKC on Sp8.lif - DAPI BF YAP PARD6B/258:0091-0279-0400:c:3/4 z:23/64 - DAPI BF YAP PARD6B/258	24.93		18.07
2020AUG5 scan YapwithPARD6B GATA3withaPKC on Sp8.lif - DAPI BF YAP PARD6B/258:0091-0517-0345:c:3/4 z:23/64 - DAPI BF YAP PARD6B/258	29.19	1.44077	14.02	0.990813
2020AUG5 scan YapwithPARD6B GATA3withaPKC on Sp8.lif - DAPI BF YAP PARD6B/258:0091-0445-0349:c:3/4 z:23/64 - DAPI BF YAP PARD6B/258	20.26		14.15
2020AUG5 scan YapwithPARD6B GATA3withaPKC on Sp8.lif - DAPI BF YAP PARD6B/258:0131-0271-0537:c:3/4 z:33/64 - DAPI BF YAP PARD6B/258	21.71	1.02502	16.32	1.02128
2020AUG5 scan YapwithPARD6B GATA3withaPKC on Sp8.lif - DAPI BF YAP PARD6B/258:0131-0191-0520:c:3/4 z:33/64 - DAPI BF YAP PARD6B/258	21.18		15.98
2020AUG5 scan YapwithPARD6B GATA3withaPKC on Sp8.lif - DAPI BF YAP PARD6B/258:0131-0260-0589:c:3/4 z:33/64 - DAPI BF YAP PARD6B/258	22.07	1.22884	22.32	0.930776
2020AUG5 scan YapwithPARD6B GATA3withaPKC on Sp8.lif - DAPI BF YAP PARD6B/258:0131-0241-0659:c:3/4 z:33/64 - DAPI BF YAP PARD6B/258	17.96		23.98
2020AUG5 scan YapwithPARD6B GATA3withaPKC on Sp8.lif - DAPI BF YAP PARD6B/258:0175-0754-0557:c:3/4 z:44/64 - DAPI BF YAP PARD6B/258	14.33	1.5148
2020AUG5 scan YapwithPARD6B GATA3withaPKC on Sp8.lif - DAPI BF YAP PARD6B/258:0175-0782-0623:c:3/4 z:44/64 - DAPI BF YAP PARD6B/258	9.46
2020AUG5 scan YapwithPARD6B GATA3withaPKC on Sp8.lif - DAPI BF YAP PARD6B/258:0175-0506-0316:c:3/4 z:44/64 - DAPI BF YAP PARD6B/258	14.91	1.37928
2020AUG5 scan YapwithPARD6B GATA3withaPKC on Sp8.lif - DAPI BF YAP PARD6B/258:0175-0452-0298:c:3/4 z:44/64 - DAPI BF YAP PARD6B/258	10.81
2020AUG5 scan YapwithPARD6B GATA3withaPKC on Sp8.lif - DAPI BF YAP PARD6B/258:0135-0708-0332:c:3/4 z:34/64 - DAPI BF YAP PARD6B/258	21.98	1.66012
2020AUG5 scan YapwithPARD6B GATA3withaPKC on Sp8.lif - DAPI BF YAP PARD6B/258:0135-0797-0424:c:3/4 z:34/64 - DAPI BF YAP PARD6B/258	13.24
2020AUG5 scan YapwithPARD6B GATA3withaPKC on Sp8.lif - DAPI BF YAP PARD6B/258:0063-0461-0718:c:3/4 z:16/64 - DAPI BF YAP PARD6B/258	34.65	1.46698
2020AUG5 scan YapwithPARD6B GATA3withaPKC on Sp8.lif - DAPI BF YAP PARD6B/258:0063-0543-0705:c:3/4 z:16/64 - DAPI BF YAP PARD6B/258	23.62
2020AUG5 scan YapwithPARD6B GATA3withaPKC on Sp8.lif - DAPI BF YAP PARD6B/258:0131-0385-0670:c:3/4 z:33/64 - DAPI BF YAP PARD6B/258	15.3	1.02068
2020AUG5 scan YapwithPARD6B GATA3withaPKC on Sp8.lif - DAPI BF YAP PARD6B/258:0131-0421-0602:c:3/4 z:33/64 - DAPI BF YAP PARD6B/258	14.99
2020AUG5 scan YapwithPARD6B GATA3withaPKC on Sp8.lif - DAPI BF YAP PARD6B/258:0159-0699-0747:c:3/4 z:40/64 - DAPI BF YAP PARD6B/258	13.67	1.09535
2020AUG5 scan YapwithPARD6B GATA3withaPKC on Sp8.lif - DAPI BF YAP PARD6B/258:0159-0720-0694:c:3/4 z:40/64 - DAPI BF YAP PARD6B/258	12.48
2020AUG5 scan YapwithPARD6B GATA3withaPKC on Sp8.lif - DAPI BF YAP PARD6B/258:0175-0746-0561:c:3/4 z:44/64 - DAPI BF YAP PARD6B/258	13.82	1.42035
2020AUG5 scan YapwithPARD6B GATA3withaPKC on Sp8.lif - DAPI BF YAP PARD6B/258:0175-0817-0596:c:3/4 z:44/64 - DAPI BF YAP PARD6B/258	9.73
Embryo 256
2020AUG5 scan YapwithPARD6B GATA3withaPKC on Sp8.lif - DAPI BF YAP PARD6B/256:0051-0607-0507:c:3/4 z:13/87 - DAPI BF YAP PARD6B/256	36.46	1.2838	22.61	0.908397
2020AUG5 scan YapwithPARD6B GATA3withaPKC on Sp8.lif - DAPI BF YAP PARD6B/256:0051-0545-0510:c:3/4 z:13/87 - DAPI BF YAP PARD6B/256	28.4		24.89
2020AUG5 scan YapwithPARD6B GATA3withaPKC on Sp8.lif - DAPI BF YAP PARD6B/256:0067-0678-0356:c:3/4 z:17/87 - DAPI BF YAP PARD6B/256	30.81	1.21156	22.04	1.02894
2020AUG5 scan YapwithPARD6B GATA3withaPKC on Sp8.lif - DAPI BF YAP PARD6B/256:0067-0715-0430:c:3/4 z:17/87 - DAPI BF YAP PARD6B/256	25.43		21.42
			25.94	1.05533
			24.58
			18.66	0.9785
			19.07
			17.75	1.14075
			15.56
			18.68	1.13487
			16.46

## Sheet: Figure 3 Supplement 1e
QUANTIFICATION OF GATA3 EXPRESSION
MEDIA CONTROL	intensity measurements	Nuclear ratio		DMSO 35mM	intensity measurements	Nuclear ratio		DMSO 53mM	intensity measurements	Nuclear ratio		U73122 5uM	intensity measurements	Nuclear ratio		U73122 5uM	intensity measurements	Nuclear ratio
Embryo 118				Embryo 124				Embryo 584				Embryo 105				Embryo 638
Nucleus	49.25	3.35948		190406 Ctrl DMSO Inhibitor C1 DAPI C2 BF C3 Factin C4 Gata3 C5 Pard6.lif - DMSO control/124:0119-0413-0394:c:4/5 z:24/61 - DMSO control/124	39.01	1.17042		191228 DMSO and U73122 7.5uM C1-Factin C2-GATA3 C3- DAPI BF C4-PARD6B.lif - dmso/584:0122-0534-0652:c:2/5 z:25/57 - dmso/584	9.98	0.788933		190406 Ctrl DMSO Inhibitor C1 DAPI C2 BF C3 Factin C4 Gata3 C5 Pard6.lif - Inhibitor/105:0159-0531-0699:c:4/5 z:32/61 - Inhibitor/105	30.12	1.21501		191228 DMSO and U73122 7.5uM C1-Factin C2-GATA3 C3- DAPI BF C4-PARD6B.lif - u73122/638:0142-0484-0743:c:2/5 z:32/59 - u73122/638	13.58	0.528199
Cytoplasm	14.66			190406 Ctrl DMSO Inhibitor C1 DAPI C2 BF C3 Factin C4 Gata3 C5 Pard6.lif - DMSO control/124:0119-0413-0347:c:4/5 z:24/61 - DMSO control/124	33.33			191228 DMSO and U73122 7.5uM C1-Factin C2-GATA3 C3- DAPI BF C4-PARD6B.lif - dmso/584:0122-0567-0579:c:2/5 z:25/57 - dmso/584	12.65			190406 Ctrl DMSO Inhibitor C1 DAPI C2 BF C3 Factin C4 Gata3 C5 Pard6.lif - Inhibitor/105:0159-0542-0717:c:4/5 z:32/61 - Inhibitor/105	24.79			191228 DMSO and U73122 7.5uM C1-Factin C2-GATA3 C3- DAPI BF C4-PARD6B.lif - u73122/638:0142-0496-0804:c:2/5 z:32/59 - u73122/638	25.71
190406 Ctrl DMSO Inhibitor C1 DAPI C2 BF C3 Factin C4 Gata3 C5 Pard6.lif - ctrl/rescan control/118 rescan:0194-0362-0283:c:4/5 z:40/61 - ctrl/rescan control/118 rescan	35.01	2.97957		190406 Ctrl DMSO Inhibitor C1 DAPI C2 BF C3 Factin C4 Gata3 C5 Pard6.lif - DMSO control/124:0119-0518-0385:c:4/5 z:24/61 - DMSO control/124	26	0.850507		191228 DMSO and U73122 7.5uM C1-Factin C2-GATA3 C3- DAPI BF C4-PARD6B.lif - dmso/584:0122-0291-0522:c:2/5 z:25/57 - dmso/584	16.76	0.803067		190406 Ctrl DMSO Inhibitor C1 DAPI C2 BF C3 Factin C4 Gata3 C5 Pard6.lif - Inhibitor/105:0159-0502-0422:c:4/5 z:32/61 - Inhibitor/105	16.96	0.642181		191228 DMSO and U73122 7.5uM C1-Factin C2-GATA3 C3- DAPI BF C4-PARD6B.lif - u73122/638:0117-0331-0677:c:2/5 z:24/59 - u73122/638	19.01	0.577285
190406 Ctrl DMSO Inhibitor C1 DAPI C2 BF C3 Factin C4 Gata3 C5 Pard6.lif - ctrl/rescan control/118 rescan:0194-0419-0247:c:4/5 z:40/61 - ctrl/rescan control/118 rescan	11.75			190406 Ctrl DMSO Inhibitor C1 DAPI C2 BF C3 Factin C4 Gata3 C5 Pard6.lif - DMSO control/124:0119-0520-0286:c:4/5 z:24/61 - DMSO control/124	30.57			191228 DMSO and U73122 7.5uM C1-Factin C2-GATA3 C3- DAPI BF C4-PARD6B.lif - dmso/584:0122-0347-0479:c:2/5 z:25/57 - dmso/584	20.87			190406 Ctrl DMSO Inhibitor C1 DAPI C2 BF C3 Factin C4 Gata3 C5 Pard6.lif - Inhibitor/105:0159-0419-0422:c:4/5 z:32/61 - Inhibitor/105	26.41			191228 DMSO and U73122 7.5uM C1-Factin C2-GATA3 C3- DAPI BF C4-PARD6B.lif - u73122/638:0117-0333-0734:c:2/5 z:24/59 - u73122/638	32.93
190406 Ctrl DMSO Inhibitor C1 DAPI C2 BF C3 Factin C4 Gata3 C5 Pard6.lif - ctrl/rescan control/118 rescan:0194-0445-0702:c:4/5 z:40/61 - ctrl/rescan control/118 rescan	23.58	1.96664		190406 Ctrl DMSO Inhibitor C1 DAPI C2 BF C3 Factin C4 Gata3 C5 Pard6.lif - DMSO control/124:0119-0633-0255:c:4/5 z:24/61 - DMSO control/124	30.77	1.05485		191228 DMSO and U73122 7.5uM C1-Factin C2-GATA3 C3- DAPI BF C4-PARD6B.lif - dmso/584:0082-0639-0455:c:2/5 z:17/57 - dmso/584	23.53	0.808036		190406 Ctrl DMSO Inhibitor C1 DAPI C2 BF C3 Factin C4 Gata3 C5 Pard6.lif - Inhibitor/105:0159-0620-0300:c:4/5 z:32/61 - Inhibitor/105	14.91	0.693488		191228 DMSO and U73122 7.5uM C1-Factin C2-GATA3 C3- DAPI BF C4-PARD6B.lif - u73122/638:0117-0668-0592:c:2/5 z:24/59 - u73122/638	18.47	0.902296
190406 Ctrl DMSO Inhibitor C1 DAPI C2 BF C3 Factin C4 Gata3 C5 Pard6.lif - ctrl/rescan control/118 rescan:0194-0367-0679:c:4/5 z:40/61 - ctrl/rescan control/118 rescan	11.99			190406 Ctrl DMSO Inhibitor C1 DAPI C2 BF C3 Factin C4 Gata3 C5 Pard6.lif - DMSO control/124:0119-0579-0246:c:4/5 z:24/61 - DMSO control/124	29.17			191228 DMSO and U73122 7.5uM C1-Factin C2-GATA3 C3- DAPI BF C4-PARD6B.lif - dmso/584:0082-0563-0358:c:2/5 z:17/57 - dmso/584	29.12			190406 Ctrl DMSO Inhibitor C1 DAPI C2 BF C3 Factin C4 Gata3 C5 Pard6.lif - Inhibitor/105:0159-0539-0272:c:4/5 z:32/61 - Inhibitor/105	21.5			191228 DMSO and U73122 7.5uM C1-Factin C2-GATA3 C3- DAPI BF C4-PARD6B.lif - u73122/638:0117-0628-0638:c:2/5 z:24/59 - u73122/638	20.47
190406 Ctrl DMSO Inhibitor C1 DAPI C2 BF C3 Factin C4 Gata3 C5 Pard6.lif - ctrl/rescan control/118 rescan:0179-0430-0599:c:4/5 z:36/61 - ctrl/rescan control/118 rescan	39.3	3.07512		190406 Ctrl DMSO Inhibitor C1 DAPI C2 BF C3 Factin C4 Gata3 C5 Pard6.lif - DMSO control/124:0159-0382-0678:c:4/5 z:32/61 - DMSO control/124	36.88	0.890821		191228 DMSO and U73122 7.5uM C1-Factin C2-GATA3 C3- DAPI BF C4-PARD6B.lif - dmso/584:0082-0416-0407:c:2/5 z:17/57 - dmso/584	22.22	1.08762		190406 Ctrl DMSO Inhibitor C1 DAPI C2 BF C3 Factin C4 Gata3 C5 Pard6.lif - Inhibitor/105:0104-0439-0395:c:4/5 z:19/61 - Inhibitor/105	21.56	0.782861		191228 DMSO and U73122 7.5uM C1-Factin C2-GATA3 C3- DAPI BF C4-PARD6B.lif - u73122/638:0082-0476-0461:c:2/5 z:17/59 - u73122/638	17.34	0.557019
190406 Ctrl DMSO Inhibitor C1 DAPI C2 BF C3 Factin C4 Gata3 C5 Pard6.lif - ctrl/rescan control/118 rescan:0179-0372-0549:c:4/5 z:36/61 - ctrl/rescan control/118 rescan	12.78			190406 Ctrl DMSO Inhibitor C1 DAPI C2 BF C3 Factin C4 Gata3 C5 Pard6.lif - DMSO control/124:0159-0384-0745:c:4/5 z:32/61 - DMSO control/124	41.4			191228 DMSO and U73122 7.5uM C1-Factin C2-GATA3 C3- DAPI BF C4-PARD6B.lif - dmso/584:0082-0436-0469:c:2/5 z:17/57 - dmso/584	20.43			190406 Ctrl DMSO Inhibitor C1 DAPI C2 BF C3 Factin C4 Gata3 C5 Pard6.lif - Inhibitor/105:0104-0513-0406:c:4/5 z:19/61 - Inhibitor/105	27.54			191228 DMSO and U73122 7.5uM C1-Factin C2-GATA3 C3- DAPI BF C4-PARD6B.lif - u73122/638:0082-0522-0425:c:2/5 z:17/59 - u73122/638	31.13
190406 Ctrl DMSO Inhibitor C1 DAPI C2 BF C3 Factin C4 Gata3 C5 Pard6.lif - ctrl/rescan control/118 rescan:0214-0338-0411:c:4/5 z:46/61 - ctrl/rescan control/118 rescan	18.73	1.74883		190406 Ctrl DMSO Inhibitor C1 DAPI C2 BF C3 Factin C4 Gata3 C5 Pard6.lif - DMSO control/124:0159-0413-0560:c:4/5 z:32/61 - DMSO control/124	32.56	1.54386		Embryo 633				190406 Ctrl DMSO Inhibitor C1 DAPI C2 BF C3 Factin C4 Gata3 C5 Pard6.lif - Inhibitor/105:0104-0553-0565:c:4/5 z:19/61 - Inhibitor/105	24.55	0.915362		191228 DMSO and U73122 7.5uM C1-Factin C2-GATA3 C3- DAPI BF C4-PARD6B.lif - u73122/638:0112-0424-0560:c:2/5 z:23/59 - u73122/638	13.49	0.738369
190406 Ctrl DMSO Inhibitor C1 DAPI C2 BF C3 Factin C4 Gata3 C5 Pard6.lif - ctrl/rescan control/118 rescan:0214-0295-0464:c:4/5 z:46/61 - ctrl/rescan control/118 rescan	10.71			190406 Ctrl DMSO Inhibitor C1 DAPI C2 BF C3 Factin C4 Gata3 C5 Pard6.lif - DMSO control/124:0159-0483-0573:c:4/5 z:32/61 - DMSO control/124	21.09			191228 DMSO and U73122 7.5uM C1-Factin C2-GATA3 C3- DAPI BF C4-PARD6B.lif - dmso/633:0137-0705-0430:c:2/5 z:28/63 - dmso/633	20.25	1.12563		190406 Ctrl DMSO Inhibitor C1 DAPI C2 BF C3 Factin C4 Gata3 C5 Pard6.lif - Inhibitor/105:0104-0630-0608:c:4/5 z:19/61 - Inhibitor/105	26.82			191228 DMSO and U73122 7.5uM C1-Factin C2-GATA3 C3- DAPI BF C4-PARD6B.lif - u73122/638:0112-0420-0488:c:2/5 z:23/59 - u73122/638	18.27
190406 Ctrl DMSO Inhibitor C1 DAPI C2 BF C3 Factin C4 Gata3 C5 Pard6.lif - ctrl/rescan control/118 rescan:0214-0504-0246:c:4/5 z:46/61 - ctrl/rescan control/118 rescan	30.13	3.4752		190406 Ctrl DMSO Inhibitor C1 DAPI C2 BF C3 Factin C4 Gata3 C5 Pard6.lif - DMSO control/124:0159-0598-0778:c:4/5 z:32/61 - DMSO control/124	30.01	0.924807		191228 DMSO and U73122 7.5uM C1-Factin C2-GATA3 C3- DAPI BF C4-PARD6B.lif - dmso/633:0137-0620-0472:c:2/5 z:28/63 - dmso/633	17.99			Embryo 104				Embryo 635
190406 Ctrl DMSO Inhibitor C1 DAPI C2 BF C3 Factin C4 Gata3 C5 Pard6.lif - ctrl/rescan control/118 rescan:0214-0581-0251:c:4/5 z:46/61 - ctrl/rescan control/118 rescan	8.67			190406 Ctrl DMSO Inhibitor C1 DAPI C2 BF C3 Factin C4 Gata3 C5 Pard6.lif - DMSO control/124:0159-0541-0803:c:4/5 z:32/61 - DMSO control/124	32.45			191228 DMSO and U73122 7.5uM C1-Factin C2-GATA3 C3- DAPI BF C4-PARD6B.lif - dmso/633:0137-0584-0257:c:2/5 z:28/63 - dmso/633	19.94	0.912168		190406 Ctrl DMSO Inhibitor C1 DAPI C2 BF C3 Factin C4 Gata3 C5 Pard6.lif - Inhibitor/104:0154-0766-0440:c:4/5 z:31/61 - Inhibitor/104	39.04	2.12752		191228 DMSO and U73122 7.5uM C1-Factin C2-GATA3 C3- DAPI BF C4-PARD6B.lif - u73122/635:0067-0528-0656:c:2/5 z:14/60 - u73122/635	35.81	1
190406 Ctrl DMSO Inhibitor C1 DAPI C2 BF C3 Factin C4 Gata3 C5 Pard6.lif - ctrl/rescan control/118 rescan:0214-0616-0545:c:4/5 z:46/61 - ctrl/rescan control/118 rescan	15.73	2.02968		Embryo 123				191228 DMSO and U73122 7.5uM C1-Factin C2-GATA3 C3- DAPI BF C4-PARD6B.lif - dmso/633:0137-0524-0291:c:2/5 z:28/63 - dmso/633	21.86			190406 Ctrl DMSO Inhibitor C1 DAPI C2 BF C3 Factin C4 Gata3 C5 Pard6.lif - Inhibitor/104:0154-0750-0362:c:4/5 z:31/61 - Inhibitor/104	18.35			191228 DMSO and U73122 7.5uM C1-Factin C2-GATA3 C3- DAPI BF C4-PARD6B.lif - u73122/635:0067-0528-0656:c:2/5 z:14/60 - u73122/635	35.81
190406 Ctrl DMSO Inhibitor C1 DAPI C2 BF C3 Factin C4 Gata3 C5 Pard6.lif - ctrl/rescan control/118 rescan:0214-0559-0462:c:4/5 z:46/61 - ctrl/rescan control/118 rescan	7.75			190406 Ctrl DMSO Inhibitor C1 DAPI C2 BF C3 Factin C4 Gata3 C5 Pard6.lif - DMSO control/123:0079-0520-0430:c:4/5 z:17/61 - DMSO control/123	31.53	1.66914		191228 DMSO and U73122 7.5uM C1-Factin C2-GATA3 C3- DAPI BF C4-PARD6B.lif - dmso/633:0137-0302-0610:c:2/5 z:28/63 - dmso/633	27.58	0.830473		190406 Ctrl DMSO Inhibitor C1 DAPI C2 BF C3 Factin C4 Gata3 C5 Pard6.lif - Inhibitor/104:0154-0702-0539:c:4/5 z:31/61 - Inhibitor/104	32.6	1.6067		191228 DMSO and U73122 7.5uM C1-Factin C2-GATA3 C3- DAPI BF C4-PARD6B.lif - u73122/635:0067-0460-0478:c:2/5 z:14/60 - u73122/635	20.96	0.842105
190406 Ctrl DMSO Inhibitor C1 DAPI C2 BF C3 Factin C4 Gata3 C5 Pard6.lif - ctrl/rescan control/118 rescan:0179-0429-0601:c:4/5 z:32/61 - ctrl/rescan control/118 rescan	16.43	1.24848		190406 Ctrl DMSO Inhibitor C1 DAPI C2 BF C3 Factin C4 Gata3 C5 Pard6.lif - DMSO control/123:0079-0572-0472:c:4/5 z:17/61 - DMSO control/123	18.89			191228 DMSO and U73122 7.5uM C1-Factin C2-GATA3 C3- DAPI BF C4-PARD6B.lif - dmso/633:0137-0272-0556:c:2/5 z:28/63 - dmso/633	33.21			190406 Ctrl DMSO Inhibitor C1 DAPI C2 BF C3 Factin C4 Gata3 C5 Pard6.lif - Inhibitor/104:0154-0644-0569:c:4/5 z:31/61 - Inhibitor/104	20.29			191228 DMSO and U73122 7.5uM C1-Factin C2-GATA3 C3- DAPI BF C4-PARD6B.lif - u73122/635:0067-0504-0565:c:2/5 z:14/60 - u73122/635	24.89
190406 Ctrl DMSO Inhibitor C1 DAPI C2 BF C3 Factin C4 Gata3 C5 Pard6.lif - ctrl/rescan control/118 rescan:0179-0405-0549:c:4/5 z:32/61 - ctrl/rescan control/118 rescan	13.16			190406 Ctrl DMSO Inhibitor C1 DAPI C2 BF C3 Factin C4 Gata3 C5 Pard6.lif - DMSO control/123:0084-0785-0429:c:4/5 z:17/61 - DMSO control/123	17.93	0.690944		191228 DMSO and U73122 7.5uM C1-Factin C2-GATA3 C3- DAPI BF C4-PARD6B.lif - dmso/633:0102-0600-0581:c:2/5 z:21/63 - dmso/633	21.71	0.823284		190406 Ctrl DMSO Inhibitor C1 DAPI C2 BF C3 Factin C4 Gata3 C5 Pard6.lif - Inhibitor/104:0154-0656-0470:c:4/5 z:31/61 - Inhibitor/104	31	1.79398		191228 DMSO and U73122 7.5uM C1-Factin C2-GATA3 C3- DAPI BF C4-PARD6B.lif - u73122/635:0067-0390-0407:c:2/5 z:14/60 - u73122/635	22.07	0.8611
190406 Ctrl DMSO Inhibitor C1 DAPI C2 BF C3 Factin C4 Gata3 C5 Pard6.lif - ctrl/rescan control/118 rescan:0179-0435-0700:c:4/5 z:32/61 - ctrl/rescan control/118 rescan	16.39	1.03147		190406 Ctrl DMSO Inhibitor C1 DAPI C2 BF C3 Factin C4 Gata3 C5 Pard6.lif - DMSO control/123:0084-0830-0374:c:4/5 z:17/61 - DMSO control/123	25.95			191228 DMSO and U73122 7.5uM C1-Factin C2-GATA3 C3- DAPI BF C4-PARD6B.lif - dmso/633:0102-0537-0630:c:2/5 z:21/63 - dmso/633	26.37			190406 Ctrl DMSO Inhibitor C1 DAPI C2 BF C3 Factin C4 Gata3 C5 Pard6.lif - Inhibitor/104:0154-0620-0500:c:4/5 z:31/61 - Inhibitor/104	17.28			191228 DMSO and U73122 7.5uM C1-Factin C2-GATA3 C3- DAPI BF C4-PARD6B.lif - u73122/635:0067-0384-0467:c:2/5 z:14/60 - u73122/635	25.63
190406 Ctrl DMSO Inhibitor C1 DAPI C2 BF C3 Factin C4 Gata3 C5 Pard6.lif - ctrl/rescan control/118 rescan:0179-0387-0661:c:4/5 z:32/61 - ctrl/rescan control/118 rescan	15.89			190406 Ctrl DMSO Inhibitor C1 DAPI C2 BF C3 Factin C4 Gata3 C5 Pard6.lif - DMSO control/123:0084-0642-0347:c:4/5 z:17/61 - DMSO control/123	28.38	1.33805		Embryo 587				190406 Ctrl DMSO Inhibitor C1 DAPI C2 BF C3 Factin C4 Gata3 C5 Pard6.lif - Inhibitor/104:0154-0592-0407:c:4/5 z:31/61 - Inhibitor/104	24.37	1.32518		191228 DMSO and U73122 7.5uM C1-Factin C2-GATA3 C3- DAPI BF C4-PARD6B.lif - u73122/635:0097-0346-0705:c:2/5 z:20/60 - u73122/635	30.35	1.07854
Embryo 115				190406 Ctrl DMSO Inhibitor C1 DAPI C2 BF C3 Factin C4 Gata3 C5 Pard6.lif - DMSO control/123:0084-0690-0409:c:4/5 z:17/61 - DMSO control/123	21.21			191228 DMSO and U73122 7.5uM C1-Factin C2-GATA3 C3- DAPI BF C4-PARD6B.lif - dmso/587:0107-0522-0435:c:2/5 z:24/61 - dmso/587	17.75	0.901931		190406 Ctrl DMSO Inhibitor C1 DAPI C2 BF C3 Factin C4 Gata3 C5 Pard6.lif - Inhibitor/104:0154-0548-0392:c:4/5 z:31/61 - Inhibitor/104	18.39			191228 DMSO and U73122 7.5uM C1-Factin C2-GATA3 C3- DAPI BF C4-PARD6B.lif - u73122/635:0097-0369-0653:c:2/5 z:20/60 - u73122/635	28.14
190406 Ctrl DMSO Inhibitor C1 DAPI C2 BF C3 Factin C4 Gata3 C5 Pard6.lif - ctrl/rescan control/115 rescan:0169-0303-0292:c:4/5 z:34/67 - ctrl/rescan control/115 rescan	42.42	3.33491		190406 Ctrl DMSO Inhibitor C1 DAPI C2 BF C3 Factin C4 Gata3 C5 Pard6.lif - DMSO control/123:0089-0683-0676:c:4/5 z:18/61 - DMSO control/123	17.1	0.895757		191228 DMSO and U73122 7.5uM C1-Factin C2-GATA3 C3- DAPI BF C4-PARD6B.lif - dmso/587:0107-0483-0513:c:2/5 z:24/61 - dmso/587	19.68			190406 Ctrl DMSO Inhibitor C1 DAPI C2 BF C3 Factin C4 Gata3 C5 Pard6.lif - Inhibitor/104:0154-0523-0289:c:4/5 z:31/61 - Inhibitor/104	39.38	1.77788		191228 DMSO and U73122 7.5uM C1-Factin C2-GATA3 C3- DAPI BF C4-PARD6B.lif - u73122/635:0127-0626-0476:c:2/5 z:26/60 - u73122/635	22.19	0.8876
190406 Ctrl DMSO Inhibitor C1 DAPI C2 BF C3 Factin C4 Gata3 C5 Pard6.lif - ctrl/rescan control/115 rescan:0169-0322-0355:c:4/5 z:34/67 - ctrl/rescan control/115 rescan	12.72			190406 Ctrl DMSO Inhibitor C1 DAPI C2 BF C3 Factin C4 Gata3 C5 Pard6.lif - DMSO control/123:0089-0655-0714:c:4/5 z:18/61 - DMSO control/123	19.09			191228 DMSO and U73122 7.5uM C1-Factin C2-GATA3 C3- DAPI BF C4-PARD6B.lif - dmso/587:0107-0532-0740:c:2/5 z:24/61 - dmso/587	15.55	1.06361		190406 Ctrl DMSO Inhibitor C1 DAPI C2 BF C3 Factin C4 Gata3 C5 Pard6.lif - Inhibitor/104:0154-0457-0344:c:4/5 z:31/61 - Inhibitor/104	22.15			191228 DMSO and U73122 7.5uM C1-Factin C2-GATA3 C3- DAPI BF C4-PARD6B.lif - u73122/635:0127-0655-0577:c:2/5 z:26/60 - u73122/635	25
190406 Ctrl DMSO Inhibitor C1 DAPI C2 BF C3 Factin C4 Gata3 C5 Pard6.lif - ctrl/rescan control/115 rescan:0189-0241-0550:c:4/5 z:41/67 - ctrl/rescan control/115 rescan	17.12	1.35658		190406 Ctrl DMSO Inhibitor C1 DAPI C2 BF C3 Factin C4 Gata3 C5 Pard6.lif - DMSO control/123:0144-0428-0399:c:4/5 z:29/61 - DMSO control/123	24.34	1.59085		191228 DMSO and U73122 7.5uM C1-Factin C2-GATA3 C3- DAPI BF C4-PARD6B.lif - dmso/587:0107-0477-0695:c:2/5 z:24/61 - dmso/587	14.62			190406 Ctrl DMSO Inhibitor C1 DAPI C2 BF C3 Factin C4 Gata3 C5 Pard6.lif - Inhibitor/104:0179-0578-0761:c:4/5 z:37/61 - Inhibitor/104	43.63	1.89861		191228 DMSO and U73122 7.5uM C1-Factin C2-GATA3 C3- DAPI BF C4-PARD6B.lif - u73122/635:0127-0365-0488:c:2/5 z:26/60 - u73122/635	15.54	0.679196
190406 Ctrl DMSO Inhibitor C1 DAPI C2 BF C3 Factin C4 Gata3 C5 Pard6.lif - ctrl/rescan control/115 rescan:0189-0250-0621:c:4/5 z:41/67 - ctrl/rescan control/115 rescan	12.62			190406 Ctrl DMSO Inhibitor C1 DAPI C2 BF C3 Factin C4 Gata3 C5 Pard6.lif - DMSO control/123:0144-0459-0480:c:4/5 z:29/61 - DMSO control/123	15.3			191228 DMSO and U73122 7.5uM C1-Factin C2-GATA3 C3- DAPI BF C4-PARD6B.lif - dmso/587:0107-0704-0465:c:2/5 z:24/61 - dmso/587	18.69	0.838869		190406 Ctrl DMSO Inhibitor C1 DAPI C2 BF C3 Factin C4 Gata3 C5 Pard6.lif - Inhibitor/104:0179-0515-0759:c:4/5 z:37/61 - Inhibitor/104	22.98			191228 DMSO and U73122 7.5uM C1-Factin C2-GATA3 C3- DAPI BF C4-PARD6B.lif - u73122/635:0127-0314-0529:c:2/5 z:26/60 - u73122/635	22.88
190406 Ctrl DMSO Inhibitor C1 DAPI C2 BF C3 Factin C4 Gata3 C5 Pard6.lif - ctrl/rescan control/115 rescan:0189-0365-0402:c:4/5 z:41/67 - ctrl/rescan control/115 rescan	25.98	1.94899		190406 Ctrl DMSO Inhibitor C1 DAPI C2 BF C3 Factin C4 Gata3 C5 Pard6.lif - DMSO control/123:0144-0563-0335:c:4/5 z:29/61 - DMSO control/123	23.3	1.16326		191228 DMSO and U73122 7.5uM C1-Factin C2-GATA3 C3- DAPI BF C4-PARD6B.lif - dmso/587:0107-0656-0512:c:2/5 z:24/61 - dmso/587	22.28			190406 Ctrl DMSO Inhibitor C1 DAPI C2 BF C3 Factin C4 Gata3 C5 Pard6.lif - Inhibitor/104:0179-0425-0637:c:4/5 z:37/61 - Inhibitor/104	42.67	1.92294		191228 DMSO and U73122 7.5uM C1-Factin C2-GATA3 C3- DAPI BF C4-PARD6B.lif - u73122/635:0127-0307-0584:c:2/5 z:26/60 - u73122/635	23.87	0.990456
190406 Ctrl DMSO Inhibitor C1 DAPI C2 BF C3 Factin C4 Gata3 C5 Pard6.lif - ctrl/rescan control/115 rescan:0189-0339-0450:c:4/5 z:41/67 - ctrl/rescan control/115 rescan	13.33			190406 Ctrl DMSO Inhibitor C1 DAPI C2 BF C3 Factin C4 Gata3 C5 Pard6.lif - DMSO control/123:0144-0498-0332:c:4/5 z:29/61 - DMSO control/123	20.03			191228 DMSO and U73122 7.5uM C1-Factin C2-GATA3 C3- DAPI BF C4-PARD6B.lif - dmso/587:0107-0365-0613:c:2/5 z:24/61 - dmso/587	20.77	0.833467		190406 Ctrl DMSO Inhibitor C1 DAPI C2 BF C3 Factin C4 Gata3 C5 Pard6.lif - Inhibitor/104:0179-0388-0573:c:4/5 z:37/61 - Inhibitor/104	22.19			191228 DMSO and U73122 7.5uM C1-Factin C2-GATA3 C3- DAPI BF C4-PARD6B.lif - u73122/635:0127-0350-0623:c:2/5 z:26/60 - u73122/635	24.1
190406 Ctrl DMSO Inhibitor C1 DAPI C2 BF C3 Factin C4 Gata3 C5 Pard6.lif - ctrl/rescan control/115 rescan:0129-0460-0238:c:4/5 z:25/67 - ctrl/rescan control/115 rescan	33.52	3.13271		190406 Ctrl DMSO Inhibitor C1 DAPI C2 BF C3 Factin C4 Gata3 C5 Pard6.lif - DMSO control/123:0144-0380-0570:c:4/5 z:29/61 - DMSO control/123	15.44	0.757605		191228 DMSO and U73122 7.5uM C1-Factin C2-GATA3 C3- DAPI BF C4-PARD6B.lif - dmso/587:0107-0365-0559:c:2/5 z:24/61 - dmso/587	24.92			190406 Ctrl DMSO Inhibitor C1 DAPI C2 BF C3 Factin C4 Gata3 C5 Pard6.lif - Inhibitor/104:0179-0422-0375:c:4/5 z:37/61 - Inhibitor/104	64.21	2.58183		Embryo 634
190406 Ctrl DMSO Inhibitor C1 DAPI C2 BF C3 Factin C4 Gata3 C5 Pard6.lif - ctrl/rescan control/115 rescan:0129-0429-0296:c:4/5 z:25/67 - ctrl/rescan control/115 rescan	10.7			190406 Ctrl DMSO Inhibitor C1 DAPI C2 BF C3 Factin C4 Gata3 C5 Pard6.lif - DMSO control/123:0144-0365-0636:c:4/5 z:29/61 - DMSO control/123	20.38			191228 DMSO and U73122 7.5uM C1-Factin C2-GATA3 C3- DAPI BF C4-PARD6B.lif - dmso/587:0082-0606-0564:c:2/5 z:17/61 - dmso/587	19.65	0.652824		190406 Ctrl DMSO Inhibitor C1 DAPI C2 BF C3 Factin C4 Gata3 C5 Pard6.lif - Inhibitor/104:0179-0455-0338:c:4/5 z:37/61 - Inhibitor/104	24.87			191228 DMSO and U73122 7.5uM C1-Factin C2-GATA3 C3- DAPI BF C4-PARD6B.lif - u73122/634:0087-0601-0699:c:2/5 z:19/62 - u73122/634	18.83	0.991575
190406 Ctrl DMSO Inhibitor C1 DAPI C2 BF C3 Factin C4 Gata3 C5 Pard6.lif - ctrl/rescan control/115 rescan:0129-0221-0351:c:4/5 z:25/67 - ctrl/rescan control/115 rescan	22.3	1.73947		190406 Ctrl DMSO Inhibitor C1 DAPI C2 BF C3 Factin C4 Gata3 C5 Pard6.lif - DMSO control/123:0144-0489-0691:c:4/5 z:29/61 - DMSO control/123	17.83	1.07087		191228 DMSO and U73122 7.5uM C1-Factin C2-GATA3 C3- DAPI BF C4-PARD6B.lif - dmso/587:0082-0674-0579:c:2/5 z:17/61 - dmso/587	30.1			190406 Ctrl DMSO Inhibitor C1 DAPI C2 BF C3 Factin C4 Gata3 C5 Pard6.lif - Inhibitor/104:0104-0372-0486:c:4/5 z:21/61 - Inhibitor/104	69.96	2.66109		191228 DMSO and U73122 7.5uM C1-Factin C2-GATA3 C3- DAPI BF C4-PARD6B.lif - u73122/634:0087-0547-0664:c:2/5 z:19/62 - u73122/634	18.99
190406 Ctrl DMSO Inhibitor C1 DAPI C2 BF C3 Factin C4 Gata3 C5 Pard6.lif - ctrl/rescan control/115 rescan:0129-0227-0415:c:4/5 z:25/67 - ctrl/rescan control/115 rescan	12.82			190406 Ctrl DMSO Inhibitor C1 DAPI C2 BF C3 Factin C4 Gata3 C5 Pard6.lif - DMSO control/123:0144-0581-0757:c:4/5 z:29/61 - DMSO control/123	16.65			Embryo 220				190406 Ctrl DMSO Inhibitor C1 DAPI C2 BF C3 Factin C4 Gata3 C5 Pard6.lif - Inhibitor/104:0104-0315-0525:c:4/5 z:21/61 - Inhibitor/104	26.29			191228 DMSO and U73122 7.5uM C1-Factin C2-GATA3 C3- DAPI BF C4-PARD6B.lif - u73122/634:0087-0659-0507:c:2/5 z:19/62 - u73122/634	19.73	0.969533
190406 Ctrl DMSO Inhibitor C1 DAPI C2 BF C3 Factin C4 Gata3 C5 Pard6.lif - ctrl/rescan control/115 rescan:0129-0166-0466:c:4/5 z:25/67 - ctrl/rescan control/115 rescan	39.72	2.79129		Embryo 122				220120 C1-PARD6B C2-GATA3 C3-DAPI BF C4-FACTIN 7.5uM U73122 treatment DMSO media ctrl.lif - DMSO/220:0137-0502-0496:c:2/5 z:31/85 - DMSO/220	56.18	1.17728		190406 Ctrl DMSO Inhibitor C1 DAPI C2 BF C3 Factin C4 Gata3 C5 Pard6.lif - Inhibitor/104:0104-0508-0366:c:4/5 z:21/61 - Inhibitor/104	62.09	2.05188		191228 DMSO and U73122 7.5uM C1-Factin C2-GATA3 C3- DAPI BF C4-PARD6B.lif - u73122/634:0087-0622-0566:c:2/5 z:19/62 - u73122/634	20.35
190406 Ctrl DMSO Inhibitor C1 DAPI C2 BF C3 Factin C4 Gata3 C5 Pard6.lif - ctrl/rescan control/115 rescan:0129-0165-0520:c:4/5 z:25/67 - ctrl/rescan control/115 rescan	14.23			190406 Ctrl DMSO Inhibitor C1 DAPI C2 BF C3 Factin C4 Gata3 C5 Pard6.lif - DMSO control/122:0154-0318-0557:c:4/5 z:31/61 - DMSO control/122	52.84	1.55184		220120 C1-PARD6B C2-GATA3 C3-DAPI BF C4-FACTIN 7.5uM U73122 treatment DMSO media ctrl.lif - DMSO/220:0137-0519-0464:c:2/5 z:31/85 - DMSO/220	47.72			190406 Ctrl DMSO Inhibitor C1 DAPI C2 BF C3 Factin C4 Gata3 C5 Pard6.lif - Inhibitor/104:0104-0444-0398:c:4/5 z:21/61 - Inhibitor/104	30.26			191228 DMSO and U73122 7.5uM C1-Factin C2-GATA3 C3- DAPI BF C4-PARD6B.lif - u73122/634:0087-0444-0476:c:2/5 z:19/62 - u73122/634	22.1	1.03416
190406 Ctrl DMSO Inhibitor C1 DAPI C2 BF C3 Factin C4 Gata3 C5 Pard6.lif - ctrl/rescan control/115 rescan:0129-0224-0609:c:4/5 z:25/67 - ctrl/rescan control/115 rescan	26.84	2.37943		190406 Ctrl DMSO Inhibitor C1 DAPI C2 BF C3 Factin C4 Gata3 C5 Pard6.lif - DMSO control/122:0154-0337-0647:c:4/5 z:31/61 - DMSO control/122	34.05			220120 C1-PARD6B C2-GATA3 C3-DAPI BF C4-FACTIN 7.5uM U73122 treatment DMSO media ctrl.lif - DMSO/220:0152-0471-0620:c:2/5 z:31/85 - DMSO/220	29.6	0.709832		190406 Ctrl DMSO Inhibitor C1 DAPI C2 BF C3 Factin C4 Gata3 C5 Pard6.lif - Inhibitor/104:0104-0711-0343:c:4/5 z:21/61 - Inhibitor/104	76.34	3.45274		191228 DMSO and U73122 7.5uM C1-Factin C2-GATA3 C3- DAPI BF C4-PARD6B.lif - u73122/634:0087-0471-0549:c:2/5 z:19/62 - u73122/634	21.37
190406 Ctrl DMSO Inhibitor C1 DAPI C2 BF C3 Factin C4 Gata3 C5 Pard6.lif - ctrl/rescan control/115 rescan:0129-0253-0659:c:4/5 z:25/67 - ctrl/rescan control/115 rescan	11.28			190406 Ctrl DMSO Inhibitor C1 DAPI C2 BF C3 Factin C4 Gata3 C5 Pard6.lif - DMSO control/122:0154-0631-0596:c:4/5 z:31/61 - DMSO control/122	52.07	1.66464		220120 C1-PARD6B C2-GATA3 C3-DAPI BF C4-FACTIN 7.5uM U73122 treatment DMSO media ctrl.lif - DMSO/220:0152-0487-0578:c:2/5 z:31/85 - DMSO/220	41.7			190406 Ctrl DMSO Inhibitor C1 DAPI C2 BF C3 Factin C4 Gata3 C5 Pard6.lif - Inhibitor/104:0104-0634-0346:c:4/5 z:21/61 - Inhibitor/104	22.11			191228 DMSO and U73122 7.5uM C1-Factin C2-GATA3 C3- DAPI BF C4-PARD6B.lif - u73122/634:0067-0436-0556:c:2/5 z:14/62 - u73122/634	18.28	0.684644
190406 Ctrl DMSO Inhibitor C1 DAPI C2 BF C3 Factin C4 Gata3 C5 Pard6.lif - ctrl/rescan control/115 rescan:0129-0389-0652:c:4/5 z:25/67 - ctrl/rescan control/115 rescan	22.8	1.99301		190406 Ctrl DMSO Inhibitor C1 DAPI C2 BF C3 Factin C4 Gata3 C5 Pard6.lif - DMSO control/122:0154-0529-0637:c:4/5 z:31/61 - DMSO control/122	31.28			220120 C1-PARD6B C2-GATA3 C3-DAPI BF C4-FACTIN 7.5uM U73122 treatment DMSO media ctrl.lif - DMSO/220:0152-0475-0698:c:2/5 z:31/85 - DMSO/220	53.17	0.929221		Embryo 103				191228 DMSO and U73122 7.5uM C1-Factin C2-GATA3 C3- DAPI BF C4-PARD6B.lif - u73122/634:0067-0451-0631:c:2/5 z:14/62 - u73122/634	26.7
190406 Ctrl DMSO Inhibitor C1 DAPI C2 BF C3 Factin C4 Gata3 C5 Pard6.lif - ctrl/rescan control/115 rescan:0129-0382-0710:c:4/5 z:25/67 - ctrl/rescan control/115 rescan	11.44			190406 Ctrl DMSO Inhibitor C1 DAPI C2 BF C3 Factin C4 Gata3 C5 Pard6.lif - DMSO control/122:0154-0498-0477:c:4/5 z:31/61 - DMSO control/122	47.43	1.52312		220120 C1-PARD6B C2-GATA3 C3-DAPI BF C4-FACTIN 7.5uM U73122 treatment DMSO media ctrl.lif - DMSO/220:0152-0445-0733:c:2/5 z:31/85 - DMSO/220	57.22			190406 Ctrl DMSO Inhibitor C1 DAPI C2 BF C3 Factin C4 Gata3 C5 Pard6.lif - Inhibitor/103:0154-0380-0328:c:4/5 z:31/61 - Inhibitor/103	37.52	2.15632		191228 DMSO and U73122 7.5uM C1-Factin C2-GATA3 C3- DAPI BF C4-PARD6B.lif - u73122/634:0067-0652-0512:c:2/5 z:14/62 - u73122/634	24	0.857143
190406 Ctrl DMSO Inhibitor C1 DAPI C2 BF C3 Factin C4 Gata3 C5 Pard6.lif - ctrl/rescan control/115 rescan:0129-0489-0752:c:4/5 z:25/67 - ctrl/rescan control/115 rescan	28.79	1.94396		190406 Ctrl DMSO Inhibitor C1 DAPI C2 BF C3 Factin C4 Gata3 C5 Pard6.lif - DMSO control/122:0154-0502-0411:c:4/5 z:31/61 - DMSO control/122	31.14			220120 C1-PARD6B C2-GATA3 C3-DAPI BF C4-FACTIN 7.5uM U73122 treatment DMSO media ctrl.lif - DMSO/220:0152-0619-0712:c:2/5 z:31/85 - DMSO/220	54.59	0.959909		190406 Ctrl DMSO Inhibitor C1 DAPI C2 BF C3 Factin C4 Gata3 C5 Pard6.lif - Inhibitor/103:0154-0426-0263:c:4/5 z:31/61 - Inhibitor/103	17.4			191228 DMSO and U73122 7.5uM C1-Factin C2-GATA3 C3- DAPI BF C4-PARD6B.lif - u73122/634:0067-0649-0580:c:2/5 z:14/62 - u73122/634	28
190406 Ctrl DMSO Inhibitor C1 DAPI C2 BF C3 Factin C4 Gata3 C5 Pard6.lif - ctrl/rescan control/115 rescan:0129-0447-0807:c:4/5 z:25/67 - ctrl/rescan control/115 rescan	14.81			190406 Ctrl DMSO Inhibitor C1 DAPI C2 BF C3 Factin C4 Gata3 C5 Pard6.lif - DMSO control/122:0154-0599-0336:c:4/5 z:31/61 - DMSO control/122	52.06	1.46855		220120 C1-PARD6B C2-GATA3 C3-DAPI BF C4-FACTIN 7.5uM U73122 treatment DMSO media ctrl.lif - DMSO/220:0152-0571-0692:c:2/5 z:31/85 - DMSO/220	56.87			190406 Ctrl DMSO Inhibitor C1 DAPI C2 BF C3 Factin C4 Gata3 C5 Pard6.lif - Inhibitor/103:0154-0357-0477:c:4/5 z:31/61 - Inhibitor/103	15.19	0.551561		191228 DMSO and U73122 7.5uM C1-Factin C2-GATA3 C3- DAPI BF C4-PARD6B.lif - u73122/634:0137-0417-0657:c:2/5 z:30/62 - u73122/634	15.25	0.592924
190406 Ctrl DMSO Inhibitor C1 DAPI C2 BF C3 Factin C4 Gata3 C5 Pard6.lif - ctrl/rescan control/115 rescan:0069-0310-0347:c:4/5 z:14/67 - ctrl/rescan control/115 rescan	27.74	3.01522		190406 Ctrl DMSO Inhibitor C1 DAPI C2 BF C3 Factin C4 Gata3 C5 Pard6.lif - DMSO control/122:0154-0651-0348:c:4/5 z:31/61 - DMSO control/122	35.45			220120 C1-PARD6B C2-GATA3 C3-DAPI BF C4-FACTIN 7.5uM U73122 treatment DMSO media ctrl.lif - DMSO/220:0182-0388-0621:c:2/5 z:37/85 - DMSO/220	40.93	0.767342		190406 Ctrl DMSO Inhibitor C1 DAPI C2 BF C3 Factin C4 Gata3 C5 Pard6.lif - Inhibitor/103:0154-0309-0528:c:4/5 z:31/61 - Inhibitor/103	27.54			191228 DMSO and U73122 7.5uM C1-Factin C2-GATA3 C3- DAPI BF C4-PARD6B.lif - u73122/634:0137-0359-0698:c:2/5 z:30/62 - u73122/634	25.72
190406 Ctrl DMSO Inhibitor C1 DAPI C2 BF C3 Factin C4 Gata3 C5 Pard6.lif - ctrl/rescan control/115 rescan:0069-0278-0403:c:4/5 z:14/67 - ctrl/rescan control/115 rescan	9.2			190406 Ctrl DMSO Inhibitor C1 DAPI C2 BF C3 Factin C4 Gata3 C5 Pard6.lif - DMSO control/122:0204-0626-0673:c:4/5 z:41/61 - DMSO control/122	37.6	1.43238		220120 C1-PARD6B C2-GATA3 C3-DAPI BF C4-FACTIN 7.5uM U73122 treatment DMSO media ctrl.lif - DMSO/220:0182-0373-0566:c:2/5 z:37/85 - DMSO/220	53.34			190406 Ctrl DMSO Inhibitor C1 DAPI C2 BF C3 Factin C4 Gata3 C5 Pard6.lif - Inhibitor/103:0154-0818-0485:c:4/5 z:31/61 - Inhibitor/103	25.06	2.14739		191228 DMSO and U73122 7.5uM C1-Factin C2-GATA3 C3- DAPI BF C4-PARD6B.lif - u73122/634:0137-0515-0451:c:2/5 z:30/62 - u73122/634	10.94	0.786485
Embryo 113				190406 Ctrl DMSO Inhibitor C1 DAPI C2 BF C3 Factin C4 Gata3 C5 Pard6.lif - DMSO control/122:0204-0676-0593:c:4/5 z:41/61 - DMSO control/122	26.25			220120 C1-PARD6B C2-GATA3 C3-DAPI BF C4-FACTIN 7.5uM U73122 treatment DMSO media ctrl.lif - DMSO/220:0182-0679-0735:c:2/5 z:37/85 - DMSO/220	24.79	0.618513		190406 Ctrl DMSO Inhibitor C1 DAPI C2 BF C3 Factin C4 Gata3 C5 Pard6.lif - Inhibitor/103:0154-0740-0505:c:4/5 z:31/61 - Inhibitor/103	11.67			191228 DMSO and U73122 7.5uM C1-Factin C2-GATA3 C3- DAPI BF C4-PARD6B.lif - u73122/634:0137-0581-0453:c:2/5 z:30/62 - u73122/634	13.91
190406 Ctrl DMSO Inhibitor C1 DAPI C2 BF C3 Factin C4 Gata3 C5 Pard6.lif - ctrl/rescan control/113 rescan:0154-0173-0517:c:4/5 z:31/67 - ctrl/rescan control/113 rescan	44.31	2.40163		190406 Ctrl DMSO Inhibitor C1 DAPI C2 BF C3 Factin C4 Gata3 C5 Pard6.lif - DMSO control/122:0204-0549-0525:c:4/5 z:41/61 - DMSO control/122	26.02	1.09466		220120 C1-PARD6B C2-GATA3 C3-DAPI BF C4-FACTIN 7.5uM U73122 treatment DMSO media ctrl.lif - DMSO/220:0182-0651-0708:c:2/5 z:37/85 - DMSO/220	40.08			190406 Ctrl DMSO Inhibitor C1 DAPI C2 BF C3 Factin C4 Gata3 C5 Pard6.lif - Inhibitor/103:0154-0612-0470:c:4/5 z:31/61 - Inhibitor/103	22.72	1.43434		191228 DMSO and U73122 7.5uM C1-Factin C2-GATA3 C3- DAPI BF C4-PARD6B.lif - u73122/634:0137-0498-0317:c:2/5 z:30/62 - u73122/634	25.79	1.08544
190406 Ctrl DMSO Inhibitor C1 DAPI C2 BF C3 Factin C4 Gata3 C5 Pard6.lif - ctrl/rescan control/113 rescan:0154-0175-0586:c:4/5 z:31/67 - ctrl/rescan control/113 rescan	18.45			190406 Ctrl DMSO Inhibitor C1 DAPI C2 BF C3 Factin C4 Gata3 C5 Pard6.lif - DMSO control/122:0204-0522-0588:c:4/5 z:41/61 - DMSO control/122	23.77			220120 C1-PARD6B C2-GATA3 C3-DAPI BF C4-FACTIN 7.5uM U73122 treatment DMSO media ctrl.lif - DMSO/220:0182-0575-0533:c:2/5 z:37/85 - DMSO/220	41.95	0.81267		190406 Ctrl DMSO Inhibitor C1 DAPI C2 BF C3 Factin C4 Gata3 C5 Pard6.lif - Inhibitor/103:0154-0556-0442:c:4/5 z:31/61 - Inhibitor/103	15.84			191228 DMSO and U73122 7.5uM C1-Factin C2-GATA3 C3- DAPI BF C4-PARD6B.lif - u73122/634:0137-0561-0309:c:2/5 z:30/62 - u73122/634	23.76
190406 Ctrl DMSO Inhibitor C1 DAPI C2 BF C3 Factin C4 Gata3 C5 Pard6.lif - ctrl/rescan control/113 rescan:0154-0178-0381:c:4/5 z:31/67 - ctrl/rescan control/113 rescan	33.57	2.20565		190406 Ctrl DMSO Inhibitor C1 DAPI C2 BF C3 Factin C4 Gata3 C5 Pard6.lif - DMSO control/122:0204-0406-0504:c:4/5 z:41/61 - DMSO control/122	27.46	0.971348		220120 C1-PARD6B C2-GATA3 C3-DAPI BF C4-FACTIN 7.5uM U73122 treatment DMSO media ctrl.lif - DMSO/220:0182-0600-0508:c:2/5 z:37/85 - DMSO/220	51.62			190406 Ctrl DMSO Inhibitor C1 DAPI C2 BF C3 Factin C4 Gata3 C5 Pard6.lif - Inhibitor/103:0069-0486-0313:c:4/5 z:14/61 - Inhibitor/103	38.42	1.82345		Embryo 637
190406 Ctrl DMSO Inhibitor C1 DAPI C2 BF C3 Factin C4 Gata3 C5 Pard6.lif - ctrl/rescan control/113 rescan:0154-0218-0351:c:4/5 z:31/67 - ctrl/rescan control/113 rescan	15.22			190406 Ctrl DMSO Inhibitor C1 DAPI C2 BF C3 Factin C4 Gata3 C5 Pard6.lif - DMSO control/122:0204-0399-0437:c:4/5 z:41/61 - DMSO control/122	28.27			220120 C1-PARD6B C2-GATA3 C3-DAPI BF C4-FACTIN 7.5uM U73122 treatment DMSO media ctrl.lif - DMSO/220:0182-0696-0617:c:2/5 z:37/85 - DMSO/220	56.46	1.15958		190406 Ctrl DMSO Inhibitor C1 DAPI C2 BF C3 Factin C4 Gata3 C5 Pard6.lif - Inhibitor/103:0069-0399-0373:c:4/5 z:14/61 - Inhibitor/103	21.07			191228 DMSO and U73122 7.5uM C1-Factin C2-GATA3 C3- DAPI BF C4-PARD6B.lif - u73122/637:0077-0589-0607:c:2/5 z:16/58 - u73122/637	23.96	1
190406 Ctrl DMSO Inhibitor C1 DAPI C2 BF C3 Factin C4 Gata3 C5 Pard6.lif - ctrl/rescan control/113 rescan:0154-0466-0243:c:4/5 z:31/67 - ctrl/rescan control/113 rescan	19.08	2.14141		Embryo 121				220120 C1-PARD6B C2-GATA3 C3-DAPI BF C4-FACTIN 7.5uM U73122 treatment DMSO media ctrl.lif - DMSO/220:0182-0636-0620:c:2/5 z:37/85 - DMSO/220	48.69			190406 Ctrl DMSO Inhibitor C1 DAPI C2 BF C3 Factin C4 Gata3 C5 Pard6.lif - Inhibitor/103:0099-0646-0627:c:4/5 z:19/61 - Inhibitor/103	16.71	0.639006		191228 DMSO and U73122 7.5uM C1-Factin C2-GATA3 C3- DAPI BF C4-PARD6B.lif - u73122/637:0077-0589-0607:c:2/5 z:16/58 - u73122/637	23.96
190406 Ctrl DMSO Inhibitor C1 DAPI C2 BF C3 Factin C4 Gata3 C5 Pard6.lif - ctrl/rescan control/113 rescan:0154-0449-0320:c:4/5 z:31/67 - ctrl/rescan control/113 rescan	8.91			190406 Ctrl DMSO Inhibitor C1 DAPI C2 BF C3 Factin C4 Gata3 C5 Pard6.lif - DMSO control/121:0104-0641-0641:c:4/5 z:20/61 - DMSO control/121	45.11	1.96815		Embryo 219				190406 Ctrl DMSO Inhibitor C1 DAPI C2 BF C3 Factin C4 Gata3 C5 Pard6.lif - Inhibitor/103:0099-0711-0671:c:4/5 z:19/61 - Inhibitor/103	26.15			191228 DMSO and U73122 7.5uM C1-Factin C2-GATA3 C3- DAPI BF C4-PARD6B.lif - u73122/637:0077-0471-0596:c:2/5 z:16/58 - u73122/637	11.7	0.347284
190406 Ctrl DMSO Inhibitor C1 DAPI C2 BF C3 Factin C4 Gata3 C5 Pard6.lif - ctrl/rescan control/113 rescan:0154-0504-0396:c:4/5 z:31/67 - ctrl/rescan control/113 rescan	17.07	2.07664		190406 Ctrl DMSO Inhibitor C1 DAPI C2 BF C3 Factin C4 Gata3 C5 Pard6.lif - DMSO control/121:0104-0610-0578:c:4/5 z:20/61 - DMSO control/121	22.92			220120 C1-PARD6B C2-GATA3 C3-DAPI BF C4-FACTIN 7.5uM U73122 treatment DMSO media ctrl.lif - DMSO/219:0157-0620-0452:c:2/5 z:32/85 - DMSO/219	63.78	1		Embryo 102				191228 DMSO and U73122 7.5uM C1-Factin C2-GATA3 C3- DAPI BF C4-PARD6B.lif - u73122/637:0077-0444-0629:c:2/5 z:16/58 - u73122/637	33.69
190406 Ctrl DMSO Inhibitor C1 DAPI C2 BF C3 Factin C4 Gata3 C5 Pard6.lif - ctrl/rescan control/113 rescan:0154-0511-0456:c:4/5 z:31/67 - ctrl/rescan control/113 rescan	8.22			190406 Ctrl DMSO Inhibitor C1 DAPI C2 BF C3 Factin C4 Gata3 C5 Pard6.lif - DMSO control/121:0104-0690-0487:c:4/5 z:20/61 - DMSO control/121	44.37	1.2902		220120 C1-PARD6B C2-GATA3 C3-DAPI BF C4-FACTIN 7.5uM U73122 treatment DMSO media ctrl.lif - DMSO/219:0157-0620-0452:c:2/5 z:32/85 - DMSO/219	63.78			190406 Ctrl DMSO Inhibitor C1 DAPI C2 BF C3 Factin C4 Gata3 C5 Pard6.lif - Inhibitor/102:0194-0582-0708:c:4/5 z:39/61 - Inhibitor/102	40.05	1.76899		191228 DMSO and U73122 7.5uM C1-Factin C2-GATA3 C3- DAPI BF C4-PARD6B.lif - u73122/637:0132-0626-0522:c:2/5 z:27/58 - u73122/637	14.04	1.06203
190406 Ctrl DMSO Inhibitor C1 DAPI C2 BF C3 Factin C4 Gata3 C5 Pard6.lif - ctrl/rescan control/113 rescan:0154-0672-0469:c:4/5 z:31/67 - ctrl/rescan control/113 rescan	15.07	2.13154		190406 Ctrl DMSO Inhibitor C1 DAPI C2 BF C3 Factin C4 Gata3 C5 Pard6.lif - DMSO control/121:0104-0732-0436:c:4/5 z:20/61 - DMSO control/121	34.39			220120 C1-PARD6B C2-GATA3 C3-DAPI BF C4-FACTIN 7.5uM U73122 treatment DMSO media ctrl.lif - DMSO/219:0157-0401-0607:c:2/5 z:32/85 - DMSO/219	26.92	0.552318		190406 Ctrl DMSO Inhibitor C1 DAPI C2 BF C3 Factin C4 Gata3 C5 Pard6.lif - Inhibitor/102:0194-0671-0603:c:4/5 z:39/61 - Inhibitor/102	22.64			191228 DMSO and U73122 7.5uM C1-Factin C2-GATA3 C3- DAPI BF C4-PARD6B.lif - u73122/637:0132-0543-0493:c:2/5 z:27/58 - u73122/637	13.22
190406 Ctrl DMSO Inhibitor C1 DAPI C2 BF C3 Factin C4 Gata3 C5 Pard6.lif - ctrl/rescan control/113 rescan:0154-0723-0502:c:4/5 z:31/67 - ctrl/rescan control/113 rescan	7.07			190406 Ctrl DMSO Inhibitor C1 DAPI C2 BF C3 Factin C4 Gata3 C5 Pard6.lif - DMSO control/121:0104-0313-0547:c:4/5 z:20/61 - DMSO control/121	49.74	1.41588		220120 C1-PARD6B C2-GATA3 C3-DAPI BF C4-FACTIN 7.5uM U73122 treatment DMSO media ctrl.lif - DMSO/219:0157-0346-0630:c:2/5 z:32/85 - DMSO/219	48.74			190406 Ctrl DMSO Inhibitor C1 DAPI C2 BF C3 Factin C4 Gata3 C5 Pard6.lif - Inhibitor/102:0194-0612-0336:c:4/5 z:39/61 - Inhibitor/102	18.39	1.40168		191228 DMSO and U73122 7.5uM C1-Factin C2-GATA3 C3- DAPI BF C4-PARD6B.lif - u73122/637:0132-0652-0312:c:2/5 z:27/58 - u73122/637	24.01	1.13201
190406 Ctrl DMSO Inhibitor C1 DAPI C2 BF C3 Factin C4 Gata3 C5 Pard6.lif - ctrl/rescan control/113 rescan:0234-0322-0277:c:4/5 z:47/67 - ctrl/rescan control/113 rescan	29.97	2.16703		190406 Ctrl DMSO Inhibitor C1 DAPI C2 BF C3 Factin C4 Gata3 C5 Pard6.lif - DMSO control/121:0104-0321-0476:c:4/5 z:20/61 - DMSO control/121	35.13			Embryo 218				190406 Ctrl DMSO Inhibitor C1 DAPI C2 BF C3 Factin C4 Gata3 C5 Pard6.lif - Inhibitor/102:0194-0514-0328:c:4/5 z:39/61 - Inhibitor/102	13.12			191228 DMSO and U73122 7.5uM C1-Factin C2-GATA3 C3- DAPI BF C4-PARD6B.lif - u73122/637:0132-0684-0367:c:2/5 z:27/58 - u73122/637	21.21
190406 Ctrl DMSO Inhibitor C1 DAPI C2 BF C3 Factin C4 Gata3 C5 Pard6.lif - ctrl/rescan control/113 rescan:0234-0317-0336:c:4/5 z:47/67 - ctrl/rescan control/113 rescan	13.83			190406 Ctrl DMSO Inhibitor C1 DAPI C2 BF C3 Factin C4 Gata3 C5 Pard6.lif - DMSO control/121:0139-0411-0354:c:4/5 z:29/61 - DMSO control/121	40.28	1.29935		220120 C1-PARD6B C2-GATA3 C3-DAPI BF C4-FACTIN 7.5uM U73122 treatment DMSO media ctrl.lif - DMSO/218:0187-0361-0391:c:2/5 z:39/90 - DMSO/218	59.83	1		190406 Ctrl DMSO Inhibitor C1 DAPI C2 BF C3 Factin C4 Gata3 C5 Pard6.lif - Inhibitor/102:0164-0285-0690:c:4/5 z:33/61 - Inhibitor/102	39.29	1.53058		191228 DMSO and U73122 7.5uM C1-Factin C2-GATA3 C3- DAPI BF C4-PARD6B.lif - u73122/637:0132-0470-0337:c:2/5 z:27/58 - u73122/637	24.06	1.02908
190406 Ctrl DMSO Inhibitor C1 DAPI C2 BF C3 Factin C4 Gata3 C5 Pard6.lif - ctrl/rescan control/113 rescan:0234-0279-0642:c:4/5 z:47/67 - ctrl/rescan control/113 rescan	28.44	2.54155		190406 Ctrl DMSO Inhibitor C1 DAPI C2 BF C3 Factin C4 Gata3 C5 Pard6.lif - DMSO control/121:0139-0334-0404:c:4/5 z:29/61 - DMSO control/121	31			220120 C1-PARD6B C2-GATA3 C3-DAPI BF C4-FACTIN 7.5uM U73122 treatment DMSO media ctrl.lif - DMSO/218:0187-0361-0391:c:2/5 z:39/90 - DMSO/218	59.83			190406 Ctrl DMSO Inhibitor C1 DAPI C2 BF C3 Factin C4 Gata3 C5 Pard6.lif - Inhibitor/102:0164-0324-0759:c:4/5 z:33/61 - Inhibitor/102	25.67			191228 DMSO and U73122 7.5uM C1-Factin C2-GATA3 C3- DAPI BF C4-PARD6B.lif - u73122/637:0132-0532-0333:c:2/5 z:27/58 - u73122/637	23.38
190406 Ctrl DMSO Inhibitor C1 DAPI C2 BF C3 Factin C4 Gata3 C5 Pard6.lif - ctrl/rescan control/113 rescan:0234-0338-0617:c:4/5 z:47/67 - ctrl/rescan control/113 rescan	11.19			190406 Ctrl DMSO Inhibitor C1 DAPI C2 BF C3 Factin C4 Gata3 C5 Pard6.lif - DMSO control/121:0139-0341-0534:c:4/5 z:29/61 - DMSO control/121	42.38	1.22841		220120 C1-PARD6B C2-GATA3 C3-DAPI BF C4-FACTIN 7.5uM U73122 treatment DMSO media ctrl.lif - DMSO/218:0167-0437-0751:c:2/5 z:33/90 - DMSO/218	32.81	0.499315		190406 Ctrl DMSO Inhibitor C1 DAPI C2 BF C3 Factin C4 Gata3 C5 Pard6.lif - Inhibitor/102:0094-0364-0524:c:4/5 z:19/61 - Inhibitor/102	34.2	1.16564		191228 DMSO and U73122 7.5uM C1-Factin C2-GATA3 C3- DAPI BF C4-PARD6B.lif - u73122/637:0132-0347-0460:c:2/5 z:27/58 - u73122/637	24.01	0.840098
Embryo 117				190406 Ctrl DMSO Inhibitor C1 DAPI C2 BF C3 Factin C4 Gata3 C5 Pard6.lif - DMSO control/121:0139-0270-0570:c:4/5 z:29/61 - DMSO control/121	34.5			220120 C1-PARD6B C2-GATA3 C3-DAPI BF C4-FACTIN 7.5uM U73122 treatment DMSO media ctrl.lif - DMSO/218:0167-0385-0749:c:2/5 z:33/90 - DMSO/218	65.71			190406 Ctrl DMSO Inhibitor C1 DAPI C2 BF C3 Factin C4 Gata3 C5 Pard6.lif - Inhibitor/102:0094-0410-0618:c:4/5 z:19/61 - Inhibitor/102	29.34			191228 DMSO and U73122 7.5uM C1-Factin C2-GATA3 C3- DAPI BF C4-PARD6B.lif - u73122/637:0132-0335-0418:c:2/5 z:27/58 - u73122/637	28.58
190406 Ctrl DMSO Inhibitor C1 DAPI C2 BF C3 Factin C4 Gata3 C5 Pard6.lif - ctrl/117:0214-0537-0710:c:4/5 z:43/66 - ctrl/117	45.01	1.50184		190406 Ctrl DMSO Inhibitor C1 DAPI C2 BF C3 Factin C4 Gata3 C5 Pard6.lif - DMSO control/121:0139-0537-0746:c:4/5 z:29/61 - DMSO control/121	37.84	2.02787		220120 C1-PARD6B C2-GATA3 C3-DAPI BF C4-FACTIN 7.5uM U73122 treatment DMSO media ctrl.lif - DMSO/218:0167-0574-0675:c:2/5 z:33/90 - DMSO/218	47.76	0.778357		190406 Ctrl DMSO Inhibitor C1 DAPI C2 BF C3 Factin C4 Gata3 C5 Pard6.lif - Inhibitor/102:0094-0236-0534:c:4/5 z:19/61 - Inhibitor/102	40.49	1.37862		Embryo 585
190406 Ctrl DMSO Inhibitor C1 DAPI C2 BF C3 Factin C4 Gata3 C5 Pard6.lif - ctrl/117:0214-0468-0711:c:4/5 z:43/66 - ctrl/117	29.97			190406 Ctrl DMSO Inhibitor C1 DAPI C2 BF C3 Factin C4 Gata3 C5 Pard6.lif - DMSO control/121:0139-0513-0674:c:4/5 z:29/61 - DMSO control/121	18.66			220120 C1-PARD6B C2-GATA3 C3-DAPI BF C4-FACTIN 7.5uM U73122 treatment DMSO media ctrl.lif - DMSO/218:0167-0655-0656:c:2/5 z:33/90 - DMSO/218	61.36			190406 Ctrl DMSO Inhibitor C1 DAPI C2 BF C3 Factin C4 Gata3 C5 Pard6.lif - Inhibitor/102:0094-0273-0569:c:4/5 z:19/61 - Inhibitor/102	29.37			191228 DMSO and U73122 7.5uM C1-Factin C2-GATA3 C3- DAPI BF C4-PARD6B.lif - u73122/585:0072-0600-0469:c:2/5 z:15/50 - u73122/585	21.98	0.563301
190406 Ctrl DMSO Inhibitor C1 DAPI C2 BF C3 Factin C4 Gata3 C5 Pard6.lif - ctrl/117:0224-0638-0372:c:4/5 z:47/66 - ctrl/117	35.11	1.1622		Embryo 120				220120 C1-PARD6B C2-GATA3 C3-DAPI BF C4-FACTIN 7.5uM U73122 treatment DMSO media ctrl.lif - DMSO/218:0262-0465-0643:c:2/5 z:54/90 - DMSO/218	18.68	0.783229		Embryo 101				191228 DMSO and U73122 7.5uM C1-Factin C2-GATA3 C3- DAPI BF C4-PARD6B.lif - u73122/585:0072-0617-0396:c:2/5 z:15/50 - u73122/585	39.02
190406 Ctrl DMSO Inhibitor C1 DAPI C2 BF C3 Factin C4 Gata3 C5 Pard6.lif - ctrl/117:0224-0708-0395:c:4/5 z:47/66 - ctrl/117	30.21			190406 Ctrl DMSO Inhibitor C1 DAPI C2 BF C3 Factin C4 Gata3 C5 Pard6.lif - DMSO control/120:0184-0442-0544:c:4/5 z:37/61 - DMSO control/120	26.88	0.815781		220120 C1-PARD6B C2-GATA3 C3-DAPI BF C4-FACTIN 7.5uM U73122 treatment DMSO media ctrl.lif - DMSO/218:0262-0513-0595:c:2/5 z:54/90 - DMSO/218	23.85			190406 Ctrl DMSO Inhibitor C1 DAPI C2 BF C3 Factin C4 Gata3 C5 Pard6.lif - Inhibitor/101:0134-0345-0320:c:4/5 z:27/61 - Inhibitor/101	36.05	1.15879		191228 DMSO and U73122 7.5uM C1-Factin C2-GATA3 C3- DAPI BF C4-PARD6B.lif - u73122/585:0072-0399-0528:c:2/5 z:15/50 - u73122/585	19.24	0.678899
190406 Ctrl DMSO Inhibitor C1 DAPI C2 BF C3 Factin C4 Gata3 C5 Pard6.lif - ctrl/117:0234-0663-0520:c:4/5 z:47/66 - ctrl/117	24.5	1.03682		190406 Ctrl DMSO Inhibitor C1 DAPI C2 BF C3 Factin C4 Gata3 C5 Pard6.lif - DMSO control/120:0184-0376-0528:c:4/5 z:37/61 - DMSO control/120	32.95			220120 C1-PARD6B C2-GATA3 C3-DAPI BF C4-FACTIN 7.5uM U73122 treatment DMSO media ctrl.lif - DMSO/218:0262-0270-0519:c:2/5 z:54/90 - DMSO/218	37.8	1.16165		190406 Ctrl DMSO Inhibitor C1 DAPI C2 BF C3 Factin C4 Gata3 C5 Pard6.lif - Inhibitor/101:0134-0278-0391:c:4/5 z:27/61 - Inhibitor/101	31.11			191228 DMSO and U73122 7.5uM C1-Factin C2-GATA3 C3- DAPI BF C4-PARD6B.lif - u73122/585:0072-0435-0437:c:2/5 z:15/50 - u73122/585	28.34
190406 Ctrl DMSO Inhibitor C1 DAPI C2 BF C3 Factin C4 Gata3 C5 Pard6.lif - ctrl/117:0234-0657-0608:c:4/5 z:47/66 - ctrl/117	23.63			190406 Ctrl DMSO Inhibitor C1 DAPI C2 BF C3 Factin C4 Gata3 C5 Pard6.lif - DMSO control/120:0184-0516-0294:c:4/5 z:37/61 - DMSO control/120	22.92	0.823868		220120 C1-PARD6B C2-GATA3 C3-DAPI BF C4-FACTIN 7.5uM U73122 treatment DMSO media ctrl.lif - DMSO/218:0262-0359-0525:c:2/5 z:54/90 - DMSO/218	32.54			190406 Ctrl DMSO Inhibitor C1 DAPI C2 BF C3 Factin C4 Gata3 C5 Pard6.lif - Inhibitor/101:0134-0664-0330:c:4/5 z:27/61 - Inhibitor/101	34.19	1.46612		191228 DMSO and U73122 7.5uM C1-Factin C2-GATA3 C3- DAPI BF C4-PARD6B.lif - u73122/585:0072-0545-0626:c:2/5 z:15/50 - u73122/585	27.3	0.92952
190406 Ctrl DMSO Inhibitor C1 DAPI C2 BF C3 Factin C4 Gata3 C5 Pard6.lif - ctrl/117:0269-0340-0659:c:4/5 z:55/66 - ctrl/117	66.46	3.41697		190406 Ctrl DMSO Inhibitor C1 DAPI C2 BF C3 Factin C4 Gata3 C5 Pard6.lif - DMSO control/120:0184-0468-0358:c:4/5 z:37/61 - DMSO control/120	27.82			Embryo 217				190406 Ctrl DMSO Inhibitor C1 DAPI C2 BF C3 Factin C4 Gata3 C5 Pard6.lif - Inhibitor/101:0134-0595-0331:c:4/5 z:27/61 - Inhibitor/101	23.32			191228 DMSO and U73122 7.5uM C1-Factin C2-GATA3 C3- DAPI BF C4-PARD6B.lif - u73122/585:0072-0504-0592:c:2/5 z:15/50 - u73122/585	29.37
190406 Ctrl DMSO Inhibitor C1 DAPI C2 BF C3 Factin C4 Gata3 C5 Pard6.lif - ctrl/117:0269-0368-0605:c:4/5 z:55/66 - ctrl/117	19.45			190406 Ctrl DMSO Inhibitor C1 DAPI C2 BF C3 Factin C4 Gata3 C5 Pard6.lif - DMSO control/120:0219-0895-0398:c:4/5 z:44/61 - DMSO control/120	16.32	0.911732		220120 C1-PARD6B C2-GATA3 C3-DAPI BF C4-FACTIN 7.5uM U73122 treatment DMSO media ctrl.lif - DMSO/217:0207-0418-0747:c:2/5 z:44/99 - DMSO/217	33.67	0.727843		190406 Ctrl DMSO Inhibitor C1 DAPI C2 BF C3 Factin C4 Gata3 C5 Pard6.lif - Inhibitor/101:0134-0576-0480:c:4/5 z:27/61 - Inhibitor/101	35.87	1.28659		191228 DMSO and U73122 7.5uM C1-Factin C2-GATA3 C3- DAPI BF C4-PARD6B.lif - u73122/585:0102-0475-0327:c:2/5 z:21/50 - u73122/585	28.61	0.891277
190406 Ctrl DMSO Inhibitor C1 DAPI C2 BF C3 Factin C4 Gata3 C5 Pard6.lif - ctrl/117:0274-0536-0590:c:4/5 z:55/66 - ctrl/117	25.58	1.0913		190406 Ctrl DMSO Inhibitor C1 DAPI C2 BF C3 Factin C4 Gata3 C5 Pard6.lif - DMSO control/120:0219-0837-0428:c:4/5 z:44/61 - DMSO control/120	17.9			220120 C1-PARD6B C2-GATA3 C3-DAPI BF C4-FACTIN 7.5uM U73122 treatment DMSO media ctrl.lif - DMSO/217:0207-0460-0700:c:2/5 z:44/99 - DMSO/217	46.26			190406 Ctrl DMSO Inhibitor C1 DAPI C2 BF C3 Factin C4 Gata3 C5 Pard6.lif - Inhibitor/101:0134-0529-0544:c:4/5 z:27/61 - Inhibitor/101	27.88			191228 DMSO and U73122 7.5uM C1-Factin C2-GATA3 C3- DAPI BF C4-PARD6B.lif - u73122/585:0102-0430-0345:c:2/5 z:21/50 - u73122/585	32.1
190406 Ctrl DMSO Inhibitor C1 DAPI C2 BF C3 Factin C4 Gata3 C5 Pard6.lif - ctrl/117:0274-0496-0647:c:4/5 z:55/66 - ctrl/117	23.44			190406 Ctrl DMSO Inhibitor C1 DAPI C2 BF C3 Factin C4 Gata3 C5 Pard6.lif - DMSO control/120:0184-0614-0457:c:4/5 z:37/61 - DMSO control/120	18.78	1		220120 C1-PARD6B C2-GATA3 C3-DAPI BF C4-FACTIN 7.5uM U73122 treatment DMSO media ctrl.lif - DMSO/217:0207-0319-0683:c:2/5 z:44/99 - DMSO/217	58.33	0.980666		190406 Ctrl DMSO Inhibitor C1 DAPI C2 BF C3 Factin C4 Gata3 C5 Pard6.lif - Inhibitor/101:0179-0675-0528:c:4/5 z:37/61 - Inhibitor/101	27.1	1.29479		191228 DMSO and U73122 7.5uM C1-Factin C2-GATA3 C3- DAPI BF C4-PARD6B.lif - u73122/585:0102-0505-0716:c:2/5 z:21/50 - u73122/585	26.02	0.800123
190406 Ctrl DMSO Inhibitor C1 DAPI C2 BF C3 Factin C4 Gata3 C5 Pard6.lif - ctrl/117:0274-0688-0565:c:4/5 z:55/66 - ctrl/117	22.27	0.986708		190406 Ctrl DMSO Inhibitor C1 DAPI C2 BF C3 Factin C4 Gata3 C5 Pard6.lif - DMSO control/120:0184-0562-0495:c:4/5 z:37/61 - DMSO control/120	18.78			220120 C1-PARD6B C2-GATA3 C3-DAPI BF C4-FACTIN 7.5uM U73122 treatment DMSO media ctrl.lif - DMSO/217:0207-0321-0736:c:2/5 z:44/99 - DMSO/217	59.48			190406 Ctrl DMSO Inhibitor C1 DAPI C2 BF C3 Factin C4 Gata3 C5 Pard6.lif - Inhibitor/101:0179-0605-0558:c:4/5 z:37/61 - Inhibitor/101	20.93			191228 DMSO and U73122 7.5uM C1-Factin C2-GATA3 C3- DAPI BF C4-PARD6B.lif - u73122/585:0102-0449-0739:c:2/5 z:21/50 - u73122/585	32.52
190406 Ctrl DMSO Inhibitor C1 DAPI C2 BF C3 Factin C4 Gata3 C5 Pard6.lif - ctrl/117:0274-0646-0614:c:4/5 z:55/66 - ctrl/117	22.57			Embryo 119				220120 C1-PARD6B C2-GATA3 C3-DAPI BF C4-FACTIN 7.5uM U73122 treatment DMSO media ctrl.lif - DMSO/217:0217-0506-0496:c:2/5 z:44/99 - DMSO/217	20.92	0.62616		190406 Ctrl DMSO Inhibitor C1 DAPI C2 BF C3 Factin C4 Gata3 C5 Pard6.lif - Inhibitor/101:0184-0499-0401:c:4/5 z:37/61 - Inhibitor/101	22.01	1.07734		191228 DMSO and U73122 7.5uM C1-Factin C2-GATA3 C3- DAPI BF C4-PARD6B.lif - u73122/585:0102-0554-0633:c:2/5 z:21/50 - u73122/585	21.88	0.993191
Embryo 116				190406 Ctrl DMSO Inhibitor C1 DAPI C2 BF C3 Factin C4 Gata3 C5 Pard6.lif - DMSO control/119:0179-0483-0765:c:4/5 z:38/61 - DMSO control/119	19.86	0.54756		220120 C1-PARD6B C2-GATA3 C3-DAPI BF C4-FACTIN 7.5uM U73122 treatment DMSO media ctrl.lif - DMSO/217:0217-0471-0513:c:2/5 z:44/99 - DMSO/217	33.41			190406 Ctrl DMSO Inhibitor C1 DAPI C2 BF C3 Factin C4 Gata3 C5 Pard6.lif - Inhibitor/101:0184-0497-0487:c:4/5 z:37/61 - Inhibitor/101	20.43			191228 DMSO and U73122 7.5uM C1-Factin C2-GATA3 C3- DAPI BF C4-PARD6B.lif - u73122/585:0102-0514-0610:c:2/5 z:21/50 - u73122/585	22.03
190406 Ctrl DMSO Inhibitor C1 DAPI C2 BF C3 Factin C4 Gata3 C5 Pard6.lif - ctrl/116:0234-0374-0417:c:4/5 z:47/66 - ctrl/116	28.93	1.50286		190406 Ctrl DMSO Inhibitor C1 DAPI C2 BF C3 Factin C4 Gata3 C5 Pard6.lif - DMSO control/119:0179-0408-0787:c:4/5 z:38/61 - DMSO control/119	36.27			220120 C1-PARD6B C2-GATA3 C3-DAPI BF C4-FACTIN 7.5uM U73122 treatment DMSO media ctrl.lif - DMSO/217:0217-0656-0735:c:2/5 z:44/99 - DMSO/217	55.31	1.48364		Embryo 100				191228 DMSO and U73122 7.5uM C1-Factin C2-GATA3 C3- DAPI BF C4-PARD6B.lif - u73122/585:0122-0691-0630:c:2/5 z:25/50 - u73122/585	20.54	0.959365
190406 Ctrl DMSO Inhibitor C1 DAPI C2 BF C3 Factin C4 Gata3 C5 Pard6.lif - ctrl/116:0234-0435-0517:c:4/5 z:47/66 - ctrl/116	19.25			190406 Ctrl DMSO Inhibitor C1 DAPI C2 BF C3 Factin C4 Gata3 C5 Pard6.lif - DMSO control/119:0179-0514-0429:c:4/5 z:38/61 - DMSO control/119	23.24	0.818598		220120 C1-PARD6B C2-GATA3 C3-DAPI BF C4-FACTIN 7.5uM U73122 treatment DMSO media ctrl.lif - DMSO/217:0217-0586-0733:c:2/5 z:44/99 - DMSO/217	37.28			190406 Ctrl DMSO Inhibitor C1 DAPI C2 BF C3 Factin C4 Gata3 C5 Pard6.lif - Inhibitor/100:0119-0467-0570:c:4/5 z:24/61 - Inhibitor/100	26.83	0.803293		191228 DMSO and U73122 7.5uM C1-Factin C2-GATA3 C3- DAPI BF C4-PARD6B.lif - u73122/585:0122-0631-0667:c:2/5 z:25/50 - u73122/585	21.41
190406 Ctrl DMSO Inhibitor C1 DAPI C2 BF C3 Factin C4 Gata3 C5 Pard6.lif - ctrl/116:0214-0463-0652:c:4/5 z:41/66 - ctrl/116	31.26	1.15692		190406 Ctrl DMSO Inhibitor C1 DAPI C2 BF C3 Factin C4 Gata3 C5 Pard6.lif - DMSO control/119:0179-0424-0448:c:4/5 z:38/61 - DMSO control/119	28.39			220120 C1-PARD6B C2-GATA3 C3-DAPI BF C4-FACTIN 7.5uM U73122 treatment DMSO media ctrl.lif - DMSO/217:0112-0605-0543:c:2/5 z:23/99 - DMSO/217	48.54	0.744479		190406 Ctrl DMSO Inhibitor C1 DAPI C2 BF C3 Factin C4 Gata3 C5 Pard6.lif - Inhibitor/100:0119-0389-0590:c:4/5 z:24/61 - Inhibitor/100	33.4			191228 DMSO and U73122 7.5uM C1-Factin C2-GATA3 C3- DAPI BF C4-PARD6B.lif - u73122/585:0122-0469-0337:c:2/5 z:25/50 - u73122/585	18.16	0.511117
190406 Ctrl DMSO Inhibitor C1 DAPI C2 BF C3 Factin C4 Gata3 C5 Pard6.lif - ctrl/116:0214-0410-0716:c:4/5 z:41/66 - ctrl/116	27.02			190406 Ctrl DMSO Inhibitor C1 DAPI C2 BF C3 Factin C4 Gata3 C5 Pard6.lif - DMSO control/119:0179-0350-0589:c:4/5 z:38/61 - DMSO control/119	29.65	0.822013		220120 C1-PARD6B C2-GATA3 C3-DAPI BF C4-FACTIN 7.5uM U73122 treatment DMSO media ctrl.lif - DMSO/217:0112-0673-0569:c:2/5 z:23/99 - DMSO/217	65.2			190406 Ctrl DMSO Inhibitor C1 DAPI C2 BF C3 Factin C4 Gata3 C5 Pard6.lif - Inhibitor/100:0119-0416-0393:c:4/5 z:24/61 - Inhibitor/100	35.07	0.986498		191228 DMSO and U73122 7.5uM C1-Factin C2-GATA3 C3- DAPI BF C4-PARD6B.lif - u73122/585:0122-0456-0276:c:2/5 z:25/50 - u73122/585	35.53
190406 Ctrl DMSO Inhibitor C1 DAPI C2 BF C3 Factin C4 Gata3 C5 Pard6.lif - ctrl/116:0214-0663-0576:c:4/5 z:41/66 - ctrl/116	18.53	0.770158		190406 Ctrl DMSO Inhibitor C1 DAPI C2 BF C3 Factin C4 Gata3 C5 Pard6.lif - DMSO control/119:0179-0337-0507:c:4/5 z:38/61 - DMSO control/119	36.07			Embryo 216				190406 Ctrl DMSO Inhibitor C1 DAPI C2 BF C3 Factin C4 Gata3 C5 Pard6.lif - Inhibitor/100:0119-0348-0413:c:4/5 z:24/61 - Inhibitor/100	35.55			191228 DMSO and U73122 7.5uM C1-Factin C2-GATA3 C3- DAPI BF C4-PARD6B.lif - u73122/585:0122-0355-0403:c:2/5 z:25/50 - u73122/585	16.69	0.535623
190406 Ctrl DMSO Inhibitor C1 DAPI C2 BF C3 Factin C4 Gata3 C5 Pard6.lif - ctrl/116:0214-0576-0534:c:4/5 z:41/66 - ctrl/116	24.06			190406 Ctrl DMSO Inhibitor C1 DAPI C2 BF C3 Factin C4 Gata3 C5 Pard6.lif - DMSO control/119:0224-0669-0667:c:4/5 z:45/61 - DMSO control/119	18.82	0.638182		220120 C1-PARD6B C2-GATA3 C3-DAPI BF C4-FACTIN 7.5uM U73122 treatment DMSO media ctrl.lif - DMSO/216:0132-0403-0479:c:2/5 z:27/85 - DMSO/216	75.62	1.43111		190406 Ctrl DMSO Inhibitor C1 DAPI C2 BF C3 Factin C4 Gata3 C5 Pard6.lif - Inhibitor/100:0104-0605-0479:c:4/5 z:21/61 - Inhibitor/100	39.35	1.49848		191228 DMSO and U73122 7.5uM C1-Factin C2-GATA3 C3- DAPI BF C4-PARD6B.lif - u73122/585:0122-0283-0390:c:2/5 z:25/50 - u73122/585	31.16
190406 Ctrl DMSO Inhibitor C1 DAPI C2 BF C3 Factin C4 Gata3 C5 Pard6.lif - ctrl/116:0144-0500-0462:c:4/5 z:29/66 - ctrl/116	25.91	0.790421		190406 Ctrl DMSO Inhibitor C1 DAPI C2 BF C3 Factin C4 Gata3 C5 Pard6.lif - DMSO control/119:0224-0703-0764:c:4/5 z:45/61 - DMSO control/119	29.49			220120 C1-PARD6B C2-GATA3 C3-DAPI BF C4-FACTIN 7.5uM U73122 treatment DMSO media ctrl.lif - DMSO/216:0132-0459-0475:c:2/5 z:27/85 - DMSO/216	52.84			190406 Ctrl DMSO Inhibitor C1 DAPI C2 BF C3 Factin C4 Gata3 C5 Pard6.lif - Inhibitor/100:0104-0562-0465:c:4/5 z:21/61 - Inhibitor/100	26.26			191228 DMSO and U73122 7.5uM C1-Factin C2-GATA3 C3- DAPI BF C4-PARD6B.lif - u73122/585:0122-0350-0622:c:2/5 z:25/50 - u73122/585	13.71	0.537015
190406 Ctrl DMSO Inhibitor C1 DAPI C2 BF C3 Factin C4 Gata3 C5 Pard6.lif - ctrl/116:0144-0508-0528:c:4/5 z:29/66 - ctrl/116	32.78			190406 Ctrl DMSO Inhibitor C1 DAPI C2 BF C3 Factin C4 Gata3 C5 Pard6.lif - DMSO control/119:0224-0702-0529:c:4/5 z:45/61 - DMSO control/119	19.16	0.861898		220120 C1-PARD6B C2-GATA3 C3-DAPI BF C4-FACTIN 7.5uM U73122 treatment DMSO media ctrl.lif - DMSO/216:0132-0478-0412:c:2/5 z:27/85 - DMSO/216	90.02	1.71336		190406 Ctrl DMSO Inhibitor C1 DAPI C2 BF C3 Factin C4 Gata3 C5 Pard6.lif - Inhibitor/100:0184-0409-0313:c:4/5 z:37/61 - Inhibitor/100	29.57	1.75594		191228 DMSO and U73122 7.5uM C1-Factin C2-GATA3 C3- DAPI BF C4-PARD6B.lif - u73122/585:0122-0308-0680:c:2/5 z:25/50 - u73122/585	25.53
190406 Ctrl DMSO Inhibitor C1 DAPI C2 BF C3 Factin C4 Gata3 C5 Pard6.lif - ctrl/116:0164-0647-0369:c:4/5 z:33/66 - ctrl/116	24.19	0.847879		190406 Ctrl DMSO Inhibitor C1 DAPI C2 BF C3 Factin C4 Gata3 C5 Pard6.lif - DMSO control/119:0224-0719-0586:c:4/5 z:45/61 - DMSO control/119	22.23			220120 C1-PARD6B C2-GATA3 C3-DAPI BF C4-FACTIN 7.5uM U73122 treatment DMSO media ctrl.lif - DMSO/216:0132-0531-0393:c:2/5 z:27/85 - DMSO/216	52.54			190406 Ctrl DMSO Inhibitor C1 DAPI C2 BF C3 Factin C4 Gata3 C5 Pard6.lif - Inhibitor/100:0184-0501-0296:c:4/5 z:37/61 - Inhibitor/100	16.84			Embryo 580
190406 Ctrl DMSO Inhibitor C1 DAPI C2 BF C3 Factin C4 Gata3 C5 Pard6.lif - ctrl/116:0164-0607-0460:c:4/5 z:33/66 - ctrl/116	28.53			190406 Ctrl DMSO Inhibitor C1 DAPI C2 BF C3 Factin C4 Gata3 C5 Pard6.lif - DMSO control/119:0224-0337-0536:c:4/5 z:45/61 - DMSO control/119	23.75	0.695461		220120 C1-PARD6B C2-GATA3 C3-DAPI BF C4-FACTIN 7.5uM U73122 treatment DMSO media ctrl.lif - DMSO/216:0132-0705-0614:c:2/5 z:27/85 - DMSO/216	80.56	2.50186		190406 Ctrl DMSO Inhibitor C1 DAPI C2 BF C3 Factin C4 Gata3 C5 Pard6.lif - Inhibitor/100:0184-0405-0472:c:4/5 z:37/61 - Inhibitor/100	24.86	1.33728		191228 DMSO and U73122 7.5uM C1-Factin C2-GATA3 C3- DAPI BF C4-PARD6B.lif - u73122/580:0107-0477-0362:c:2/5 z:22/56 - u73122/580	38.64	1.75716
Embryo 112				190406 Ctrl DMSO Inhibitor C1 DAPI C2 BF C3 Factin C4 Gata3 C5 Pard6.lif - DMSO control/119:0224-0279-0555:c:4/5 z:45/61 - DMSO control/119	34.15			220120 C1-PARD6B C2-GATA3 C3-DAPI BF C4-FACTIN 7.5uM U73122 treatment DMSO media ctrl.lif - DMSO/216:0132-0698-0656:c:2/5 z:27/85 - DMSO/216	32.2			190406 Ctrl DMSO Inhibitor C1 DAPI C2 BF C3 Factin C4 Gata3 C5 Pard6.lif - Inhibitor/100:0184-0355-0511:c:4/5 z:37/61 - Inhibitor/100	18.59			191228 DMSO and U73122 7.5uM C1-Factin C2-GATA3 C3- DAPI BF C4-PARD6B.lif - u73122/580:0107-0415-0403:c:2/5 z:22/56 - u73122/580	21.99
190406 Ctrl DMSO Inhibitor C1 DAPI C2 BF C3 Factin C4 Gata3 C5 Pard6.lif - ctrl/112:0189-0390-0332:c:4/5 z:38/66 - ctrl/112	68	2.27729						220120 C1-PARD6B C2-GATA3 C3-DAPI BF C4-FACTIN 7.5uM U73122 treatment DMSO media ctrl.lif - DMSO/216:0097-0632-0595:c:2/5 z:19/85 - DMSO/216	110.56	2.04438		Embryo 99				191228 DMSO and U73122 7.5uM C1-Factin C2-GATA3 C3- DAPI BF C4-PARD6B.lif - u73122/580:0107-0432-0638:c:2/5 z:22/56 - u73122/580	24.72	0.971316
190406 Ctrl DMSO Inhibitor C1 DAPI C2 BF C3 Factin C4 Gata3 C5 Pard6.lif - ctrl/112:0189-0333-0351:c:4/5 z:38/66 - ctrl/112	29.86							220120 C1-PARD6B C2-GATA3 C3-DAPI BF C4-FACTIN 7.5uM U73122 treatment DMSO media ctrl.lif - DMSO/216:0097-0587-0590:c:2/5 z:19/85 - DMSO/216	54.08			190406 Ctrl DMSO Inhibitor C1 DAPI C2 BF C3 Factin C4 Gata3 C5 Pard6.lif - Inhibitor/99:0144-0475-0672:c:4/5 z:29/61 - Inhibitor/99	31.24	1.09231		191228 DMSO and U73122 7.5uM C1-Factin C2-GATA3 C3- DAPI BF C4-PARD6B.lif - u73122/580:0107-0393-0628:c:2/5 z:22/56 - u73122/580	25.45
190406 Ctrl DMSO Inhibitor C1 DAPI C2 BF C3 Factin C4 Gata3 C5 Pard6.lif - ctrl/112:0189-0162-0483:c:4/5 z:38/66 - ctrl/112	99.11	2.74847						220120 C1-PARD6B C2-GATA3 C3-DAPI BF C4-FACTIN 7.5uM U73122 treatment DMSO media ctrl.lif - DMSO/216:0227-0354-0527:c:2/5 z:46/85 - DMSO/216	29.8	0.689655		190406 Ctrl DMSO Inhibitor C1 DAPI C2 BF C3 Factin C4 Gata3 C5 Pard6.lif - Inhibitor/99:0144-0394-0691:c:4/5 z:29/61 - Inhibitor/99	28.6			191228 DMSO and U73122 7.5uM C1-Factin C2-GATA3 C3- DAPI BF C4-PARD6B.lif - u73122/580:0107-0396-0525:c:2/5 z:22/56 - u73122/580	21.48	0.859544
190406 Ctrl DMSO Inhibitor C1 DAPI C2 BF C3 Factin C4 Gata3 C5 Pard6.lif - ctrl/112:0189-0132-0540:c:4/5 z:38/66 - ctrl/112	36.06							220120 C1-PARD6B C2-GATA3 C3-DAPI BF C4-FACTIN 7.5uM U73122 treatment DMSO media ctrl.lif - DMSO/216:0227-0387-0477:c:2/5 z:46/85 - DMSO/216	43.21			190406 Ctrl DMSO Inhibitor C1 DAPI C2 BF C3 Factin C4 Gata3 C5 Pard6.lif - Inhibitor/99:0164-0273-0680:c:4/5 z:33/61 - Inhibitor/99	29.18	0.820124		191228 DMSO and U73122 7.5uM C1-Factin C2-GATA3 C3- DAPI BF C4-PARD6B.lif - u73122/580:0107-0365-0577:c:2/5 z:22/56 - u73122/580	24.99
190406 Ctrl DMSO Inhibitor C1 DAPI C2 BF C3 Factin C4 Gata3 C5 Pard6.lif - ctrl/112:0189-0554-0480:c:4/5 z:38/66 - ctrl/112	56.78	2.17965						220120 C1-PARD6B C2-GATA3 C3-DAPI BF C4-FACTIN 7.5uM U73122 treatment DMSO media ctrl.lif - DMSO/216:0227-0486-0474:c:2/5 z:46/85 - DMSO/216	42.61	0.930959		190406 Ctrl DMSO Inhibitor C1 DAPI C2 BF C3 Factin C4 Gata3 C5 Pard6.lif - Inhibitor/99:0164-0249-0735:c:4/5 z:33/61 - Inhibitor/99	35.58			191228 DMSO and U73122 7.5uM C1-Factin C2-GATA3 C3- DAPI BF C4-PARD6B.lif - u73122/580:0107-0492-0504:c:2/5 z:22/56 - u73122/580	15.13	0.939752
190406 Ctrl DMSO Inhibitor C1 DAPI C2 BF C3 Factin C4 Gata3 C5 Pard6.lif - ctrl/112:0189-0556-0540:c:4/5 z:38/66 - ctrl/112	26.05							220120 C1-PARD6B C2-GATA3 C3-DAPI BF C4-FACTIN 7.5uM U73122 treatment DMSO media ctrl.lif - DMSO/216:0227-0453-0424:c:2/5 z:46/85 - DMSO/216	45.77			190406 Ctrl DMSO Inhibitor C1 DAPI C2 BF C3 Factin C4 Gata3 C5 Pard6.lif - Inhibitor/99:0164-0490-0663:c:4/5 z:33/61 - Inhibitor/99	28.3	1.04121		191228 DMSO and U73122 7.5uM C1-Factin C2-GATA3 C3- DAPI BF C4-PARD6B.lif - u73122/580:0107-0444-0462:c:2/5 z:22/56 - u73122/580	16.1
190406 Ctrl DMSO Inhibitor C1 DAPI C2 BF C3 Factin C4 Gata3 C5 Pard6.lif - ctrl/112:0154-0291-0580:c:4/5 z:31/66 - ctrl/112	48.32	1.61876						220120 C1-PARD6B C2-GATA3 C3-DAPI BF C4-FACTIN 7.5uM U73122 treatment DMSO media ctrl.lif - DMSO/216:0227-0427-0636:c:2/5 z:46/85 - DMSO/216	37.2	0.948254		190406 Ctrl DMSO Inhibitor C1 DAPI C2 BF C3 Factin C4 Gata3 C5 Pard6.lif - Inhibitor/99:0164-0465-0717:c:4/5 z:33/61 - Inhibitor/99	27.18			191228 DMSO and U73122 7.5uM C1-Factin C2-GATA3 C3- DAPI BF C4-PARD6B.lif - u73122/580:0107-0562-0576:c:2/5 z:22/56 - u73122/580	11.47	0.765688
190406 Ctrl DMSO Inhibitor C1 DAPI C2 BF C3 Factin C4 Gata3 C5 Pard6.lif - ctrl/112:0154-0345-0544:c:4/5 z:31/66 - ctrl/112	29.85							220120 C1-PARD6B C2-GATA3 C3-DAPI BF C4-FACTIN 7.5uM U73122 treatment DMSO media ctrl.lif - DMSO/216:0227-0402-0614:c:2/5 z:46/85 - DMSO/216	39.23			190406 Ctrl DMSO Inhibitor C1 DAPI C2 BF C3 Factin C4 Gata3 C5 Pard6.lif - Inhibitor/99:0164-0248-0467:c:4/5 z:33/61 - Inhibitor/99	29.83	0.901753		191228 DMSO and U73122 7.5uM C1-Factin C2-GATA3 C3- DAPI BF C4-PARD6B.lif - u73122/580:0107-0519-0589:c:2/5 z:22/56 - u73122/580	14.98
190406 Ctrl DMSO Inhibitor C1 DAPI C2 BF C3 Factin C4 Gata3 C5 Pard6.lif - ctrl/112:0199-0224-0317:c:4/5 z:40/66 - ctrl/112	71.61	2.17395						220120 C1-PARD6B C2-GATA3 C3-DAPI BF C4-FACTIN 7.5uM U73122 treatment DMSO media ctrl.lif - DMSO/216:0227-0531-0700:c:2/5 z:46/85 - DMSO/216	40.78	1.05757		190406 Ctrl DMSO Inhibitor C1 DAPI C2 BF C3 Factin C4 Gata3 C5 Pard6.lif - Inhibitor/99:0164-0191-0509:c:4/5 z:33/61 - Inhibitor/99	33.08			191228 DMSO and U73122 7.5uM C1-Factin C2-GATA3 C3- DAPI BF C4-PARD6B.lif - u73122/580:0107-0728-0674:c:2/5 z:22/56 - u73122/580	22.22	1.31948
190406 Ctrl DMSO Inhibitor C1 DAPI C2 BF C3 Factin C4 Gata3 C5 Pard6.lif - ctrl/112:0199-0179-0363:c:4/5 z:40/66 - ctrl/112	32.94							220120 C1-PARD6B C2-GATA3 C3-DAPI BF C4-FACTIN 7.5uM U73122 treatment DMSO media ctrl.lif - DMSO/216:0227-0512-0665:c:2/5 z:46/85 - DMSO/216	38.56			190406 Ctrl DMSO Inhibitor C1 DAPI C2 BF C3 Factin C4 Gata3 C5 Pard6.lif - Inhibitor/99:0114-0405-0315:c:4/5 z:22/61 - Inhibitor/99	34.66	0.892609		191228 DMSO and U73122 7.5uM C1-Factin C2-GATA3 C3- DAPI BF C4-PARD6B.lif - u73122/580:0107-0647-0675:c:2/5 z:22/56 - u73122/580	16.84
Embryo 111								220120 C1-PARD6B C2-GATA3 C3-DAPI BF C4-FACTIN 7.5uM U73122 treatment DMSO media ctrl.lif - DMSO/216:0227-0674-0661:c:2/5 z:46/85 - DMSO/216	35.35	0.974635		190406 Ctrl DMSO Inhibitor C1 DAPI C2 BF C3 Factin C4 Gata3 C5 Pard6.lif - Inhibitor/99:0114-0348-0302:c:4/5 z:22/61 - Inhibitor/99	38.83			191228 DMSO and U73122 7.5uM C1-Factin C2-GATA3 C3- DAPI BF C4-PARD6B.lif - u73122/580:0107-0757-0579:c:2/5 z:22/56 - u73122/580	23.99	1.30098
190406 Ctrl DMSO Inhibitor C1 DAPI C2 BF C3 Factin C4 Gata3 C5 Pard6.lif - ctrl/111:0169-0306-0269:c:4/5 z:34/66 - ctrl/111	57.03	1.88404						220120 C1-PARD6B C2-GATA3 C3-DAPI BF C4-FACTIN 7.5uM U73122 treatment DMSO media ctrl.lif - DMSO/216:0227-0649-0604:c:2/5 z:46/85 - DMSO/216	36.27			190406 Ctrl DMSO Inhibitor C1 DAPI C2 BF C3 Factin C4 Gata3 C5 Pard6.lif - Inhibitor/99:0109-0437-0463:c:4/5 z:22/61 - Inhibitor/99	35.45	1.41914		191228 DMSO and U73122 7.5uM C1-Factin C2-GATA3 C3- DAPI BF C4-PARD6B.lif - u73122/580:0107-0711-0591:c:2/5 z:22/56 - u73122/580	18.44
190406 Ctrl DMSO Inhibitor C1 DAPI C2 BF C3 Factin C4 Gata3 C5 Pard6.lif - ctrl/111:0169-0241-0275:c:4/5 z:34/66 - ctrl/111	30.27							Embryo 214				190406 Ctrl DMSO Inhibitor C1 DAPI C2 BF C3 Factin C4 Gata3 C5 Pard6.lif - Inhibitor/99:0109-0381-0517:c:4/5 z:22/61 - Inhibitor/99	24.98			Embryo 200
190406 Ctrl DMSO Inhibitor C1 DAPI C2 BF C3 Factin C4 Gata3 C5 Pard6.lif - ctrl/111:0169-0281-0725:c:4/5 z:34/66 - ctrl/111	50.11	1.58576						220120 C1-PARD6B C2-GATA3 C3-DAPI BF C4-FACTIN 7.5uM U73122 treatment DMSO media ctrl.lif - DMSO/214:0112-0430-0708:c:2/5 z:23/104 - DMSO/214	230.51	4.04688		Embryo 98				220120 C1-PARD6B C2-GATA3 C3-DAPI BF C4-FACTIN 7.5uM U73122 treatment DMSO media ctrl.lif - U73122 7.5uM/200:0112-0416-0375:c:2/5 z:23/76 - U73122 7.5uM/200	35.99	0.708883
190406 Ctrl DMSO Inhibitor C1 DAPI C2 BF C3 Factin C4 Gata3 C5 Pard6.lif - ctrl/111:0169-0210-0720:c:4/5 z:34/66 - ctrl/111	31.6							220120 C1-PARD6B C2-GATA3 C3-DAPI BF C4-FACTIN 7.5uM U73122 treatment DMSO media ctrl.lif - DMSO/214:0112-0381-0714:c:2/5 z:23/104 - DMSO/214	56.96			190406 Ctrl DMSO Inhibitor C1 DAPI C2 BF C3 Factin C4 Gata3 C5 Pard6.lif - Inhibitor/98:0139-0818-0382:c:4/5 z:27/61 - Inhibitor/98	66.41	2.65428		220120 C1-PARD6B C2-GATA3 C3-DAPI BF C4-FACTIN 7.5uM U73122 treatment DMSO media ctrl.lif - U73122 7.5uM/200:0112-0446-0448:c:2/5 z:23/76 - U73122 7.5uM/200	50.77
190406 Ctrl DMSO Inhibitor C1 DAPI C2 BF C3 Factin C4 Gata3 C5 Pard6.lif - ctrl/111:0184-0159-0348:c:4/5 z:37/66 - ctrl/111	51.04	2.37065						220120 C1-PARD6B C2-GATA3 C3-DAPI BF C4-FACTIN 7.5uM U73122 treatment DMSO media ctrl.lif - DMSO/214:0112-0391-0572:c:2/5 z:23/104 - DMSO/214	123.23	2.38772		190406 Ctrl DMSO Inhibitor C1 DAPI C2 BF C3 Factin C4 Gata3 C5 Pard6.lif - Inhibitor/98:0139-0742-0407:c:4/5 z:27/61 - Inhibitor/98	25.02			220120 C1-PARD6B C2-GATA3 C3-DAPI BF C4-FACTIN 7.5uM U73122 treatment DMSO media ctrl.lif - U73122 7.5uM/200:0137-0315-0498:c:2/5 z:28/76 - U73122 7.5uM/200	29.02	0.571823
190406 Ctrl DMSO Inhibitor C1 DAPI C2 BF C3 Factin C4 Gata3 C5 Pard6.lif - ctrl/111:0184-0138-0401:c:4/5 z:37/66 - ctrl/111	21.53							220120 C1-PARD6B C2-GATA3 C3-DAPI BF C4-FACTIN 7.5uM U73122 treatment DMSO media ctrl.lif - DMSO/214:0112-0430-0538:c:2/5 z:23/104 - DMSO/214	51.61			190406 Ctrl DMSO Inhibitor C1 DAPI C2 BF C3 Factin C4 Gata3 C5 Pard6.lif - Inhibitor/98:0139-0872-0479:c:4/5 z:27/61 - Inhibitor/98	38.77	1.39561		220120 C1-PARD6B C2-GATA3 C3-DAPI BF C4-FACTIN 7.5uM U73122 treatment DMSO media ctrl.lif - U73122 7.5uM/200:0137-0262-0521:c:2/5 z:28/76 - U73122 7.5uM/200	50.75
190406 Ctrl DMSO Inhibitor C1 DAPI C2 BF C3 Factin C4 Gata3 C5 Pard6.lif - ctrl/111:0139-0189-0549:c:4/5 z:28/66 - ctrl/111	100.89	3.34294						220120 C1-PARD6B C2-GATA3 C3-DAPI BF C4-FACTIN 7.5uM U73122 treatment DMSO media ctrl.lif - DMSO/214:0112-0484-0568:c:2/5 z:23/104 - DMSO/214	110.22	2.68764		190406 Ctrl DMSO Inhibitor C1 DAPI C2 BF C3 Factin C4 Gata3 C5 Pard6.lif - Inhibitor/98:0139-0851-0547:c:4/5 z:27/61 - Inhibitor/98	27.78			220120 C1-PARD6B C2-GATA3 C3-DAPI BF C4-FACTIN 7.5uM U73122 treatment DMSO media ctrl.lif - U73122 7.5uM/200:0137-0591-0469:c:2/5 z:28/76 - U73122 7.5uM/200	41.14	0.777988
190406 Ctrl DMSO Inhibitor C1 DAPI C2 BF C3 Factin C4 Gata3 C5 Pard6.lif - ctrl/111:0139-0168-0606:c:4/5 z:28/66 - ctrl/111	30.18							220120 C1-PARD6B C2-GATA3 C3-DAPI BF C4-FACTIN 7.5uM U73122 treatment DMSO media ctrl.lif - DMSO/214:0112-0536-0579:c:2/5 z:23/104 - DMSO/214	41.01			190406 Ctrl DMSO Inhibitor C1 DAPI C2 BF C3 Factin C4 Gata3 C5 Pard6.lif - Inhibitor/98:0154-0449-0595:c:4/5 z:31/61 - Inhibitor/98	58.53	1.20855		220120 C1-PARD6B C2-GATA3 C3-DAPI BF C4-FACTIN 7.5uM U73122 treatment DMSO media ctrl.lif - U73122 7.5uM/200:0137-0668-0494:c:2/5 z:28/76 - U73122 7.5uM/200	52.88
190406 Ctrl DMSO Inhibitor C1 DAPI C2 BF C3 Factin C4 Gata3 C5 Pard6.lif - ctrl/111:0139-0191-0412:c:4/5 z:28/66 - ctrl/111	71.65	2.58851						220120 C1-PARD6B C2-GATA3 C3-DAPI BF C4-FACTIN 7.5uM U73122 treatment DMSO media ctrl.lif - DMSO/214:0112-0503-0508:c:2/5 z:23/104 - DMSO/214	156.71	3.16586		190406 Ctrl DMSO Inhibitor C1 DAPI C2 BF C3 Factin C4 Gata3 C5 Pard6.lif - Inhibitor/98:0154-0457-0656:c:4/5 z:31/61 - Inhibitor/98	48.43			220120 C1-PARD6B C2-GATA3 C3-DAPI BF C4-FACTIN 7.5uM U73122 treatment DMSO media ctrl.lif - U73122 7.5uM/200:0137-0494-0651:c:2/5 z:28/76 - U73122 7.5uM/200	39.31	0.871425
190406 Ctrl DMSO Inhibitor C1 DAPI C2 BF C3 Factin C4 Gata3 C5 Pard6.lif - ctrl/111:0139-0149-0433:c:4/5 z:28/66 - ctrl/111	27.68							220120 C1-PARD6B C2-GATA3 C3-DAPI BF C4-FACTIN 7.5uM U73122 treatment DMSO media ctrl.lif - DMSO/214:0112-0543-0505:c:2/5 z:23/104 - DMSO/214	49.5			190406 Ctrl DMSO Inhibitor C1 DAPI C2 BF C3 Factin C4 Gata3 C5 Pard6.lif - Inhibitor/98:0154-0870-0486:c:4/5 z:31/61 - Inhibitor/98	51.2	1.92554		220120 C1-PARD6B C2-GATA3 C3-DAPI BF C4-FACTIN 7.5uM U73122 treatment DMSO media ctrl.lif - U73122 7.5uM/200:0137-0495-0716:c:2/5 z:28/76 - U73122 7.5uM/200	45.11
190406 Ctrl DMSO Inhibitor C1 DAPI C2 BF C3 Factin C4 Gata3 C5 Pard6.lif - ctrl/111:0139-0375-0588:c:4/5 z:28/66 - ctrl/111	83.99	2.90021						220120 C1-PARD6B C2-GATA3 C3-DAPI BF C4-FACTIN 7.5uM U73122 treatment DMSO media ctrl.lif - DMSO/214:0112-0590-0593:c:2/5 z:23/104 - DMSO/214	110.69	1.71719		190406 Ctrl DMSO Inhibitor C1 DAPI C2 BF C3 Factin C4 Gata3 C5 Pard6.lif - Inhibitor/98:0154-0849-0540:c:4/5 z:31/61 - Inhibitor/98	26.59			220120 C1-PARD6B C2-GATA3 C3-DAPI BF C4-FACTIN 7.5uM U73122 treatment DMSO media ctrl.lif - U73122 7.5uM/200:0202-0390-0632:c:2/5 z:43/76 - U73122 7.5uM/200	27.78	0.928166
190406 Ctrl DMSO Inhibitor C1 DAPI C2 BF C3 Factin C4 Gata3 C5 Pard6.lif - ctrl/111:0139-0403-0654:c:4/5 z:28/66 - ctrl/111	28.96							220120 C1-PARD6B C2-GATA3 C3-DAPI BF C4-FACTIN 7.5uM U73122 treatment DMSO media ctrl.lif - DMSO/214:0112-0582-0616:c:2/5 z:23/104 - DMSO/214	64.46			190406 Ctrl DMSO Inhibitor C1 DAPI C2 BF C3 Factin C4 Gata3 C5 Pard6.lif - Inhibitor/98:0154-0745-0400:c:4/5 z:31/61 - Inhibitor/98	28.32	1.53496		220120 C1-PARD6B C2-GATA3 C3-DAPI BF C4-FACTIN 7.5uM U73122 treatment DMSO media ctrl.lif - U73122 7.5uM/200:0202-0340-0591:c:2/5 z:43/76 - U73122 7.5uM/200	29.93
190406 Ctrl DMSO Inhibitor C1 DAPI C2 BF C3 Factin C4 Gata3 C5 Pard6.lif - ctrl/111:0139-0540-0514:c:4/5 z:28/66 - ctrl/111	57.55	1.44962						220120 C1-PARD6B C2-GATA3 C3-DAPI BF C4-FACTIN 7.5uM U73122 treatment DMSO media ctrl.lif - DMSO/214:0107-0506-0692:c:2/5 z:18/104 - DMSO/214	85.62	1.58087		190406 Ctrl DMSO Inhibitor C1 DAPI C2 BF C3 Factin C4 Gata3 C5 Pard6.lif - Inhibitor/98:0154-0778-0446:c:4/5 z:31/61 - Inhibitor/98	18.45			220120 C1-PARD6B C2-GATA3 C3-DAPI BF C4-FACTIN 7.5uM U73122 treatment DMSO media ctrl.lif - U73122 7.5uM/200:0212-0573-0417:c:2/5 z:43/76 - U73122 7.5uM/200	31.26	0.755803
190406 Ctrl DMSO Inhibitor C1 DAPI C2 BF C3 Factin C4 Gata3 C5 Pard6.lif - ctrl/111:0139-0542-0573:c:4/5 z:28/66 - ctrl/111	39.7							220120 C1-PARD6B C2-GATA3 C3-DAPI BF C4-FACTIN 7.5uM U73122 treatment DMSO media ctrl.lif - DMSO/214:0107-0549-0654:c:2/5 z:18/104 - DMSO/214	54.16			190406 Ctrl DMSO Inhibitor C1 DAPI C2 BF C3 Factin C4 Gata3 C5 Pard6.lif - Inhibitor/98:0214-0873-0516:c:4/5 z:44/61 - Inhibitor/98	23.99	1.42968		220120 C1-PARD6B C2-GATA3 C3-DAPI BF C4-FACTIN 7.5uM U73122 treatment DMSO media ctrl.lif - U73122 7.5uM/200:0212-0587-0477:c:2/5 z:43/76 - U73122 7.5uM/200	41.36
190406 Ctrl DMSO Inhibitor C1 DAPI C2 BF C3 Factin C4 Gata3 C5 Pard6.lif - ctrl/111:0204-0342-0372:c:4/5 z:41/66 - ctrl/111	38.6	2.34223						220120 C1-PARD6B C2-GATA3 C3-DAPI BF C4-FACTIN 7.5uM U73122 treatment DMSO media ctrl.lif - DMSO/214:0132-0660-0549:c:2/5 z:29/104 - DMSO/214	84.81	2.33059		190406 Ctrl DMSO Inhibitor C1 DAPI C2 BF C3 Factin C4 Gata3 C5 Pard6.lif - Inhibitor/98:0214-0817-0537:c:4/5 z:44/61 - Inhibitor/98	16.78			Embryo 198
190406 Ctrl DMSO Inhibitor C1 DAPI C2 BF C3 Factin C4 Gata3 C5 Pard6.lif - ctrl/111:0204-0298-0376:c:4/5 z:41/66 - ctrl/111	16.48							220120 C1-PARD6B C2-GATA3 C3-DAPI BF C4-FACTIN 7.5uM U73122 treatment DMSO media ctrl.lif - DMSO/214:0132-0661-0604:c:2/5 z:29/104 - DMSO/214	36.39			190406 Ctrl DMSO Inhibitor C1 DAPI C2 BF C3 Factin C4 Gata3 C5 Pard6.lif - Inhibitor/98:0114-0804-0381:c:4/5 z:23/61 - Inhibitor/98	67.63	2.33771		220120 C1-PARD6B C2-GATA3 C3-DAPI BF C4-FACTIN 7.5uM U73122 treatment DMSO media ctrl.lif - U73122 7.5uM/198:0187-0562-0306:c:2/5 z:38/77 - U73122 7.5uM/198	39.55	0.744401
190406 Ctrl DMSO Inhibitor C1 DAPI C2 BF C3 Factin C4 Gata3 C5 Pard6.lif - ctrl/111:0194-0165-0341:c:4/5 z:39/66 - ctrl/111	51.55	2.32312						220120 C1-PARD6B C2-GATA3 C3-DAPI BF C4-FACTIN 7.5uM U73122 treatment DMSO media ctrl.lif - DMSO/214:0132-0600-0492:c:2/5 z:29/104 - DMSO/214	143.24	3.16483		190406 Ctrl DMSO Inhibitor C1 DAPI C2 BF C3 Factin C4 Gata3 C5 Pard6.lif - Inhibitor/98:0114-0766-0441:c:4/5 z:23/61 - Inhibitor/98	28.93			220120 C1-PARD6B C2-GATA3 C3-DAPI BF C4-FACTIN 7.5uM U73122 treatment DMSO media ctrl.lif - U73122 7.5uM/198:0187-0524-0355:c:2/5 z:38/77 - U73122 7.5uM/198	53.13
190406 Ctrl DMSO Inhibitor C1 DAPI C2 BF C3 Factin C4 Gata3 C5 Pard6.lif - ctrl/111:0194-0162-0406:c:4/5 z:39/66 - ctrl/111	22.19							220120 C1-PARD6B C2-GATA3 C3-DAPI BF C4-FACTIN 7.5uM U73122 treatment DMSO media ctrl.lif - DMSO/214:0132-0595-0526:c:2/5 z:29/104 - DMSO/214	45.26			190406 Ctrl DMSO Inhibitor C1 DAPI C2 BF C3 Factin C4 Gata3 C5 Pard6.lif - Inhibitor/98:0114-0698-0613:c:4/5 z:23/61 - Inhibitor/98	54.27	1.41845		220120 C1-PARD6B C2-GATA3 C3-DAPI BF C4-FACTIN 7.5uM U73122 treatment DMSO media ctrl.lif - U73122 7.5uM/198:0187-0404-0540:c:2/5 z:38/77 - U73122 7.5uM/198	44.93	0.993148
Embryo 110								220120 C1-PARD6B C2-GATA3 C3-DAPI BF C4-FACTIN 7.5uM U73122 treatment DMSO media ctrl.lif - DMSO/214:0132-0504-0513:c:2/5 z:29/104 - DMSO/214	135.85	3.67659		190406 Ctrl DMSO Inhibitor C1 DAPI C2 BF C3 Factin C4 Gata3 C5 Pard6.lif - Inhibitor/98:0114-0707-0689:c:4/5 z:23/61 - Inhibitor/98	38.26			220120 C1-PARD6B C2-GATA3 C3-DAPI BF C4-FACTIN 7.5uM U73122 treatment DMSO media ctrl.lif - U73122 7.5uM/198:0187-0448-0602:c:2/5 z:38/77 - U73122 7.5uM/198	45.24
190406 Ctrl DMSO Inhibitor C1 DAPI C2 BF C3 Factin C4 Gata3 C5 Pard6.lif - ctrl/110:0209-0467-0541:c:4/5 z:44/66 - ctrl/110	34.09	1.36908						220120 C1-PARD6B C2-GATA3 C3-DAPI BF C4-FACTIN 7.5uM U73122 treatment DMSO media ctrl.lif - DMSO/214:0132-0469-0490:c:2/5 z:29/104 - DMSO/214	36.95			Embryo 96				220120 C1-PARD6B C2-GATA3 C3-DAPI BF C4-FACTIN 7.5uM U73122 treatment DMSO media ctrl.lif - U73122 7.5uM/198:0127-0553-0474:c:2/5 z:26/77 - U73122 7.5uM/198	49.67	0.827557
190406 Ctrl DMSO Inhibitor C1 DAPI C2 BF C3 Factin C4 Gata3 C5 Pard6.lif - ctrl/110:0209-0414-0584:c:4/5 z:44/66 - ctrl/110	24.9							220120 C1-PARD6B C2-GATA3 C3-DAPI BF C4-FACTIN 7.5uM U73122 treatment DMSO media ctrl.lif - DMSO/214:0132-0398-0577:c:2/5 z:29/104 - DMSO/214	80.26	3.35395		190406 Ctrl DMSO Inhibitor C1 DAPI C2 BF C3 Factin C4 Gata3 C5 Pard6.lif - Inhibitor/96:0199-0627-0490:c:4/5 z:40/61 - Inhibitor/96	25.56	1.39216		220120 C1-PARD6B C2-GATA3 C3-DAPI BF C4-FACTIN 7.5uM U73122 treatment DMSO media ctrl.lif - U73122 7.5uM/198:0127-0501-0468:c:2/5 z:26/77 - U73122 7.5uM/198	60.02
190406 Ctrl DMSO Inhibitor C1 DAPI C2 BF C3 Factin C4 Gata3 C5 Pard6.lif - ctrl/110:0209-0482-0412:c:4/5 z:44/66 - ctrl/110	35.74	1.4793						220120 C1-PARD6B C2-GATA3 C3-DAPI BF C4-FACTIN 7.5uM U73122 treatment DMSO media ctrl.lif - DMSO/214:0132-0428-0550:c:2/5 z:29/104 - DMSO/214	23.93			190406 Ctrl DMSO Inhibitor C1 DAPI C2 BF C3 Factin C4 Gata3 C5 Pard6.lif - Inhibitor/96:0199-0543-0474:c:4/5 z:40/61 - Inhibitor/96	18.36			220120 C1-PARD6B C2-GATA3 C3-DAPI BF C4-FACTIN 7.5uM U73122 treatment DMSO media ctrl.lif - U73122 7.5uM/198:0222-0427-0434:c:2/5 z:44/77 - U73122 7.5uM/198	33.18	0.76434
190406 Ctrl DMSO Inhibitor C1 DAPI C2 BF C3 Factin C4 Gata3 C5 Pard6.lif - ctrl/110:0209-0440-0465:c:4/5 z:44/66 - ctrl/110	24.16							220120 C1-PARD6B C2-GATA3 C3-DAPI BF C4-FACTIN 7.5uM U73122 treatment DMSO media ctrl.lif - DMSO/214:0132-0439-0715:c:2/5 z:29/104 - DMSO/214	122.81	2.87611		190406 Ctrl DMSO Inhibitor C1 DAPI C2 BF C3 Factin C4 Gata3 C5 Pard6.lif - Inhibitor/96:0200-0599-0348:c:5/5 z:40/61 - Inhibitor/96	19.39	1.13724		220120 C1-PARD6B C2-GATA3 C3-DAPI BF C4-FACTIN 7.5uM U73122 treatment DMSO media ctrl.lif - U73122 7.5uM/198:0222-0371-0459:c:2/5 z:44/77 - U73122 7.5uM/198	43.41
190406 Ctrl DMSO Inhibitor C1 DAPI C2 BF C3 Factin C4 Gata3 C5 Pard6.lif - ctrl/110:0209-0645-0682:c:4/5 z:44/66 - ctrl/110	38.62	1.49574						220120 C1-PARD6B C2-GATA3 C3-DAPI BF C4-FACTIN 7.5uM U73122 treatment DMSO media ctrl.lif - DMSO/214:0132-0384-0711:c:2/5 z:29/104 - DMSO/214	42.7			190406 Ctrl DMSO Inhibitor C1 DAPI C2 BF C3 Factin C4 Gata3 C5 Pard6.lif - Inhibitor/96:0199-0672-0354:c:4/5 z:40/61 - Inhibitor/96	17.05			Embryo 197
190406 Ctrl DMSO Inhibitor C1 DAPI C2 BF C3 Factin C4 Gata3 C5 Pard6.lif - ctrl/110:0209-0707-0619:c:4/5 z:44/66 - ctrl/110	25.82							220120 C1-PARD6B C2-GATA3 C3-DAPI BF C4-FACTIN 7.5uM U73122 treatment DMSO media ctrl.lif - DMSO/214:0192-0534-0772:c:2/5 z:39/104 - DMSO/214	138.97	4.63388		190406 Ctrl DMSO Inhibitor C1 DAPI C2 BF C3 Factin C4 Gata3 C5 Pard6.lif - Inhibitor/96:0199-0472-0360:c:4/5 z:40/61 - Inhibitor/96	23.04	1.1944		220120 C1-PARD6B C2-GATA3 C3-DAPI BF C4-FACTIN 7.5uM U73122 treatment DMSO media ctrl.lif - U73122 7.5uM/197:0102-0426-0402:c:2/5 z:21/62 - U73122 7.5uM/197	41	0.905877
190406 Ctrl DMSO Inhibitor C1 DAPI C2 BF C3 Factin C4 Gata3 C5 Pard6.lif - ctrl/110:0164-0652-0549:c:4/5 z:33/66 - ctrl/110	47.09	1.26111						220120 C1-PARD6B C2-GATA3 C3-DAPI BF C4-FACTIN 7.5uM U73122 treatment DMSO media ctrl.lif - DMSO/214:0192-0477-0792:c:2/5 z:39/104 - DMSO/214	29.99			190406 Ctrl DMSO Inhibitor C1 DAPI C2 BF C3 Factin C4 Gata3 C5 Pard6.lif - Inhibitor/96:0199-0418-0384:c:4/5 z:40/61 - Inhibitor/96	19.29			220120 C1-PARD6B C2-GATA3 C3-DAPI BF C4-FACTIN 7.5uM U73122 treatment DMSO media ctrl.lif - U73122 7.5uM/197:0102-0402-0446:c:2/5 z:21/62 - U73122 7.5uM/197	45.26
190406 Ctrl DMSO Inhibitor C1 DAPI C2 BF C3 Factin C4 Gata3 C5 Pard6.lif - ctrl/110:0164-0553-0562:c:4/5 z:33/66 - ctrl/110	37.34							220120 C1-PARD6B C2-GATA3 C3-DAPI BF C4-FACTIN 7.5uM U73122 treatment DMSO media ctrl.lif - DMSO/214:0192-0275-0618:c:2/5 z:39/104 - DMSO/214	113.19	2.85042		190406 Ctrl DMSO Inhibitor C1 DAPI C2 BF C3 Factin C4 Gata3 C5 Pard6.lif - Inhibitor/96:0204-0602-0359:c:4/5 z:41/61 - Inhibitor/96	18.38	1.10258		220120 C1-PARD6B C2-GATA3 C3-DAPI BF C4-FACTIN 7.5uM U73122 treatment DMSO media ctrl.lif - U73122 7.5uM/197:0102-0514-0569:c:2/5 z:21/62 - U73122 7.5uM/197	46.44	0.839783
190406 Ctrl DMSO Inhibitor C1 DAPI C2 BF C3 Factin C4 Gata3 C5 Pard6.lif - ctrl/110:0249-0518-0645:c:4/5 z:50/66 - ctrl/110	18.98	0.774694						220120 C1-PARD6B C2-GATA3 C3-DAPI BF C4-FACTIN 7.5uM U73122 treatment DMSO media ctrl.lif - DMSO/214:0192-0267-0561:c:2/5 z:39/104 - DMSO/214	39.71			190406 Ctrl DMSO Inhibitor C1 DAPI C2 BF C3 Factin C4 Gata3 C5 Pard6.lif - Inhibitor/96:0204-0673-0357:c:4/5 z:41/61 - Inhibitor/96	16.67			220120 C1-PARD6B C2-GATA3 C3-DAPI BF C4-FACTIN 7.5uM U73122 treatment DMSO media ctrl.lif - U73122 7.5uM/197:0102-0449-0592:c:2/5 z:21/62 - U73122 7.5uM/197	55.3
190406 Ctrl DMSO Inhibitor C1 DAPI C2 BF C3 Factin C4 Gata3 C5 Pard6.lif - ctrl/110:0249-0549-0561:c:4/5 z:50/66 - ctrl/110	24.5							220120 C1-PARD6B C2-GATA3 C3-DAPI BF C4-FACTIN 7.5uM U73122 treatment DMSO media ctrl.lif - DMSO/214:0192-0365-0504:c:2/5 z:39/104 - DMSO/214	136.57	3.68113		190406 Ctrl DMSO Inhibitor C1 DAPI C2 BF C3 Factin C4 Gata3 C5 Pard6.lif - Inhibitor/96:0204-0730-0521:c:4/5 z:41/61 - Inhibitor/96	20.07	1.25594		Embryo 195
190406 Ctrl DMSO Inhibitor C1 DAPI C2 BF C3 Factin C4 Gata3 C5 Pard6.lif - ctrl/110:0249-0696-0447:c:4/5 z:50/66 - ctrl/110	27.7	1.23495						220120 C1-PARD6B C2-GATA3 C3-DAPI BF C4-FACTIN 7.5uM U73122 treatment DMSO media ctrl.lif - DMSO/214:0192-0322-0501:c:2/5 z:39/104 - DMSO/214	37.1			190406 Ctrl DMSO Inhibitor C1 DAPI C2 BF C3 Factin C4 Gata3 C5 Pard6.lif - Inhibitor/96:0204-0777-0450:c:4/5 z:41/61 - Inhibitor/96	15.98			220120 C1-PARD6B C2-GATA3 C3-DAPI BF C4-FACTIN 7.5uM U73122 treatment DMSO media ctrl.lif - U73122 7.5uM/195:0172-0779-0593:c:2/5 z:37/76 - U73122 7.5uM/195	60.6	1.45359
190406 Ctrl DMSO Inhibitor C1 DAPI C2 BF C3 Factin C4 Gata3 C5 Pard6.lif - ctrl/110:0249-0612-0492:c:4/5 z:50/66 - ctrl/110	22.43							220120 C1-PARD6B C2-GATA3 C3-DAPI BF C4-FACTIN 7.5uM U73122 treatment DMSO media ctrl.lif - DMSO/214:0192-0487-0406:c:2/5 z:39/104 - DMSO/214	133.97	3.12576						220120 C1-PARD6B C2-GATA3 C3-DAPI BF C4-FACTIN 7.5uM U73122 treatment DMSO media ctrl.lif - U73122 7.5uM/195:0172-0704-0594:c:2/5 z:37/76 - U73122 7.5uM/195	41.69
190406 Ctrl DMSO Inhibitor C1 DAPI C2 BF C3 Factin C4 Gata3 C5 Pard6.lif - ctrl/110:0249-0460-0496:c:4/5 z:50/66 - ctrl/110	19.24	0.872167						220120 C1-PARD6B C2-GATA3 C3-DAPI BF C4-FACTIN 7.5uM U73122 treatment DMSO media ctrl.lif - DMSO/214:0192-0552-0420:c:2/5 z:39/104 - DMSO/214	42.86							220120 C1-PARD6B C2-GATA3 C3-DAPI BF C4-FACTIN 7.5uM U73122 treatment DMSO media ctrl.lif - U73122 7.5uM/195:0152-0619-0550:c:2/5 z:30/76 - U73122 7.5uM/195	61.12	1.50727
190406 Ctrl DMSO Inhibitor C1 DAPI C2 BF C3 Factin C4 Gata3 C5 Pard6.lif - ctrl/110:0249-0459-0551:c:4/5 z:50/66 - ctrl/110	22.06							220120 C1-PARD6B C2-GATA3 C3-DAPI BF C4-FACTIN 7.5uM U73122 treatment DMSO media ctrl.lif - DMSO/214:0192-0626-0454:c:2/5 z:39/104 - DMSO/214	104.65	2.25054						220120 C1-PARD6B C2-GATA3 C3-DAPI BF C4-FACTIN 7.5uM U73122 treatment DMSO media ctrl.lif - U73122 7.5uM/195:0152-0555-0521:c:2/5 z:30/76 - U73122 7.5uM/195	40.55
Embryo 109								220120 C1-PARD6B C2-GATA3 C3-DAPI BF C4-FACTIN 7.5uM U73122 treatment DMSO media ctrl.lif - DMSO/214:0192-0666-0462:c:2/5 z:39/104 - DMSO/214	46.5							220120 C1-PARD6B C2-GATA3 C3-DAPI BF C4-FACTIN 7.5uM U73122 treatment DMSO media ctrl.lif - U73122 7.5uM/195:0152-0559-0681:c:2/5 z:30/76 - U73122 7.5uM/195	60.96	1.23326
190406 Ctrl DMSO Inhibitor C1 DAPI C2 BF C3 Factin C4 Gata3 C5 Pard6.lif - ctrl/109:0219-0581-0579:c:4/5 z:44/66 - ctrl/109	18.78	0.606198						220120 C1-PARD6B C2-GATA3 C3-DAPI BF C4-FACTIN 7.5uM U73122 treatment DMSO media ctrl.lif - DMSO/214:0192-0698-0523:c:2/5 z:39/104 - DMSO/214	72.52	2.46919						220120 C1-PARD6B C2-GATA3 C3-DAPI BF C4-FACTIN 7.5uM U73122 treatment DMSO media ctrl.lif - U73122 7.5uM/195:0152-0520-0644:c:2/5 z:30/76 - U73122 7.5uM/195	49.43
190406 Ctrl DMSO Inhibitor C1 DAPI C2 BF C3 Factin C4 Gata3 C5 Pard6.lif - ctrl/109:0219-0570-0645:c:4/5 z:44/66 - ctrl/109	30.98							220120 C1-PARD6B C2-GATA3 C3-DAPI BF C4-FACTIN 7.5uM U73122 treatment DMSO media ctrl.lif - DMSO/214:0192-0706-0571:c:2/5 z:39/104 - DMSO/214	29.37							220120 C1-PARD6B C2-GATA3 C3-DAPI BF C4-FACTIN 7.5uM U73122 treatment DMSO media ctrl.lif - U73122 7.5uM/195:0152-0708-0676:c:2/5 z:30/76 - U73122 7.5uM/195	90.57	2.01356
190406 Ctrl DMSO Inhibitor C1 DAPI C2 BF C3 Factin C4 Gata3 C5 Pard6.lif - ctrl/109:0299-0431-0561:c:4/5 z:60/66 - ctrl/109	18.99	0.876731						220120 C1-PARD6B C2-GATA3 C3-DAPI BF C4-FACTIN 7.5uM U73122 treatment DMSO media ctrl.lif - DMSO/214:0192-0695-0635:c:2/5 z:39/104 - DMSO/214	82.41	2.35457						220120 C1-PARD6B C2-GATA3 C3-DAPI BF C4-FACTIN 7.5uM U73122 treatment DMSO media ctrl.lif - U73122 7.5uM/195:0152-0659-0690:c:2/5 z:30/76 - U73122 7.5uM/195	44.98
190406 Ctrl DMSO Inhibitor C1 DAPI C2 BF C3 Factin C4 Gata3 C5 Pard6.lif - ctrl/109:0299-0396-0630:c:4/5 z:60/66 - ctrl/109	21.66							220120 C1-PARD6B C2-GATA3 C3-DAPI BF C4-FACTIN 7.5uM U73122 treatment DMSO media ctrl.lif - DMSO/214:0192-0683-0683:c:2/5 z:39/104 - DMSO/214	35							220120 C1-PARD6B C2-GATA3 C3-DAPI BF C4-FACTIN 7.5uM U73122 treatment DMSO media ctrl.lif - U73122 7.5uM/195:0102-0614-0335:c:2/5 z:20/76 - U73122 7.5uM/195	73.5	2.03039
190406 Ctrl DMSO Inhibitor C1 DAPI C2 BF C3 Factin C4 Gata3 C5 Pard6.lif - ctrl/109:0249-0552-0390:c:4/5 z:50/66 - ctrl/109	16.53	0.849871						220120 C1-PARD6B C2-GATA3 C3-DAPI BF C4-FACTIN 7.5uM U73122 treatment DMSO media ctrl.lif - DMSO/214:0192-0563-0560:c:2/5 z:39/104 - DMSO/214	40.37	1.14916						220120 C1-PARD6B C2-GATA3 C3-DAPI BF C4-FACTIN 7.5uM U73122 treatment DMSO media ctrl.lif - U73122 7.5uM/195:0102-0678-0340:c:2/5 z:20/76 - U73122 7.5uM/195	36.2
190406 Ctrl DMSO Inhibitor C1 DAPI C2 BF C3 Factin C4 Gata3 C5 Pard6.lif - ctrl/109:0249-0491-0445:c:4/5 z:50/66 - ctrl/109	19.45							220120 C1-PARD6B C2-GATA3 C3-DAPI BF C4-FACTIN 7.5uM U73122 treatment DMSO media ctrl.lif - DMSO/214:0192-0598-0529:c:2/5 z:39/104 - DMSO/214	35.13							220120 C1-PARD6B C2-GATA3 C3-DAPI BF C4-FACTIN 7.5uM U73122 treatment DMSO media ctrl.lif - U73122 7.5uM/195:0062-0606-0594:c:2/5 z:12/76 - U73122 7.5uM/195	55.17	1.06178
190406 Ctrl DMSO Inhibitor C1 DAPI C2 BF C3 Factin C4 Gata3 C5 Pard6.lif - ctrl/109:0249-0641-0232:c:4/5 z:50/66 - ctrl/109	16.21	0.641218						220120 C1-PARD6B C2-GATA3 C3-DAPI BF C4-FACTIN 7.5uM U73122 treatment DMSO media ctrl.lif - DMSO/214:0232-0367-0767:c:2/5 z:47/104 - DMSO/214	209.45	8.15615						220120 C1-PARD6B C2-GATA3 C3-DAPI BF C4-FACTIN 7.5uM U73122 treatment DMSO media ctrl.lif - U73122 7.5uM/195:0062-0683-0585:c:2/5 z:12/76 - U73122 7.5uM/195	51.96
190406 Ctrl DMSO Inhibitor C1 DAPI C2 BF C3 Factin C4 Gata3 C5 Pard6.lif - ctrl/109:0249-0566-0218:c:4/5 z:50/66 - ctrl/109	25.28							220120 C1-PARD6B C2-GATA3 C3-DAPI BF C4-FACTIN 7.5uM U73122 treatment DMSO media ctrl.lif - DMSO/214:0232-0428-0800:c:2/5 z:47/104 - DMSO/214	25.68							220120 C1-PARD6B C2-GATA3 C3-DAPI BF C4-FACTIN 7.5uM U73122 treatment DMSO media ctrl.lif - U73122 7.5uM/195:0062-0632-0462:c:2/5 z:12/76 - U73122 7.5uM/195	60.85	2.07325
Embryo 108								220120 C1-PARD6B C2-GATA3 C3-DAPI BF C4-FACTIN 7.5uM U73122 treatment DMSO media ctrl.lif - DMSO/214:0232-0260-0477:c:2/5 z:47/104 - DMSO/214	105.33	3.00514						220120 C1-PARD6B C2-GATA3 C3-DAPI BF C4-FACTIN 7.5uM U73122 treatment DMSO media ctrl.lif - U73122 7.5uM/195:0062-0573-0504:c:2/5 z:12/76 - U73122 7.5uM/195	29.35
190406 Ctrl DMSO Inhibitor C1 DAPI C2 BF C3 Factin C4 Gata3 C5 Pard6.lif - ctrl/108:0149-0581-0457:c:4/5 z:30/66 - ctrl/108	26.95	0.6751						220120 C1-PARD6B C2-GATA3 C3-DAPI BF C4-FACTIN 7.5uM U73122 treatment DMSO media ctrl.lif - DMSO/214:0232-0244-0513:c:2/5 z:47/104 - DMSO/214	35.05							220120 C1-PARD6B C2-GATA3 C3-DAPI BF C4-FACTIN 7.5uM U73122 treatment DMSO media ctrl.lif - U73122 7.5uM/195:0167-0461-0602:c:2/5 z:42/76 - U73122 7.5uM/195	25.39	1.10728
190406 Ctrl DMSO Inhibitor C1 DAPI C2 BF C3 Factin C4 Gata3 C5 Pard6.lif - ctrl/108:0149-0518-0407:c:4/5 z:30/66 - ctrl/108	39.92							220120 C1-PARD6B C2-GATA3 C3-DAPI BF C4-FACTIN 7.5uM U73122 treatment DMSO media ctrl.lif - DMSO/214:0232-0489-0407:c:2/5 z:47/104 - DMSO/214	87.83	3.1742						220120 C1-PARD6B C2-GATA3 C3-DAPI BF C4-FACTIN 7.5uM U73122 treatment DMSO media ctrl.lif - U73122 7.5uM/195:0167-0422-0597:c:2/5 z:42/76 - U73122 7.5uM/195	22.93
190406 Ctrl DMSO Inhibitor C1 DAPI C2 BF C3 Factin C4 Gata3 C5 Pard6.lif - ctrl/108:0149-0649-0602:c:4/5 z:30/66 - ctrl/108	24.55	0.519027						220120 C1-PARD6B C2-GATA3 C3-DAPI BF C4-FACTIN 7.5uM U73122 treatment DMSO media ctrl.lif - DMSO/214:0232-0432-0404:c:2/5 z:47/104 - DMSO/214	27.67							220120 C1-PARD6B C2-GATA3 C3-DAPI BF C4-FACTIN 7.5uM U73122 treatment DMSO media ctrl.lif - U73122 7.5uM/195:0167-0775-0586:c:2/5 z:42/76 - U73122 7.5uM/195	44.33	1.21054
190406 Ctrl DMSO Inhibitor C1 DAPI C2 BF C3 Factin C4 Gata3 C5 Pard6.lif - ctrl/108:0149-0593-0675:c:4/5 z:30/66 - ctrl/108	47.3							220120 C1-PARD6B C2-GATA3 C3-DAPI BF C4-FACTIN 7.5uM U73122 treatment DMSO media ctrl.lif - DMSO/214:0267-0667-0462:c:2/5 z:54/104 - DMSO/214	84.12	3.12598						220120 C1-PARD6B C2-GATA3 C3-DAPI BF C4-FACTIN 7.5uM U73122 treatment DMSO media ctrl.lif - U73122 7.5uM/195:0167-0683-0607:c:2/5 z:42/76 - U73122 7.5uM/195	36.62
190406 Ctrl DMSO Inhibitor C1 DAPI C2 BF C3 Factin C4 Gata3 C5 Pard6.lif - ctrl/108:0149-0465-0521:c:4/5 z:30/66 - ctrl/108	32.54	1.00681						220120 C1-PARD6B C2-GATA3 C3-DAPI BF C4-FACTIN 7.5uM U73122 treatment DMSO media ctrl.lif - DMSO/214:0267-0625-0500:c:2/5 z:54/104 - DMSO/214	26.91							Embryo 191
190406 Ctrl DMSO Inhibitor C1 DAPI C2 BF C3 Factin C4 Gata3 C5 Pard6.lif - ctrl/108:0149-0456-0451:c:4/5 z:30/66 - ctrl/108	32.32							220120 C1-PARD6B C2-GATA3 C3-DAPI BF C4-FACTIN 7.5uM U73122 treatment DMSO media ctrl.lif - DMSO/214:0267-0684-0553:c:2/5 z:54/104 - DMSO/214	103.2	2.31028						220120 C1-PARD6B C2-GATA3 C3-DAPI BF C4-FACTIN 7.5uM U73122 treatment DMSO media ctrl.lif - U73122 7.5uM/191:0182-0395-0444:c:2/5 z:37/79 - U73122 7.5uM/191	26.55	0.632745
190406 Ctrl DMSO Inhibitor C1 DAPI C2 BF C3 Factin C4 Gata3 C5 Pard6.lif - ctrl/108:0239-0706-0643:c:4/5 z:48/66 - ctrl/108	19.07	0.866424						220120 C1-PARD6B C2-GATA3 C3-DAPI BF C4-FACTIN 7.5uM U73122 treatment DMSO media ctrl.lif - DMSO/214:0267-0701-0583:c:2/5 z:54/104 - DMSO/214	44.67							220120 C1-PARD6B C2-GATA3 C3-DAPI BF C4-FACTIN 7.5uM U73122 treatment DMSO media ctrl.lif - U73122 7.5uM/191:0182-0358-0450:c:2/5 z:37/79 - U73122 7.5uM/191	41.96
190406 Ctrl DMSO Inhibitor C1 DAPI C2 BF C3 Factin C4 Gata3 C5 Pard6.lif - ctrl/108:0239-0667-0560:c:4/5 z:48/66 - ctrl/108	22.01							220120 C1-PARD6B C2-GATA3 C3-DAPI BF C4-FACTIN 7.5uM U73122 treatment DMSO media ctrl.lif - DMSO/214:0267-0641-0697:c:2/5 z:54/104 - DMSO/214	82.26	2.85229						220120 C1-PARD6B C2-GATA3 C3-DAPI BF C4-FACTIN 7.5uM U73122 treatment DMSO media ctrl.lif - U73122 7.5uM/191:0142-0421-0555:c:2/5 z:29/79 - U73122 7.5uM/191	31.24	0.470766
190406 Ctrl DMSO Inhibitor C1 DAPI C2 BF C3 Factin C4 Gata3 C5 Pard6.lif - ctrl/108:0239-0592-0398:c:4/5 z:48/66 - ctrl/108	20.65	0.8214						220120 C1-PARD6B C2-GATA3 C3-DAPI BF C4-FACTIN 7.5uM U73122 treatment DMSO media ctrl.lif - DMSO/214:0267-0682-0669:c:2/5 z:54/104 - DMSO/214	28.84							220120 C1-PARD6B C2-GATA3 C3-DAPI BF C4-FACTIN 7.5uM U73122 treatment DMSO media ctrl.lif - U73122 7.5uM/191:0142-0371-0556:c:2/5 z:29/79 - U73122 7.5uM/191	66.36
190406 Ctrl DMSO Inhibitor C1 DAPI C2 BF C3 Factin C4 Gata3 C5 Pard6.lif - ctrl/108:0239-0663-0361:c:4/5 z:48/66 - ctrl/108	25.14							220120 C1-PARD6B C2-GATA3 C3-DAPI BF C4-FACTIN 7.5uM U73122 treatment DMSO media ctrl.lif - DMSO/214:0267-0269-0473:c:2/5 z:54/104 - DMSO/214	96.71	2.97844						220120 C1-PARD6B C2-GATA3 C3-DAPI BF C4-FACTIN 7.5uM U73122 treatment DMSO media ctrl.lif - U73122 7.5uM/191:0142-0522-0604:c:2/5 z:29/79 - U73122 7.5uM/191	38.75	0.764451
190406 Ctrl DMSO Inhibitor C1 DAPI C2 BF C3 Factin C4 Gata3 C5 Pard6.lif - ctrl/108:0239-0401-0639:c:4/5 z:48/66 - ctrl/108	24.34	0.762293						220120 C1-PARD6B C2-GATA3 C3-DAPI BF C4-FACTIN 7.5uM U73122 treatment DMSO media ctrl.lif - DMSO/214:0267-0243-0531:c:2/5 z:54/104 - DMSO/214	32.47							220120 C1-PARD6B C2-GATA3 C3-DAPI BF C4-FACTIN 7.5uM U73122 treatment DMSO media ctrl.lif - U73122 7.5uM/191:0142-0510-0671:c:2/5 z:29/79 - U73122 7.5uM/191	50.69
190406 Ctrl DMSO Inhibitor C1 DAPI C2 BF C3 Factin C4 Gata3 C5 Pard6.lif - ctrl/108:0239-0404-0704:c:4/5 z:48/66 - ctrl/108	31.93							220120 C1-PARD6B C2-GATA3 C3-DAPI BF C4-FACTIN 7.5uM U73122 treatment DMSO media ctrl.lif - DMSO/214:0307-0377-0393:c:2/5 z:63/104 - DMSO/214	116.24	3.90723						220120 C1-PARD6B C2-GATA3 C3-DAPI BF C4-FACTIN 7.5uM U73122 treatment DMSO media ctrl.lif - U73122 7.5uM/191:0142-0638-0474:c:2/5 z:29/79 - U73122 7.5uM/191	32.34	0.728542
Embryo 210								220120 C1-PARD6B C2-GATA3 C3-DAPI BF C4-FACTIN 7.5uM U73122 treatment DMSO media ctrl.lif - DMSO/214:0307-0435-0361:c:2/5 z:63/104 - DMSO/214	29.75							220120 C1-PARD6B C2-GATA3 C3-DAPI BF C4-FACTIN 7.5uM U73122 treatment DMSO media ctrl.lif - U73122 7.5uM/191:0142-0714-0421:c:2/5 z:29/79 - U73122 7.5uM/191	44.39
220120 C1-PARD6B C2-GATA3 C3-DAPI BF C4-FACTIN 7.5uM U73122 treatment DMSO media ctrl.lif - ctrl media/210:0182-0707-0401:c:2/5 z:38/76 - ctrl media/210	108.99	1.62212						220120 C1-PARD6B C2-GATA3 C3-DAPI BF C4-FACTIN 7.5uM U73122 treatment DMSO media ctrl.lif - DMSO/214:0307-0591-0381:c:2/5 z:63/104 - DMSO/214	82.86	3.70738						220120 C1-PARD6B C2-GATA3 C3-DAPI BF C4-FACTIN 7.5uM U73122 treatment DMSO media ctrl.lif - U73122 7.5uM/191:0142-0583-0319:c:2/5 z:29/79 - U73122 7.5uM/191	32.66	0.752535
220120 C1-PARD6B C2-GATA3 C3-DAPI BF C4-FACTIN 7.5uM U73122 treatment DMSO media ctrl.lif - ctrl media/210:0182-0677-0349:c:2/5 z:38/76 - ctrl media/210	67.19							220120 C1-PARD6B C2-GATA3 C3-DAPI BF C4-FACTIN 7.5uM U73122 treatment DMSO media ctrl.lif - DMSO/214:0307-0656-0395:c:2/5 z:63/104 - DMSO/214	22.35							220120 C1-PARD6B C2-GATA3 C3-DAPI BF C4-FACTIN 7.5uM U73122 treatment DMSO media ctrl.lif - U73122 7.5uM/191:0142-0526-0274:c:2/5 z:29/79 - U73122 7.5uM/191	43.4
220120 C1-PARD6B C2-GATA3 C3-DAPI BF C4-FACTIN 7.5uM U73122 treatment DMSO media ctrl.lif - ctrl media/210:0182-0582-0336:c:2/5 z:38/76 - ctrl media/210	115.59	2.63303						220120 C1-PARD6B C2-GATA3 C3-DAPI BF C4-FACTIN 7.5uM U73122 treatment DMSO media ctrl.lif - DMSO/214:0307-0684-0554:c:2/5 z:63/104 - DMSO/214	79.75	3.49934						220120 C1-PARD6B C2-GATA3 C3-DAPI BF C4-FACTIN 7.5uM U73122 treatment DMSO media ctrl.lif - U73122 7.5uM/191:0212-0661-0613:c:2/5 z:43/79 - U73122 7.5uM/191	28.23	0.7118
220120 C1-PARD6B C2-GATA3 C3-DAPI BF C4-FACTIN 7.5uM U73122 treatment DMSO media ctrl.lif - ctrl media/210:0182-0535-0364:c:2/5 z:38/76 - ctrl media/210	43.9							220120 C1-PARD6B C2-GATA3 C3-DAPI BF C4-FACTIN 7.5uM U73122 treatment DMSO media ctrl.lif - DMSO/214:0307-0659-0591:c:2/5 z:63/104 - DMSO/214	22.79							220120 C1-PARD6B C2-GATA3 C3-DAPI BF C4-FACTIN 7.5uM U73122 treatment DMSO media ctrl.lif - U73122 7.5uM/191:0212-0701-0526:c:2/5 z:43/79 - U73122 7.5uM/191	39.66
220120 C1-PARD6B C2-GATA3 C3-DAPI BF C4-FACTIN 7.5uM U73122 treatment DMSO media ctrl.lif - ctrl media/210:0182-0632-0395:c:2/5 z:38/76 - ctrl media/210	80.16	1.99453						Embryo 213								Embryo 194
220120 C1-PARD6B C2-GATA3 C3-DAPI BF C4-FACTIN 7.5uM U73122 treatment DMSO media ctrl.lif - ctrl media/210:0182-0611-0433:c:2/5 z:38/76 - ctrl media/210	40.19							220120 C1-PARD6B C2-GATA3 C3-DAPI BF C4-FACTIN 7.5uM U73122 treatment DMSO media ctrl.lif - DMSO/213:0117-0557-0398:c:2/5 z:28/76 - DMSO/213	61.93	1						220120 C1-PARD6B C2-GATA3 C3-DAPI BF C4-FACTIN 7.5uM U73122 treatment DMSO media ctrl.lif - U73122 7.5uM/194:0132-0498-0341:c:2/5 z:27/78 - U73122 7.5uM/194	30.91	0.574856
220120 C1-PARD6B C2-GATA3 C3-DAPI BF C4-FACTIN 7.5uM U73122 treatment DMSO media ctrl.lif - ctrl media/210:0182-0569-0523:c:2/5 z:38/76 - ctrl media/210	53.37	1.23828						220120 C1-PARD6B C2-GATA3 C3-DAPI BF C4-FACTIN 7.5uM U73122 treatment DMSO media ctrl.lif - DMSO/213:0117-0557-0398:c:2/5 z:28/76 - DMSO/213	61.93							220120 C1-PARD6B C2-GATA3 C3-DAPI BF C4-FACTIN 7.5uM U73122 treatment DMSO media ctrl.lif - U73122 7.5uM/194:0132-0463-0360:c:2/5 z:27/78 - U73122 7.5uM/194	53.77
220120 C1-PARD6B C2-GATA3 C3-DAPI BF C4-FACTIN 7.5uM U73122 treatment DMSO media ctrl.lif - ctrl media/210:0182-0585-0444:c:2/5 z:38/76 - ctrl media/210	43.1							220120 C1-PARD6B C2-GATA3 C3-DAPI BF C4-FACTIN 7.5uM U73122 treatment DMSO media ctrl.lif - DMSO/213:0117-0422-0572:c:2/5 z:28/76 - DMSO/213	49.82	0.858521						220120 C1-PARD6B C2-GATA3 C3-DAPI BF C4-FACTIN 7.5uM U73122 treatment DMSO media ctrl.lif - U73122 7.5uM/194:0132-0497-0698:c:2/5 z:27/78 - U73122 7.5uM/194	35.89	0.838356
220120 C1-PARD6B C2-GATA3 C3-DAPI BF C4-FACTIN 7.5uM U73122 treatment DMSO media ctrl.lif - ctrl media/210:0182-0400-0525:c:2/5 z:38/76 - ctrl media/210	51.59	0.855981						220120 C1-PARD6B C2-GATA3 C3-DAPI BF C4-FACTIN 7.5uM U73122 treatment DMSO media ctrl.lif - DMSO/213:0117-0458-0646:c:2/5 z:28/76 - DMSO/213	58.03							220120 C1-PARD6B C2-GATA3 C3-DAPI BF C4-FACTIN 7.5uM U73122 treatment DMSO media ctrl.lif - U73122 7.5uM/194:0132-0462-0641:c:2/5 z:27/78 - U73122 7.5uM/194	42.81
220120 C1-PARD6B C2-GATA3 C3-DAPI BF C4-FACTIN 7.5uM U73122 treatment DMSO media ctrl.lif - ctrl media/210:0182-0398-0474:c:2/5 z:38/76 - ctrl media/210	60.27							220120 C1-PARD6B C2-GATA3 C3-DAPI BF C4-FACTIN 7.5uM U73122 treatment DMSO media ctrl.lif - DMSO/213:0177-0628-0630:c:2/5 z:37/76 - DMSO/213	47.08	0.656991						220120 C1-PARD6B C2-GATA3 C3-DAPI BF C4-FACTIN 7.5uM U73122 treatment DMSO media ctrl.lif - U73122 7.5uM/194:0132-0382-0599:c:2/5 z:27/78 - U73122 7.5uM/194	40.62	0.972934
220120 C1-PARD6B C2-GATA3 C3-DAPI BF C4-FACTIN 7.5uM U73122 treatment DMSO media ctrl.lif - ctrl media/210:0152-0696-0500:c:2/5 z:31/76 - ctrl media/210	125.3	2.12806						220120 C1-PARD6B C2-GATA3 C3-DAPI BF C4-FACTIN 7.5uM U73122 treatment DMSO media ctrl.lif - DMSO/213:0177-0641-0684:c:2/5 z:37/76 - DMSO/213	71.66							220120 C1-PARD6B C2-GATA3 C3-DAPI BF C4-FACTIN 7.5uM U73122 treatment DMSO media ctrl.lif - U73122 7.5uM/194:0132-0328-0613:c:2/5 z:27/78 - U73122 7.5uM/194	41.75
220120 C1-PARD6B C2-GATA3 C3-DAPI BF C4-FACTIN 7.5uM U73122 treatment DMSO media ctrl.lif - ctrl media/210:0152-0709-0443:c:2/5 z:31/76 - ctrl media/210	58.88							220120 C1-PARD6B C2-GATA3 C3-DAPI BF C4-FACTIN 7.5uM U73122 treatment DMSO media ctrl.lif - DMSO/213:0177-0471-0689:c:2/5 z:37/76 - DMSO/213	38.16	0.670415						220120 C1-PARD6B C2-GATA3 C3-DAPI BF C4-FACTIN 7.5uM U73122 treatment DMSO media ctrl.lif - U73122 7.5uM/194:0122-0586-0429:c:2/5 z:25/78 - U73122 7.5uM/194	40.64	0.932752
220120 C1-PARD6B C2-GATA3 C3-DAPI BF C4-FACTIN 7.5uM U73122 treatment DMSO media ctrl.lif - ctrl media/210:0152-0571-0513:c:2/5 z:31/76 - ctrl media/210	161.17	3.72045						220120 C1-PARD6B C2-GATA3 C3-DAPI BF C4-FACTIN 7.5uM U73122 treatment DMSO media ctrl.lif - DMSO/213:0177-0422-0675:c:2/5 z:37/76 - DMSO/213	56.92							220120 C1-PARD6B C2-GATA3 C3-DAPI BF C4-FACTIN 7.5uM U73122 treatment DMSO media ctrl.lif - U73122 7.5uM/194:0122-0541-0450:c:2/5 z:25/78 - U73122 7.5uM/194	43.57
220120 C1-PARD6B C2-GATA3 C3-DAPI BF C4-FACTIN 7.5uM U73122 treatment DMSO media ctrl.lif - ctrl media/210:0152-0518-0501:c:2/5 z:31/76 - ctrl media/210	43.32							220120 C1-PARD6B C2-GATA3 C3-DAPI BF C4-FACTIN 7.5uM U73122 treatment DMSO media ctrl.lif - DMSO/213:0177-0361-0459:c:2/5 z:37/76 - DMSO/213	42.1	0.706494						220120 C1-PARD6B C2-GATA3 C3-DAPI BF C4-FACTIN 7.5uM U73122 treatment DMSO media ctrl.lif - U73122 7.5uM/194:0122-0570-0559:c:2/5 z:25/78 - U73122 7.5uM/194	37.55	0.963067
220120 C1-PARD6B C2-GATA3 C3-DAPI BF C4-FACTIN 7.5uM U73122 treatment DMSO media ctrl.lif - ctrl media/210:0257-0504-0455:c:2/5 z:54/76 - ctrl media/210	40.23	1.21946						220120 C1-PARD6B C2-GATA3 C3-DAPI BF C4-FACTIN 7.5uM U73122 treatment DMSO media ctrl.lif - DMSO/213:0177-0316-0479:c:2/5 z:37/76 - DMSO/213	59.59							220120 C1-PARD6B C2-GATA3 C3-DAPI BF C4-FACTIN 7.5uM U73122 treatment DMSO media ctrl.lif - U73122 7.5uM/194:0122-0522-0574:c:2/5 z:25/78 - U73122 7.5uM/194	38.99
220120 C1-PARD6B C2-GATA3 C3-DAPI BF C4-FACTIN 7.5uM U73122 treatment DMSO media ctrl.lif - ctrl media/210:0257-0555-0426:c:2/5 z:54/76 - ctrl media/210	32.99							Embryo 211								220120 C1-PARD6B C2-GATA3 C3-DAPI BF C4-FACTIN 7.5uM U73122 treatment DMSO media ctrl.lif - U73122 7.5uM/194:0212-0357-0667:c:2/5 z:43/78 - U73122 7.5uM/194	30.33	0.879896
220120 C1-PARD6B C2-GATA3 C3-DAPI BF C4-FACTIN 7.5uM U73122 treatment DMSO media ctrl.lif - ctrl media/210:0257-0618-0686:c:2/5 z:54/76 - ctrl media/210	23.73	0.602284						220120 C1-PARD6B C2-GATA3 C3-DAPI BF C4-FACTIN 7.5uM U73122 treatment DMSO media ctrl.lif - DMSO/211:0127-0497-0431:c:2/5 z:27/81 - DMSO/211	43.26	0.659854						220120 C1-PARD6B C2-GATA3 C3-DAPI BF C4-FACTIN 7.5uM U73122 treatment DMSO media ctrl.lif - U73122 7.5uM/194:0212-0390-0624:c:2/5 z:43/78 - U73122 7.5uM/194	34.47
220120 C1-PARD6B C2-GATA3 C3-DAPI BF C4-FACTIN 7.5uM U73122 treatment DMSO media ctrl.lif - ctrl media/210:0257-0551-0714:c:2/5 z:54/76 - ctrl media/210	39.4							220120 C1-PARD6B C2-GATA3 C3-DAPI BF C4-FACTIN 7.5uM U73122 treatment DMSO media ctrl.lif - DMSO/211:0127-0438-0400:c:2/5 z:27/81 - DMSO/211	65.56							220120 C1-PARD6B C2-GATA3 C3-DAPI BF C4-FACTIN 7.5uM U73122 treatment DMSO media ctrl.lif - U73122 7.5uM/194:0212-0523-0345:c:2/5 z:43/78 - U73122 7.5uM/194	27.46	0.592832
Embryo 209								220120 C1-PARD6B C2-GATA3 C3-DAPI BF C4-FACTIN 7.5uM U73122 treatment DMSO media ctrl.lif - DMSO/211:0127-0422-0639:c:2/5 z:27/81 - DMSO/211	38.44	0.654521						220120 C1-PARD6B C2-GATA3 C3-DAPI BF C4-FACTIN 7.5uM U73122 treatment DMSO media ctrl.lif - U73122 7.5uM/194:0212-0492-0309:c:2/5 z:43/78 - U73122 7.5uM/194	46.32
220120 C1-PARD6B C2-GATA3 C3-DAPI BF C4-FACTIN 7.5uM U73122 treatment DMSO media ctrl.lif - ctrl media/209:0142-0637-0512:c:2/5 z:27/81 - ctrl media/209	41.8	1						220120 C1-PARD6B C2-GATA3 C3-DAPI BF C4-FACTIN 7.5uM U73122 treatment DMSO media ctrl.lif - DMSO/211:0127-0393-0668:c:2/5 z:27/81 - DMSO/211	58.73							220120 C1-PARD6B C2-GATA3 C3-DAPI BF C4-FACTIN 7.5uM U73122 treatment DMSO media ctrl.lif - U73122 7.5uM/194:0212-0680-0436:c:2/5 z:43/78 - U73122 7.5uM/194	24.25	1.1864
220120 C1-PARD6B C2-GATA3 C3-DAPI BF C4-FACTIN 7.5uM U73122 treatment DMSO media ctrl.lif - ctrl media/209:0142-0637-0512:c:2/5 z:27/81 - ctrl media/209	41.8							220120 C1-PARD6B C2-GATA3 C3-DAPI BF C4-FACTIN 7.5uM U73122 treatment DMSO media ctrl.lif - DMSO/211:0127-0455-0551:c:2/5 z:27/81 - DMSO/211	49.36	0.893232						220120 C1-PARD6B C2-GATA3 C3-DAPI BF C4-FACTIN 7.5uM U73122 treatment DMSO media ctrl.lif - U73122 7.5uM/194:0212-0648-0515:c:2/5 z:43/78 - U73122 7.5uM/194	20.44
220120 C1-PARD6B C2-GATA3 C3-DAPI BF C4-FACTIN 7.5uM U73122 treatment DMSO media ctrl.lif - ctrl media/209:0132-0663-0664:c:2/5 z:27/81 - ctrl media/209	53.21	1.07062						220120 C1-PARD6B C2-GATA3 C3-DAPI BF C4-FACTIN 7.5uM U73122 treatment DMSO media ctrl.lif - DMSO/211:0127-0444-0481:c:2/5 z:27/81 - DMSO/211	55.26							Embryo 193
220120 C1-PARD6B C2-GATA3 C3-DAPI BF C4-FACTIN 7.5uM U73122 treatment DMSO media ctrl.lif - ctrl media/209:0132-0620-0700:c:2/5 z:27/81 - ctrl media/209	49.7							220120 C1-PARD6B C2-GATA3 C3-DAPI BF C4-FACTIN 7.5uM U73122 treatment DMSO media ctrl.lif - DMSO/211:0182-0614-0347:c:2/5 z:37/81 - DMSO/211	35.52	0.815802						220120 C1-PARD6B C2-GATA3 C3-DAPI BF C4-FACTIN 7.5uM U73122 treatment DMSO media ctrl.lif - U73122 7.5uM/193:0097-0375-0589:c:2/5 z:20/69 - U73122 7.5uM/193	33.79	0.648934
220120 C1-PARD6B C2-GATA3 C3-DAPI BF C4-FACTIN 7.5uM U73122 treatment DMSO media ctrl.lif - ctrl media/209:0132-0475-0704:c:2/5 z:27/81 - ctrl media/209	45.29	1.24938						220120 C1-PARD6B C2-GATA3 C3-DAPI BF C4-FACTIN 7.5uM U73122 treatment DMSO media ctrl.lif - DMSO/211:0182-0582-0393:c:2/5 z:37/81 - DMSO/211	43.54							220120 C1-PARD6B C2-GATA3 C3-DAPI BF C4-FACTIN 7.5uM U73122 treatment DMSO media ctrl.lif - U73122 7.5uM/193:0097-0335-0557:c:2/5 z:20/69 - U73122 7.5uM/193	52.07
220120 C1-PARD6B C2-GATA3 C3-DAPI BF C4-FACTIN 7.5uM U73122 treatment DMSO media ctrl.lif - ctrl media/209:0132-0441-0651:c:2/5 z:27/81 - ctrl media/209	36.25							220120 C1-PARD6B C2-GATA3 C3-DAPI BF C4-FACTIN 7.5uM U73122 treatment DMSO media ctrl.lif - DMSO/211:0182-0550-0550:c:2/5 z:37/81 - DMSO/211	46.54	1.0992						220120 C1-PARD6B C2-GATA3 C3-DAPI BF C4-FACTIN 7.5uM U73122 treatment DMSO media ctrl.lif - U73122 7.5uM/193:0097-0478-0440:c:2/5 z:20/69 - U73122 7.5uM/193	48.09	0.759236
220120 C1-PARD6B C2-GATA3 C3-DAPI BF C4-FACTIN 7.5uM U73122 treatment DMSO media ctrl.lif - ctrl media/209:0132-0779-0581:c:2/5 z:27/81 - ctrl media/209	55.37	1.07997						220120 C1-PARD6B C2-GATA3 C3-DAPI BF C4-FACTIN 7.5uM U73122 treatment DMSO media ctrl.lif - DMSO/211:0182-0529-0477:c:2/5 z:37/81 - DMSO/211	42.34							220120 C1-PARD6B C2-GATA3 C3-DAPI BF C4-FACTIN 7.5uM U73122 treatment DMSO media ctrl.lif - U73122 7.5uM/193:0097-0441-0405:c:2/5 z:20/69 - U73122 7.5uM/193	63.34
220120 C1-PARD6B C2-GATA3 C3-DAPI BF C4-FACTIN 7.5uM U73122 treatment DMSO media ctrl.lif - ctrl media/209:0132-0739-0540:c:2/5 z:27/81 - ctrl media/209	51.27							220120 C1-PARD6B C2-GATA3 C3-DAPI BF C4-FACTIN 7.5uM U73122 treatment DMSO media ctrl.lif - DMSO/211:0182-0687-0566:c:2/5 z:37/81 - DMSO/211	40.43	0.869836						220120 C1-PARD6B C2-GATA3 C3-DAPI BF C4-FACTIN 7.5uM U73122 treatment DMSO media ctrl.lif - U73122 7.5uM/193:0097-0485-0541:c:2/5 z:20/69 - U73122 7.5uM/193	52.26	0.91252
220120 C1-PARD6B C2-GATA3 C3-DAPI BF C4-FACTIN 7.5uM U73122 treatment DMSO media ctrl.lif - ctrl media/209:0187-0677-0572:c:2/5 z:38/81 - ctrl media/209	26.53	0.639894						220120 C1-PARD6B C2-GATA3 C3-DAPI BF C4-FACTIN 7.5uM U73122 treatment DMSO media ctrl.lif - DMSO/211:0182-0681-0631:c:2/5 z:37/81 - DMSO/211	46.48							220120 C1-PARD6B C2-GATA3 C3-DAPI BF C4-FACTIN 7.5uM U73122 treatment DMSO media ctrl.lif - U73122 7.5uM/193:0097-0454-0507:c:2/5 z:20/69 - U73122 7.5uM/193	57.27
220120 C1-PARD6B C2-GATA3 C3-DAPI BF C4-FACTIN 7.5uM U73122 treatment DMSO media ctrl.lif - ctrl media/209:0187-0671-0620:c:2/5 z:38/81 - ctrl media/209	41.46							Embryo 636								220120 C1-PARD6B C2-GATA3 C3-DAPI BF C4-FACTIN 7.5uM U73122 treatment DMSO media ctrl.lif - U73122 7.5uM/193:0097-0584-0536:c:2/5 z:20/69 - U73122 7.5uM/193	49.09	1.0496
220120 C1-PARD6B C2-GATA3 C3-DAPI BF C4-FACTIN 7.5uM U73122 treatment DMSO media ctrl.lif - ctrl media/209:0187-0684-0394:c:2/5 z:38/81 - ctrl media/209	66.4	1.63145						191228 DMSO and U73122 7.5uM C1-Factin C2-GATA3 C3- DAPI BF C4-PARD6B.lif - dmso/636:0117-0406-0633:c:2/5 z:24/62 - dmso/636	21.78	1						220120 C1-PARD6B C2-GATA3 C3-DAPI BF C4-FACTIN 7.5uM U73122 treatment DMSO media ctrl.lif - U73122 7.5uM/193:0097-0560-0496:c:2/5 z:20/69 - U73122 7.5uM/193	46.77
220120 C1-PARD6B C2-GATA3 C3-DAPI BF C4-FACTIN 7.5uM U73122 treatment DMSO media ctrl.lif - ctrl media/209:0187-0743-0409:c:2/5 z:38/81 - ctrl media/209	40.7							191228 DMSO and U73122 7.5uM C1-Factin C2-GATA3 C3- DAPI BF C4-PARD6B.lif - dmso/636:0117-0406-0633:c:2/5 z:24/62 - dmso/636	21.78							220120 C1-PARD6B C2-GATA3 C3-DAPI BF C4-FACTIN 7.5uM U73122 treatment DMSO media ctrl.lif - U73122 7.5uM/193:0167-0599-0428:c:2/5 z:34/69 - U73122 7.5uM/193	31.46	0.716955
220120 C1-PARD6B C2-GATA3 C3-DAPI BF C4-FACTIN 7.5uM U73122 treatment DMSO media ctrl.lif - ctrl media/209:0187-0544-0653:c:2/5 z:38/81 - ctrl media/209	26.42	0.704721						191228 DMSO and U73122 7.5uM C1-Factin C2-GATA3 C3- DAPI BF C4-PARD6B.lif - dmso/636:0152-0569-0469:c:2/5 z:31/62 - dmso/636	10.52	0.853896						220120 C1-PARD6B C2-GATA3 C3-DAPI BF C4-FACTIN 7.5uM U73122 treatment DMSO media ctrl.lif - U73122 7.5uM/193:0167-0552-0450:c:2/5 z:34/69 - U73122 7.5uM/193	43.88
220120 C1-PARD6B C2-GATA3 C3-DAPI BF C4-FACTIN 7.5uM U73122 treatment DMSO media ctrl.lif - ctrl media/209:0187-0491-0674:c:2/5 z:38/81 - ctrl media/209	37.49							191228 DMSO and U73122 7.5uM C1-Factin C2-GATA3 C3- DAPI BF C4-PARD6B.lif - dmso/636:0152-0488-0485:c:2/5 z:31/62 - dmso/636	12.32							220120 C1-PARD6B C2-GATA3 C3-DAPI BF C4-FACTIN 7.5uM U73122 treatment DMSO media ctrl.lif - U73122 7.5uM/193:0167-0428-0527:c:2/5 z:34/69 - U73122 7.5uM/193	48.09	1.05576
Embryo 208																220120 C1-PARD6B C2-GATA3 C3-DAPI BF C4-FACTIN 7.5uM U73122 treatment DMSO media ctrl.lif - U73122 7.5uM/193:0167-0433-0463:c:2/5 z:34/69 - U73122 7.5uM/193	45.55
220120 C1-PARD6B C2-GATA3 C3-DAPI BF C4-FACTIN 7.5uM U73122 treatment DMSO media ctrl.lif - ctrl media/208:0122-0446-0553:c:2/5 z:25/81 - ctrl media/208	42.81	0.999533														220120 C1-PARD6B C2-GATA3 C3-DAPI BF C4-FACTIN 7.5uM U73122 treatment DMSO media ctrl.lif - U73122 7.5uM/193:0167-0455-0372:c:2/5 z:34/69 - U73122 7.5uM/193	34.32	0.659113
220120 C1-PARD6B C2-GATA3 C3-DAPI BF C4-FACTIN 7.5uM U73122 treatment DMSO media ctrl.lif - ctrl media/208:0122-0408-0598:c:2/5 z:25/81 - ctrl media/208	42.83															220120 C1-PARD6B C2-GATA3 C3-DAPI BF C4-FACTIN 7.5uM U73122 treatment DMSO media ctrl.lif - U73122 7.5uM/193:0167-0408-0387:c:2/5 z:34/69 - U73122 7.5uM/193	52.07
220120 C1-PARD6B C2-GATA3 C3-DAPI BF C4-FACTIN 7.5uM U73122 treatment DMSO media ctrl.lif - ctrl media/208:0122-0310-0508:c:2/5 z:25/81 - ctrl media/208	41.91	0.855306														220120 C1-PARD6B C2-GATA3 C3-DAPI BF C4-FACTIN 7.5uM U73122 treatment DMSO media ctrl.lif - U73122 7.5uM/193:0167-0550-0507:c:2/5 z:34/69 - U73122 7.5uM/193	34.41	0.750982
220120 C1-PARD6B C2-GATA3 C3-DAPI BF C4-FACTIN 7.5uM U73122 treatment DMSO media ctrl.lif - ctrl media/208:0122-0362-0521:c:2/5 z:25/81 - ctrl media/208	49															220120 C1-PARD6B C2-GATA3 C3-DAPI BF C4-FACTIN 7.5uM U73122 treatment DMSO media ctrl.lif - U73122 7.5uM/193:0167-0499-0483:c:2/5 z:34/69 - U73122 7.5uM/193	45.82
220120 C1-PARD6B C2-GATA3 C3-DAPI BF C4-FACTIN 7.5uM U73122 treatment DMSO media ctrl.lif - ctrl media/208:0152-0283-0624:c:2/5 z:31/81 - ctrl media/208	51	1.08005														Embryo 192
220120 C1-PARD6B C2-GATA3 C3-DAPI BF C4-FACTIN 7.5uM U73122 treatment DMSO media ctrl.lif - ctrl media/208:0152-0259-0695:c:2/5 z:31/81 - ctrl media/208	47.22															220120 C1-PARD6B C2-GATA3 C3-DAPI BF C4-FACTIN 7.5uM U73122 treatment DMSO media ctrl.lif - U73122 7.5uM/192:0187-0661-0517:c:2/5 z:38/76 - U73122 7.5uM/192	30.76	0.684164
220120 C1-PARD6B C2-GATA3 C3-DAPI BF C4-FACTIN 7.5uM U73122 treatment DMSO media ctrl.lif - ctrl media/208:0152-0302-0774:c:2/5 z:31/81 - ctrl media/208	31.68	0.693217														220120 C1-PARD6B C2-GATA3 C3-DAPI BF C4-FACTIN 7.5uM U73122 treatment DMSO media ctrl.lif - U73122 7.5uM/192:0187-0592-0492:c:2/5 z:38/76 - U73122 7.5uM/192	44.96
220120 C1-PARD6B C2-GATA3 C3-DAPI BF C4-FACTIN 7.5uM U73122 treatment DMSO media ctrl.lif - ctrl media/208:0152-0362-0757:c:2/5 z:31/81 - ctrl media/208	45.7															220120 C1-PARD6B C2-GATA3 C3-DAPI BF C4-FACTIN 7.5uM U73122 treatment DMSO media ctrl.lif - U73122 7.5uM/192:0187-0617-0379:c:2/5 z:38/76 - U73122 7.5uM/192	27.1	0.755927
220120 C1-PARD6B C2-GATA3 C3-DAPI BF C4-FACTIN 7.5uM U73122 treatment DMSO media ctrl.lif - ctrl media/208:0177-0550-0528:c:2/5 z:36/81 - ctrl media/208	24.03	0.657996														220120 C1-PARD6B C2-GATA3 C3-DAPI BF C4-FACTIN 7.5uM U73122 treatment DMSO media ctrl.lif - U73122 7.5uM/192:0187-0557-0357:c:2/5 z:38/76 - U73122 7.5uM/192	35.85
220120 C1-PARD6B C2-GATA3 C3-DAPI BF C4-FACTIN 7.5uM U73122 treatment DMSO media ctrl.lif - ctrl media/208:0177-0576-0578:c:2/5 z:36/81 - ctrl media/208	36.52															220120 C1-PARD6B C2-GATA3 C3-DAPI BF C4-FACTIN 7.5uM U73122 treatment DMSO media ctrl.lif - U73122 7.5uM/192:0187-0529-0601:c:2/5 z:38/76 - U73122 7.5uM/192	30.07	0.75439
220120 C1-PARD6B C2-GATA3 C3-DAPI BF C4-FACTIN 7.5uM U73122 treatment DMSO media ctrl.lif - ctrl media/208:0177-0575-0673:c:2/5 z:36/81 - ctrl media/208	42.82	1.06863														220120 C1-PARD6B C2-GATA3 C3-DAPI BF C4-FACTIN 7.5uM U73122 treatment DMSO media ctrl.lif - U73122 7.5uM/192:0187-0486-0565:c:2/5 z:38/76 - U73122 7.5uM/192	39.86
220120 C1-PARD6B C2-GATA3 C3-DAPI BF C4-FACTIN 7.5uM U73122 treatment DMSO media ctrl.lif - ctrl media/208:0177-0533-0726:c:2/5 z:36/81 - ctrl media/208	40.07															220120 C1-PARD6B C2-GATA3 C3-DAPI BF C4-FACTIN 7.5uM U73122 treatment DMSO media ctrl.lif - U73122 7.5uM/192:0127-0470-0345:c:2/5 z:26/76 - U73122 7.5uM/192	32.48	0.799803
220120 C1-PARD6B C2-GATA3 C3-DAPI BF C4-FACTIN 7.5uM U73122 treatment DMSO media ctrl.lif - ctrl media/208:0177-0441-0779:c:2/5 z:36/81 - ctrl media/208	32.39	0.768082														220120 C1-PARD6B C2-GATA3 C3-DAPI BF C4-FACTIN 7.5uM U73122 treatment DMSO media ctrl.lif - U73122 7.5uM/192:0127-0417-0327:c:2/5 z:26/76 - U73122 7.5uM/192	40.61
220120 C1-PARD6B C2-GATA3 C3-DAPI BF C4-FACTIN 7.5uM U73122 treatment DMSO media ctrl.lif - ctrl media/208:0177-0466-0727:c:2/5 z:36/81 - ctrl media/208	42.17
Embryo 207
220120 C1-PARD6B C2-GATA3 C3-DAPI BF C4-FACTIN 7.5uM U73122 treatment DMSO media ctrl.lif - ctrl media/207:0147-0380-0415:c:2/5 z:30/81 - ctrl media/207	38.38	0.643097
220120 C1-PARD6B C2-GATA3 C3-DAPI BF C4-FACTIN 7.5uM U73122 treatment DMSO media ctrl.lif - ctrl media/207:0147-0338-0440:c:2/5 z:30/81 - ctrl media/207	59.68
220120 C1-PARD6B C2-GATA3 C3-DAPI BF C4-FACTIN 7.5uM U73122 treatment DMSO media ctrl.lif - ctrl media/207:0212-0477-0585:c:2/5 z:43/81 - ctrl media/207	32.07	0.821255
220120 C1-PARD6B C2-GATA3 C3-DAPI BF C4-FACTIN 7.5uM U73122 treatment DMSO media ctrl.lif - ctrl media/207:0212-0495-0521:c:2/5 z:43/81 - ctrl media/207	39.05
220120 C1-PARD6B C2-GATA3 C3-DAPI BF C4-FACTIN 7.5uM U73122 treatment DMSO media ctrl.lif - ctrl media/207:0212-0381-0528:c:2/5 z:43/81 - ctrl media/207	39.55	0.885382
220120 C1-PARD6B C2-GATA3 C3-DAPI BF C4-FACTIN 7.5uM U73122 treatment DMSO media ctrl.lif - ctrl media/207:0212-0401-0477:c:2/5 z:43/81 - ctrl media/207	44.67
220120 C1-PARD6B C2-GATA3 C3-DAPI BF C4-FACTIN 7.5uM U73122 treatment DMSO media ctrl.lif - ctrl media/207:0212-0654-0511:c:2/5 z:43/81 - ctrl media/207	32.59	0.936763
220120 C1-PARD6B C2-GATA3 C3-DAPI BF C4-FACTIN 7.5uM U73122 treatment DMSO media ctrl.lif - ctrl media/207:0212-0633-0458:c:2/5 z:43/81 - ctrl media/207	34.79
220120 C1-PARD6B C2-GATA3 C3-DAPI BF C4-FACTIN 7.5uM U73122 treatment DMSO media ctrl.lif - ctrl media/207:0212-0646-0637:c:2/5 z:43/81 - ctrl media/207	31.81	0.909117
220120 C1-PARD6B C2-GATA3 C3-DAPI BF C4-FACTIN 7.5uM U73122 treatment DMSO media ctrl.lif - ctrl media/207:0212-0599-0671:c:2/5 z:43/81 - ctrl media/207	34.99
220120 C1-PARD6B C2-GATA3 C3-DAPI BF C4-FACTIN 7.5uM U73122 treatment DMSO media ctrl.lif - ctrl media/207:0212-0698-0417:c:2/5 z:43/81 - ctrl media/207	26.23	0.793166
220120 C1-PARD6B C2-GATA3 C3-DAPI BF C4-FACTIN 7.5uM U73122 treatment DMSO media ctrl.lif - ctrl media/207:0212-0646-0414:c:2/5 z:43/81 - ctrl media/207	33.07
Embryo 206
220120 C1-PARD6B C2-GATA3 C3-DAPI BF C4-FACTIN 7.5uM U73122 treatment DMSO media ctrl.lif - ctrl media/206:0072-0561-0573:c:2/5 z:15/81 - ctrl media/206	141.17	2.02947
220120 C1-PARD6B C2-GATA3 C3-DAPI BF C4-FACTIN 7.5uM U73122 treatment DMSO media ctrl.lif - ctrl media/206:0072-0560-0601:c:2/5 z:15/81 - ctrl media/206	69.56
220120 C1-PARD6B C2-GATA3 C3-DAPI BF C4-FACTIN 7.5uM U73122 treatment DMSO media ctrl.lif - ctrl media/206:0072-0454-0533:c:2/5 z:15/81 - ctrl media/206	84.61	1.63656
220120 C1-PARD6B C2-GATA3 C3-DAPI BF C4-FACTIN 7.5uM U73122 treatment DMSO media ctrl.lif - ctrl media/206:0072-0499-0568:c:2/5 z:15/81 - ctrl media/206	51.7
220120 C1-PARD6B C2-GATA3 C3-DAPI BF C4-FACTIN 7.5uM U73122 treatment DMSO media ctrl.lif - ctrl media/206:0072-0530-0469:c:2/5 z:15/81 - ctrl media/206	85.59	1.6334
220120 C1-PARD6B C2-GATA3 C3-DAPI BF C4-FACTIN 7.5uM U73122 treatment DMSO media ctrl.lif - ctrl media/206:0072-0576-0465:c:2/5 z:15/81 - ctrl media/206	52.4
220120 C1-PARD6B C2-GATA3 C3-DAPI BF C4-FACTIN 7.5uM U73122 treatment DMSO media ctrl.lif - ctrl media/206:0072-0659-0497:c:2/5 z:15/81 - ctrl media/206	91.6	1.99347
220120 C1-PARD6B C2-GATA3 C3-DAPI BF C4-FACTIN 7.5uM U73122 treatment DMSO media ctrl.lif - ctrl media/206:0072-0634-0541:c:2/5 z:15/81 - ctrl media/206	45.95
220120 C1-PARD6B C2-GATA3 C3-DAPI BF C4-FACTIN 7.5uM U73122 treatment DMSO media ctrl.lif - ctrl media/206:0097-0664-0393:c:2/5 z:22/81 - ctrl media/206	104.17	1.71501
220120 C1-PARD6B C2-GATA3 C3-DAPI BF C4-FACTIN 7.5uM U73122 treatment DMSO media ctrl.lif - ctrl media/206:0097-0611-0407:c:2/5 z:22/81 - ctrl media/206	60.74
220120 C1-PARD6B C2-GATA3 C3-DAPI BF C4-FACTIN 7.5uM U73122 treatment DMSO media ctrl.lif - ctrl media/206:0097-0448-0658:c:2/5 z:22/81 - ctrl media/206	124.07	2.9753
220120 C1-PARD6B C2-GATA3 C3-DAPI BF C4-FACTIN 7.5uM U73122 treatment DMSO media ctrl.lif - ctrl media/206:0097-0432-0609:c:2/5 z:22/81 - ctrl media/206	41.7
220120 C1-PARD6B C2-GATA3 C3-DAPI BF C4-FACTIN 7.5uM U73122 treatment DMSO media ctrl.lif - ctrl media/206:0132-0566-0683:c:2/5 z:27/81 - ctrl media/206	141.74	2.86286
220120 C1-PARD6B C2-GATA3 C3-DAPI BF C4-FACTIN 7.5uM U73122 treatment DMSO media ctrl.lif - ctrl media/206:0132-0540-0643:c:2/5 z:27/81 - ctrl media/206	49.51
220120 C1-PARD6B C2-GATA3 C3-DAPI BF C4-FACTIN 7.5uM U73122 treatment DMSO media ctrl.lif - ctrl media/206:0132-0652-0619:c:2/5 z:27/81 - ctrl media/206	78.67	1.70985
220120 C1-PARD6B C2-GATA3 C3-DAPI BF C4-FACTIN 7.5uM U73122 treatment DMSO media ctrl.lif - ctrl media/206:0132-0671-0651:c:2/5 z:27/81 - ctrl media/206	46.01
220120 C1-PARD6B C2-GATA3 C3-DAPI BF C4-FACTIN 7.5uM U73122 treatment DMSO media ctrl.lif - ctrl media/206:0132-0519-0323:c:2/5 z:27/81 - ctrl media/206	79.7	1.42245
220120 C1-PARD6B C2-GATA3 C3-DAPI BF C4-FACTIN 7.5uM U73122 treatment DMSO media ctrl.lif - ctrl media/206:0132-0513-0381:c:2/5 z:27/81 - ctrl media/206	56.03
220120 C1-PARD6B C2-GATA3 C3-DAPI BF C4-FACTIN 7.5uM U73122 treatment DMSO media ctrl.lif - ctrl media/206:0132-0414-0472:c:2/5 z:27/81 - ctrl media/206	79.43	2.86028
220120 C1-PARD6B C2-GATA3 C3-DAPI BF C4-FACTIN 7.5uM U73122 treatment DMSO media ctrl.lif - ctrl media/206:0132-0416-0517:c:2/5 z:27/81 - ctrl media/206	27.77
220120 C1-PARD6B C2-GATA3 C3-DAPI BF C4-FACTIN 7.5uM U73122 treatment DMSO media ctrl.lif - ctrl media/206:0132-0369-0593:c:2/5 z:27/81 - ctrl media/206	42.68	1.50494
220120 C1-PARD6B C2-GATA3 C3-DAPI BF C4-FACTIN 7.5uM U73122 treatment DMSO media ctrl.lif - ctrl media/206:0132-0407-0596:c:2/5 z:27/81 - ctrl media/206	28.36
220120 C1-PARD6B C2-GATA3 C3-DAPI BF C4-FACTIN 7.5uM U73122 treatment DMSO media ctrl.lif - ctrl media/206:0197-0497-0602:c:2/5 z:40/81 - ctrl media/206	40.15	1.42832
220120 C1-PARD6B C2-GATA3 C3-DAPI BF C4-FACTIN 7.5uM U73122 treatment DMSO media ctrl.lif - ctrl media/206:0197-0461-0632:c:2/5 z:40/81 - ctrl media/206	28.11
220120 C1-PARD6B C2-GATA3 C3-DAPI BF C4-FACTIN 7.5uM U73122 treatment DMSO media ctrl.lif - ctrl media/206:0197-0461-0510:c:2/5 z:40/81 - ctrl media/206	40.6	1.9902
220120 C1-PARD6B C2-GATA3 C3-DAPI BF C4-FACTIN 7.5uM U73122 treatment DMSO media ctrl.lif - ctrl media/206:0197-0428-0496:c:2/5 z:40/81 - ctrl media/206	20.4
220120 C1-PARD6B C2-GATA3 C3-DAPI BF C4-FACTIN 7.5uM U73122 treatment DMSO media ctrl.lif - ctrl media/206:0197-0635-0397:c:2/5 z:40/81 - ctrl media/206	103.26	2.18771
220120 C1-PARD6B C2-GATA3 C3-DAPI BF C4-FACTIN 7.5uM U73122 treatment DMSO media ctrl.lif - ctrl media/206:0197-0676-0437:c:2/5 z:40/81 - ctrl media/206	47.2
220120 C1-PARD6B C2-GATA3 C3-DAPI BF C4-FACTIN 7.5uM U73122 treatment DMSO media ctrl.lif - ctrl media/206:0202-0672-0625:c:2/5 z:43/81 - ctrl media/206	73.89	2.20633
220120 C1-PARD6B C2-GATA3 C3-DAPI BF C4-FACTIN 7.5uM U73122 treatment DMSO media ctrl.lif - ctrl media/206:0202-0681-0588:c:2/5 z:43/81 - ctrl media/206	33.49
220120 C1-PARD6B C2-GATA3 C3-DAPI BF C4-FACTIN 7.5uM U73122 treatment DMSO media ctrl.lif - ctrl media/206:0227-0671-0629:c:2/5 z:46/81 - ctrl media/206	72.33	2.34305
220120 C1-PARD6B C2-GATA3 C3-DAPI BF C4-FACTIN 7.5uM U73122 treatment DMSO media ctrl.lif - ctrl media/206:0227-0626-0640:c:2/5 z:46/81 - ctrl media/206	30.87
220120 C1-PARD6B C2-GATA3 C3-DAPI BF C4-FACTIN 7.5uM U73122 treatment DMSO media ctrl.lif - ctrl media/206:0227-0365-0450:c:2/5 z:46/81 - ctrl media/206	39.37	2.41682
220120 C1-PARD6B C2-GATA3 C3-DAPI BF C4-FACTIN 7.5uM U73122 treatment DMSO media ctrl.lif - ctrl media/206:0227-0352-0491:c:2/5 z:46/81 - ctrl media/206	16.29
220120 C1-PARD6B C2-GATA3 C3-DAPI BF C4-FACTIN 7.5uM U73122 treatment DMSO media ctrl.lif - ctrl media/206:0227-0469-0514:c:2/5 z:46/81 - ctrl media/206	34.74	2.16989
220120 C1-PARD6B C2-GATA3 C3-DAPI BF C4-FACTIN 7.5uM U73122 treatment DMSO media ctrl.lif - ctrl media/206:0227-0416-0520:c:2/5 z:46/81 - ctrl media/206	16.01
Embryo 204
220120 C1-PARD6B C2-GATA3 C3-DAPI BF C4-FACTIN 7.5uM U73122 treatment DMSO media ctrl.lif - ctrl media/204:0247-0638-0596:c:2/5 z:51/113 - ctrl media/204	176.97	4.7054
220120 C1-PARD6B C2-GATA3 C3-DAPI BF C4-FACTIN 7.5uM U73122 treatment DMSO media ctrl.lif - ctrl media/204:0247-0618-0556:c:2/5 z:51/113 - ctrl media/204	37.61
220120 C1-PARD6B C2-GATA3 C3-DAPI BF C4-FACTIN 7.5uM U73122 treatment DMSO media ctrl.lif - ctrl media/204:0247-0314-0602:c:2/5 z:51/113 - ctrl media/204	208.85	6.25112
220120 C1-PARD6B C2-GATA3 C3-DAPI BF C4-FACTIN 7.5uM U73122 treatment DMSO media ctrl.lif - ctrl media/204:0247-0334-0563:c:2/5 z:51/113 - ctrl media/204	33.41
220120 C1-PARD6B C2-GATA3 C3-DAPI BF C4-FACTIN 7.5uM U73122 treatment DMSO media ctrl.lif - ctrl media/204:0247-0260-0528:c:2/5 z:51/113 - ctrl media/204	182.32	7.16104
220120 C1-PARD6B C2-GATA3 C3-DAPI BF C4-FACTIN 7.5uM U73122 treatment DMSO media ctrl.lif - ctrl media/204:0247-0260-0473:c:2/5 z:51/113 - ctrl media/204	25.46
220120 C1-PARD6B C2-GATA3 C3-DAPI BF C4-FACTIN 7.5uM U73122 treatment DMSO media ctrl.lif - ctrl media/204:0247-0306-0361:c:2/5 z:51/113 - ctrl media/204	163.87	4.82254
220120 C1-PARD6B C2-GATA3 C3-DAPI BF C4-FACTIN 7.5uM U73122 treatment DMSO media ctrl.lif - ctrl media/204:0247-0279-0398:c:2/5 z:51/113 - ctrl media/204	33.98
220120 C1-PARD6B C2-GATA3 C3-DAPI BF C4-FACTIN 7.5uM U73122 treatment DMSO media ctrl.lif - ctrl media/204:0247-0561-0282:c:2/5 z:51/113 - ctrl media/204	235.47	7.613
220120 C1-PARD6B C2-GATA3 C3-DAPI BF C4-FACTIN 7.5uM U73122 treatment DMSO media ctrl.lif - ctrl media/204:0247-0610-0302:c:2/5 z:51/113 - ctrl media/204	30.93
220120 C1-PARD6B C2-GATA3 C3-DAPI BF C4-FACTIN 7.5uM U73122 treatment DMSO media ctrl.lif - ctrl media/204:0207-0534-0564:c:2/5 z:42/113 - ctrl media/204	174.92	3.38337
220120 C1-PARD6B C2-GATA3 C3-DAPI BF C4-FACTIN 7.5uM U73122 treatment DMSO media ctrl.lif - ctrl media/204:0207-0499-0582:c:2/5 z:42/113 - ctrl media/204	51.7
220120 C1-PARD6B C2-GATA3 C3-DAPI BF C4-FACTIN 7.5uM U73122 treatment DMSO media ctrl.lif - ctrl media/204:0207-0623-0487:c:2/5 z:42/113 - ctrl media/204	191.37	4.2152
220120 C1-PARD6B C2-GATA3 C3-DAPI BF C4-FACTIN 7.5uM U73122 treatment DMSO media ctrl.lif - ctrl media/204:0207-0652-0463:c:2/5 z:42/113 - ctrl media/204	45.4
220120 C1-PARD6B C2-GATA3 C3-DAPI BF C4-FACTIN 7.5uM U73122 treatment DMSO media ctrl.lif - ctrl media/204:0207-0552-0407:c:2/5 z:42/113 - ctrl media/204	176.78	3.84304
220120 C1-PARD6B C2-GATA3 C3-DAPI BF C4-FACTIN 7.5uM U73122 treatment DMSO media ctrl.lif - ctrl media/204:0207-0527-0447:c:2/5 z:42/113 - ctrl media/204	46
220120 C1-PARD6B C2-GATA3 C3-DAPI BF C4-FACTIN 7.5uM U73122 treatment DMSO media ctrl.lif - ctrl media/204:0207-0484-0367:c:2/5 z:42/113 - ctrl media/204	201.83	5.355
220120 C1-PARD6B C2-GATA3 C3-DAPI BF C4-FACTIN 7.5uM U73122 treatment DMSO media ctrl.lif - ctrl media/204:0207-0458-0398:c:2/5 z:42/113 - ctrl media/204	37.69
220120 C1-PARD6B C2-GATA3 C3-DAPI BF C4-FACTIN 7.5uM U73122 treatment DMSO media ctrl.lif - ctrl media/204:0207-0420-0328:c:2/5 z:42/113 - ctrl media/204	242.45	7.06234
220120 C1-PARD6B C2-GATA3 C3-DAPI BF C4-FACTIN 7.5uM U73122 treatment DMSO media ctrl.lif - ctrl media/204:0207-0427-0363:c:2/5 z:42/113 - ctrl media/204	34.33
220120 C1-PARD6B C2-GATA3 C3-DAPI BF C4-FACTIN 7.5uM U73122 treatment DMSO media ctrl.lif - ctrl media/204:0207-0416-0625:c:2/5 z:42/113 - ctrl media/204	208.26	5.81894
220120 C1-PARD6B C2-GATA3 C3-DAPI BF C4-FACTIN 7.5uM U73122 treatment DMSO media ctrl.lif - ctrl media/204:0207-0372-0630:c:2/5 z:42/113 - ctrl media/204	35.79
220120 C1-PARD6B C2-GATA3 C3-DAPI BF C4-FACTIN 7.5uM U73122 treatment DMSO media ctrl.lif - ctrl media/204:0177-0529-0493:c:2/5 z:36/113 - ctrl media/204	190.92	3.30369
220120 C1-PARD6B C2-GATA3 C3-DAPI BF C4-FACTIN 7.5uM U73122 treatment DMSO media ctrl.lif - ctrl media/204:0177-0499-0481:c:2/5 z:36/113 - ctrl media/204	57.79
220120 C1-PARD6B C2-GATA3 C3-DAPI BF C4-FACTIN 7.5uM U73122 treatment DMSO media ctrl.lif - ctrl media/204:0177-0407-0490:c:2/5 z:36/113 - ctrl media/204	181.42	4.87426
220120 C1-PARD6B C2-GATA3 C3-DAPI BF C4-FACTIN 7.5uM U73122 treatment DMSO media ctrl.lif - ctrl media/204:0177-0368-0490:c:2/5 z:36/113 - ctrl media/204	37.22
220120 C1-PARD6B C2-GATA3 C3-DAPI BF C4-FACTIN 7.5uM U73122 treatment DMSO media ctrl.lif - ctrl media/204:0302-0499-0514:c:2/5 z:61/113 - ctrl media/204	42.17	1.29356
220120 C1-PARD6B C2-GATA3 C3-DAPI BF C4-FACTIN 7.5uM U73122 treatment DMSO media ctrl.lif - ctrl media/204:0302-0512-0525:c:2/5 z:61/113 - ctrl media/204	32.6
220120 C1-PARD6B C2-GATA3 C3-DAPI BF C4-FACTIN 7.5uM U73122 treatment DMSO media ctrl.lif - ctrl media/204:0302-0379-0482:c:2/5 z:61/113 - ctrl media/204	63.21	2.08752
220120 C1-PARD6B C2-GATA3 C3-DAPI BF C4-FACTIN 7.5uM U73122 treatment DMSO media ctrl.lif - ctrl media/204:0302-0428-0489:c:2/5 z:61/113 - ctrl media/204	30.28
220120 C1-PARD6B C2-GATA3 C3-DAPI BF C4-FACTIN 7.5uM U73122 treatment DMSO media ctrl.lif - ctrl media/204:0267-0450-0537:c:2/5 z:54/113 - ctrl media/204	96.85	2.70833
220120 C1-PARD6B C2-GATA3 C3-DAPI BF C4-FACTIN 7.5uM U73122 treatment DMSO media ctrl.lif - ctrl media/204:0267-0475-0463:c:2/5 z:54/113 - ctrl media/204	35.76
220120 C1-PARD6B C2-GATA3 C3-DAPI BF C4-FACTIN 7.5uM U73122 treatment DMSO media ctrl.lif - ctrl media/204:0267-0548-0512:c:2/5 z:54/113 - ctrl media/204	66.06	2.44214
220120 C1-PARD6B C2-GATA3 C3-DAPI BF C4-FACTIN 7.5uM U73122 treatment DMSO media ctrl.lif - ctrl media/204:0267-0512-0515:c:2/5 z:54/113 - ctrl media/204	27.05
220120 C1-PARD6B C2-GATA3 C3-DAPI BF C4-FACTIN 7.5uM U73122 treatment DMSO media ctrl.lif - ctrl media/204:0267-0540-0436:c:2/5 z:54/113 - ctrl media/204	125.28	3.41084
220120 C1-PARD6B C2-GATA3 C3-DAPI BF C4-FACTIN 7.5uM U73122 treatment DMSO media ctrl.lif - ctrl media/204:0267-0497-0455:c:2/5 z:54/113 - ctrl media/204	36.73
Embryo 203
220120 C1-PARD6B C2-GATA3 C3-DAPI BF C4-FACTIN 7.5uM U73122 treatment DMSO media ctrl.lif - ctrl media/203:0142-0667-0563:c:2/5 z:29/90 - ctrl media/203	34.82	0.645532
220120 C1-PARD6B C2-GATA3 C3-DAPI BF C4-FACTIN 7.5uM U73122 treatment DMSO media ctrl.lif - ctrl media/203:0142-0646-0618:c:2/5 z:29/90 - ctrl media/203	53.94
220120 C1-PARD6B C2-GATA3 C3-DAPI BF C4-FACTIN 7.5uM U73122 treatment DMSO media ctrl.lif - ctrl media/203:0142-0482-0621:c:2/5 z:29/90 - ctrl media/203	37.22	0.839423
220120 C1-PARD6B C2-GATA3 C3-DAPI BF C4-FACTIN 7.5uM U73122 treatment DMSO media ctrl.lif - ctrl media/203:0142-0434-0624:c:2/5 z:29/90 - ctrl media/203	44.34
220120 C1-PARD6B C2-GATA3 C3-DAPI BF C4-FACTIN 7.5uM U73122 treatment DMSO media ctrl.lif - ctrl media/203:0082-0510-0338:c:2/5 z:16/90 - ctrl media/203	38.46	0.751025
220120 C1-PARD6B C2-GATA3 C3-DAPI BF C4-FACTIN 7.5uM U73122 treatment DMSO media ctrl.lif - ctrl media/203:0082-0477-0409:c:2/5 z:16/90 - ctrl media/203	51.21
220120 C1-PARD6B C2-GATA3 C3-DAPI BF C4-FACTIN 7.5uM U73122 treatment DMSO media ctrl.lif - ctrl media/203:0082-0400-0524:c:2/5 z:16/90 - ctrl media/203	36.97	0.764633
220120 C1-PARD6B C2-GATA3 C3-DAPI BF C4-FACTIN 7.5uM U73122 treatment DMSO media ctrl.lif - ctrl media/203:0082-0382-0452:c:2/5 z:16/90 - ctrl media/203	48.35
220120 C1-PARD6B C2-GATA3 C3-DAPI BF C4-FACTIN 7.5uM U73122 treatment DMSO media ctrl.lif - ctrl media/203:0082-0615-0484:c:2/5 z:16/90 - ctrl media/203	38.85	0.795617
220120 C1-PARD6B C2-GATA3 C3-DAPI BF C4-FACTIN 7.5uM U73122 treatment DMSO media ctrl.lif - ctrl media/203:0082-0570-0531:c:2/5 z:16/90 - ctrl media/203	48.83
Embryo 201
220120 C1-PARD6B C2-GATA3 C3-DAPI BF C4-FACTIN 7.5uM U73122 treatment DMSO media ctrl.lif - ctrl media/201:0137-0372-0546:c:2/5 z:31/90 - ctrl media/201	35.71	0.647272
220120 C1-PARD6B C2-GATA3 C3-DAPI BF C4-FACTIN 7.5uM U73122 treatment DMSO media ctrl.lif - ctrl media/201:0137-0311-0535:c:2/5 z:31/90 - ctrl media/201	55.17
220120 C1-PARD6B C2-GATA3 C3-DAPI BF C4-FACTIN 7.5uM U73122 treatment DMSO media ctrl.lif - ctrl media/201:0102-0516-0497:c:2/5 z:20/90 - ctrl media/201	35.73	0.621391
220120 C1-PARD6B C2-GATA3 C3-DAPI BF C4-FACTIN 7.5uM U73122 treatment DMSO media ctrl.lif - ctrl media/201:0102-0459-0454:c:2/5 z:20/90 - ctrl media/201	57.5
220120 C1-PARD6B C2-GATA3 C3-DAPI BF C4-FACTIN 7.5uM U73122 treatment DMSO media ctrl.lif - ctrl media/201:0192-0623-0535:c:2/5 z:39/90 - ctrl media/201	35.47	0.730738
220120 C1-PARD6B C2-GATA3 C3-DAPI BF C4-FACTIN 7.5uM U73122 treatment DMSO media ctrl.lif - ctrl media/201:0192-0590-0603:c:2/5 z:39/90 - ctrl media/201	48.54
220120 C1-PARD6B C2-GATA3 C3-DAPI BF C4-FACTIN 7.5uM U73122 treatment DMSO media ctrl.lif - ctrl media/201:0192-0458-0648:c:2/5 z:39/90 - ctrl media/201	37.22	0.739666
220120 C1-PARD6B C2-GATA3 C3-DAPI BF C4-FACTIN 7.5uM U73122 treatment DMSO media ctrl.lif - ctrl media/201:0192-0470-0676:c:2/5 z:39/90 - ctrl media/201	50.32
