# Supplementary material for: Human embryo polarization requires PLC signaling to mediate trophectoderm specification
Source: eLife. 2021 Sep 27;10:e65068. doi: 10.7554/eLife.65068 (PMC8514238; doi:10.7554/eLife.65068)
Supplement: Figure 4—source data 1. — This file contains the source data used to make the graphs presented in Figure 4. GraphPad Prism was utilized to visually represent the quantitative data. [file elife-65068-fig4-data1.xlsx]

## Sheet: Figure 4b
CELL NUMBER, POSITION AND PARD6 LOCALIZATION
Total cell number	Outer Pard6+ cell number	Inner cell number
10	0	1
14	2	0
15	3	5
15	1	14
16	1	2
16	1	4
17	2	9
17	2	8
17	1	13
17	3	6
19	4	14
19	3	11
21	2	17
23	6	16
23	2	21
24	2	20
24	4	17
26	4	20
28	6	21
33	3	15
35	3	23

## Sheet: Figure 4d
QUANTIFICATION OF CELL SIZE
EMBRYOS WITH INNER CELLS				EMBRYOS AT THE 8 CELL STAGE
EXP Number	Embryo ID and Z plane	Cell size		EXP Number	Embryo ID and Z plane	Cell size
1	4 z98	565.228		1	22 z20	2282.84
1	4 z88	677.067		1	22 z25	1925.1
1	4 z88	696.198		1	22 z31	1983.08
1	4 z91	522.111		1	22 z47	2068.87
1	4 z81	849.093		1	22 z47	1516.74
1	4 z106	628.211		1	22 z55	1604.89
1	6 z99	883.234		1	22 z55	1534.11
1	6 z99	685.749		1	22 z67	1494.82
1	6 z99	497.242		1	25 z37	1778.97
1	6 z88	621.736		1	25 z49	1909.21
1	7 z111	1122.36		1	25 z59	2085.5
1	7 z85	758.739		1	25 z59	1192.26
1	7 z105	972.852		1	25 z53	1436.54
1	8 z102	1051.14		1	25 z68	1498.2
1	13 z99	1605.33		1	25 z77	2007.95
1	13 z117	603.783		1	25 z77	2233.98
1	16 z112	326.54		1	28 z26	1732.47
1	16 z112	229.123		1	28 z26	1927.9
1	16 z109	383.931		1	28 z41	1646.39
1	17 z96	788.023		1	28 z53	1565.6
1	19 z90	349.497		1	28 z53	2151.72
1	19 z90	455.008		1	28 z53	1447.29
1	19 z82	518.138		1	28 z69	1844.61
1	19 z82	895.448		1	28 z78	1961.89
1	20 z65	990.952		1	30 z88	1235.38
1	20 z65	1132.37		1	30 z103	1876.98
4	107 z25	736.166		1	30 z103	2306.09
4	107 z31	843.836		1	30 z103	1887.28
4	107 z26	670.149		1	30 z106	1086.31
4	107 z36	910.381		1	30 z133	1414.03
4	110 z48	1055.37		1	30 z133	1556.92
4	110 z48	516.496		1	30 z133	1526.75
4	111 z48	681.72		2	53 z22	1904.18
4	111 z48	860.728		2	53 z22	1273.16
4	112 z36	564.662		2	53 z31	1222.22
4	112 z36	547.472		2	53 z31	1488.84
4	113 z54	1352.1		2	53 z38	1435.9
4	113 z54	926.348		2	53 z38	1451.24
4	113 z42	1550.35		2	53 z47	1694.47
4	115 z36	751.307		2	53 z52	2477.98
4	115 z45	1108.27		2	54 z22	2116.3
4	115 z50	877.422		2	54 z33	2444.99
4	118 z44	1128.17		2	54 z43	1482.97
5	133 z51	954.705		2	54 z43	1482.69
5	134 z44	763.153		2	54 z49	1105.74
5	134 z40	707.345		2	54 z62	2371.19
5	134 z34	462.075		2	54 z62	1494.08
5	134 z42	523.645		2	54 z39	1570.2
3	80 z28	1896.4		2	57 z19	2286.73
3	79 z30	972.894		2	57 z19	2353.86
3	79 z30	1252.99		2	57 z37	1163.64
3	77 z47	680.199		2	57 z37	1334.3
3	77 z47	810.05		2	57 z37	2080.6
				2	57 z31	1010.42
				2	57 z54	2245.8
				2	57 z54	1807.58
				2	60 z13	895.432
				2	60 z20	1608.01
				2	60 z27	1334.3
				2	60 z36	1519.49
				2	60 z36	1311.48
				2	60 z36	1011.07
				2	60 z36	2214.19
				2	60 z53	1923.19
				2	62 z25	1762.65
				2	62 z33	1938.27
				2	62 z33	2627.07
				2	62 z52	1718.66
				2	62 z52	1245.62
				2	62 z58	1615.66
				2	62 z58	1587.12
				2	62 z71	2025.96
				2	33 z18	1727.94
				2	33 z27	1014.83
				2	33 z27	1159.71
				2	33 z38	1565.15
				2	33 z38	1456.61
				2	33 z38	1912.51
				2	33 z60	1836.8
				2	33 z60	1620.85
