# Supplementary figures and images for: Human embryo polarization requires PLC signaling to mediate trophectoderm specification
Source: eLife journal article supplement (doi:10.7554/elife.65068), 2021-09-27

**Figure 1 - figure supplement 1**

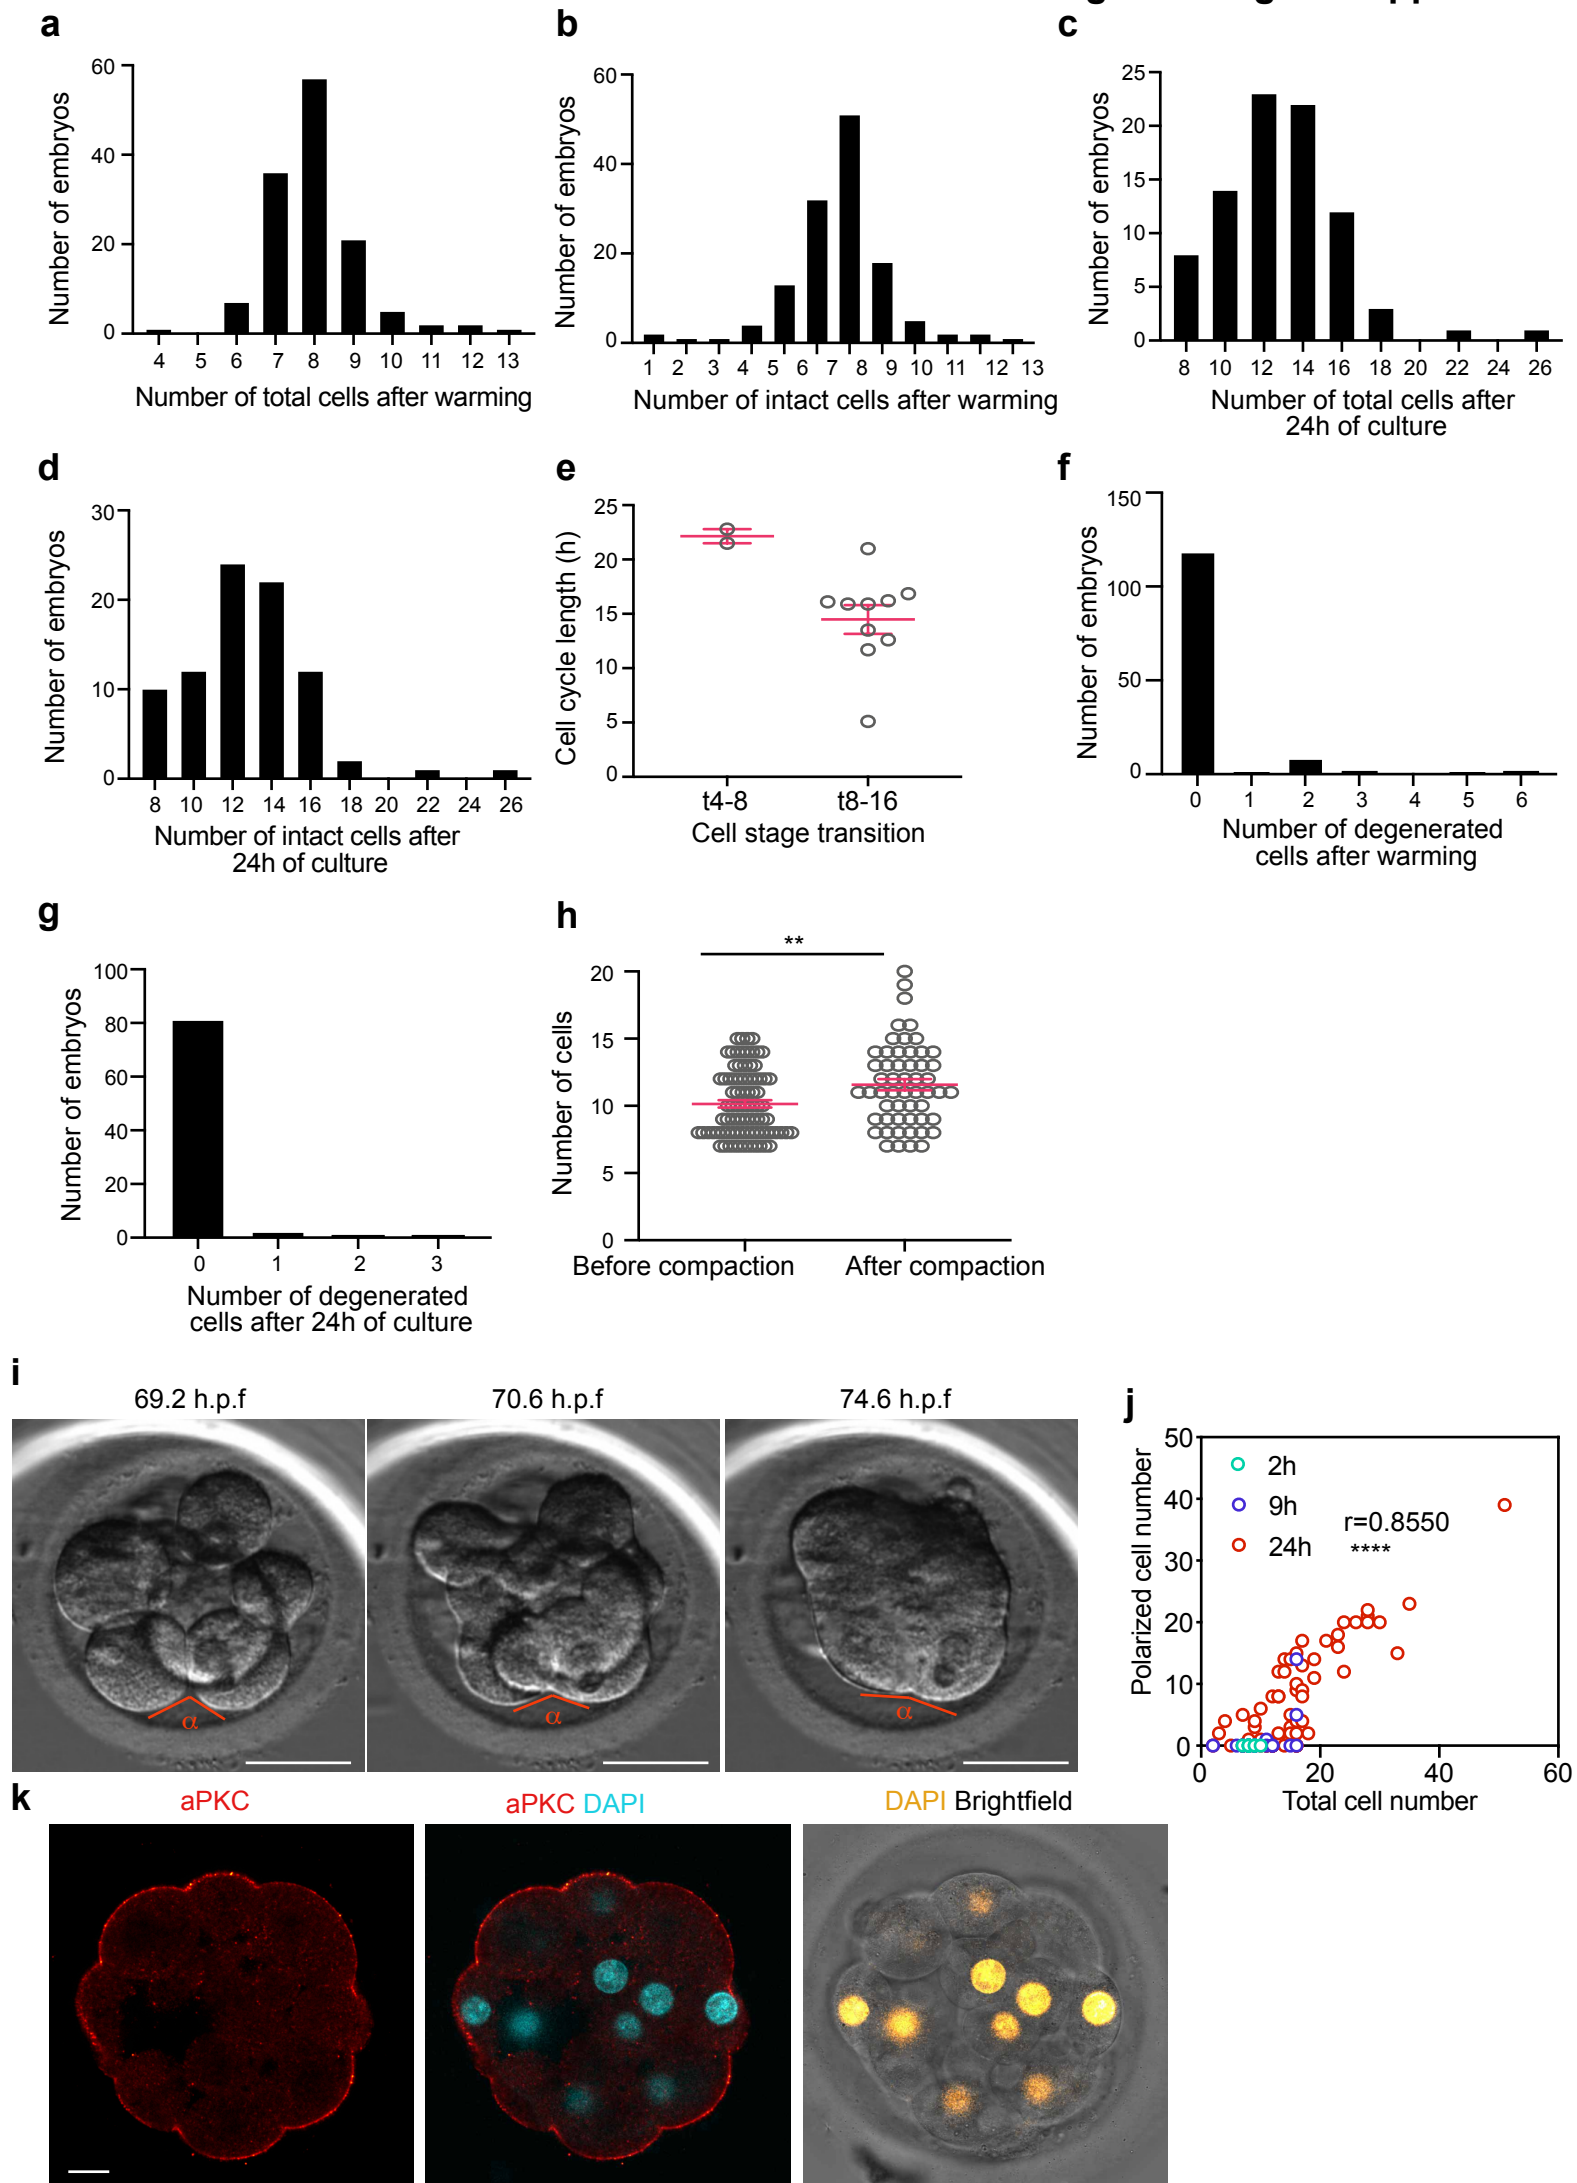

Supplement: supp [file elife-65068-supp-v1.zip]

**Figure 2 - Figure supplement 1**

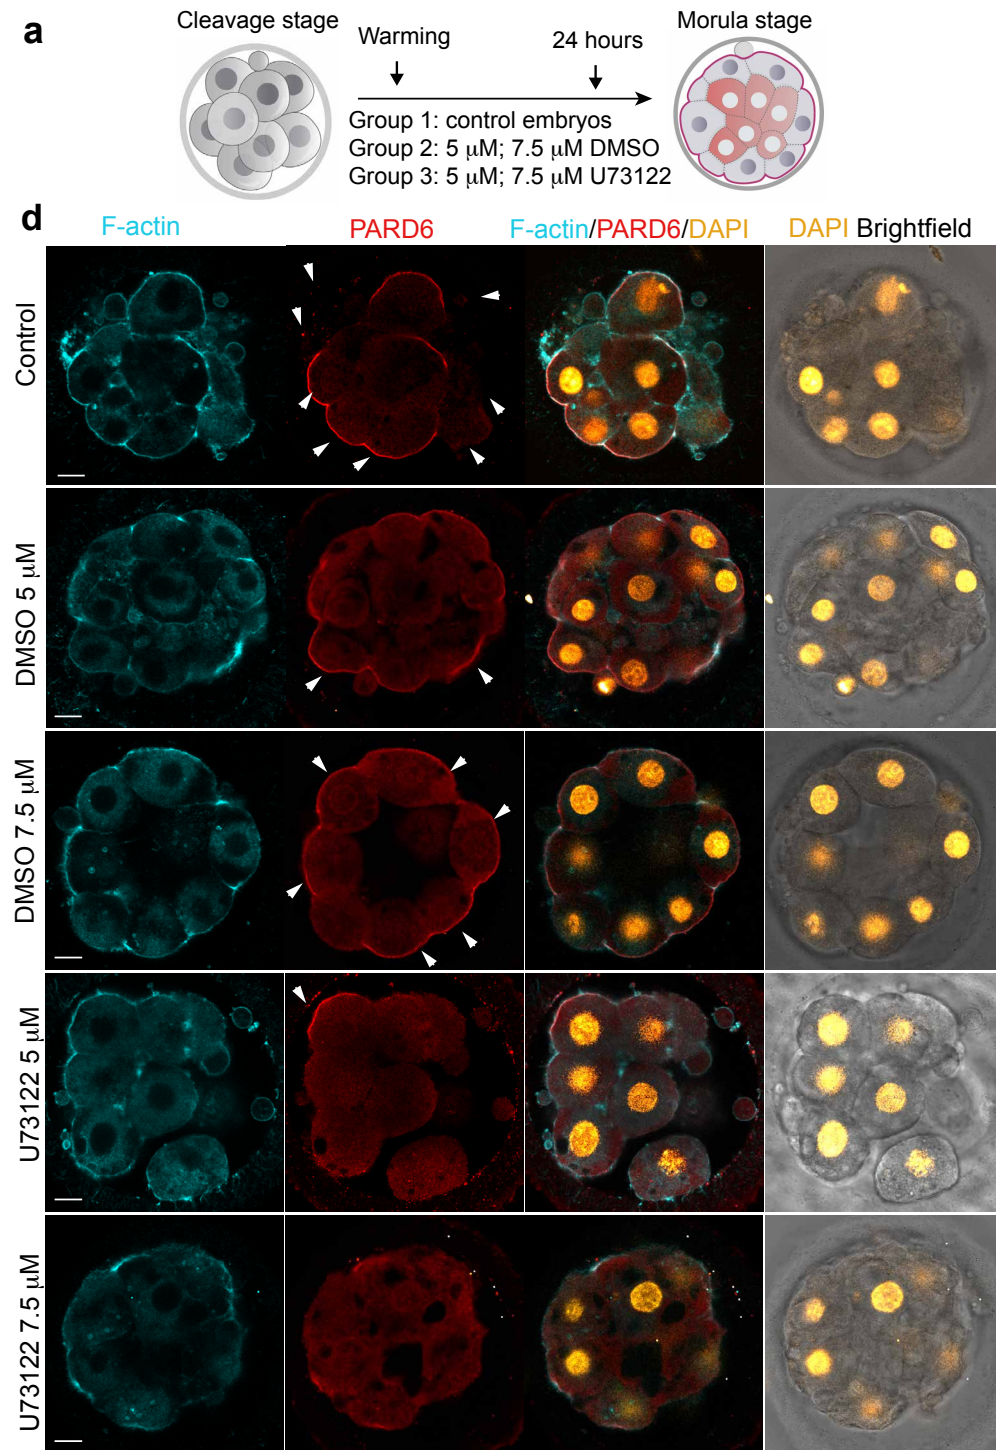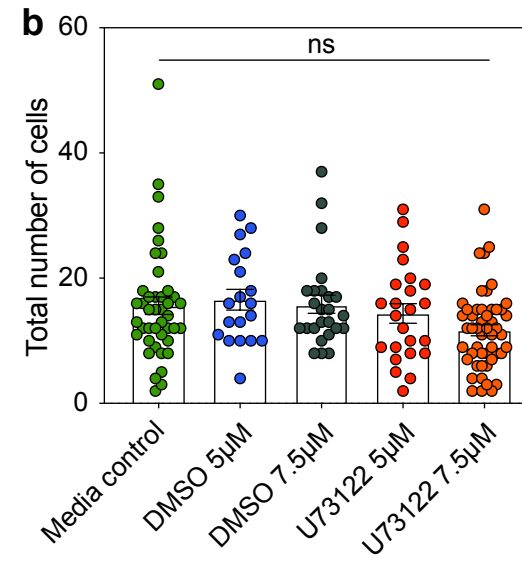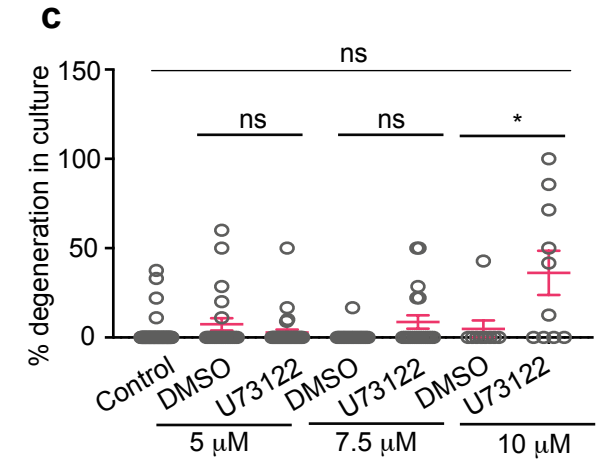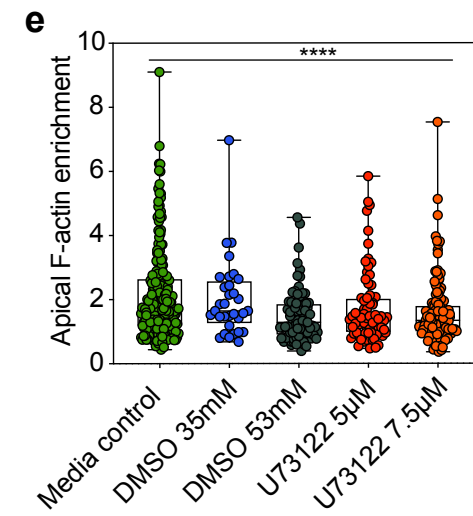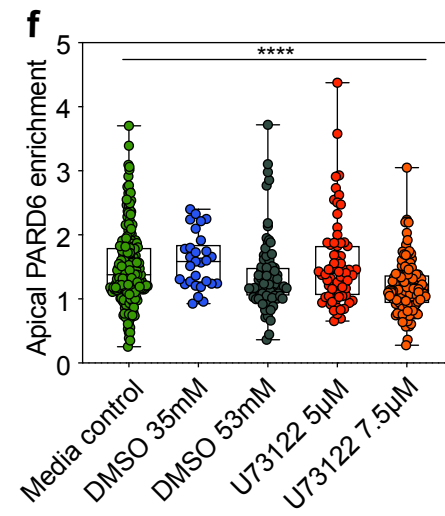

Supplement: supp [file elife-65068-supp-v1.zip]

Figure 3 - supplement 1

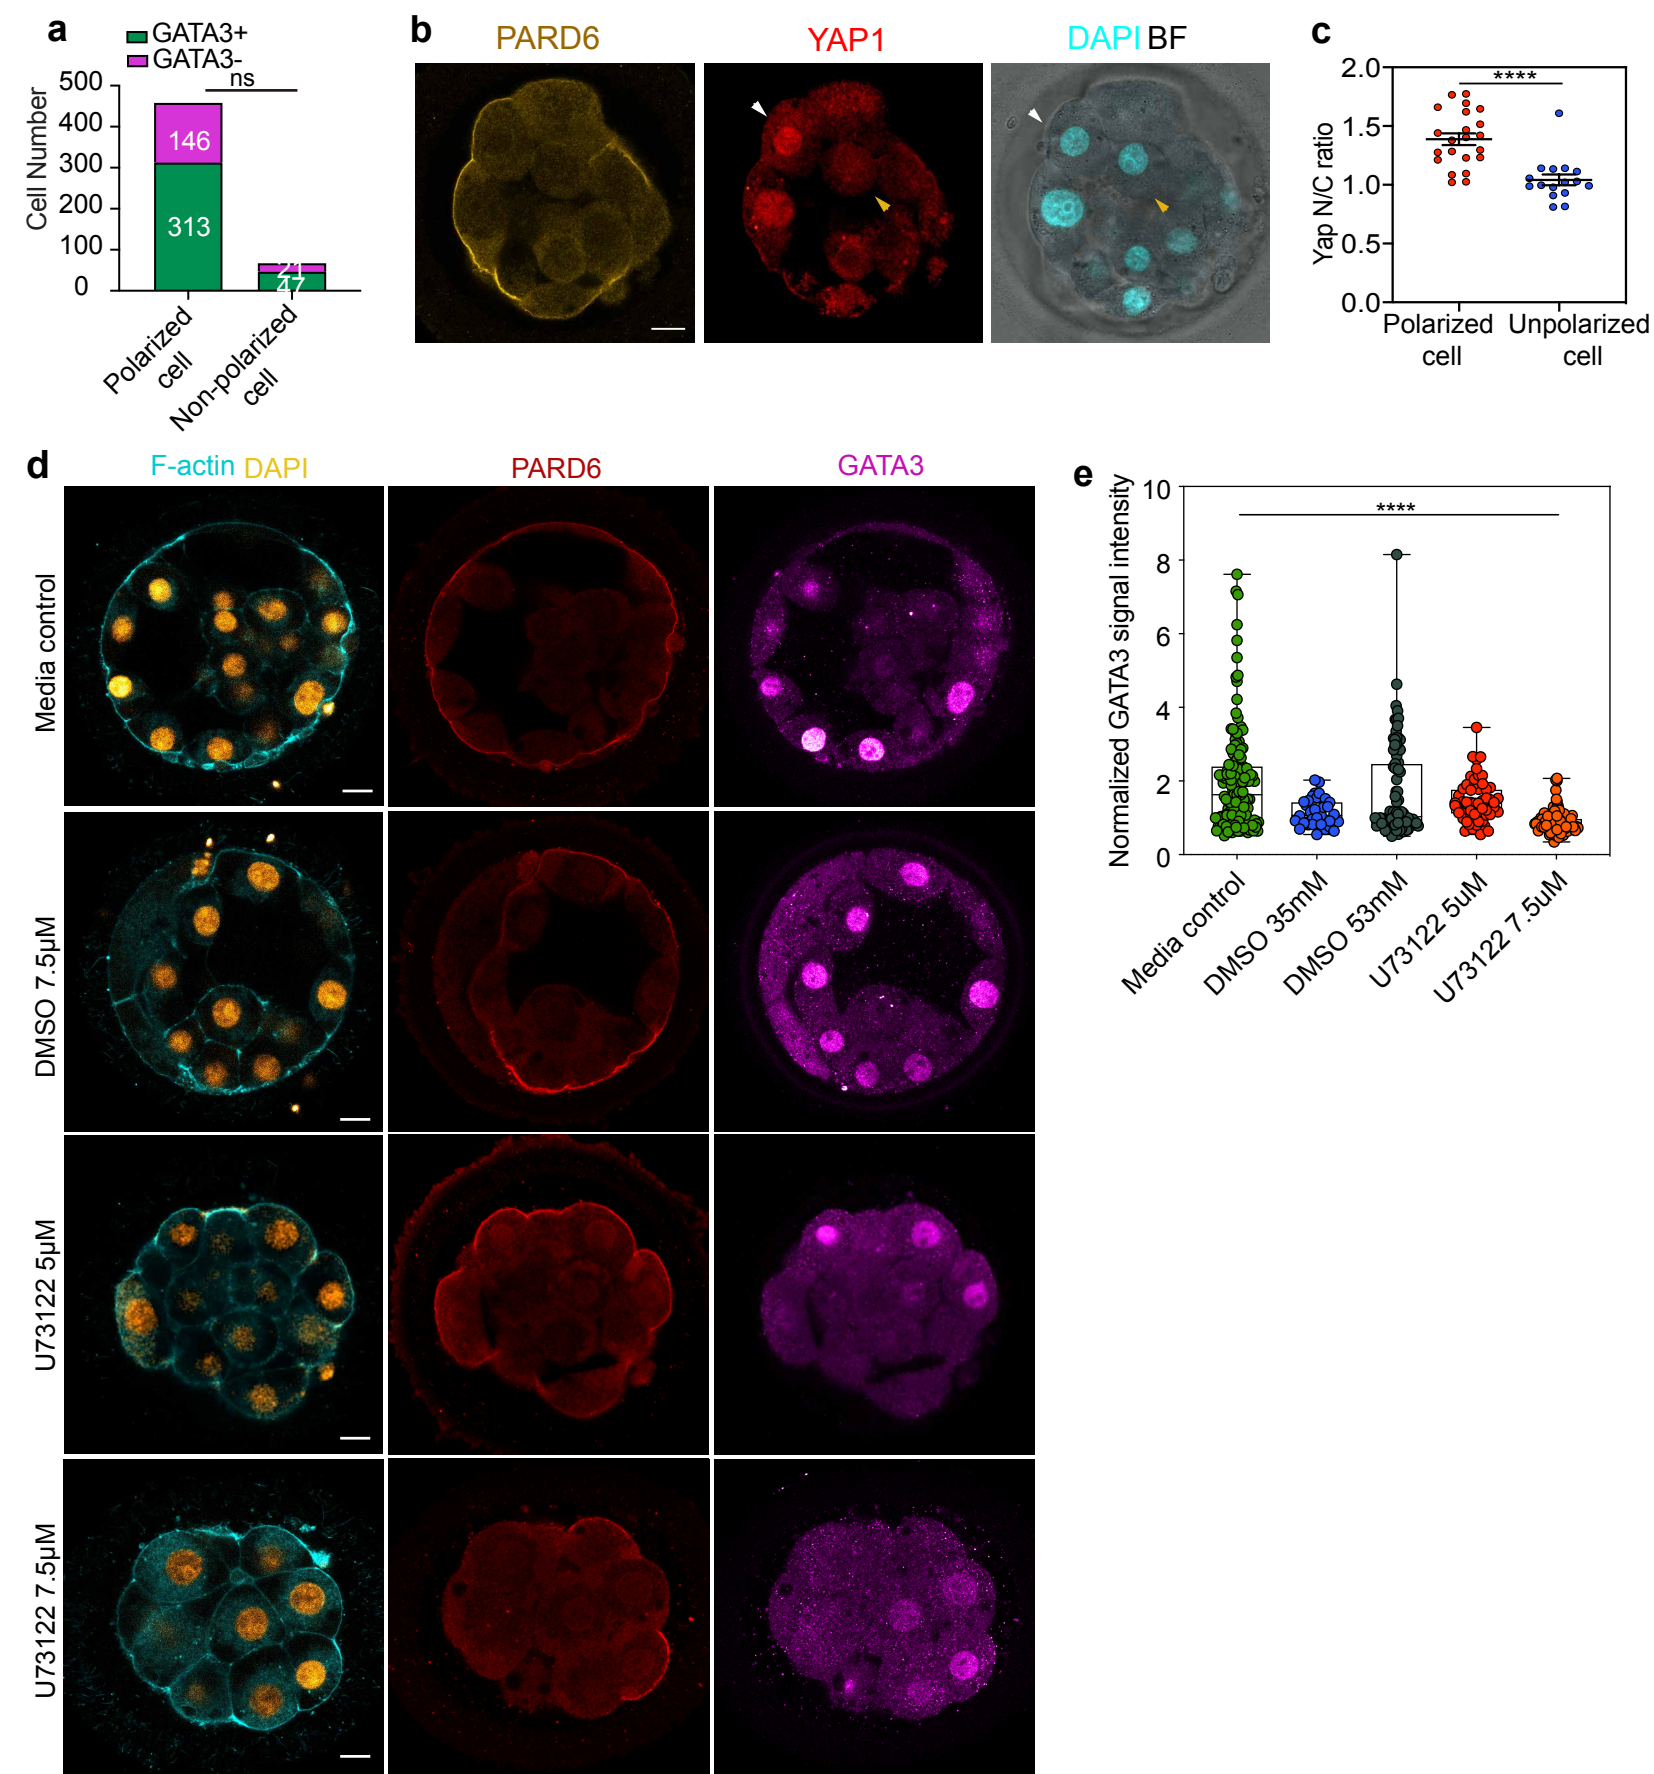

Supplement: supp [file elife-65068-supp-v1.zip]

**Figure 2 - figure supplement 2**

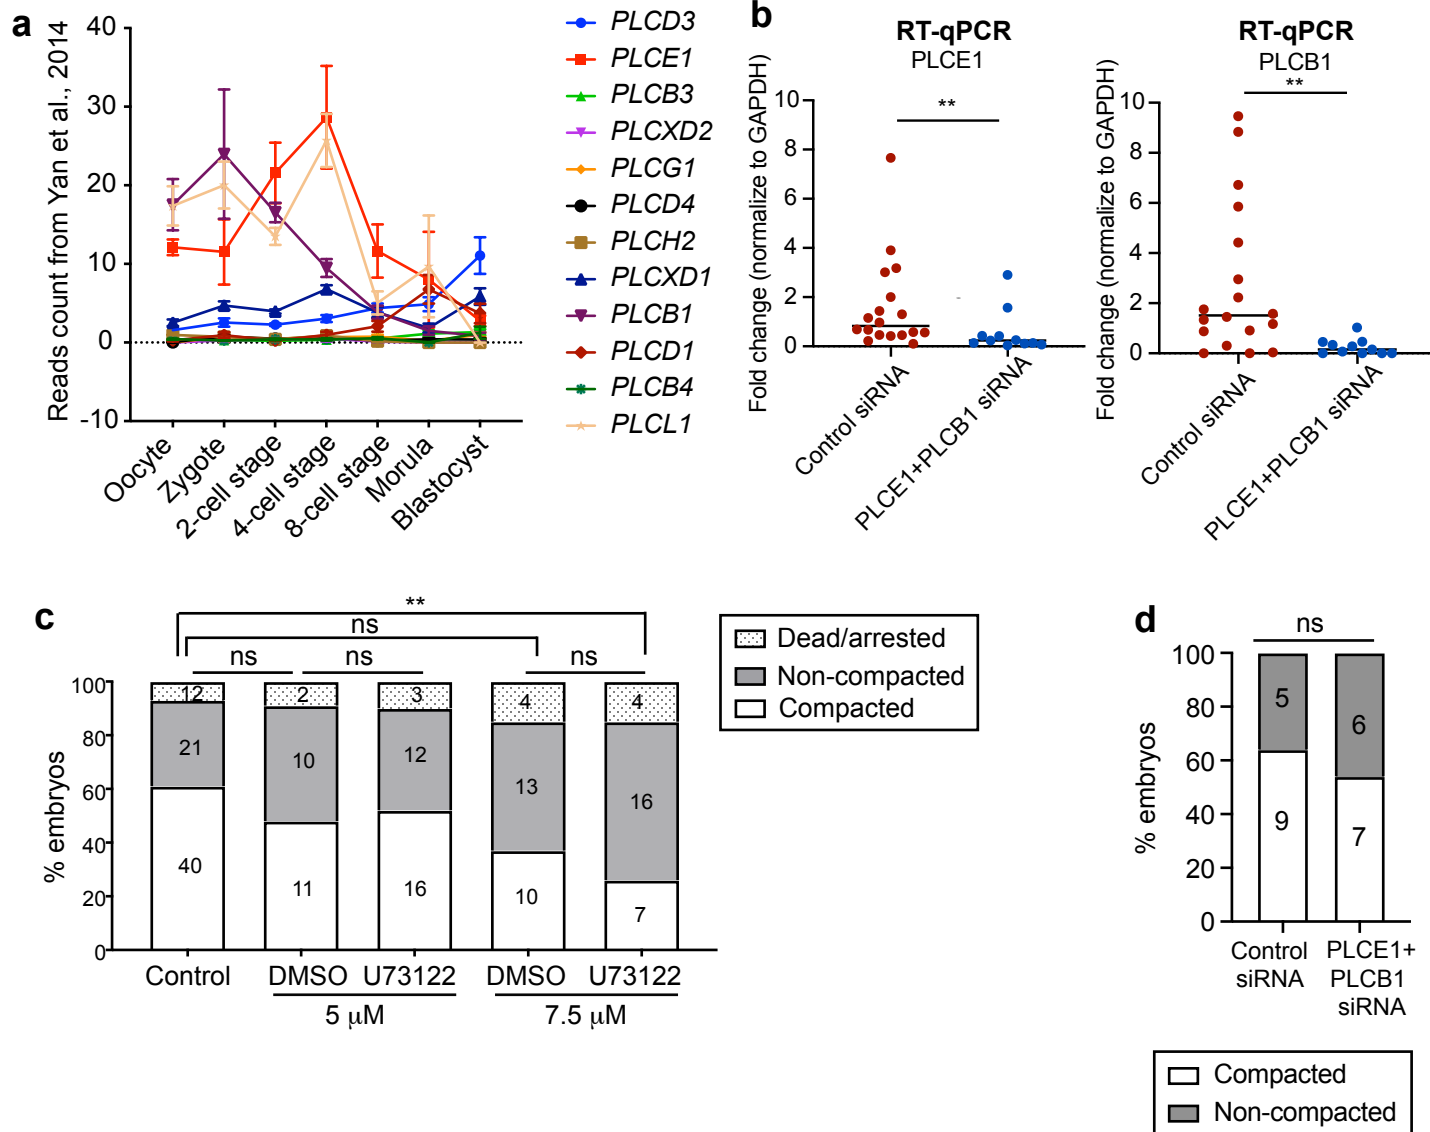

Supplement: supp [file elife-65068-supp-v1.zip]
